# Supplementary material for: Gram-Scale Synthesis of Heterogeneous Cu-MOFs Catalyst with Dual Functionalities for Late-stage Dicarbofunctionalization of Alkenes
Source: Research Square preprint supplement (doi:10.21203/rs.3.rs-4114254/v1), 2024-04-17
Supplement: Supplementary file 1 [file 8f46c31ad4cff0afec3cc9f0.docx]

**Supplementary Information**

**Gram-Scale Synthesis of Heterogeneous Cu-MOFs Catalyst with Dual Functionalities for Late-stage Dicarbofunctionalization of Alkenes**

Lu Dong,[a],# Hu Chen,[a],# Xiaoli Tan,[a],# Wei Sun, [b] Rui Feng, [c] Yanyuan Jia [a],* and Shuo Guo[a],*

[a] College of Chemistry and Chemical Engineering, Inner Mongolia University, Hohhot 010021, P. R. China

[b] Department of Chemistry, University of Michigan, Ann Arbor, MI 48109, USA

[c] School of Materials Science and Engineering, Smart Sensing Interdisciplinary Science Center, Nankai University & TKL of Metal and Molecule Based Material Chemistry, Tianjin 300350, P. R. China

**Table of Contents**

1 General information S1

2 Synthesis and characterization of IMU-108 S2

2.1 Solvothermal synthesis of IMU-108 [Cu3(5,5'-dsdibdc)1.5(H2O)2 DMA]·

(solvents)n S2

2.2 Gram scale synthesis of microcrystals of IMU-108 S2

2.3 Single crystal X-ray crystallography of IMU-108 S2

3 Basic performance test of IMU-108 S4

3.1 Stability evaluation, structure and optical characterization of IMU-108 S4

3.2 Solid state cyclic voltammetry of IMU-108 S6

3.3 Photoelectrochemical measurements of IMU-108 S7

4 Preparation of substrates S8

5 Reaction optimization tables S11

5.1 Optimization of bases S11

5.2 Optimization of reaction time S12

5.3 Optimization of the reaction concentration S12

6 Experimental procedures and spectral data S13

7 Mechanistic studies S31

7.1 Radical inhibition experiments S31

7.2 Stern-Völmer quenching experiment S32

7.3 Light on/off experiment S34

8 Stability studies of IMU-108 S35

8.1 Cyclic experiments S35

8.2 Leaching experiments S35

8.3 PXRD patterns of IMU-108 S36

8.4 The unit-cell parameters of IMU-108 before and after catalysis S37

9 Scale up of three-component coupling reactions S37

10 References S38

11 1H NMR, 13C NMR and 19F NMR Spectra S40

**1 General information**

**Materials**

Unless otherwise mentioned, all reactions were carried out in oven dried glassware under a nitrogen (purity ≥ 99.999%) atmosphere. All solvents were dried and purified by refluxing with CaH2 (2g/L) for 1 hour followed by fractional distillation. The purified solvents were stored over 4Å molecular sieves. Commercially available reagents were purchased from Adamas-beta, TCI, Aladdin, Macklin, J&K Chemical, Innochem, and Sigma Aldrich. Organic solutions were concentrated under reduced pressure on a Yarong RE-2000B rotary evaporator. Reactions were monitored by thin-layer chromatography (TLC) and the spots on TLC plates were visualized using a UV light. The LED lamps were purchased from Kessil 427 nm. 5-mercaptoisophthalic acid (H25-mbdc) was synthesized according to the literature method[1].

**Instruments**

1H, 19F, and 13C NMR spectra were recorded on Bruker AVANCE NEO 600 MHz NMR spectrometer. Chemical shifts (δ) were reported in parts per million (ppm) relative to deuterated chloroform (7.26 ppm for 1H NMR; 77.16 ppm for 13C NMR). 19F NMR chemical shifts were calibrated wiht trifluoromethoxy benzene as an internal standard (-57.40 ppm for 19F NMR). Coupling constants (*J*) were reported in Hz. The following abbreviations are used to represent the multiplicities in NMR spectra: singlet (s), doublet (d), triplet (t), quartet (q), multiplet (m), and broad (b).

Thermogravimetric analyses (TGA) were performed at a ramp rate of 5 ℃/min under a nitrogen flow with an STA449 FJupiter. Scanning electron microscopy (SEM) images were collected on a Hitachi S-4800 scanning electron microscope. Powder X-ray diffraction (PXRD) data were collected in the reflection mode at room temperature on a Malvern Panalytical Empyrean diffractometer with a Cu source (8.04 keV, wavelength = 1.5406 Å). The X-ray tube was operated at a voltage of 40 kV and a current of 40 mA. Simulation of the PXRD pattern was carried out based on the single-crystal data by diffraction crystal module of the Mercury program version 1.4.2 available free of charge via the Internet at <http://www.iucr.org>. The solid state UV-Vis spectra were measured by a Perkin Elmer LAMBDA 750 Spectrophotometer. Fluorescence spectra were recorded on a Hitachi F-4700 fluorescence spectrophotometer. The HR-MS results were obtained on a Waters G2-XS QToF mass spectrometer. GC-MS measurements were conducted on an Agilent 8860/5977B system.

**2 Synthesis and characterization of IMU-108**

## 2.1 Solvothermal synthesis of IMU-108 [Cu3(5,5'-dsdibdc)1.5(H2O)2 DMA]·(solvents)n

IMU-108 was synthesized by the solvothermal reaction of H25-mbdc (0.08 mmol) and Cu(NO3)2·3H2O (0.15 mmol) in DMA (1 mL) and ethanol (4 mL) at 70 ℃ for 3 days to give blue polyhedral shape crystals (Figure S1). The crystals were washed repeatedly with DMA followed by ethanol and dried in air. (Yield: ~ 70% based on ligand). (H25-mbdc = 5-mercaptoisophthalic acid, H45,5'-dsdibdc = 5,5'-disulfanediyldiisophthalic acid).


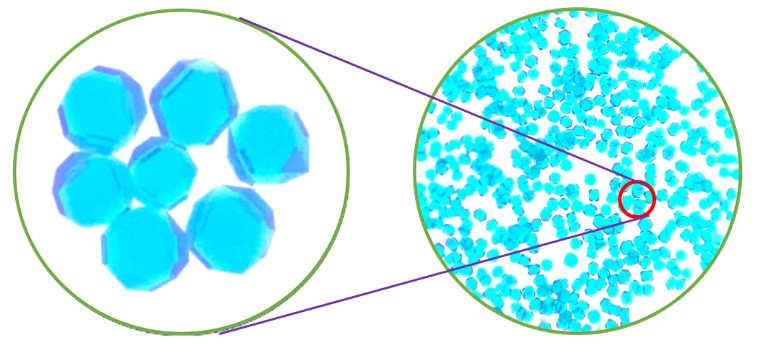


**Fig. 1** Optical images of IMU-108 under a microscope

## 2.2 Gram scale synthesis of microcrystals of IMU-108

A mixture of Cu(NO3)2·3H2O (11.95 mmol), H25-mbdc (5.66 mmol), DMA (30 mL) and ethanol (120 mL) were added to a 250 mL round-bottom flask and refluxed for 12 hours. After natural cooling to ambient temperature, blue powdery microcrystals of IMU-108 were obtained. The resulting products were rinsed with fresh DMA and ethanol, then dried in air (Yield: ~60% based on ligand).

## 2.3 Single crystal X-ray crystallography of IMU-108

Single-crystal X-ray diffraction test was produced on a Bruker APEX-II CCD with Cu K\α (λ = 1.54178). The crystal was kept at 293 K during data collection. The structure of IMU-108 was solved by direct methods and the full matrix least square method was used to refine the crystal structure. All non-hydrogen atoms were refined through anisotropic displacement parameters, and all hydrogen atoms were generated theoretically based on the calculated positions[2]. Detailed crystallographic data and structure refinement details for IMU-108 are listed in Table S1. The CCDC number for IMU-108 is 2293138.


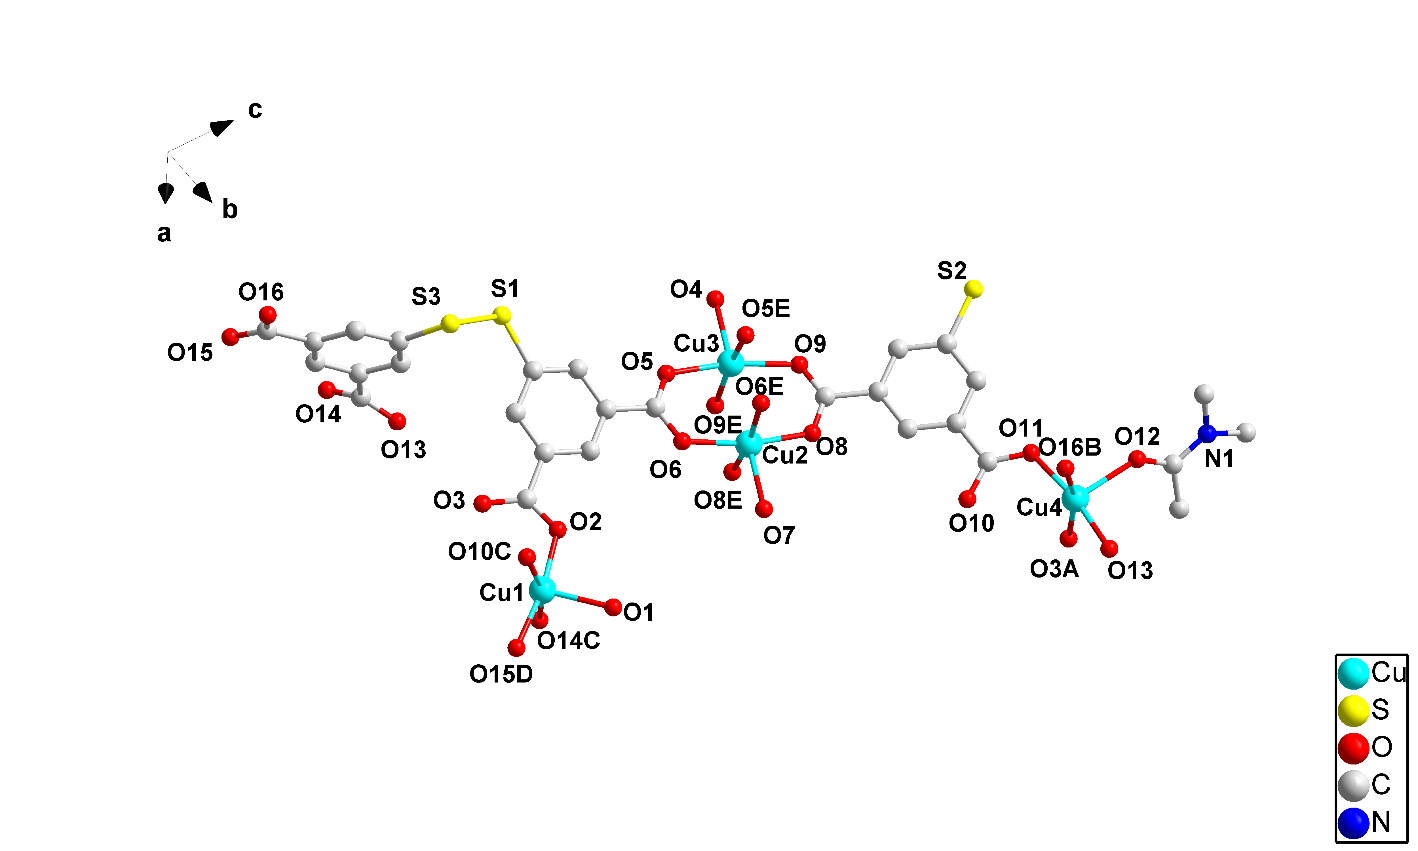


**Fig. 2** The coordination environment of Cu (II) ions in IMU-108

**Table 1.** Crystallographic data and refinement parameters of IMU-108

| Chemical formula | C32H31Cu3N2O16S3 |
| --- | --- |
| Formula weight | 986.39 |
| Crystal system | Tetragonal |
| Space group | *I*4/*m* |
| *a*/(Å) | 26.4385(2) |
| *b*/(Å) | 26.4385(2) |
| *c*/(Å) | 32.7064(5) |
| *α*/(°) | 90 |
| *β*/(°) | 90 |
| *γ*/(°) | 90 |
| *V*/(Å3) | 22861.6(5) |
| *Z* | 16 |
| *ρ*calc / g cm-3 | 1.146 |
| *F*(000) | 8000.0 |
| *T* / K | 293(2) |
| Reflections collected | 156024 |
| *R*int | 0.1664 |
| GOF on *F*2 | 1.040 |
| *R1 / wR2*[*I* > 2σ (*I*)] *a* | 0.0560/0.1529 |
| *R1 / wR2* [(all data)] *b* | 0.0743/0.1641 |

*a R1 = Σ||Fo| – |Fc|| / Σ|Fo|; b wR2 = {Σ[w(Fo2 – Fc2)2] / Σw (Fo2)2}1/2*

**3 Basic performance test of IMU-108**

## 3.1 Stability evaluation, structure and optical characterization of IMU-108

To evaluate the stability of IMU-108, thermogravimetric analyses (TGA) were carried out. The thermal weight loss of IMU-108 (purple line) is divided into two stages. The weight loss in the first stage (before 120 °C) is attributed to the removal of solvent molecules. The weight loss (260 − 320 °C) in the second stage is due to the structure of the frameworks begins to collapse and decompose. Activated frameworks IMU-108 were successfully obtained through solvent exchange of the as-synthesized samples with fresh ethanol absolute followed by the activation under vacuum at 180 °C for 6 hours to remove the guest solvent molecules. TGA of IMU-108 after activated was carried out (green line) to further evaluate the thermal stability of IMU-108. The preliminary weight loss before 100 °C is attributed to the escape of residual solvent molecules. Further raising the temperature above 300 °C will bring about gradual weight loss that represents the decomposition of the framework. The results indicate that IMU-108 is stable up to 260 °C.





**Fig. 3** Thermogravimetric analyses of IMU-108


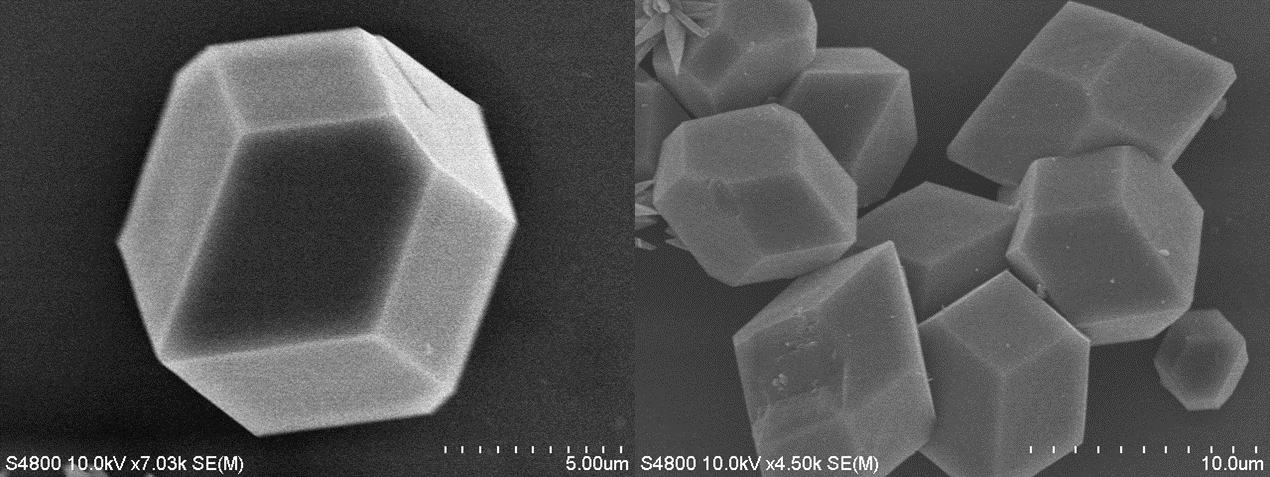


**Fig. 4** The SEM images of IMU-108 synthesized by reflux


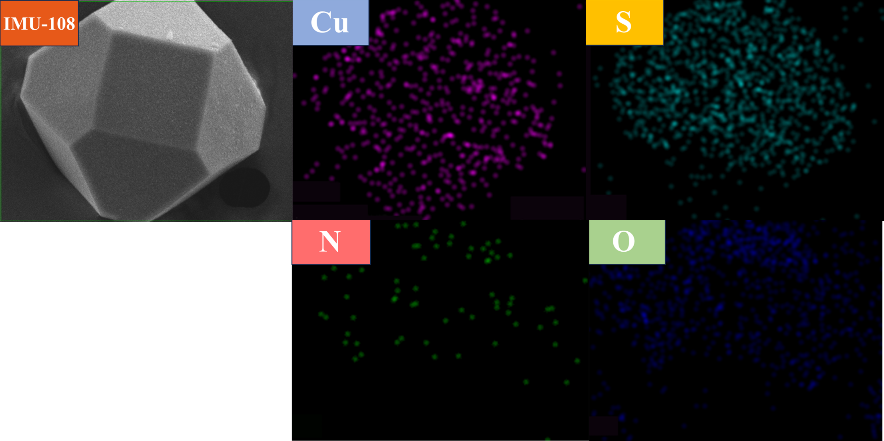


**Fig. 5** Elemental mapping images of the IMU-108

**

**

**Fig. 6** PXRD patterns of IMU-108


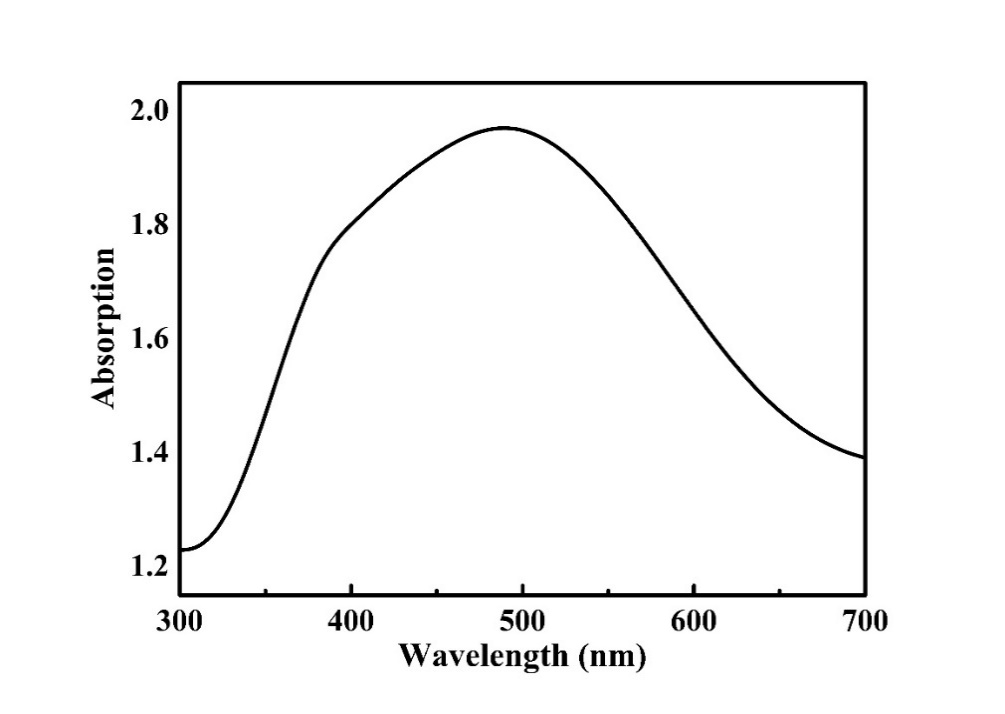


**Fig. 7** Solid state UV-Vis absorption spectrum of IMU-108

## 3.2 Solid state cyclic voltammetry of IMU-108

Solid state cyclic voltammetry (CV) was measured on CHI 760E (Chenhua, Shanghai) electrochemical workstation with a three-electrode system. The carbon paper loaded with the catalyst IMU-108 as the working electrode, a platinum wire and Ag/AgCl electrode served as the counter electrode and reference electrode, respectively. Catalyst suspension solution were prepared via mixing 5 mg catalyst, 400 µL ethanol and 100 μL Nafion solution. Then it was sonicated for 30 mins to form a stable suspension. The obtained suspension was dropped onto the carbon paper and the catalyst loading area was 1*1 cm2 to contact with electrolyte. CV measurements was conducted in a tetrabutylammonium hexafluorophosphate solution (0.1 M, acetonitrile) with a scan rate of 100 mV s-1.





**Fig. 8** Solid state cyclic voltammetry of IMU-108

**The Methods of Calculation of the Excited-State Reduction Potential Ered*:** As an approximation, the excited-state potentials of a catalyst are related to its ground state potentials (E1/2 (CuⅡ/CuⅠ) = 0.67 V) and its free energy (zero-zero excitation energy, E0-0 = 3.42 V, the E0-0 of the IMU-108 was calculated by the solid-state UV-vis and fluorescence spectra[3] (Fig. S7).

**Ered* = E1/2 (CuII/CuI)** – **E0-0** = 0.67 V – 3.42 V = –2.75 (V *vs.* Ag/AgCl)

## 3.3 Photoelectrochemical measurements of IMU-108

Photoelectrochemical measurements were performed on a CHI 760E (Chenhua, Shanghai) electrochemical workstation using a standard three-electrode system with tetrabutylammonium hexafluorophosphate acetonitrile solution (0.05 M) as the electrolyte. Ag/AgCl and platinum flake were used as reference electrode and counter electrode, respectively. The carbon paper loaded with the catalyst IMU-108 as the working electrode. Catalyst stable suspension solution were prepared via mixing 5 mg catalyst, 400 µL ethanol and 100 μL Nafion solution. Then it was sonicated for 30 mins to form the stable suspension solution. The obtained stable suspension solution was dropped onto the surface of the carbon paper and the catalyst loading area was 1*1 cm2 to contact with electrolyte. Added IMU-108 (3 mol%), dtbpy (20 mol%), *p*-*tert*-butylstyrene (0.1 mmol), *p*-fluorophenylboronic acid (2.5 equiv.), methyl 2-bromoisobutyrate (2.0 equiv.), Et2NH (0.5 equiv.), Cs2CO3 (2.0 equiv.) in a 50ml beaker with 0.05M electrolyte. The photocurrent responses were measured at room temperature under the irradiation of a 427 nm LED lamp.The photocurrent responses were measured at room temperature under the irradiation of a 427 nm LED lamp.





**Fig. 9** Photoelectrochemical measurements of IMU-108 (red), HKUST-1 (black), H25-mbdc (blue), Cu(NO3)2·3H2O (pink)

# 4 Preparation of substrates

**Scheme 1.** Commercially available substrates

**Scheme 2.** Preparation of styrene derivative substrates

***Note****:* Substrates **1i**[4], **1j**[5], **1k**[6], **1l**[7], **1m**[8], **1n**[9], **1o**[10], **1p**[11], **1q**[12], **1r**[13], **1s**[14], **1t**[15] were prepared according to the literature.

**Scheme 3.** Preparation of α-carbonyl alkyl bromides substrates

***Note****:* Substrates **2b**[16], **2c**[17], **2d**[18], **2e**[19], **2g**[20] were prepared according to the literature. Other substrates are prepared from commercially available compounds, described in the following section.

**Preparation of α-carbonyl alkyl bromides substrates**

In a 50 mL round bottom flask with a magnetic stir bar, alcohol (1.0 equiv., 5 mmol) were added and dissolved in DCM (12.5 mL, 0.4 M). Subsequently, Et3N (1.4 equiv., 1.0 mL) was added at room temperature, the above compounds were stirred for 15 mins and then cooled down to 0°C. 2-Bromoisobutyryl bromide (1.3 equiv., 0.81 mL) was added dropwise at low temperature. The progress of the reaction was monitored by TLC and when the reaction was completed, quenched by the addition of water, after which it was extracted with DCM, washed with saturated saline and dried with anhydrous sodium sulfate. The filtrate was concentrated in vacuum to give the crude products. The crude mixture was purified by silica gel column chromatography and the corresponding pure products were obtained using petroleum ether : ethyl acetate mixture as eluent.

**Compound 2f**

Following the above methods, the product was isolated by flash chromatography (Petroleum ether/EtOAc = 30:1) as a white solid (342 mg, 18% yield).

R*f* = 0.5 (Petroleum ether/EtOAc = 10:1). **NMR Spectroscopy: 1H NMR (600 MHz, CDCl3)** δ 2.45 – 2.46 (m, 1H), δ 2.11 – 2.08 (m, 1H), δ 2.01 – 2.00 (m, 4H), 1.89 (s, 6H), 1.80 (t, *J* = 11.2, 9.7 Hz, 1H), δ 1.70 – 1.64 (m, 2H), 1.55 (s, 3H), 1.50 – 1.46 (m, 1H), 1.41 – 1.36 (m, 2H), 1.31 – 1.25 (m, 1H), 1.17 (s, 3H), 0.98 (s, 3H), 0.84 (d, *J* = 7.1 Hz, 3H).**13C NMR (151 MHz, CDCl3)** δ 170.3, 89.0, 58.1, 57.5, 56.8, 54.1, 43.6, 41.5, 41.4, 37.1, 33.0, 31.5, 31.1, 30.9, 28.6, 27.7, 25.4, 25.1, 15.6. **HRMS (ESI)** *m/z*: [M+Na]+ Calcd for C19H31BrO2Na+, 393.1399, found, 393.1404.

**Compound 2h**

Following the above methods, the product was isolated by flash chromatography (Petroleum ether/EtOAc= 5:1) as a white solid (831 mg, 38%).

R*f* = 0.2 (Petroleum ether/EtOAc = 5:1). **NMR Spectroscopy: 1H NMR (600 MHz, CDCl3)** δ 5.73 (s, 1H), 4.67 (t, *J* = 8.7 Hz, 1H), 2.48 – 2.33 (m, 3H), 2.29 (t, *J* = 14.5 Hz, 1H), 2.2 – 2.2 (m, 1H), 2.03 (d, *J* = 13.4 Hz, 1H), 1.93 (d, *J* = 2.3 Hz, 6H), 1.84 (t, *J* = 12.7 Hz, 2H), 1.72 (t, *J* = 13.4, 6.9 Hz, 2H), 1.60 (t, *J* = 13.5 Hz, 3H), 1.5 – 1.3 (m, 2H), 1.26 – 1.22 (m, 1H), 1.20 (d, *J* = 2.3 Hz, 3H)., 1.14 – 1.00 (m, 2H), 1.00 – 0.94 (m, 1H), 0.91 (s, 3H).**13C NMR (151 MHz, CDCl3)**δ 199.3, 171.8, 124.2, 83.9, 56.4, 53.8, 50.4, 43.1, 38.8, 36.8, 35.9, 35.6, 34.1, 32.9, 31.6, 30.9, 30.9, 27.2, 23.6, 20.7, 17.6, 12.1. **HRMS (ESI)** *m/z*: [M+Na]+ Calcd for C23H33BrO3Na+, 459.1505, found, 459.1513.

**Compound 2i**

Following the above methods, the product was isolated by flash chromatography (Petroleum ether/EtOAc = 5:1) as a white solid (1154 mg, 55% yield).

R*f* = 0.2 (Petroleum ether/EtOAc = 5:1). **NMR Spectroscopy: 1H NMR (600 MHz, CDCl3)** δ 8.36 (d, *J* = 8.8 Hz, 1H), 7.99 (s, 1H), 7.51 – 7.50 (m, 2H), 7.33 (d, *J* = 2.2 Hz, 1H), 7.22 – 7.20 (m, 1H), 6.98 (d, *J* = 8.6 Hz, 2H), 3.85 (s, 3H), 2.10 (s, 6H).**13C NMR (151 MHz, CDCl3)** δ 175.8, 169.7, 159.9, 156.8, 154.6, 152.8, 130.3, 128.2, 125.4, 123.9, 122.8, 119.0, 114.2, 110.7, 55.5, 55.0, 53.6, 30.6. **HRMS (ESI)** *m/z*: [M+Na]+ Calcd for C20H17BrO5Na+, 439.0151, found, 439.0151.

**Compound 2j**

Following the above methods, the product was isolated by flash chromatography (Petroleum ether/EtOAc= 5:1) as a white solid (923 mg, 69% yield).

R*f* = 0.2 (Petroleum ether/EtOAc = 5:1). **NMR Spectroscopy: 1H NMR (600 MHz, CDCl3)** δ 4.79 – 4.66 (m, 1H), 2.00 (s, 2H), 1.93 (s, 1H), 1.91 (s, 6H), 1.87 – 1.79 (m, 2H), 1.79 – 1.72 (m, 1H), 1.68 – 1.60 (m, 2H), 1.58 – 1.47 (m, 3H), 1.45 – 1.38 (m, 1H), 1.37 – 1.24 (m, 8H), 1.23 – 1.17 (m, 2H), 1.16 – 1.04 (m, 6H), 1.05 – 0.94 (m, 3H). 0.90 (d, *J* = 6.5 Hz, 3H), 0.89 – 0.84 (m, 6H), 0.84 (s, 3H), 0.65 (s, 3H). **13C NMR (151 MHz, CDCl3)** δ 171.2, 75.6, 56.5, 56.5, 56.4, 54.3, 44.8, 42.7, 40.1, 39.6, 36.8, 36.3, 35.9, 35.6, 33.6, 32.1, 30.8, 30.1, 28.7, 28.3, 28.1, 27.1, 24.3, 23.9, 22.8, 22.6, 21.3, 18.8, 12.3, 12.1. **HRMS (ESI)** *m/z*: [M+Na]+ Calcd for C31H53BrO2Na+, 559.3121, found, 559.3126.

# 5 Optimization of the reaction

## 5.1 Optimization of bases

**Table 2**. Optimization of bases

*a*Reaction conditions: IMU-108 (3 mol%), dtbpy (20 mol%), *p*-*tert*-butylstyrene (**1a**) (0.1 mmol), *p*-fluorophenylboronic acid (**2a**) (2.5 equiv.), methyl 2-bromoisobutyrate (**3a**) (2.0 equiv.), base (0.5 equiv.), Cs2CO3 (2.0 equiv.), DCM (0.03 M), room temperature, 20 h, 427 nm LED. Yields were determined by 19F NMR spectroscopy using trifluoromethoxy benzenes as an internal standard. Comment: Et2NH performed better than the other screened bases. dtbpy = 4,4'-di-*tert*-butyl-2,2'-bipyridine, *b*TBD = 1,5,7-Triazabicyclo [4.4.0]dec-5-ene, *c*TMEDA = *N*, *N*, *N*', *N*'-tetramethylethylenediamine, *d*DMIPA = *N*-dimethylisopropylamine.

## 5.2 Optimization of reaction time

**Table 3**. Optimization of reaction time

Reaction conditions: IMU-108 (3 mol%), dtbpy (20 mol%), *p*-*tert*-butylstyrene (**1a**) (0.1 mmol), *p*-fluorophenylboronic acid (**2a**) (2.5 equiv.), methyl 2-bromoisobutyrate (**3a**) (2.0 equiv.), Et2NH (0.5 equiv.), Cs2CO3 (2.0 equiv.), DCM (0.03 M), room temperature, 427 nm LED. Yields were determined by 19F NMR spectroscopy using trifluoromethoxy benzenes as an internal standard. Comment: 20 hours afforded the highest yield of **4a**.

## 5.3 Optimization of the reaction concentration

**Table 4**. Optimization of the reaction concentration

Reaction conditions: IMU-108 (3 mol%), dtbpy (20 mol%), *p*-*tert*-butylstyrene (**1a**) (0.1 mmol), *p*-fluorophenylboronic acid (**2a**) (2.5 equiv.), methyl 2-bromoisobutyrate (**3a**) (2.0 equiv.), Et2NH (0.5 equiv.), Cs2CO3 (2.0 equiv.), DCM, room temperature, 427 nm LED. Yields were determined by 19F NMR spectroscopy using trifluoromethoxy benzenes as an internal standard. Comment: 0.03 M gave the best yield of **4a**.

# 6 Experimental procedures and spectral data

**General procedure for the three-component reaction**

In an N2 glovebox, to a 100 mL thick-walled pressure bottle equipped with a magnetic stir bar was added IMU-108 (3.0 mmol%, 0.018 mmol, 18.0 mg), dtbpy (20.0 mmol%, 0.12 mmol, 32.2 mg), (4-fluorophenyl)boronic acid (2.5 equiv., 1.5 mmol, 208.5 mg), Cs2CO3 (2.0 equiv., 1.2 mmol, 391.0 mg) in dry DCM (18.0 mL, 0.03M), followed by styrene derivatives (1.0 equiv., 0.6 mmol), α-carbonyl alkyl bromides (2.0 equiv., 1.2 mmol), diethylamine (0.5 equiv., 0.3mmol, 31.0 µL). The reaction mixture was stirred vigorously at room temperature and exposed to 427 nm LED for 20 hours. The reaction mixture was diluted with dichloromethane (~ 50 mL) and filtered through a plug of celite®, the filter cake being further washed with dichloromethane (~ 50 mL). The filtrate was concentrated in vacuo to yield the crude products. The crude mixture was purified by column chromatography on silica gel (200~300 mesh) with hexanes : ethyl acetate mixtures as eluent.

**Methyl-4-(4-(tert-butyl)phenyl)-4-(4-fluorophenyl)-2,2-dimethylbutanoate (4a)**

General procedure was used with IMU-108 (3.0 mmol%, 0.018 mmol, 18.0 mg), dtbpy (20.0 mmol%, 0.12 mmol, 32.2 mg), (4-fluorophenyl)boronic acid(2.5 equiv., 1.5 mmol, 208.5 mg), Cs2CO3 (2.0 equiv., 1.2 mmol, 391.0 mg) in dry DCM (18.0 mL, 0.03M), followed by 1-(tert-butyl)-4-vinylbenzene (1.0 equiv., 0.6 mmol, 109.8 µL), methyl-2-bromo-2-methylpropionate (2.0 equiv., 1.2 mmol, 155.3 µL), diethylamine (0.5 equiv., 0.3 mmol, 31.0 µL). Purification by column chromatography on silica gel using hexanes and ethyl acetate (10:1 (v/v)) as eluent afforded **4a** as a colorless oil (186.1 mg, 87% yield).

R*f* = 0.4 (Hexanes /EtOAc = 10:1). **NMR Spectroscopy: 1H NMR (600 MHz, CDCl3)** δ 7.33 – 7.28 (m, 2H), 7.27 – 7.22 (m, 2H), 7.18 (d, *J* = 8.2 Hz, 2H), 6.94 – 6.97 (m, 2H), 4.01 (t, *J* = 7.0 Hz, 1H), 3.22 (s, 3H), 2.40 (d, *J* = 7.0 Hz, 2H), 1.30 (s, 9H), 1.22 (s, 3H), 1.21 (s, 3H).**13C NMR (151 MHz, CDCl3)** δ 177.5, 161.4 (d, *J* = 244.4 Hz), 149.0, 142.0, 140.9, 129.5 (d, *J* = 7.9 Hz), 127.4, 125.4, 115.2 (d, *J* = 21.0 Hz), 51.3, 46.9 (d, *J* = 45.3 Hz), 42.0, 34.4, 31.4, 26.3, 26.1. **19F NMR (470 MHz, CDCl3)** δ -117.15 – -117.20 (m, 1F). **HRMS (ESI)** *m/z*: [M+Na]+ Calcd for C23H29FO2Na+, 379.2044, found, 379.2055.

**Methyl-4-(4-fluorophenyl)-2,2-dimethyl-4-(4-(trifluoromethyl)phenyl)butanoate (4b)**

General procedure was used with IMU-108 (3.0 mmol%, 0.018 mmol, 18.0 mg), dtbpy (20.0 mmol%, 0.12 mmol, 32.2 mg),(4-fluorophenyl)boronic acid (2.5 equiv., 1.5 mmol, 208.5 mg), Cs2CO3 (2.0 equiv., 1.2 mmol, 391.0 mg) in dry DCM (18.0 mL, 0.03 M), followed by1-(trifluoromethyl)-3-vinylbenzene1.0 equiv., 0.6 mmol, 89.0 µL), methyl-2-bromo-2-methylpropionate (2.0 equiv., 1.2 mmol, 155.3 µL), diethylamine (0.5 equiv., 0.3 mmol, 31.0 µL). Purification by column chromatography on silica gel using hexanes and ethyl acetate (20:1 (v/v)) as eluent afforded **4b** as a colorless oil (205.6 mg, 93% yield).

R*f* = 0.4 (Hexanes/EtOAc = 10:1). **NMR Spectroscopy: 1H NMR (600 MHz, CDCl3)**) δ 7.51 (s, 1H), 7.43 (d, *J* = 7.8 Hz, 2H), 7.39 – 7.37 (m, 1H), 7.23 – 7.20 (m, 2H), 6.98 – 6.95 (m, 2H), 4.10 (t, *J* = 7.1 Hz, 1H), 3.24 (s, 3H), 2.43 – 2.41 (m, 2H), 1.21 (s, 6H). **13C NMR (151 MHz, CDCl3)** δ 177.3, 161.6 (d, *J* = 245.2 Hz), 146.1, 139.9 (d, *J* = 3.4 Hz), 131.5, 130.9 (q, *J* = 32.0 Hz), 129.4 (d, *J* = 7.8 Hz), 129.1, 124.9 (q, *J* = 271.8 Hz), 124.5 (q, *J* = 3.9 Hz), 123.3 (q, *J* = 3.7 Hz), 115.5 (d, *J* = 21.3 Hz), 77.2, 51.4, 47.4, 46.3, 42.1, 26.2. **19F NMR (470 MHz, CDCl3)** -116.31 – -116.36 (m, 1F), δ -62.49 (s, 3F). **HRMS (ESI)** *m/z*: [M+Na]+ Calcd for C20H20F4O2Na+, 391.1291, found, 391.1296.

**Methyl-4-(4-acetoxyphenyl)-4-(4-fluorophenyl)-2,2-dimethylbutanoate (4c)**

General procedure was used with IMU-108 (3.0 mmol%, 0.018 mmol, 18.0 mg), dtbpy (20.0 mmol%, 0.12 mmol, 32.2 mg), (4-fluorophenyl)boronic acid (2.5 equiv., 1.5 mmol, 208.5 mg), Cs2CO3 (2.0 equiv., 1.2 mmol, 391.0 mg) in dry DCM (18.0 mL, 0.03M), followed by 4-vinylphenyl acetate (1.0 equiv., 0.6 mmol, 92.4 µL), methyl-2-bromo-2-methylpropionate (2.0 equiv., 1.2 mmol, 155.3 µL), diethylamine (0.5 equiv., 0.3mmol, 31.0 µL). Purification by column chromatography on silica gel using hexanes and ethyl acetate (10:1 (v/v)) as eluent afforded **4c** as a yellow oil (219.5 mg, 96% yield).

R*f* = 0.2 (Hexanes/EtOAc = 10:1). **NMR Spectroscopy: 1H NMR (600 MHz, CDCl3)** δ 7.24 – 7.17 (m, 4H), 7.03 (s, 4H), 4.00 (t, *J* = 7.0 Hz, 1H), 3.23 (s, 3H), 2.37 (d, *J* = 7.0 Hz, 2H), 2.26 (s, 3H), 1.19 (s, 3H), 1.18 (s, 3H).**13C NMR (151 MHz, CDCl3)** δ 177.5, 169.6, 161.5 (d, *J* = 244.9 Hz), 149.1, 142.6, 140.5, 129.5 (d, *J* = 7.7 Hz), 128.8, 121.6, 115.3 (d, *J* = 21.1 Hz), 51.5, 46.9,

46.7, 42.0, 26.2, 21.2. **19F NMR (470 MHz, CDCl3)** δ -116.82 – -116.88 (m, 1F). **HRMS (ESI)** *m/z*: [M+Na]+ Calcd for C21H23FO4Na+, 381.1478, found, 381.1483.

**Methyl 4-(2-bromophenyl)-4-(4-fluorophenyl)-2,2-dimethylbutanoate (4d)**

General procedure was used with IMU-108 (3.0 mmol%, 0.018 mmol, 18.0 mg), dtbpy (20.0 mmol%, 0.12 mmol, 32.2 mg), (4-fluorophenyl)boronic acid (2.5 equiv., 1.5 mmol, 208.5 mg), Cs2CO3 (2.0 equiv., 1.2 mmol, 391.0 mg) in dry DCM (18.0 mL, 0.03M), followed by 1-bromo-2-vinylbenzene (1.0 equiv., 0.6 mmol, 75.2 µL), methyl-2-bromo-2-methylpropionate (2.0 equiv., 1.2 mmol, 155.3 µL), diethylamine (0.5 equiv., 0.3mmol, 31.0 µL). Purification by column chromatography on silica gel using hexanes and ethyl acetate (10:1 (v/v)) as eluent afforded **4d** as a yellow oil (209.3 mg, 87% yield).

R*f* = 0.6 (Hexanes/EtOAc = 10:1). **NMR Spectroscopy: 1H NMR (600 MHz, CDCl3)** δ 7.51 (d, *J* = 8.0 Hz, 1H), 7.39 (d, *J* = 7.9 Hz, 1H), 7.32 – 7.21(m, 3H), 7.03 – 6.99 (m, 1H), 6.96 – 6.83(m, 2H), 4.65 (t, *J* = 7.0 Hz, 1H), 3.27 (s, 3H), 2.37 (ddd, *J* = 50.0, 14.2, 6.9 Hz, 2H), 1.22 (s, 3H), 1.20 (s, 3H).**13C NMR (151 MHz, CDCl3)** δ 177.5, 161.5 (d, *J* = 245.1 Hz), 143.8, 139.4 (d, *J* = 3.0 Hz), 133.3, 129.7 (d, *J* = 7.9 Hz), 128.8, 127.9, 127.7, 124.9, 115.2 (d, *J* = 21.2 Hz), 51.5, 46.5, 42.2, 26.5, 25.7. **19F NMR (470 MHz, CDCl3)** δ -116.57 – -116.60 (m, 1F). **HRMS (ESI)** *m/z*: [M+Na]+ Calcd for C19H20BrFO2Na+, 401.0528, found, 401.0530.

**Methyl 4-(benzo[d][1,3]dioxol-5-yl)-4-(4-fluorophenyl)-2,2-dimethylbutanoate (4e)**

General procedure was used with IMU-108 (3.0 mmol%, 0.018 mmol, 18.0 mg), dtbpy (20.0 mmol%, 0.12 mmol, 32.2 mg), (4-fluorophenyl)boronic acid (2.5 equiv., 1.5 mmol, 208.5 mg), Cs2CO3 (2.0 equiv., 1.2 mmol, 391.0 mg) in dry DCM (18.0 mL, 0.03M), followed by 5-vinylbenzo[*d*][1,3]dioxole (1.0 equiv., 0.6 mmol, 76.0 µL), methyl-2-bromo-2-methylpropionate (2.0 equiv., 1.2 mmol, 155.3 µL), diethylamine (0.5 equiv., 0.3mmol, 31.0 µL). Purification by column chromatography on silica gel using hexanes and ethyl acetate (10:1 (v/v)) as eluent afforded **4e** as a yellow oil (152.0 mg, 69% yield).

R*f* = 0.3 (Hexanes/EtOAc = 10:1). **NMR Spectroscopy: 1H NMR (600 MHz, CDCl3)** δ 7.21 – 7.14 (m, 2H), 7.01 – 6.86 (m, 2H), 6.78 – 6.63 (m, 3H), 5.89 (d, *J* = 3.4 Hz, 2H), 3.92 (t, *J* = 7.0 Hz, 1H), 3.30 (s, 3H), 2.33 (qd, *J* = 14.1, 7.0 Hz, 2H), 1.18 (s, 3H), 1.17 (s, 3H).**13C NMR (151 MHz, CDCl3)** δ 177.6, 161.4 (d, *J* = 244.6 Hz), 147.8, 146.0, 141.0, 139.2, 129.3 (d, *J* = 7.7 Hz), 120.8, 115.3 (d, *J* = 21.2 Hz), 108.3, 108.2, 101.0, 51.5, 47.2, 46.6, 42.1, 26.3, 26.0. **19F NMR (470 MHz, CDCl3)** δ -116.95 – -117.03 (m, 1F). **HRMS (ESI)** *m/z*: [M+Na]+ Calcd for C20H21FO4Na+, 367.1322, found, 367.1314.

**Methyl-4-(4-fluorophenyl)-2,2-dimethyl-4-(4-((trimethylsilyl)ethynyl)phenyl)-butanoate (4f)**

General procedure was used with IMU-108 (3.0 mmol%, 0.018 mmol, 18.0 mg), dtbpy (20.0 mmol%, 0.12 mmol, 32.2 mg), (4-fluorophenyl)boronic acid (2.5 equiv., 1.5 mmol, 208.5 mg), Cs2CO3 (2.0 equiv., 1.2 mmol, 391.0 mg) in dry DCM (18.0 mL, 0.03M), followed by trimethyl((4-vinylphenyl)ethynyl)silane (1.0 equiv., 0.6 mmol, 132.0 µL), methyl-2-bromo-2-methylpropionate (2.0 equiv., 1.2 mmol, 155.3 µL), diethylamine (0.5 equiv., 0.3mmol, 31.0 µL). Purification by column chromatography on silica gel using hexanes and ethyl acetate (20:1 (v/v)) as eluent afforded **4f** as a yellow oil (163.5 mg, 65% yield).

R*f* = 0.5 (Hexanes/EtOAc = 10:1). **NMR Spectroscopy: 1H NMR (600 MHz, CDCl3)** (the mixture of isomers) δ 7.36 (d, *J* = 8.0 Hz, 2H), 7.18 – 7.14 (m, 4H), 6.95 – 6.91 (m, 2H), 3.99 (t, *J* = 7.1 Hz, 1H), 3.25 (s, 3H), 2.36 (d, *J* = 6.8 Hz, 2H), 1.18 (s, 3H), 1.17 (s, 3H), 0.23 (s, 9H)**13C NMR (151 MHz, CDCl3)** (the mixture of isomers) δ 177.5, 177.4, 161.4 (d, *J* = 244.6 Hz), 145.9, 145.5, 140.4, 140.3, 132.4, 132.2, 129.4 (d, *J* = 7.8 Hz), 127.9, 127.8, 121.2, 120.2, 115.4, 115.4, 115.3, 115.2, 105.0, 94.1, 83.6, 51.5, 51.5, 47.4, 47.4, 46.3, 46.2, 42.1, 26.3, 26.2, 26.1, 26.0, 0.1. **19F NMR (470 MHz, CDCl3)** (the mixture of isomers) δ -116.79 – -116.81 (m, 1F). **HRMS (ESI)** *m/z*: [M+Na]+ Calcd for C24H29SiFO2Na+, 419.1819, found, 419.1823.

**Methyl-4-(4-fluorophenyl)-2,2-dimethyl-4-(4-(4,4,5,5-tetramethyl-1,3,2-dioxaborolan-2-yl)phenyl)butanoate (4g)**

General procedure was used with IMU-108 (3.0 mmol%, 0.018 mmol, 18.0 mg), dtbpy (20.0 mmol%, 0.12 mmol, 32.2 mg), (4-fluorophenyl)boronic acid (2.5 equiv., 1.5 mmol, 208.5 mg), Cs2CO3 (2.0 equiv., 1.2 mmol, 391.0 mg) in dry DCM (18.0 mL, 0.03M), followed by 4,4,5,5-tetramethyl-2-(4-vinylphenyl)-1,3,2-dioxaborolane (1.0 equiv., 0.6 mmol, 138.0 µL), methyl-2-bromo-2-methylpropionate (2.0 equiv., 1.2 mmol, 155.3 µL), diethylamine (0.5 equiv., 0.3 mmol, 31.0 µL). Purification by column chromatography on silica gel using hexanes and ethyl acetate (20:1 (v/v)) as eluent afforded **4g** as a white solid (212.9 mg, 79% yield).

R*f* = 0.25 (Hexanes/EtOAc = 10:1). **NMR Spectroscopy: 1H NMR (600 MHz, CDCl3)** δ 7.71 (d, *J* = 7.7 Hz, 2H), 7.27 – 7.23 (m, 2H), 7.21 – 7.15 (m, 2H), 6.95 – 6.88 (m, 2H), 4.01 (t, *J* = 7.0 Hz, 1H), 3.23 (s, 3H), 2.46 – 2.32 (m, 2H), 1.31 (s, 12H), 1.17 (s, 6H)**13C NMR (151 MHz, CDCl3)** δ 177.6, 161.4 (d, *J* = 244.5 Hz), 148.4, 140.5, 140.6, 135.2, 129.4 (d, *J* = 8.0 Hz), 127.3, 115.2 (d, *J* = 21.1 Hz), 83.8, 51.5, 47.7, 46.2, 42.1, 26.6, 25.7, 25.0. **19F NMR (470 MHz, CDCl3)** δ -117.11 – -117.16 (m, 1F). **HRMS (ESI)** *m/z*: [M+Na]+ Calcd for C25H32NaFO4Na+, 449.2275, found, 449.2284.

**Methyl 4-(dibenzo[*b*,*d*]thiophen-3-yl)-4-(4-fluorophenyl)-2,2-dimethylbutanoate (4h)**

General procedure was used with IMU-108 (3.0 mmol%, 0.018 mmol, 18.0 mg), dtbpy (20.0 mmol%, 0.12 mmol, 32.2 mg), (4-fluorophenyl)boronic acid (2.5 equiv., 1.5 mmol, 208.5 mg), Cs2CO3 (2.0 equiv., 1.2 mmol, 391.0 mg) in dry DCM (18.0 mL, 0.03M), followed by 3-vinyldibenzo[*b*,*d*]thiophene (1.0 equiv., 0.6 mmol, 126.2 mg), methyl-2-bromo-2-methylpropionate (2.0 equiv., 1.2 mmol, 155.3 µL), diethylamine (0.5 equiv., 0.3mmol, 31.0 µL). Purification by column chromatography on silica gel using hexanes and ethyl acetate (20:1 (v/v)) as eluent afforded **4h** as a yellow oil (200.8 mg, 78% yield).

R*f* = 0.6 (Hexanes/EtOAc = 10:1). **NMR Spectroscopy: 1H NMR (600 MHz, CDCl3)** δ 8.18 (d, *J* = 7.0 Hz, 1H), 8.04 (s, 1H), 7.84 (d, *J* = 7.3 Hz, 1H), 7.76 (d, *J* = 8.3 Hz, 1H), 7.48 – 7.42 (m, 2H), 7.36 (d, *J* = 8.3 Hz, 1H), 7.33 – 7.26 (m, 2H), 7.09 – 6.87 (m, 2H), 4.24 (t, *J* = 7.0 Hz, 1H), 3.21 (s, 3H), 2.54 (t, *J* = 5.6 Hz, 2H), 1.27 (s, 3H), 1.26 (s, 3H). **13C NMR (151 MHz, CDCl3)** δ 177.5, 161.4 (d, *J* = 244.7 Hz), 141.5, 140.9, 140.0, 137.5, 135.8, 135.5, 129.4 (d, *J* = 7.8 Hz), 127.1, 126.8, 124.4, 123.0, 122.9, 121.7, 120.6, 115.3 (d, *J* = 21.2 Hz), 51.4, 47.5, 46.7, 42.1, 26.3, 26.1. **19F NMR (470 MHz, CDCl3)** δ -116.74 – -116.80 (m, 1F). **HRMS (ESI)** *m/z*: [M+Na]+ Calcd for C25H23SFO2Na+, 429.1300, found, 429.1306.

**Methyl-4-(4-(1H-pyrazol-1-yl)phenyl)-4-(4-fluorophenyl)-2,2-dimethylbutanoate (4i)**

General procedure was used with IMU-108 (3.0 mmol%, 0.018 mmol, 18.0 mg), dtbpy (20.0 mmol%, 0.12 mmol, 32.2 mg), (4-fluorophenyl)boronic acid (2.5 equiv., 1.5 mmol, 208.5 mg), Cs2CO3 (2.0 equiv., 1.2 mmol, 391.0 mg) in dry DCM (18.0 mL, 0.03M), followed by 1-(4-vinylphenyl)-1H-pyrazole (1.0 equiv., 0.6 mmol, 102.1 mg), methyl-2-bromo-2-methylpropionate (2.0 equiv., 1.2 mmol, 155.3 µL), diethylamine (0.5 equiv., 0.3 mmol, 31.0 µL). Purification by column chromatography on silica gel using hexanes and ethyl acetate (5:1 (v/v)) as eluent afforded **4i** as a white solid (168.1 mg, 72% yield).

R*f* = 0.3 (Hexanes/EtOAc = 5:1). **NMR Spectroscopy: 1H NMR (600 MHz, CDCl3)** δ 7.86 (d, *J* = 2.4 Hz, 1H), 7.69 (d, *J* = 1.8 Hz, 1H), 7.59 (d, *J* = 8.2 Hz, 2H), 7.31 (d, *J* = 8.3 Hz, 2H), 7.21 (dd, *J* = 8.5, 5.4 Hz, 2H), 6.97 – 6.92 (m, 2H), 6.43 – 6.42 (m, 1H), 4.05 (t, *J* = 7.0 Hz, 1H), 3.27 (s, 3H), 2.40 (d, *J* = 7.0 Hz, 2H), 1.20 (s, 6H).**13C NMR (151 MHz, CDCl3)** δ 177.5, 161.5 (d, *J* = 245.1 Hz), 143.3, 141.1, 140.6, 138.6, 129.4 (d, *J* = 7.8 Hz), 128.9, 126.7, 119.4, 115.3 (d, *J* = 21.2 Hz), 107.6, 51.5, 47.0, 46.4, 42.1, 26.3, 26.1. **19F NMR (470 MHz, CDCl3)** δ -117.69 – -117.72 (m, 1F). **HRMS (ESI)** *m/z*: [M+Na]+ Calcd for C22H23N2FO2Na+, 389.1641, found, 389.1648.

**Methyl-4-(4-fluorophenyl)-4-(6-methoxypyridin-3-yl)-2,2-dimethylbutanoate (4j)**

General procedure was used with IMU-108 (3.0 mmol%, 0.018 mmol, 18.0 mg), dtbpy (20.0 mmol%, 0.12 mmol, 32.2 mg), (4-fluorophenyl)boronic acid (2.5 equiv., 1.5 mmol, 208.5 mg), Cs2CO3 (2.0 equiv., 1.2 mmol, 391.0 mg) in dry DCM (18.0 mL, 0.03M), followed by 2-methoxy-5-vinylpyridine (1.0 equiv., 0.6 mmol, 79.5 µL), methyl-2-bromo-2-methylpropionate (2.0 equiv., 1.2 mmol, 155.3 µL), diethylamine (0.5 equiv., 0.3mmol, 31.0 µL). Purification by column chromatography on silica gel using hexanes and ethyl acetate (5:1 (v/v)) as eluent afforded **4j** as a yellow oil (150.8 mg, 78% yield).

R*f* = 0.4 (Hexanes/EtOAc = 5:1). **NMR Spectroscopy: 1H NMR (600 MHz, CDCl3)** δ 8.01 (d, *J* = 2.6 Hz, 1H), 7.40 (dd, *J* = 8.7, 2.6 Hz, 1H), 7.17 (dd, *J* = 8.4, 5.3 Hz, 2H), 6.94 – 6.91 (m, 2H), 6.63 (d, *J* = 8.6 Hz, 1H), 3.94 (t, *J* = 7.1 Hz, 1H), 3.86 (s, 3H), 3.25 (s, 3H), 2.33 (d, *J* = 7.1 Hz, 2H), 1.16 (s, 3H), 1.17 (s, 3H).**13C NMR (151 MHz, CDCl3)** δ 177.3, 162.9, 161.4 (d, *J* = 245.0 Hz), 145.7, 140.3 (d, *J* = 3.1 Hz), 138.2, 132.9, 129.2 (d, *J* = 7.8 Hz), 115.3 (d, *J* = 21.2 Hz), 110.7, 53.4, 51.5, 46.2, 44.2, 41.9, 26.2, 26.0. **19F NMR (470 MHz, CDCl3)** δ -116.59 – -116.64 (m, 1F). **HRMS (ESI)** *m/z*: [M+H]+ Calcd for C19H22NFO3H+, 332.1662, found, 332.1665.

**Methyl-4-(4-fluorophenyl)-2,2-dimethyl-4-(thiophen-2-yl)butanoate (4k)**

General procedure was used with IMU-108 (3.0 mmol%, 0.018 mmol, 18.0 mg), dtbpy (20.0 mmol%, 0.12 mmol, 32.2 mg), (4-fluorophenyl)boronic acid (2.5 equiv., 1.5 mmol, 208.5 mg), Cs2CO3 (2.0 equiv., 1.2 mmol, 391.0 mg) in dry DCM (18.0 mL, 0.03M), followed by 2-vinylthiophene (1.0 equiv., 0.6 mmol, 63.0 µL), methyl-2-bromo-2-methylpropionate (2.0 equiv., 1.2 mmol, 155.3 µL), diethylamine (0.5 equiv., 0.3mmol, 31.0 µL). Purification by column chromatography on silica gel using hexanes and ethyl acetate (50:1 (v/v)) as eluent afforded **4k** as a yellow oil (142.2 mg, 72% yield).

R*f* = 0.4 (Hexanes/EtOAc = 10:1). **NMR Spectroscopy: 1H NMR (600 MHz, CDCl3)** δ 7.30 – 7.25 (m, 2H), 7.15 (d, *J* = 5.1 Hz, 1H), 7.04 – 6.97 (m, 2H), 6.94 – 6.88 (m, 1H), 6.82 (d, *J* = 3.5 Hz, 1H), 4.29 (dd, *J* = 8.1, 5.6 Hz, 1H), 3.34 (s, 3H), 2.45 (ddd, *J* = 54.8, 14.2, 7.0 Hz, 2H), 1.25 (s, 3H), 1.21 (s, 3H).**13C NMR (151 MHz, CDCl3)** δ 177.4, 161.6 (d, *J* = 244.9 Hz), 149.8, 140.0 (d, *J* = 3.2 Hz), 129.6 (d, *J* = 8.0 Hz), 126.6, 123.8, 123.8, 115.3 (d, *J* = 21.2 Hz), 51.5, 48.0, 43.0, 42.0, 26.8, 25.2. **19F NMR (470 MHz, CDCl3)** δ -116.20 – -116.23 (m, 1F). **HRMS (ESI)** *m/z*: [M+Na]+ Calcd for C17H19SFO2Na+, 329.0987, found, 329.0994.

**Phenyl-4-(4-fluorophenyl)-2,2-dimethyl-4-phenylbutanoate (4l)**

General procedure was used with IMU-108 (3.0 mmol%, 0.018 mmol, 18.0 mg), dtbpy (20.0 mmol%, 0.12 mmol, 32.2 mg), (4-fluorophenyl)boronic acid(2.5 equiv., 1.5 mmol, 208.5 mg), Cs2CO3 (2.0 equiv., 1.2 mmol, 391.0 mg) in dry DCM (18.0 mL, 0.03 M), followed by styrene(1.0 equiv., 0.6 mmol, 69.3 µL), phenyl-2-bromo-2-methylpropanoate (2.0 equiv., 1.2 mmol, 291 mg), diethylamine (0.5 equiv., 0.3mmol, 31.0 µL). Purification by column chromatography on silica gel using hexanes and ethyl acetate (30:1 (v/v)) as eluent afforded **4l** as a white solid (182.7 mg, 84% yield).

R*f* = 0.2 (Hexanes/EtOAc = 20:1). **NMR Spectroscopy: 1H NMR (600 MHz, CDCl3)** δ 7.34 (d, *J* = 8.0 Hz, 2H), 7.30 – 7.27 (m, 2H), 7.26 (s, 1H), 7.23 – 7.21 (m, 4H), 7.13 – 7.11 (m, 1H), 7.08 – 7.06 (m, 1H), 6.90 – 6.97 (m, 2H), 4.06 (t, *J* = 7.0 Hz, 1H), 2.52 – 2.43 (m, 2H), 1.23 (s, 3H), 1.22 (s, 3H). **13C NMR (151 MHz, CDCl3)** δ 175.2, 161.5 (d, *J* = 244.6 Hz), 145.1, 140.9, 137.8, 129.4 (d, *J* = 8.0 Hz), 128.9, 128.8, 127.8, 126.5, 124.4, 120.1, 115.4 (d, *J* = 21.2 Hz), 48.0, 47.1, 43.6, 27.0, 26.4. **19F NMR (470 MHz, CDCl3)** δ -117.02 – -117.07 (m, 1F). **HRMS (ESI)** *m/z*: [M+Na]+ Calcd for C24H23FO2Na+, 385.1574, found, 385.1577.

**Adamantan-1-yl 4-(4-fluorophenyl)-2,2-dimethyl-4-phenylbutanoate (4m)**

General procedure was used with IMU-108 (3.0 mmol%, 0.018 mmol, 18.0 mg), dtbpy (20.0 mmol%, 0.12 mmol, 32.2 mg), (4-fluorophenyl)boronic acid (2.5 equiv., 1.5 mmol, 208.5 mg), Cs2CO3 (2.0 equiv., 1.2 mmol, 391.0 mg) in dry DCM (18.0 mL, 0.03 M), followed by styrene (1.0 equiv., 0.6 mmol, 69.3 µL), compound **2c** (2.0 equiv., 1.2 mmol, 361.8 mg), diethylamine (0.5 equiv., 0.3mmol, 31.0 µL). Purification by column chromatography on silica gel using hexanes and ethyl acetate (20:1 (v/v)) as eluent afforded **4m** as a colorless oil (247.3 mg, 98% yield).

R*f* = 0.4 (Hexanes/EtOAc = 10:1). **Spectroscopy: 1H NMR (600 MHz, CDCl3)** 7.29 – 7.27 (m, 3H), 7.26 – 7.24 (m, 3H), 7.18-7.15 (m, 1H), 6.97 – 6.94 (m, 2H), 4.03 (t, *J* = 6.6 Hz, 1H), 2.38 (d, *J* = 6.7 Hz, 2H), 2.15 (s, 3H), 2.03 (s, 3H), 2.03 (s, 3H), 1.68 – 1.64 (m, 6H), 1.05 (s, 3H), 1.05 (s, 3H). **13C NMR (151 MHz, CDCl3)**δ 176.5, 161.3 (d, *J* = 244.1 Hz), 145.7, 141.5, 129.2 (d, *J* = 7.7 Hz), 128.5, 127.7, 126.1, 115.2 (d, *J* = 21.1 Hz), 80.0, 48.0, 46.2, 43.4, 41.2, 36.2, 30.8, 26.4, 26.1. **19F NMR (470 MHz, CDCl3)** δ -117.38 – -117.40 (m, 1F). **HRMS (ESI)** *m/z*: [M+Na]+ Calcd for C28H33FO2Na+, 443.2357, found, 443.2368.

**4-(4-Fluorophenyl)-2,2-dimethyl-*N*, 4-diphenylbutanamide (4n)**

General procedure was used with IMU-108 (3.0 mmol%, 0.018 mmol, 18.0 mg), dtbpy (20.0 mmol%, 0.12 mmol, 32.2 mg), (4-fluorophenyl)boronic acid (2.5 equiv., 1.5 mmol, 208.5 mg), Cs2CO3 (2.0 equiv., 1.2 mmol, 391.0 mg) in dry DCM (18.0 mL, 0.03 M), followed by styrene (1.0 equiv., 0.6 mmol, 69.3 µL), compound **2d** (2.0 equiv., 1.2 mmol, 291 mg), diethylamine (0.5 equiv., 0.3 mmol, 31.0 µL). Purification by column chromatography on silica gel using hexanes and ethyl acetate (10:1 (v/v)) as eluent afforded **4n** as a colorless oil (182.2 mg, 84% yield).

R*f* = 0.5 (Hexanes/EtOAc = 10:1). **Spectroscopy: 1H NMR (600 MHz, CDCl3)** δ 7.34 (d, *J* = 8.0 Hz, 2H), 7.30 – 7.27 (m, 2H), 7.26 – 7.24 (m, 2H), 7.23 – 7.21 (m, 4H), 7.13 – 7.09 (m, 1H), 7.08 – 7.07 (m, 1H), 6.90 – 6.87 (m, 2H), 4.06 (t, *J* = 7.0 Hz, 1H), 2.52 – 2.43 (m, 2H), 1.23 (s, 3H), 1.22 (s, 3H).**13C NMR (151 MHz, CDCl3)**δ 175.2, 161.4 (d, *J* = 244.4 Hz), 145.1, 140.9, 137.8, 129.4 (d, *J* = 7.8 Hz), 128.9, 128.7, 127.8, 126.5, 124.4, 120.1, 115.4 (d, *J* = 21.2 Hz), 48.0, 47.0, 43.5, 27.0, 26.4. **19F NMR (470 MHz, CDCl3)** δ -117.00 – -117.07 (m, 1F). **HRMS (ESI)** *m/z*: [M+Na]+ Calcd for C24H24FNONa+, 384.1734, found, 384.1748.

**Methyl-4-(1-(4-fluorophenyl)-4-methoxy-3,3-dimethyl-4-oxobutyl) benzoate (4o)**

General procedure was used with IMU-108 (3.0 mmol%, 0.018 mmol, 18.0 mg), dtbpy (20.0 mmol%, 0.12 mmol, 32.2 mg),(4-(methoxycarbonyl)phenyl)boronic acid (2.5 equiv., 1.5 mmol, 270 mg), Cs2CO3 (2.0 equiv., 1.2 mmol, 391.0 mg) in dry DCM (18.0 mL, 0.03 M), followed by 1-fluoro-4-vinylbenzene (1.0 equiv., 0.6 mmol, 72 µL), methyl-2-bromo-2-methylpropionate (2.0 equiv., 1.2 mmol, 155.3 µL), diethylamine (0.5 equiv., 0.3 mmol, 31.0 µL). Purification by column chromatography on silica gel using hexanes and ethyl acetate (20:1 (v/v)) as eluent afforded **4o** as a colorless oil (146.2 mg, 68% yield).

R*f* = 0.4 (Hexanes/EtOAc = 10:1). **NMR Spectroscopy: 1H NMR (600 MHz, CDCl3)** δ 7.93 (d, *J* = 8.0 Hz, 2H), 7.30 (d, *J* = 8.0 Hz, 2H), 7.20 – 7.18 (m, 2H), 6.95 – 6.92 (m, 2H), 4.06 (t, *J* = 7.0 Hz, 1H), 3.87 (s, 3H), 3.24 (s, 3H), 2.39 (d, *J* = 6.9 Hz, 2H), 1.18 (s, 6H). **13C NMR (151 MHz, CDCl3)** δ 177.4, 167.0, 161.5 (d, *J* = 245.3 Hz), 150.3, 140.0, 129.9, 129.4 (d, *J* = 7.8 Hz), 128.3, 127.9, 115.4 (d, *J* = 21.2 Hz), 52.1, 51.5, 47.5, 46.1, 42.1, 26.2, 26.0. **19F NMR (470 MHz, CDCl3)** δ -116.48 – -116.53 (m, 1F). **HRMS (ESI)** *m/z*: [M+Na]+ Calcd for C21H23FO4Na+, 381.1472, found, 381.1476.

**Methyl-4-(4-fluorophenyl)-4-(4-methoxyphenyl)-2,2-dimethylbutanoate (4p)**

General procedure was used with IMU-108 (3.0 mmol%, 0.018 mmol, 18.0 mg), dtbpy (20.0 mmol%, 0.12 mmol, 32.2 mg), (4-methoxyphenyl)boronic acid (2.5 equiv., 1.5 mmol, 228 mg), Cs2CO3 (2.0 equiv., 1.2 mmol, 391.0 mg) in dry DCM (18.0 mL, 0.03 M), followed by 1-fluoro-4-vinylbenzene(1.0 equiv., 0.6 mmol, 72 µL), methyl-2-bromo-2-methylpropionate(2.0 equiv., 1.2 mmol, 155.3 µL), diethylamine (0.5 equiv., 0.3 mmol, 31.0 µL). Purification by column chromatography on silica gel using hexanes and ethyl acetate (20:1 (v/v)) as eluent afforded **4p** as a colorless oil (166.5 mg, 84% yield).

R*f* = 0.4 (Hexanes/EtOAc = 10:1). **NMR Spectroscopy: 1H NMR (600 MHz, CDCl3)** δ 7.20 – 7.17 (m, 2H), 7.13 (d, *J* = 8.6 Hz, 2H), 6.94 – 6.92 (m, 2H), 6.80 (d, *J* = 8.6 Hz, 2H), 3.95 (t, *J* = 7.0 Hz, 1H), 3.75 (s, 3H), 3.25 (s, 3H), 2.35 (d, *J* = 7.0 Hz, 2H), 1.18 (s, 6H). **13C NMR (151 MHz, CDCl3)** δ 175.2, 161.5 (d, *J* = 242.7 Hz), 145.1, 140.9, 137.8, 129.4 (d, *J* = 7.8 Hz), 128.9, 128.7, 127.8, 126.5, 124.4, 120.1, 115.4 (d, *J* = 21.2 Hz), 48.0, 47.0, 43.5, 27.0, 26.4. **19F NMR (470 MHz, CDCl3)** δ -117.25 – -117.30 (m, 1F). **HRMS (ESI)** *m/z*: [M+Na]+ Calcd for C20H23FO3Na+, 353.1523, found, 353.1532.

**Methyl-4-([1,1'-biphenyl]-4-yl)-4-(4-fluorophenyl)-2,2-dimethylbutanoate (4q)**

General procedure was used with IMU-108 (3.0 mmol%, 0.018 mmol, 18.0 mg), dtbpy (20.0 mmol%, 0.12 mmol, 32.2 mg), [1,1'-biphenyl]-4-ylboronic acid (2.5 equiv., 1.5 mmol,297.1 mg), Cs2CO3 (2.0 equiv., 1.2 mmol, 391.0 mg) in dry DCM (18.0 mL, 0.03 M), followed 1-fluoro-4-vinylbenzene(1.0 equiv., 0.6 mmol, 72 µL), methyl-2-bromo-2-methylpropionate(2.0 equiv., 1.2 mmol, 155.3 µL), diethylamine (0.5 equiv., 0.3mmol, 31.0 µL). Purification by column chromatography on silica gel using hexanes and ethyl acetate (20:1 (v/v)) as eluent afforded **4q** as a colorless oil (178.4 mg, 79% yield).

R*f* = 0.4 (Hexanes/EtOAc = 10:1). **NMR Spectroscopy: 1H NMR (600 MHz, CDCl3)** δ 7.54 (d, *J* = 7.6 Hz, 2H), 7.50 (d, *J* = 7.9 Hz, 2H), 7.42 – 7.40 (m, 2H), 7.33 – 7.29 (m, 3H), 7.26 – 7.24 (m, 2H), 6.98 – 6.95 (m, 2H), 4.05 (t, *J* = 7.0 Hz, 1H), 3.24 (s, 3H), 2.43 (d, *J* = 7.0 Hz, 2H), 1.22 (s, 3H), 1.21 (s, 3H). **13C NMR (151 MHz, CDCl3)** δ 177.6, 161.5 (d, *J* = 244.6 Hz), 144.2, 140.9, 139.3, 129.5 (d, *J* = 7.9 Hz), 128.9, 128.3, 127.3, 127.1, 115.3 (d, *J* = 21.3 Hz), 51.5, 47.2, 46.6, 42.1, 26.3, 26.1. **19F NMR (470 MHz, CDCl3)** δ -117.02 – -117.07 (m, 1F). **HRMS (ESI)** *m/z*: [M+Na]+ Calcd for C25H25FO2Na+, 399.1731, found, 399.1735.

**Compound 4r**

General procedure was used with IMU-108 (3.0 mmol%, 0.018 mmol, 18.0 mg), dtbpy (20.0 mmol%, 0.12 mmol, 32.2 mg), (4-fluorophenyl)boronic acid (2.5 equiv., 1.5 mmol, 208.5 mg), Cs2CO3 (2.0 equiv., 1.2 mmol, 391.0 mg) in dry DCM (18.0 mL, 0.03M), followed by 4-vinylphenyl (*S*)-2-(4-isobutylphenyl)propanoate (1.0 equiv., 0.6 mmol, 178.3 µL), methyl-2-bromo-2-methylpropionate (2.0 equiv., 1.2 mmol, 155.3 µL), diethylamine (0.5 equiv., 0.3mmol, 31.0 µL). Purification by column chromatography on silica gel using hexanes and ethyl acetate (20:1 (v/v)) as eluent afforded **4r** as a yellow oil (230.9 mg, 73% yield).

R*f* = 0.4 (Hexanes/EtOAc = 10:1). **NMR Spectroscopy: 1H NMR (600 MHz, CDCl3)** δ 7.28 (d, *J* = 7.8 Hz, 2H), 7.21 – 7.16 (m, 4H), 7.14 (d, *J* = 7.8 Hz, 2H), 6.96 – 6.88 (m, 4H), 4.00 (t, *J* = 7.0 Hz, 1H), 3.91 (q, *J* = 7.1 Hz, 1H), 3.24 (s, 3H), 2.47 (d, *J* = 7.2 Hz, 2H), 2.41 – 2.31 (m, 2H), 1.86 (hept, *J* = 6.8 Hz, 1H), 1.59 (d, *J* = 7.2 Hz, 3H), 1.19 (s, 6H), 0.92 (s, 3H), 0.91 (s, 3H). **13C NMR (151 MHz, CDCl3)** δ 177.6, 173.4, 161.5 (d, *J* = 244.4 Hz), 149.4, 142.4, 141.0, 140.7, 137.4, 129.7, 129.5 (d, *J* = 7.7 Hz), 128.8, 127.4, 121.5, 115.4 (d, *J* = 20.9 Hz), 51.6, 47.0, 45.4, 45.3, 42.1, 30.4, 26.3, 26.2, 22.6, 18.7. **19F NMR (470 MHz, CDCl3)** δ -116.88 – -116.91 (m, 1F). **HRMS (ESI)** *m/z*: [M+Na]+ Calcd for C32H37FO4Na+, 527.2574, found, 527.2583.

**Compound 4s**

General procedure was used with IMU-108 (3.0 mmol%, 0.018 mmol, 18.0 mg), dtbpy (20.0 mmol%, 0.12 mmol, 32.2 mg), (4-fluorophenyl)boronic acid (2.5 equiv., 1.5 mmol, 208.5 mg), Cs2CO3 (2.0 equiv., 1.2 mmol, 391.0 mg) in dry DCM (18.0 mL, 0.03M), followed by compound **1o** (1.0 equiv., 0.6 mmol, 275.1 µL), methyl-2-bromo-2-methylpropionate (2.0 equiv., 1.2 mmol, 155.3 µL), diethylamine (0.5 equiv., 0.3mmol, 31.0 µL). Purification by column chromatography on silica gel using hexanes and ethyl acetate (20:1 (v/v)) as eluent afforded **4s** as a yellow oil (299.3 mg, 79% yield).

R*f* = 0.3 (Hexanes/EtOAc = 10:1). **NMR Spectroscopy: 1H NMR (600 MHz, CDCl3)** δ 7.23 (dd, *J* = 8.4, 5.4 Hz, 2H), 7.00 – 6.87 (m, 2H), 6.81 (s, 1H), 6.74 (s, 1H), 3.88 (t, *J* = 7.0 Hz, 1H), 3.24 (s, 3H), 2.72 – 2.69 (m, 2H), 2.41 (dd, *J* = 14.0, 8.0 Hz, 1H), 2.29 (dd, *J* = 14.1, 6.0 Hz, 1H), 2.13 (s, 3H), 1.83 – 1.68 (m, 2H), 1.58 – 1.50 (m, 3H), 1.50 – 1.26 (m, 12H), 1.26 – 1.15 (m, 12H), 1.11 – 1.06 (m, 3H), 0.90 (s, 3H), 0.89 (s, 3H), 0.87 (s, 3H), 0.86 (s, 3H). **13C NMR (151 MHz, CDCl3)** δ 177.7, 161.3 (d, *J* = 244.1 Hz), 150.6, 141.4, 135.4, 129.5 (d, *J* = 7.8 Hz), 127.7, 126.1, 125.9, 120.2, 115.1 (d, *J* = 20.9 Hz), 76.0, 51.3, 46.9, 46.8, 42.0, 40.4, 39.5, 37.6, 37.4, 32.9, 32.8, 31.4, 28.1, 26.6, 25.8, 24.9, 24.6, 24.4, 22.9, 22.8, 22.5, 21.1, 19.9, 19.8, 16.3. **19F NMR (470 MHz, CDCl3)** δ -117.62 – -117.65 (m, 1F). **HRMS (ESI)** *m/z*: [M+Na]+ Calcd for C40H61FO3Na+, 631.4502, found, 631.4508.

**Compound 4t**

General procedure was used with IMU-108 (3.0 mmol%, 0.018 mmol, 18.0 mg), dtbpy (20.0 mmol%, 0.12 mmol, 32.2 mg), (4-fluorophenyl)boronic acid (2.5 equiv., 1.5 mmol, 208.5 mg), Cs2CO3 (2.0 equiv., 1.2 mmol, 391.0 mg) in dry DCM (18.0 mL, 0.03 M), followed by 4-vinylphenyl 5-(2,5-dimethylphenoxy)-2,2-dimethylpentanoate (1.0 equiv., 0.6 mmol, 202.0 µL), methyl-2-bromo-2-methylpropionate (2.0 equiv., 1.2 mmol, 155.3 µL), diethylamine (0.5 equiv., 0.3mmol, 31.0 µL). Purification by column chromatography on silica gel using hexanes and ethyl acetate (10:1 (v/v)) as eluent afforded **4t** as a yellow oil (281.1 mg, 82% yield).

R*f* = 0.3 (Hexanes/EtOAc = 10:1). **NMR Spectroscopy: 1H NMR (600 MHz, CDCl3)** δ 7.27 – 7.20 (m, 4H), 7.04 (d, *J* = 7.5 Hz, 1H), 7.02 – 6.86 (m, 4H), 6.70 (d, *J* = 7.5 Hz, 1H), 6.66 (s, 1H), 4.05 (t, *J* = 7.0 Hz, 1H), 4.00 (q, *J* = 3.6, 2.6 Hz, 2H), 3.29 (s, 3H), 2.41 (dd, *J* = 7.0, 2.4 Hz, 2H), 2.34 (s, 3H), 2.21 (s, 3H), 1.90 (d, *J* = 3.0 Hz, 4H), 1.38 (s, 6H), 1.23 (s, 6H). **13C NMR (151 MHz, CDCl3)** δ 177.5, 176.4, 161.4 (d, *J* = 244.7 Hz), 157.0, 149.4, 142.3, 140.6, 136.6, 130.4, 129.4 (d, *J* = 7.8 Hz), 128.8, 123.7, 121.5, 120.9, 115.2 (d, *J* = 21.2 Hz), 112.0, 67.9, 51.5, 46.9, 46.6, 42.5, 42.0, 37.2, 26.2, 26.1, 25.4, 25.2, 21.5, 15.9. **19F NMR (470 MHz, CDCl3)** δ -116.88 – -116.90 (m, 1F). **HRMS (ESI)** *m/z*: [M+Na]+ Calcd for C34H41FO5Na+, 571.2836, found, 571.2842.

**Compound 4u**

General procedure was used with IMU-108 (3.0 mmol%, 0.018 mmol, 18.0 mg), dtbpy (20.0 mmol%, 0.12 mmol, 32.2 mg), (4-fluorophenyl)boronic acid (2.5 equiv., 1.5 mmol, 208.5 mg), Cs2CO3 (2.0 equiv., 1.2 mmol, 391.0 mg) in dry DCM (18.0 mL, 0.03M), followed by compound **1q** (1.0 equiv., 0.6 mmol, 164.4 µL), methyl-2-bromo-2-methylpropionate (2.0 equiv., 1.2 mmol, 155.3 µL), diethylamine (0.5 equiv., 0.3mmol, 31.0 µL). Purification by column chromatography on silica gel using hexanes and ethyl acetate (10:1 (v/v)) as eluent afforded **4u** as a yellow oil (246.3 mg, 86% yield).

R*f* = 0.5 (Hexanes/EtOAc = 5:1). **NMR Spectroscopy: 1H NMR (600 MHz, CDCl3)** δ 7.20 (ddd, *J* = 9.0, 5.2, 1.8 Hz, 2H), 7.10 (d, *J* = 8.3 Hz, 2H), 7.03 – 6.87 (m, 2H), 6.79 (d, *J* = 8.3 Hz, 2H), 3.99 – 3.92 (m, 2H), 3.23 (s, 3H), 2.35 (d, *J* = 7.0 Hz, 2H), 2.23 – 2.06 (m, 2H), 1.73 – 1.68 (m, 2H), 1.51 – 1.39 (m, 2H), 1.19 (d, *J* = 5.0 Hz, 6H), 1.14 – 1.03 (m, 1H), 1.00 – 0.94 (m, 1H), 0.94 – 0.87 (m, 7H), 0.75 (dd, *J* = 7.0, 3.4 Hz, 3H). **13C NMR (151 MHz, CDCl3)** δ 177.6, 161.3 (d, *J* = 244.3 Hz), 156.8, 141.2, 136.9 (d, *J* = 7.7 Hz), 129.4, 129.4, 128.8 (d, *J* = 2.9 Hz), 115.8, 115.2 (d, *J* = 21.2 Hz), 77.6, 51.4, 48.2, 46.9, 46.7, 42.0, 40.4, 34.6, 31.5, 26.2, 26.1, 23.8, 22.3, 20.9, 16.7. **19F NMR (470 MHz, CDCl3)** δ -117.30 – -117.33 (m, 1F). **HRMS (ESI)** *m/z*: [M+Na]+ Calcd for C29H39FO3Na+, 477.2781, found, 477.2787.

**Compound 4v**

General procedure was used with IMU-108 (3.0 mmol%, 0.018 mmol, 18.0 mg), dtbpy (20.0 mmol%, 0.12 mmol, 32.2 mg), (4-fluorophenyl)boronic acid (2.5 equiv., 1.5 mmol, 208.5 mg), Cs2CO3 (2.0 equiv., 1.2 mmol, 391.0 mg) in dry DCM (18.0 mL, 0.03M), followed by 4-vinylphenyl (*S*)-2-(6-methoxynaphthalen-2-yl)propanoate (1.0 equiv., 0.6 mmol, 193.3 mg), methyl-2-bromo-2-methylpropionate (2.0 equiv., 1.2 mmol, 155.3 µL), diethylamine (0.5 equiv., 0.3mmol, 31.0 µL). Purification by column chromatography on silica gel using hexanes and ethyl acetate (5:1 (v/v)) as eluent afforded **4v** as a yellow oil (267.9 mg, 81% yield).

R*f* = 0.2 (Hexanes/EtOAc = 5:1). **NMR Spectroscopy: 1H NMR (600 MHz, CDCl3)** δ 7.81 – 7.73 (m, 3H), 7.51 (dd, *J* = 8.6, 2.0 Hz, 1H), 7.24 – 7.11 (m, 6H), 6.98 – 6.91 (m, 4H), 4.09 (q, *J* = 7.1 Hz, 1H), 4.01 (t, *J* = 7.0 Hz, 1H), 3.92 (s, 3H), 3.26 (s, 3H), 2.37 (dd, *J* = 6.9, 2.2 Hz, 2H), 1.70 (d, *J* = 7.3 Hz, 3H), 1.21 (s, 6H). **13C NMR (151 MHz, CDCl3)** δ 177.3, 173.2, 161.3 (d, *J* = 244.6 Hz), 157.8, 149.2, 142.3, 140.5, 135.2, 133.9, 129.3 (d, *J* = 2.8 Hz), 129.3, 129.0, 128.7, 127.4, 126.2, 126.2, 121.3, 119.2, 115.2 (d, *J* = 21.2 Hz), 105.7, 55.3, 51.4, 46.8, 46.5, 45.6, 41.9, 26.1, 26.1, 18.6. **19F NMR (470 MHz, CDCl3)** δ -116.86 – -116.88 (m, 1F). **HRMS (ESI)** *m/z*: [M+Na]+ Calcd for C33H33FO5Na+, 551.2210, found, 551.2214.

**Compound 4w**

General procedure was used with IMU-108 (3.0 mmol%, 0.018 mmol, 18.0 mg), dtbpy (20.0 mmol%, 0.12 mmol, 32.2 mg), (4-fluorophenyl)boronic acid (2.5 equiv., 1.5 mmol, 208.5 mg), Cs2CO3 (2.0 equiv., 1.2 mmol, 391.0 mg) in dry DCM (18.0 mL, 0.03M), followed by compound **1s** (1.0 equiv., 0.6 mmol, 203.6 mg), methyl-2-bromo-2-methylpropionate (2.0 equiv., 1.2 mmol, 155.3 µL), diethylamine (0.5 equiv., 0.3mmol, 31.0 µL). Purification by column chromatography on silica gel using hexanes and ethyl acetate (5:1 (v/v)) as eluent afforded **4w** as a yellow oil (291.4 mg, 87% yield).

R*f* = 0.5 (Hexanes /EtOAc = 3:1). **NMR Spectroscopy: 1H NMR (600 MHz, CDCl3)** δ 7.44 – 7.29 (m, 5H), 7.21 – 7.16 (m, 2H), 7.13 (d, *J* = 7.7 Hz, 2H), 6.99 (d, *J* = 7.8 Hz, 2H), 6.97 – 6.85 (m, 2H), 5.19 (dd, *J* = 8.5, 3.1 Hz, 1H), 5.07 (s, 1H), 4.65 – 4.59 (m, 1H), 3.96 (t, *J* = 7.0 Hz, 1H), 3.70 (s, 3H), 3.20 (d, *J* = 2.5 Hz, 3H), 3.10 – 2.99 (m, 2H), 2.41 – 2.28 (m, 2H), 1.99 (s, 1H), 1.17 (s, 3H), 1.16 (s, 3H). **13C NMR (151 MHz, CDCl3)** δ 177.5, 172.1, 161.4 (d, *J* = 244.6 Hz), 155.7, 144.0, 140.6, 136.3, 133.7, 129.4 (d, *J* = 8.2 Hz), 128.6, 128.3, 128.2, 128.1, 115.2 (d, *J* = 20.9 Hz), 67.1, 54.8, 52.4, 51.4, 47.1, 46.5, 42.0, 37.7, 26.4, 25.9. **19F NMR (470 MHz, CDCl3)** δ -116.90 – -116.93 (m, 1F). **HRMS (ESI)** *m/z*: [M+Na]+ Calcd for C31H34NFO6Na+, 558.2268, found, 558.2271.

**Compound 4x**

General procedure was used with IMU-108 (3.0 mmol%, 0.018 mmol, 18.0 mg), dtbpy (20.0 mmol%, 0.12 mmol, 32.2 mg), (4-fluorophenyl)boronic acid (2.5 equiv., 1.5 mmol, 208.5 mg), Cs2CO3 (2.0 equiv., 1.2 mmol, 391.0 mg) in dry DCM (18.0 mL, 0.03M), followed by methyl 7-vinyl-3,4-dihydroquinolin-2(1H)-one (1.0 equiv., 0.6 mmol, 103.8 mg), methyl-2-bromo-2-methylpropionate (2.0 equiv., 1.2 mmol, 155.3 µL), diethylamine (0.5 equiv., 0.3mmol, 31.0 µL). Purification by column chromatography on silica gel using hexanes and ethyl acetate (3:1 (v/v)) as eluent afforded **4x** as a yellow oil (152.9 mg, 65% yield).

R*f* = 0.3 (Hexanes/EtOAc = 1:1). **NMR Spectroscopy: 1H NMR (600 MHz, CDCl3)** δ 7.87 (s, 1H), 7.19 (dd, *J* = 8.4, 5.4 Hz, 2H), 7.03 (d, *J* = 8.2 Hz, 1H), 7.00 (s, 1H), 6.97 – 6.91 (m, 2H), 3.93 (t, *J* = 7.0 Hz, 1H), 3.26 (s, 3H), 2.91 (t, *J* = 7.6 Hz, 2H), 2.59 (t, *J* = 7.6 Hz, 2H), 2.40 – 2.29 (m, 2H), 1.18 (s, 3H), 1.17 (s, 3H). **13C NMR (151 MHz, CDCl3)** δ 177.5, 172.0, 161.4 (d, *J* = 244.7 Hz), 140.8, 140.0, 135.7, 129.3 (d, *J* = 7.8 Hz), 127.4, 126.7, 123.8, 115.6, 115.3 (d, *J* = 21.1 Hz), 51.5, 46.9, 46.5, 42.1, 30.8, 26.3, 25.9, 25.5. **19F NMR (470 MHz, CDCl3)** δ -116.88 – -116.90 (m, 1F). **HRMS (ESI)** *m/z*: [M+Na]+ Calcd for C22H24NFO3Na+, 392.1638, found, 392.1638.

**Compound 4y**

General procedure was used with IMU-108 (3.0 mmol%, 0.018 mmol, 18.0 mg), dtbpy (20.0 mmol%, 0.12 mmol, 32.2 mg), (4-fluorophenyl)boronic acid (2.5 equiv., 1.5 mmol, 208.5 mg), Cs2CO3 (2.0 equiv., 1.2 mmol, 391.0 mg) in dry DCM (18.0 mL, 0.03M), followed by styrene (1.0 equiv., 0.6 mmol, 69.3 µL), compound **2e** (2.0 equiv., 1.2 mmol, 145.5 µL), diethylamine (0.5 equiv., 0.3 mmol, 31.0 µL). Purification by column chromatography on silica gel using hexanes and ethyl acetate (40:1 (v/v)) as eluent afforded **4y** as a colorless oil (192.7 mg, 76% yield).

R*f* = 0.4 (Hexanes /EtOAc = 20:1). **NMR Spectroscopy: 1H NMR (600 MHz, CDCl3)** (the mixture of isomers) 7.28 – 7.21 (m, 6H), 7.18 – 7.15 (m, 1H), 6.96 – 6.93 (m, 2H), 4.70 – 4.39 (m, 1H), 4.03 – 4.00 (m, 1H) 2.45 – 2.41 (m, 2H), 2.32 – 1.85 (m, 1H), 1.74 – 1.66 (m, 2H), 1.56 – 1.52 (m, 1H), 1.29 – 1.27 (m, 1H), 1.17 – 1.01 (m, 8H), 0.91 (d, *J* = 7.2 Hz, 3H), 0.85 (d, *J* = 27.9 Hz, 3H), 0.80 (s, 3H).**13C NMR (151 MHz, CDCl3)** (the mixture of isomers) δ 177.7, 176.8, 161.5 (d, *J* = 244.4 Hz), 145.7, 145.7, 145.6, 145.5, 141.5, 141.4, 141.3, 129.4 (d, *J* = 7.9 Hz) 129.4 (d, *J* = 7.9 Hz), 128.7, 128.7, 127.9, 127.9, 127.8, 127.8, 126.4, 115.3 (d, *J* = 21.1 Hz) 115.3 (d, *J* = 21.2 Hz), 81.1, 80.0, 77.2, 53.5, 49.0, 48.9, 48.0, 47.9, 47.9, 47.0, 46.3, 46.3, 46.2, 45.2, 45.1, 43.1, 42.8, 39.0, 39.0, 37.0, 37.0, 33.9, 28.2, 27.4, 27.2, 26.6, 26.5, 26.5, 26.4, 26.2, 26.1, 26.0, 26.0. 20.2, 20.1, 19.8, 19.0, 13.8, 11.6. **19F NMR (470 MHz, CDCl3)** -117.29 – -117.38 (m, 1F). **HRMS (ESI)** *m/z*: [M+Na]+ Calcd for C28H35FO2Na+, 445.2513, found, 445.2515.

**Compound 4z**

General procedure was used with IMU-108 (3.0 mmol%, 0.018 mmol, 18.0 mg), dtbpy (20.0 mmol%, 0.12 mmol, 32.2 mg), (4-fluorophenyl)boronic acid (2.5 equiv., 1.5 mmol, 208.5 mg), Cs2CO3 (2.0 equiv., 1.2 mmol, 391.0 mg) in dry DCM (18.0 mL, 0.03M), followed by styrene (1.0 equiv., 0.6 mmol, 69.3 µL), compound **2f** (2.0 equiv., 1.2 mmol, 445.6 mg), diethylamine (0.5 equiv., 0.3mmol, 31.0 µL). Purification by column chromatography on silica gel using hexanes and ethyl acetate (20:1 (v/v)) as eluent afforded **4z** as a white solid (255.6 mg, 83% yield).

R*f* = 0.5 (Hexanes/EtOAc = 20:1). **NMR Spectroscopy: 1H NMR (600 MHz, CDCl3)** δ 7.29 – 7.21 (m, 6H), 7.19 – 7.10 (m, 1H), 7.05 – 6.82 (m, 2H), 4.04 (t, *J* = 6.6 Hz, 1H), 2.44 – 2.33 (m, 3H), 2.12 – 2.07 (m, 1H), 1.96 – 1.85 (m, 2H), 1.78 (t, *J* = 8.1 Hz, 1H), 1.71 – 1.63 (m, 2H), 1.56 – 1.51 (m, 1H), 1.48 (s, 3H), 1.45 – 1.34 (m, 4H), 1.32 – 1.25 (m, 1H), 1.14 (s, 3H), 1.03 (s, 3H), 1.01 (s, 3H), 0.97 (s, 3H), 0.84 (d, *J* = 7.1 Hz, 3H). **13C NMR (151 MHz, CDCl3)** δ 176.8, 162.2 (d, *J* = 244.7 Hz), 146.0, 142.0, 129.3 (d, *J* = 7.6 Hz), 128.7, 127.9, 126.3, 115.3 (d, *J* = 21.1 Hz), 87.1, 57.8, 56.7, 54.0, 47.9, 46.0, 43.7, 43.5, 41.5, 41.3, 37.1, 33.0, 31.5, 28.7, 27.9, 26.3, 26.0, 25.6, 25.4, 15.7. **19F NMR (470 MHz, CDCl3)** δ -117.25 – -117.28 (m, 1F). **HRMS (ESI)** *m/z*: [M+Na]+ Calcd for C33H43FO2Na+, 513.3145, found, 513.3143.

**Compound 4aa**

General procedure was used with IMU-108 (3.0 mmol%, 0.018 mmol, 18.0 mg), dtbpy (20.0 mmol%, 0.12 mmol, 32.2 mg), (4-fluorophenyl)boronic acid (2.5 equiv., 1.5 mmol, 208.5 mg), Cs2CO3 (2.0 equiv., 1.2 mmol, 391.0 mg) in dry DCM (18.0 mL, 0.03M), followed by styrene (1.0 equiv., 0.6 mmol, 69.3 µL), compound **2g** (2.0 equiv., 1.2 mmol, 502.2 mg), diethylamine (0.5 equiv., 0.3 mmol, 31.0 µL). Purification by column chromatography on silica gel using hexanes and ethyl acetate (10:1 (v/v)) as eluent afforded **4aa** as a white solid (319.9 mg, 95% yield).

R*f* = 0.3 (Hexanes/EtOAc = 5:1). **NMR Spectroscopy: 1H NMR (600 MHz, CDCl3)** 7.70 – 7.65 (m, 6H), 7.61 (d, *J* = 8.6 Hz, 1H), 7.59 – 7.55 (m, 1H), 7.36 – 7.33 (m, 2H), 6.95 (d, *J* = 8.5, 2.5 Hz, 1H), 6.78 (s, 1H), 4.54 (t, *J* = 6.8 Hz, 1H), 3.27 – 3.25 (m, 2H), 3.00 – 2.88 (m, 3H), 2.80 – 2.77 (m, 1H), 2.70 – 2.64 (m, 1H), 2.57 – 2.51 (m, 1H), 2.47 – 2.35 (m, 4H), 2.04 – 1.97 (m, 2H), 1.91 – 1.89 (m, 2H), 1.85 – 1.81 (m, 1H), 1.70 (s, 3H), 1.69 (s, 3H)., 1.31 (s, 3H) **13C NMR (151 MHz, CDCl3)** δ220.9, 176.1, 161.5 (d, *J* = 244.7 Hz), 148.8, 145.4, 137.9, 137.2, 129.5 (d, *J* = 8.0 Hz), 128.8, 127.9, 126.5, 126.3, 121.5, 118.6, 115.5 (d, *J* = 21.2 Hz), 50.6, 48.1, 47.8, 46.3, 44.3, 42.9, 38.2, 36.0, 31.7, 29.5, 26.6, 26.5, 26.1, 25.9, 21.7, 14.0. **19F NMR (470 MHz, CDCl3)** δ -117.02 – -117.04 (m, 1F). **HRMS (ESI)** *m/z*: [M+Na]+ Calcd for C36H39FO3Na+, 561.2775, found, 561.2786.

**Compound 4ab**

General procedure was used with IMU-108 (3.0 mmol%, 0.018 mmol, 18.0 mg), dtbpy (20.0 mmol%, 0.12 mmol, 32.2 mg), (4-fluorophenyl)boronic acid (2.5 equiv., 1.5 mmol, 208.5 mg), Cs2CO3 (2.0 equiv., 1.2 mmol, 391.0 mg) in dry DCM (18.0 mL, 0.03M), followed by styrene (1.0 equiv., 0.6 mmol, 69.3 µL), compound **2h** (2.0 equiv., 1.2 mmol, 524.9 mg), diethylamine (0.5 equiv., 0.3mmol, 31.0 µL). Purification by column chromatography on silica gel using hexanes and ethyl acetate (5:1 (v/v)) as eluent afforded **4ab** as a yellow oil (309.3 mg, 89% yield).

R*f* = 0.4 (Hexanes/EtOAc = 5:1). **NMR Spectroscopy: 1H NMR (600 MHz, CDCl3)** δ 7.29 – 7.20 (m, 6H), 7.17 (d, *J* = 7.1 Hz, 1H), 6.99 – 6.84 (m, 2H), 5.75 (s, 1H), 4.39 (t, *J* = 8.2 Hz, 1H), 3.99 (t, *J* = 6.8 Hz, 1H), 2.47 – 2.35 (m, 5H), 2.34 – 2.28 (m, 1H), 2.15 – 2.07 (m, 1H), 2.05 (dd, *J* = 13.0, 5.3 Hz, 1H), 1.85 (dd, *J* = 12.3, 6.0 Hz, 1H), 1.75 – 1.65 (m, 3H), 1.61 – 1.56 (m, 2H), 1.39 – 1.27 (m, 4H), 1.20 (s, 3H), 1.14 – 1.10 (m, 6H), 1.07 – 1.01 (m, 2H), 0.98 – 0.94 (m, 1H), 0.78 (s, 3H). **13C NMR (151 MHz, CDCl3)** δ 199.4, 177.3, 170.9, 161.5 (d, *J* = 244.3 Hz), 145.6, 141.4, 129.4 (d, *J* = 7.9 Hz), 128.7, 127.8, 126.4, 124.1, 115.3 (d, *J* = 21.3 Hz), 82.5, 53.9, 50.4, 48.0, 46.2, 43.0, 42.8, 38.8, 37.0, 35.9, 35.6, 34.1, 32.9, 31.7, 27.6, 26.7, 26.4, 26.3, 26.0, 23.7, 20.7, 17.6, 12.2. **19F NMR (470 MHz, CDCl3)** δ -117.20 – -117.24 (m, 1F). **HRMS (ESI)** *m/z*: [M+Na]+ Calcd for C37H45FO3Na+, 579.3250, found, 579.3256.

**Compound 4ac**

General procedure was used with IMU-108 (3.0 mmol%, 0.018 mmol, 18.0 mg), dtbpy (20.0 mmol%, 0.12 mmol, 32.2 mg), (4-fluorophenyl)boronic acid (2.5 equiv., 1.5 mmol, 208.5 mg), Cs2CO3 (2.0 equiv., 1.2 mmol, 391.0 mg) in dry DCM (18.0 mL, 0.03M), followed by styrene (1.0 equiv., 0.6 mmol, 69.3 µL), compound **2i** (2.0 equiv., 1.2 mmol, 500.7 mg), diethylamine (0.5 equiv., 0.3mmol, 31.0 µL). Purification by column chromatography on silica gel using hexanes and ethyl acetate (10:1 (v/v)) as eluent afforded **4ac** as a colorless oil (267.2 mg, 83% yield).

R*f* = 0.2 (Hexanes/EtOAc = 5:1). **NMR Spectroscopy: 1H NMR (600 MHz, CDCl3)** δ 8.23 (d, *J* = 9.2 Hz, 1H), 7.97 (s, 1H), 7.50 (d, *J* = 8.4 Hz, 2H), 7.28 – 7.26 (m, 7H), 7.20 – 7.17 (m, 1H), 6.99 – 6.94 (m, 4H), 6.79 – 6.78 (m, 2H), 4.14 (t, *J* = 6.9 Hz, 1H), 3.85 (s, 3H), 2.64 – 2.54 (m, 2H), 1.37 (s, 6H).**13C NMR (151 MHz, CDCl3)**δ 175.9, 175.0, 160.4 (d, *J* =246.1 Hz), 156.7, 154.7, 152.7, 144.9, 140.9, 130.3, 129.4 (d, *J* = 8.1 Hz), 128.9 (d, *J* = 3.1 Hz), 128.0, 127.6, 126.8, 125.3, 124.1, 122.3, 119.2, 115.6 (d, *J* = 21.0 Hz), 114.2, 110.7, 55.5, 47.7, 46.3, 43.0, 26.3, 26.2. **19F NMR (470 MHz, CDCl3)** -115.87 – -115.97 (m, 1F). **HRMS (ESI)** *m/z*: [M+Na]+ Calcd for C34H29FO5Na+, 559.1891, found, 559.1902.

**Compound 4ad**

General procedure was used with IMU-108 (3.0 mmol%, 0.018 mmol, 18.0 mg), dtbpy (20.0 mmol%, 0.12 mmol, 32.2 mg), (4-fluorophenyl)boronic acid (2.5 equiv., 1.5 mmol, 208.5 mg), Cs2CO3 (2.0 equiv., 1.2 mmol, 391.0 mg) in dry DCM (18.0 mL, 0.03M), followed by styrene (1.0 equiv., 0.6 mmol, 69.3 µL), compound **2j** (2.0 equiv., 1.2 mmol, 645.2 mg), diethylamine (0.5 equiv., 0.3mmol, 31.0 µL). Purification by column chromatography on silica gel using hexanes and ethyl acetate (10:1 (v/v)) as eluent afforded **4ad** as a yellow oil (375.1 mg, 92% yield).

R*f* = 0.5 (Hexanes/EtOAc = 10:1). **NMR Spectroscopy: 1H NMR (600 MHz, CDCl3)** δ 7.27 – 7.20 (m, 6H), 7.18 – 7.12 (m, 1H), 7.03 – 6.78 (m, 2H), 4.43 – 4.34 (m, 1H), 3.99 (t, *J* = 6.7 Hz, 1H), 2.38 (dt, *J* = 5.6, 2.7 Hz, 2H), 1.97 (dt, *J* = 12.7, 3.5 Hz, 1H), 1.87 – 1.77 (m, 1H), 1.73 – 1.63 (m, 3H), 1.59 – 1.46 (m, 4H), 1.41 – 1.29 (m, 6H), 1.26 – 1.19 (m, 5H), 1.16 – 1.06 (m, 12H), 1.03 – 0.96 (m, 4H), 0.91 (d, *J* = 6.5 Hz, 3H), 0.87 (dd, *J* = 6.6, 2.8 Hz, 6H), 0.79 (s, 3H), 0.65 (s, 4H).**13C NMR (151 MHz, CDCl3)** δ 176.9, 161.4 (d, *J* = 244.4 Hz), 145.6, 141.4, 129.4 (d, *J* = 7.9 Hz), 128.6, 127.9, 126.3, 115.3 (d, *J* = 21.1 Hz). 73.9, 56.6, 56.4, 54.3, 47.9, 46.4, 44.7, 42.7, 42.6, 40.1, 39.7, 36.9, 36.3, 36.0, 35.6, 33.9, 32.2, 28.8, 28.4, 28.2, 27.4, 26.4, 26.1, 24.4, 24.0, 22.7, 21.4, 18.8, 12.4, 12.2. **19F NMR (470 MHz, CDCl3)** δ -117.15 – -117.21 (m, 1F). **HRMS (ESI)** *m/z*: [M+Na]+ Calcd for C45H65FO2Na+, 679.4866, found, 679.4868.

# 7 Mechanistic studies

## 7.1 Radical inhibition experiments

**i) Radical capture by BHT**

According to general procedure for the three-Component Coupling with the addition of BHT (44.1 mg, 0.20 mmol, 2.0 equiv.). The reaction mixture was irradiated with a 427 nm LED light and was allowed to cool after the reaction was completed. The reaction mixture was analyzed via HR-MS. Comment: the addition of BHT shut down the desired reaction and BHT-adducts were observed. **HRMS (ESI)** *m/z*: [M+Na]+ Calcd for C20H32O3Na+, 343.2243, found, 343.2253.

**ii) Radical capture with 1,1-diphenylethylene**

According to general procedure for the three-Component Coupling with the addition of 1,1-diphenylethylene (35.4 μL, 0.20 mmol, 2.0 equiv.). The reaction mixture was irradiated with a 427 nm LED light and was allowed to cool after the reaction was completed. The reaction mixture was analyzed via HR-MS. Comment: The addition of 1,1-diphenylethylene shut down the desired reaction and 1,1-diphenylethylene adducts were observed. **HRMS (ESI)** *m/z*: [M+Na]+ Calcd for C19H20O2Na+, 303.1355, found, 303.2508.

**iii) Radical capture by allyl sulfone**

According to general procedure for the three-Component Coupling with the addition of ((2-phenylallyl)sulfonyl)-benzene (48.9 mg, 0.20 mmol, 2.0 equiv.). The reaction mixture was irradiated with a 427 nm LED light and was allowed to cool after the reaction was completed. The reaction mixture was analyzed via GC-MS. Comment: the addition of ((2-phenylallyl)sulfonyl)-benzene shut down the desired reaction and ((2-phenylallyl)sulfonyl)-benzene adducts were observed.

**Fig. 10** Detection of **7** by GC-MS

## 7.2 Stern-Völmer quenching experiment

Stern-Völmer quenching experiments were carried by F-4700 fluorescence spectrophotometer. 1 mg IMU-108 was dispersed in 3 mL DCM after grinding (named 0.33 mg/mL IMU-108 suspension), after which the above mixture was ultrasonicated for 10 mins to ensure even dispersion. The fluorescence quenching test was carried out in 3 mL of 0.33 mg/mL IMU-108 suspension, adding different concentrations of Et2NH, TBAB or substrate 1a sequentially to the above suspension, and the corresponding fluorescence intensity changes were recorded. The intensity of the emission peak at 370 nm (λ ex = 298 nm) expressed as the ratio I0/I, where I0 is the emission intensity of IMU-108 at 375 nm in the absence of a quencher and I is the observed intensity, as a function of the quencher concentration was measured (Fig. S10 (a). (b). (c)). 1 mg dtbpy was dissolved in 2 mL DCM (named 0.5 mg/mL dtbpy). The fluorescence quenching test was carried out in 1.5 mL of 0.33 mg/mL IMU-108 and 1.5 mL.0.5 mg/mL dtbpy, adding different concentrations of Et2NH, TBAB or substrate 1a sequentially to the above suspension, and the corresponding fluorescence intensity changes were recorded. The intensity of the emission peak at 346 nm (λ ex = 298 nm) expressed as the ratio I0/I, where I0 is the emission intensity of IMU-108 and dtbpy at 346 nm in the absence of a quencher and I is the observed intensity, as a function of the quencher concentration was measured (Fig. S10 (d). (e). (f)).


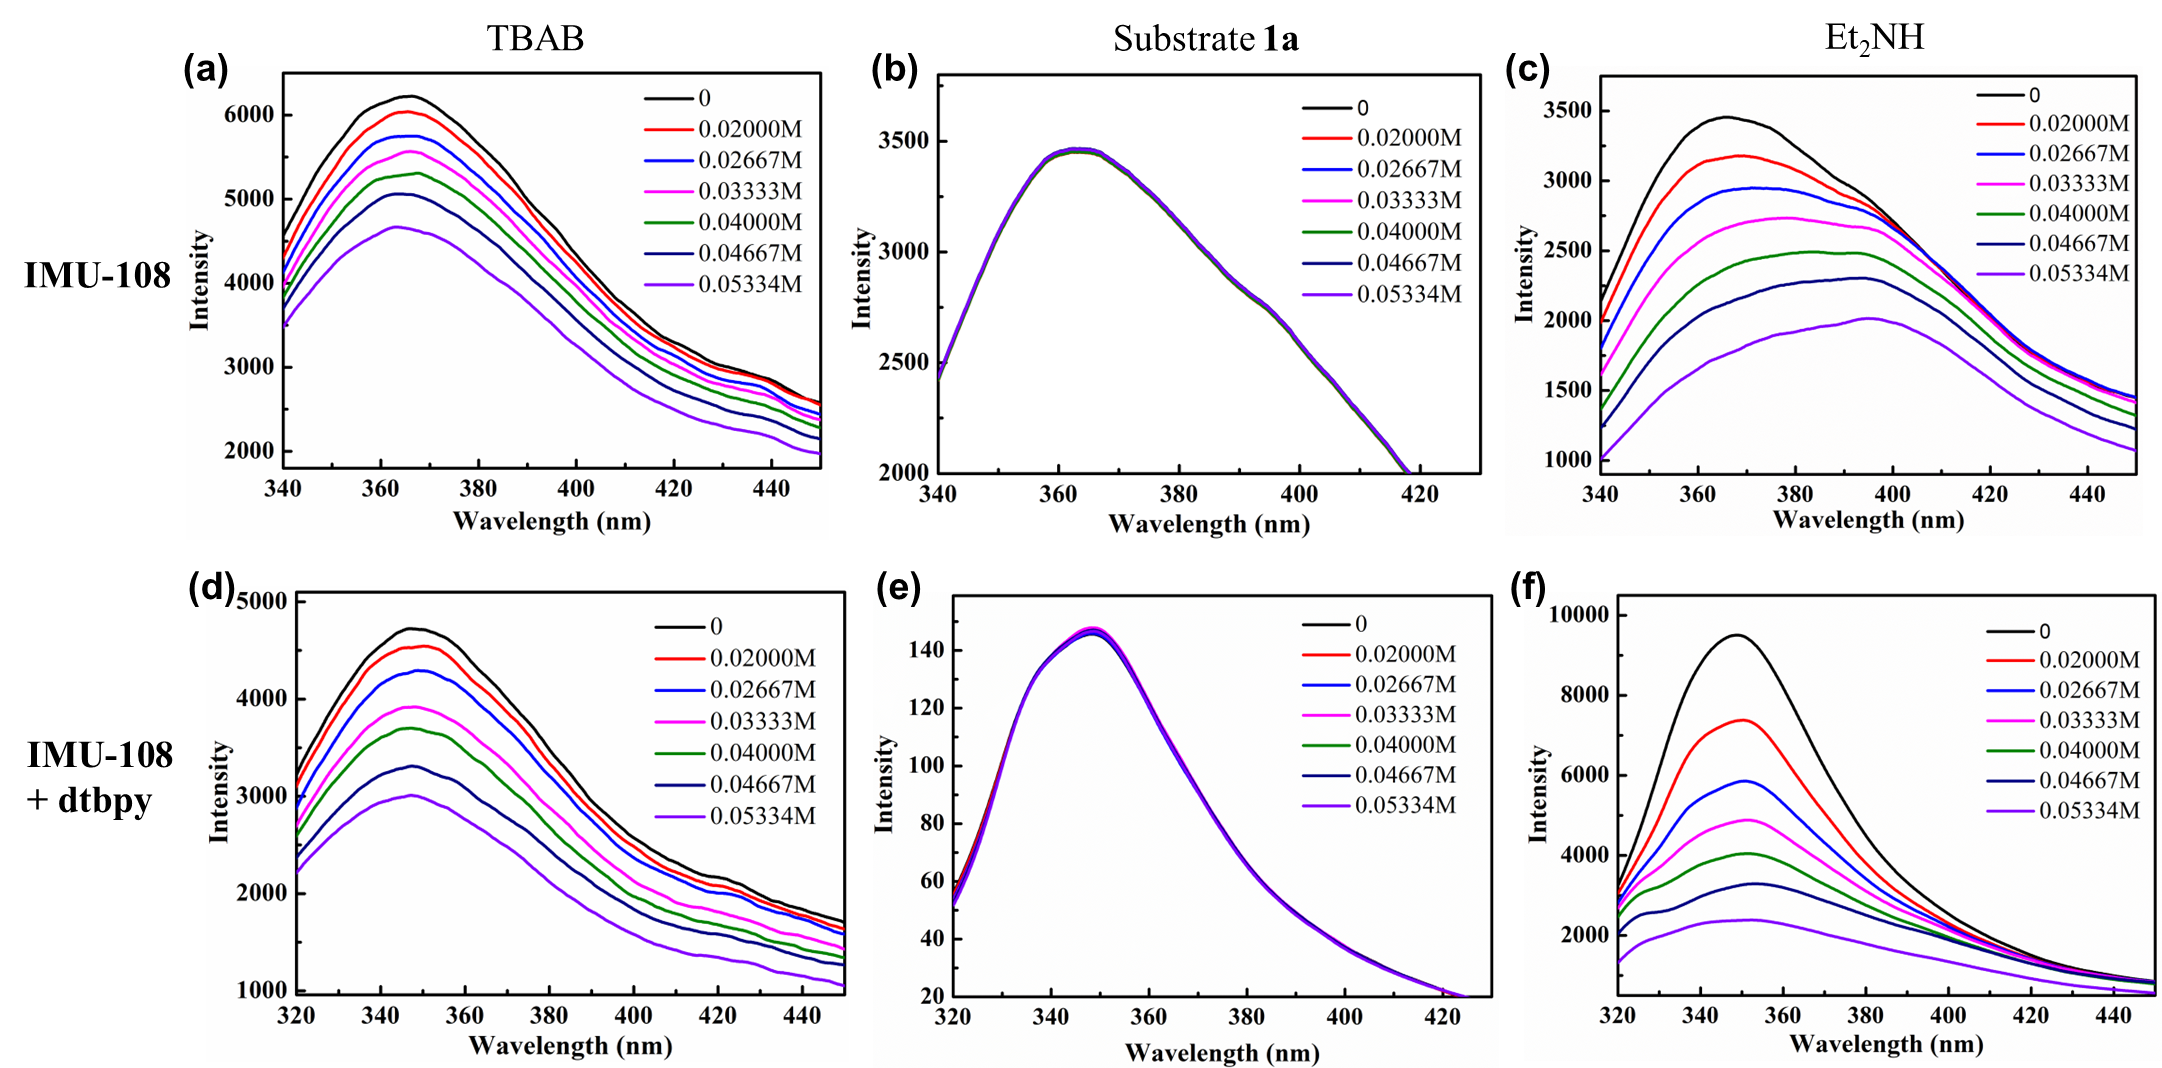


**Fig. 11** Family of luminescence spectra of IMU-108 in DCM upon addition of the different concentrations of TBAB (a), **1a** (b) and Et2NH (c). Family of luminescence spectra of IMU-108 and dtbpy in DCM upon addition of the different concentrations of TBAB (d), **1a** (e) and Et2NH (f)


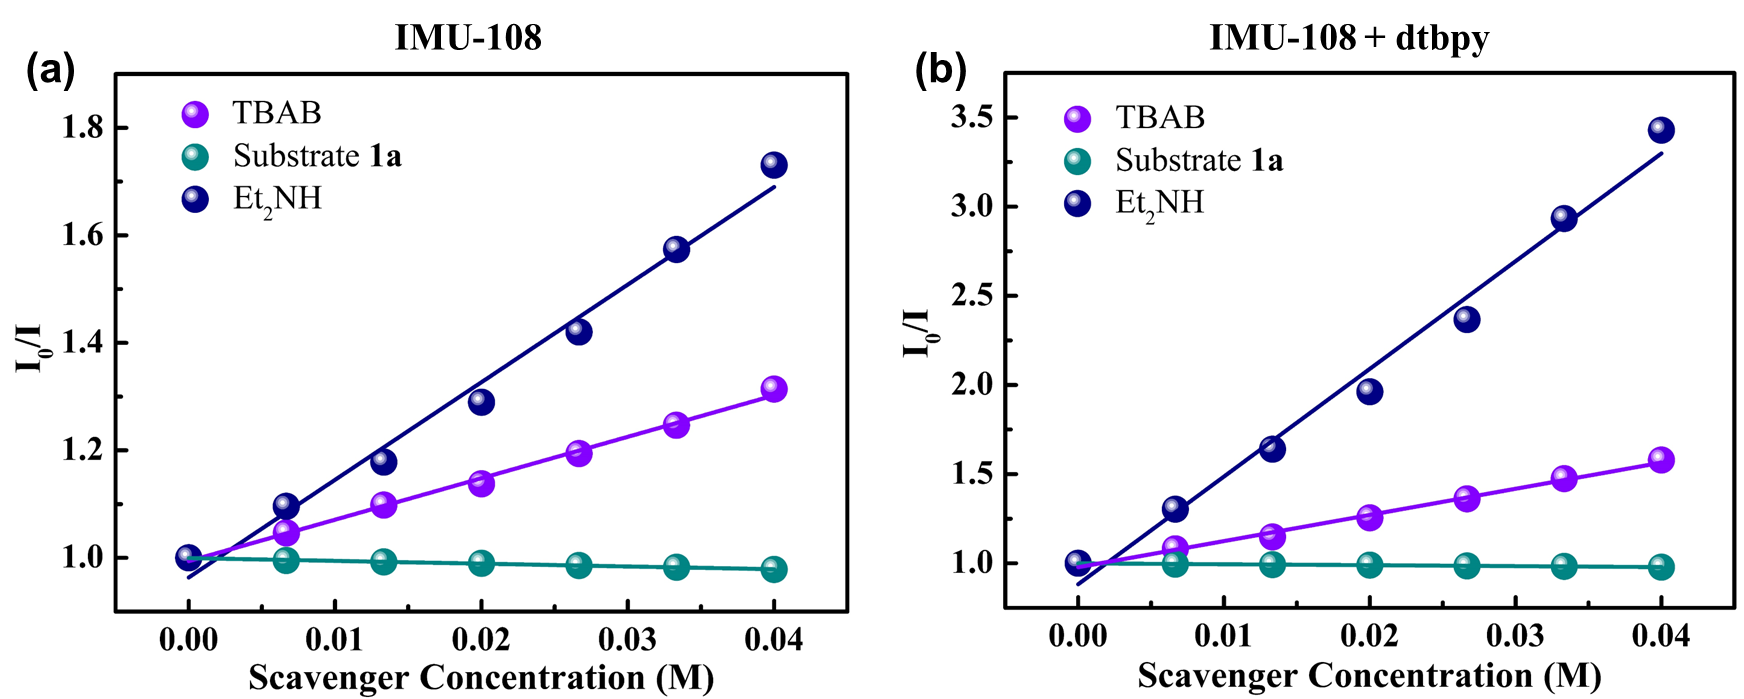


**Fig. 12** (a) The corresponding Stern-Völmer curve of IMU-108 in DCM TBAB (purple), **1a** (dark cyan) and Et2NH (navy), respectively; (b) The corresponding Stern-Völmer curve of IMU-108 and dtbpy in DCM TBAB (purple), **1a** (dark cyan) and Et2NH (navy), respectively

**Table 5**. Comparison of *K*sv between IMU-108 and IMU-108 + dtbpy

|  | *K*sv (Et2NH) (M-1) | *K*sv (TBAB) (M-1) | *K*sv (Substrate **1a**)(M-1) |
| --- | --- | --- | --- |
| **IMU-108 + dtbpy** | **60.39** | 14.66 | -0.52 |
| **IMU-108** | **18.16** | 7.71 | 3.02 |

## 7.3 Light on/off experiment

Several standard reactions according to General Procedure were parallelly set up on a 0.10 mmol scale and irradiated with 427 nm LEDs at a distance of 3 cm and/or in the absence of light. From the 10th hour, every 2 hours, one reaction was worked up and analyzed by 19F NMR to determine the yield of the corresponding products using (trifluoro-methoxy)benzenes as an internal standard. The corresponding results revealed that light is a necessary component of the reaction.


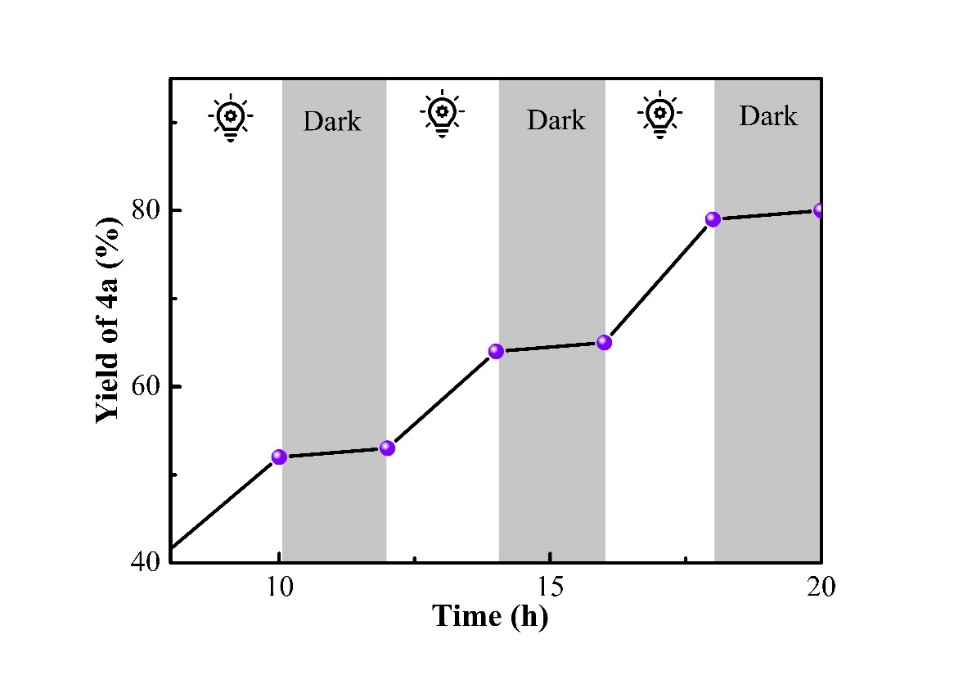


**Fig. 13** The light On/Off experiment

# 8 Stability studies of IMU-108

## 8.1 Cyclic experiments

Cycling tests were performed in two parallel light reaction vessels containing standard reactants under N2 atmosphere at room temperature for 20 h under irradiation with a 427 nm LED (standard conditions), one of the reactors contained 3 mol% of IMU-108 (Reactor A) and the other contained 60 mol% IMU-108 (Reactor B). After the reaction, (trifluoromethoxy)benzenes as an internal standard was added to the reaction solution in Reactor A and the yield was calculated by 19F NMR; the IMU-108 in Reactor B was centrifuged, washed, and dried without additional activation steps. For each subsequent cycle, IMU-108 (3 mol%) was weighed from reactor B and added to reactor A, and reactors A and B were placed under standard conditions for cycle experiments.

## 8.2 Leaching experiments

Several standard reactions according to General Procedure were parallelly set up on a 0.10 mmol scale and irradiated with 427 nm LEDs at a distance of 3 cm. The solid catalyst and the liquid phase of the reaction mixture were separated by centrifugation after a time interval of 10 h, then the supernatant solution was seated at the exactly the same reaction conditions for extra 2, 6, and 10 hours, the conversions were found to be 49, 50, and 48% respectively by 19F NMR spectral analysis. In contrast, in the presence of IMU-108, the yield reached 86% after 20 hours.


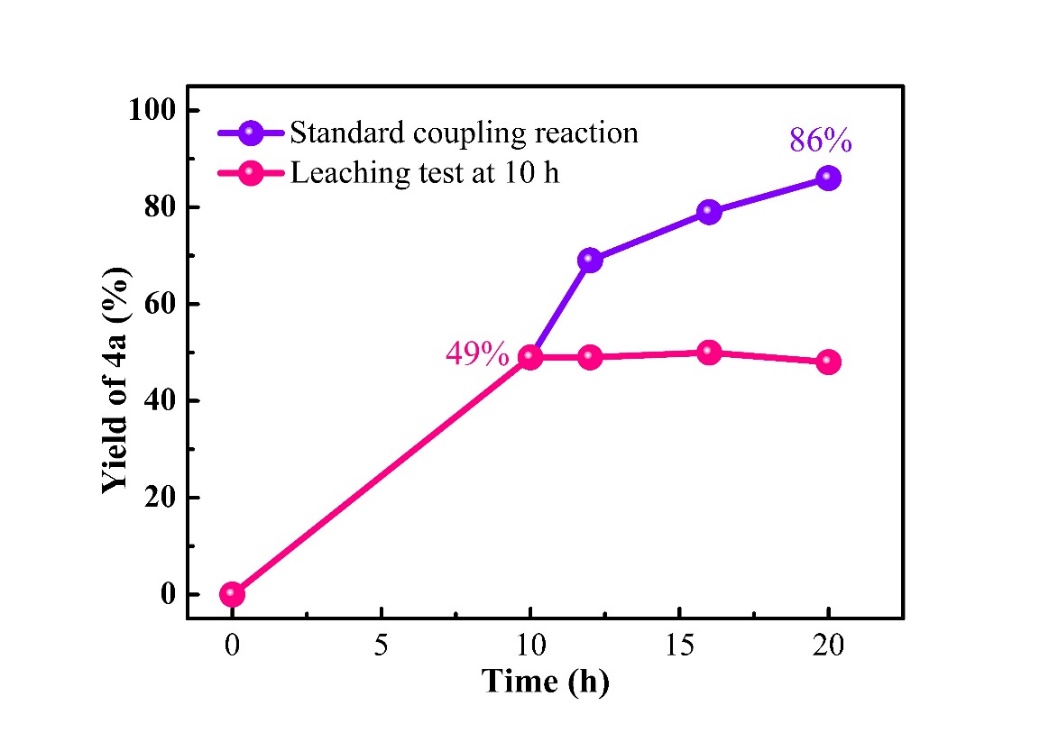


**Fig. 14** Line graph of leaching test for IMU-108 in three-component reaction mixtures at different time intervals

Several standard reactions according to General Procedure were parallelly set up on a 0.10 mmol scale and irradiated with 427 nm LEDs at a distance of 3 cm. The solid catalyst and the liquid phase of the reaction mixture were separated by centrifugation after a time interval of 10 h, then the supernatant solution was seated at the exactly the same reaction conditions for extra 5 hours, the conversions were found to be 56% by 19F NMR spectral analysis. Afterwards, the solid phase obtained by centrifugation was added to the reaction system again and subjected to additional illumination for 3 hours and 5 hours, respectively, with conversion rates of 67% and 72%.


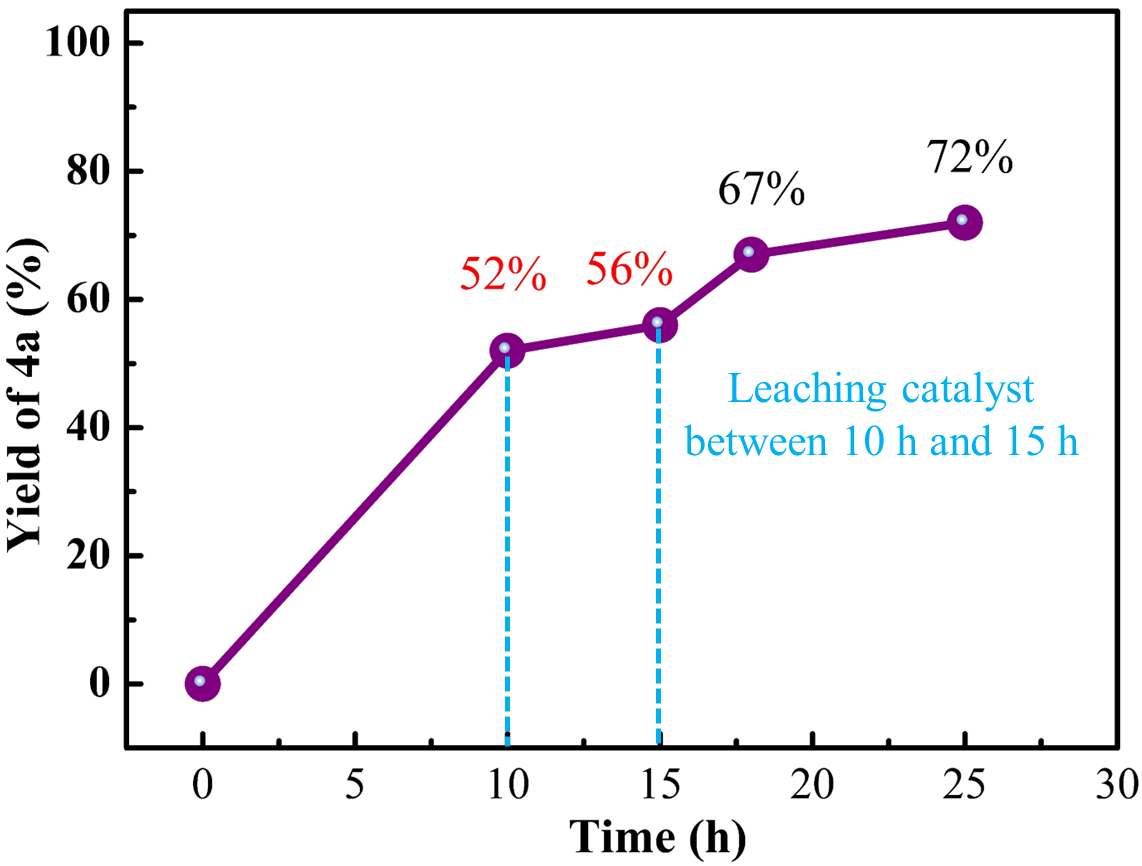


**Fig. 15** Line graph of leaching test for IMU-108 in three-component reaction mixtures at different time intervals

## 8.3 PXRD patterns of IMU-108





**Fig. 16** PXRD patterns of IMU-108 after treated under various conditions





**Fig. 17** PXRD patterns of IMU-108 after soaking in various organic solvents for three days





**Fig. 18** PXRD patterns of IMU-108 after reaction

## 8.4 The unit-cell parameters of IMU-108 before and after catalysis

**Table 6**. The unit-cell parameters of IMU-108 before and after catalysis

| **IMU-108** | Before catalysis | | After catalysis | |
| --- | --- | --- | --- | --- |
| unit-cell parameters | **1** | **2** | **1** | **2** |
| *a* [Å] | 26.566(3) | 26.699(7) | 26.43(4) | 26.61(2) |
| *b* [Å] | 26.530(5) | 26.672(6) | 26.40(4) | 26.62(2) |
| *c* [Å] | 34.077(5) | 33.576(7) | 31.54(5) | 31.40(3) |
| *α* [°] | 89.960(14) | 89.987(17) | 89.94(13) | 90.01(8) |
| *β* [°] | 89.951(12) | 89.941(19) | 89.96(12) | 89.95(8) |
| *γ* [°] | 89.971(12) | 89.840(19) | 90.06(13) | 89.99(7) |

# 9 Scale up of three-component coupling reactions

A gram-scale synthesis was achieved by mixing *p*-*tert*-butylstyrene (**1a**), *p*-fluorophenylboronic acid (**2a**), and methyl 2-bromoisobutyrate (**3a**) at a 5.0 mmol scale relative to **1a**, resulting in 1.63 g (92% isolated yield) of the corresponding 1,1-diarylalkane product **4a**. (Ar = *p*-fluorophenyl)

**Fig. 19** A gram-scale synthesis

# 10 References

[1] a) A. Dahan, A. Weissberg, M. Portnoy, *Chem. Commun.* **2003**, *10*, 1206-1207; b) T. Tsuboi, Y. Takaguchi, S. Tsuboi, *Bull. Chem. Soc. Jpn.* **2008**, *81*, 361-368.

[2] G. M. Sheldrick, **1997**.

[3] J. W. Tucker, C. R. J. Stephenson, *J. Org. Chem.* **2012**, *77*, 1617-1622.

[4] X. Y. Dong, J. T. Cheng, Y. F. Zhang, Z. L. Li, T. Y. Zhan, J. J. Chen, F. L. Wang, N. Y. Yang, L. Ye, Q. S. Gu, X. Y. Liu, *J. Am. Chem. Soc.* **2020**, *142*, 9501-9509.

[5] T. Miura, T. Nakamuro, S. G. Stewart, Y. Nagata, M. Murakami, *Angew. Chem. Int. Ed.* **2017**, *56*, 3334-3338.

[6] M. Koy, P. Bellotti, F. Katzenburg, C. G. Daniliuc, F. Glorius, *Angew. Chem. Int. Ed.* **2020**, *59*, 2375-2379.

[7] N. L. Frye, A. Bhunia, A. Studer, *Org. Lett.* **2020**, *22*, 4456-4460.

[8] H. Cao, H. Jiang, H. Feng, J. M. C. Kwan, X. Liu, J. Wu, *J. Am. Chem. Soc.* **2018**, *140*, 16360-16367.

[9] J. Liu, S. Wu, J. Yu, C. Lu, Z. Wu, X. Wu, X. S. Xue, C. Zhu, *Angew. Chem. Int. Ed.* **2020**, *59*, 8195-8202.

[10] G. S. Lee, D. Kim, S. H. Hong, *Nat. Commun.* **2021**, *12*, 991-1002.

[11] W. Xiao, L. Ning, S. Xin, S. Dong, X. Liu, X. Feng, *Angew. Chem. Int. Ed.* **2022**, *61*, e202211596.

[12] W. Yu, S. Wang, M. He, Z. Jiang, Y. Yu, J. Lan, J. Luo, P. Wang, X. Qi, T. Wang, A. Lei, *Angew. Chem. Int. Ed.* **2023**, *62*, e202219166.

[13] C. Wu, X. Hui, D. Zhang, M. Zhang, Y. Zhu, S. Wang, *Green Chem.* **2022**, *24*, 1103-1108.

[14] B. N. Bhawal, J. C. Reisenbauer, C. Ehinger, B. Morandi, *J. Am. Chem. Soc.* **2020**, *142*, 10914-10920.

[15] J. Li, Z. Guo, X. Zhang, X. Meng, Z. Dai, M. Gao, S. Guo, P. Tang, *Green Chem.* **2023**, *25*, 9292-9300.

[16] X. Ren, C. Shen, G. Wang, Z. Shi, X. Tian, K. Dong, *Org. Lett.* **2021**, *23*, 2527-2532.

[17] C. Feng, Y. Zhu, Z. Liu, F. Yang, Y. Wu, *Org. Chem. Front.* **2023**, *10*, 2517-2525.

[18] J. A. Leitch, C. L. McMullin, A. J. Paterson, M. F. Mahon, Y. Bhonoah, C. G. Frost, *Angew. Chem. Int. Ed.* **2017**, *56*, 15131-15135.

[19] X. Lv, Y. Cheng, Y. Zong, Q. Wang, G. An, J. Wang, G. Li, *ACS. Catal.* **2023**, *13*, 7310-7321.

[20] P. Gandeepan, J. Koeller, K. Korvorapun, J. Mohr, L. Ackermann, *Angew. Chem. Int. Ed.* **2019**, *58*, 9820-9825.

# 11 1H NMR, 13C NMR and 19F NMR Spectra


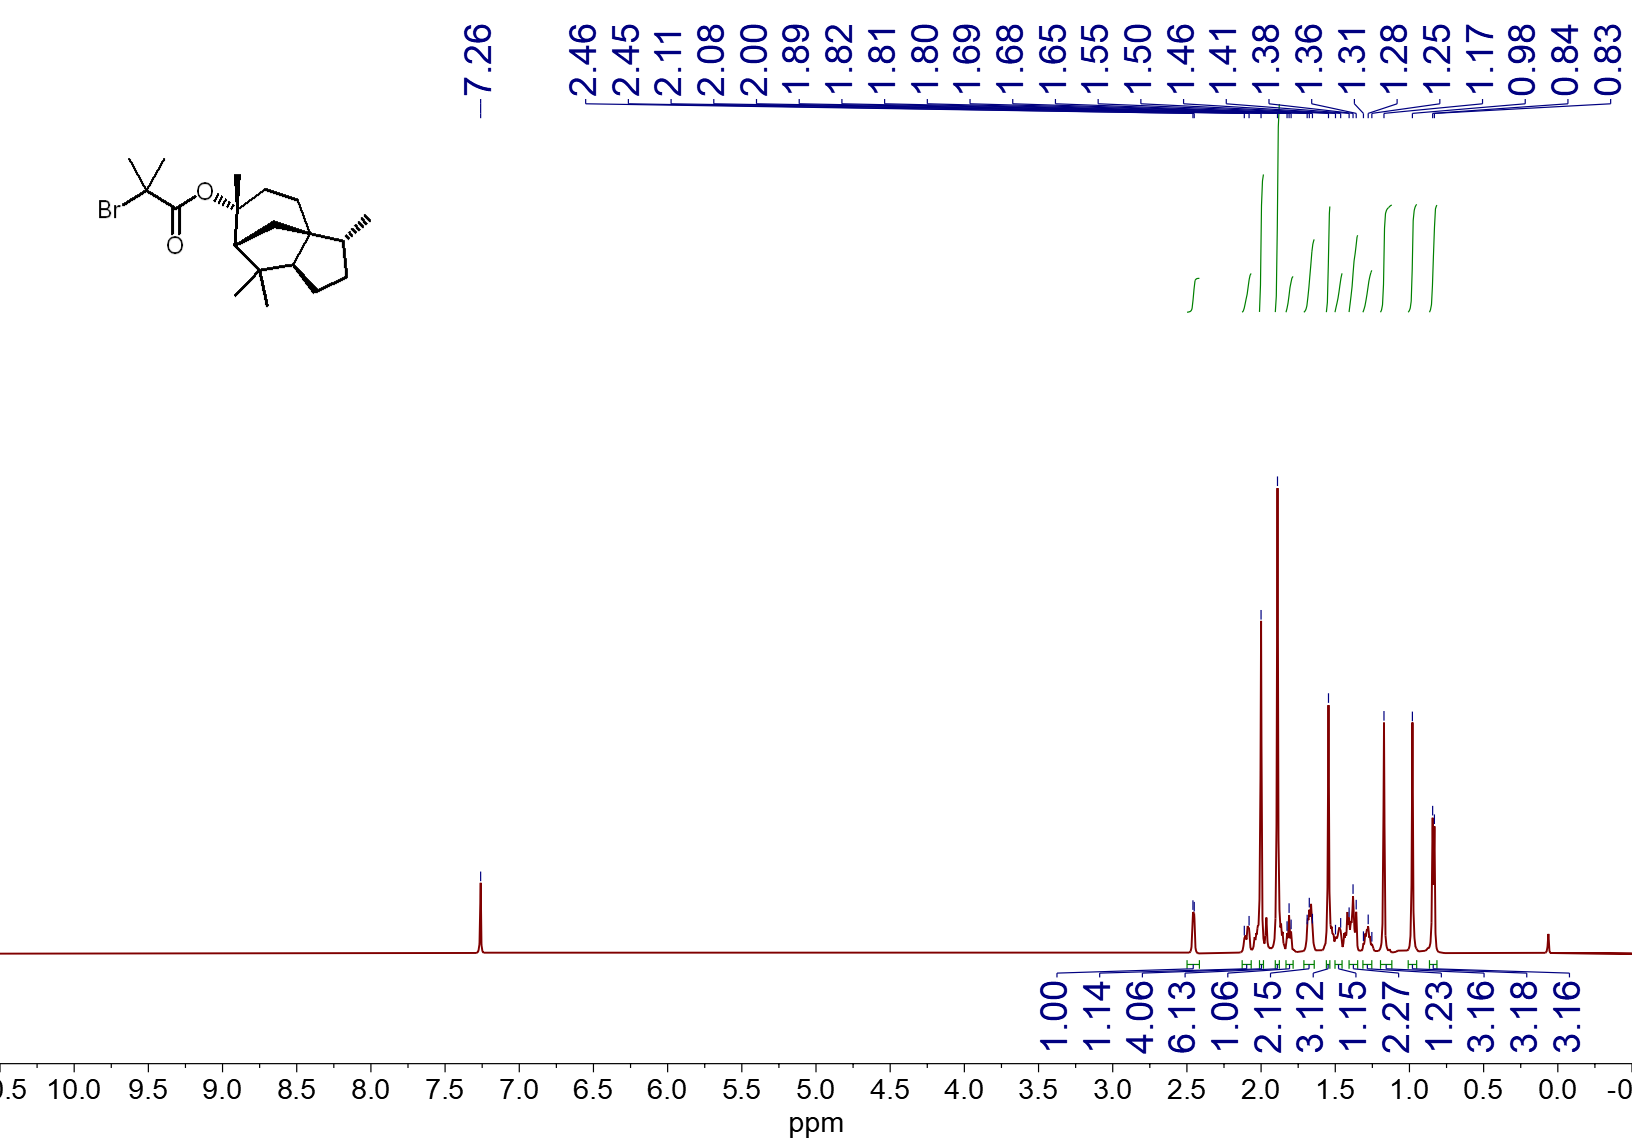


1H NMR spectrum (600 MHz, CDCl3, 23 ºC) of **2f**


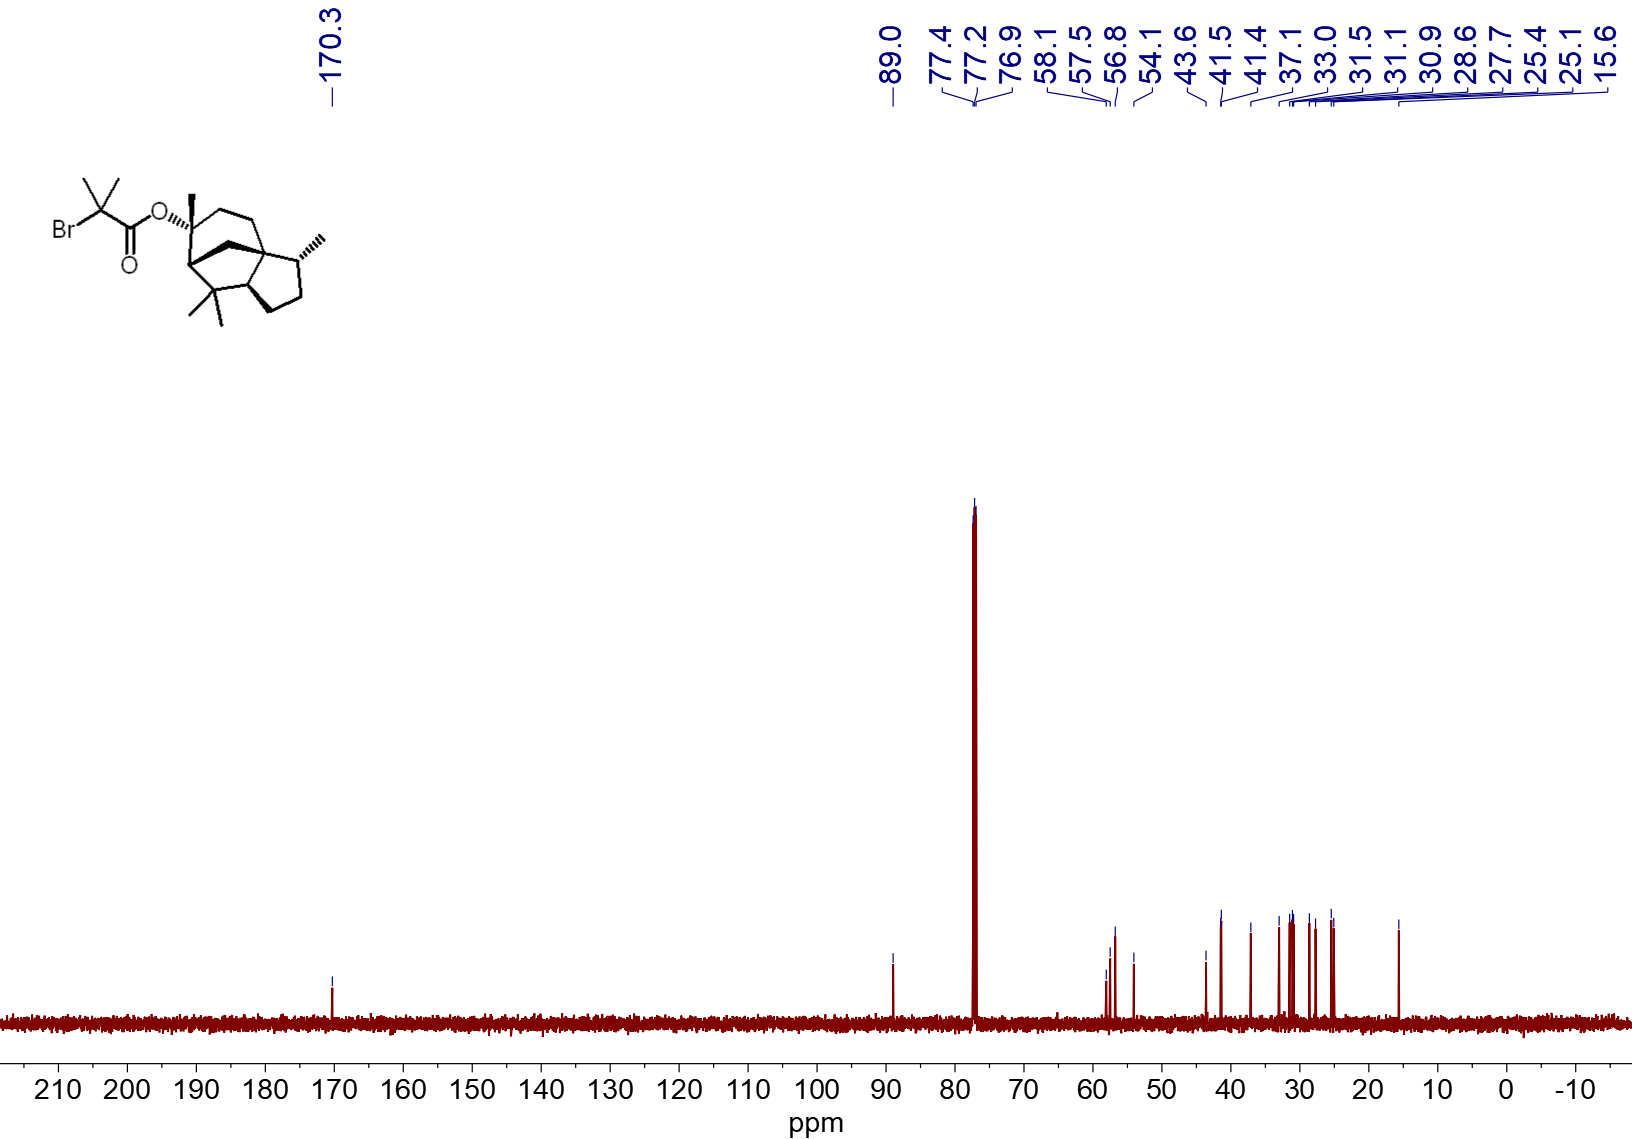


13C NMR spectrum (151 MHz, CDCl3, 23 ºC) of **2f**


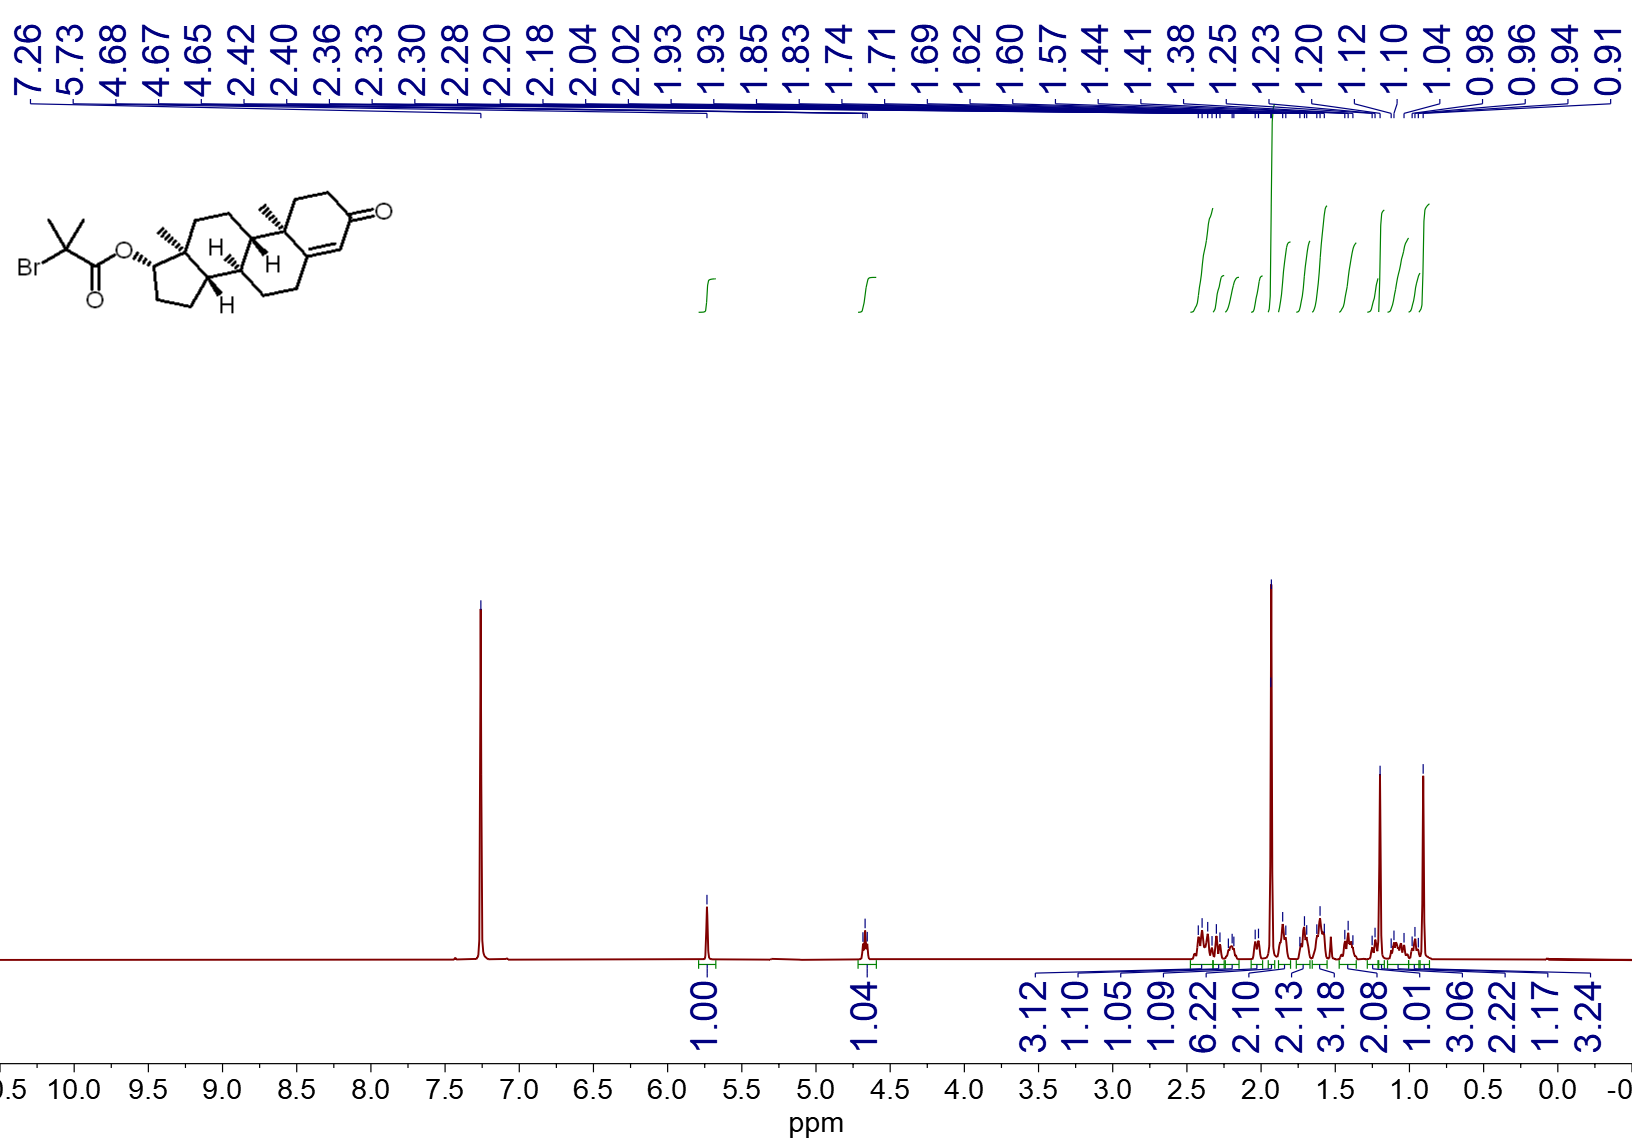


1H NMR spectrum (600 MHz, CDCl3, 23 ºC) of **2h**


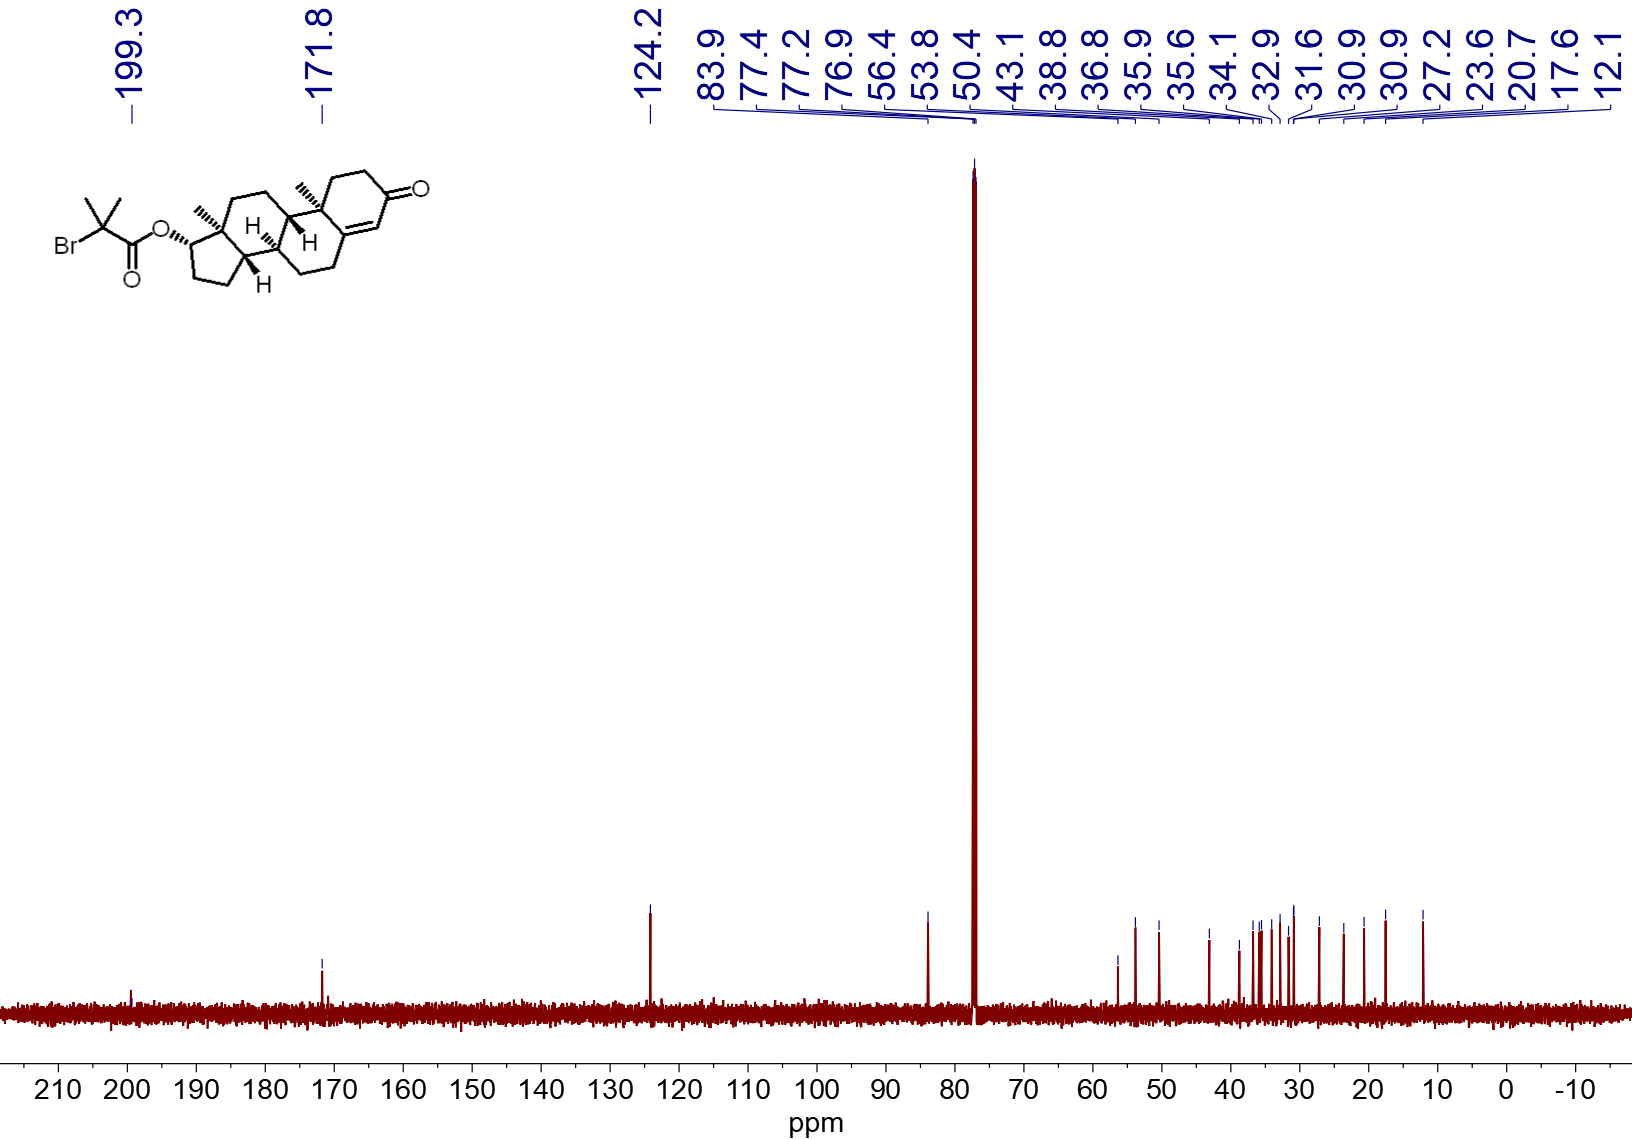


13C NMR spectrum (151 MHz, CDCl3, 23 ºC) of **2h**


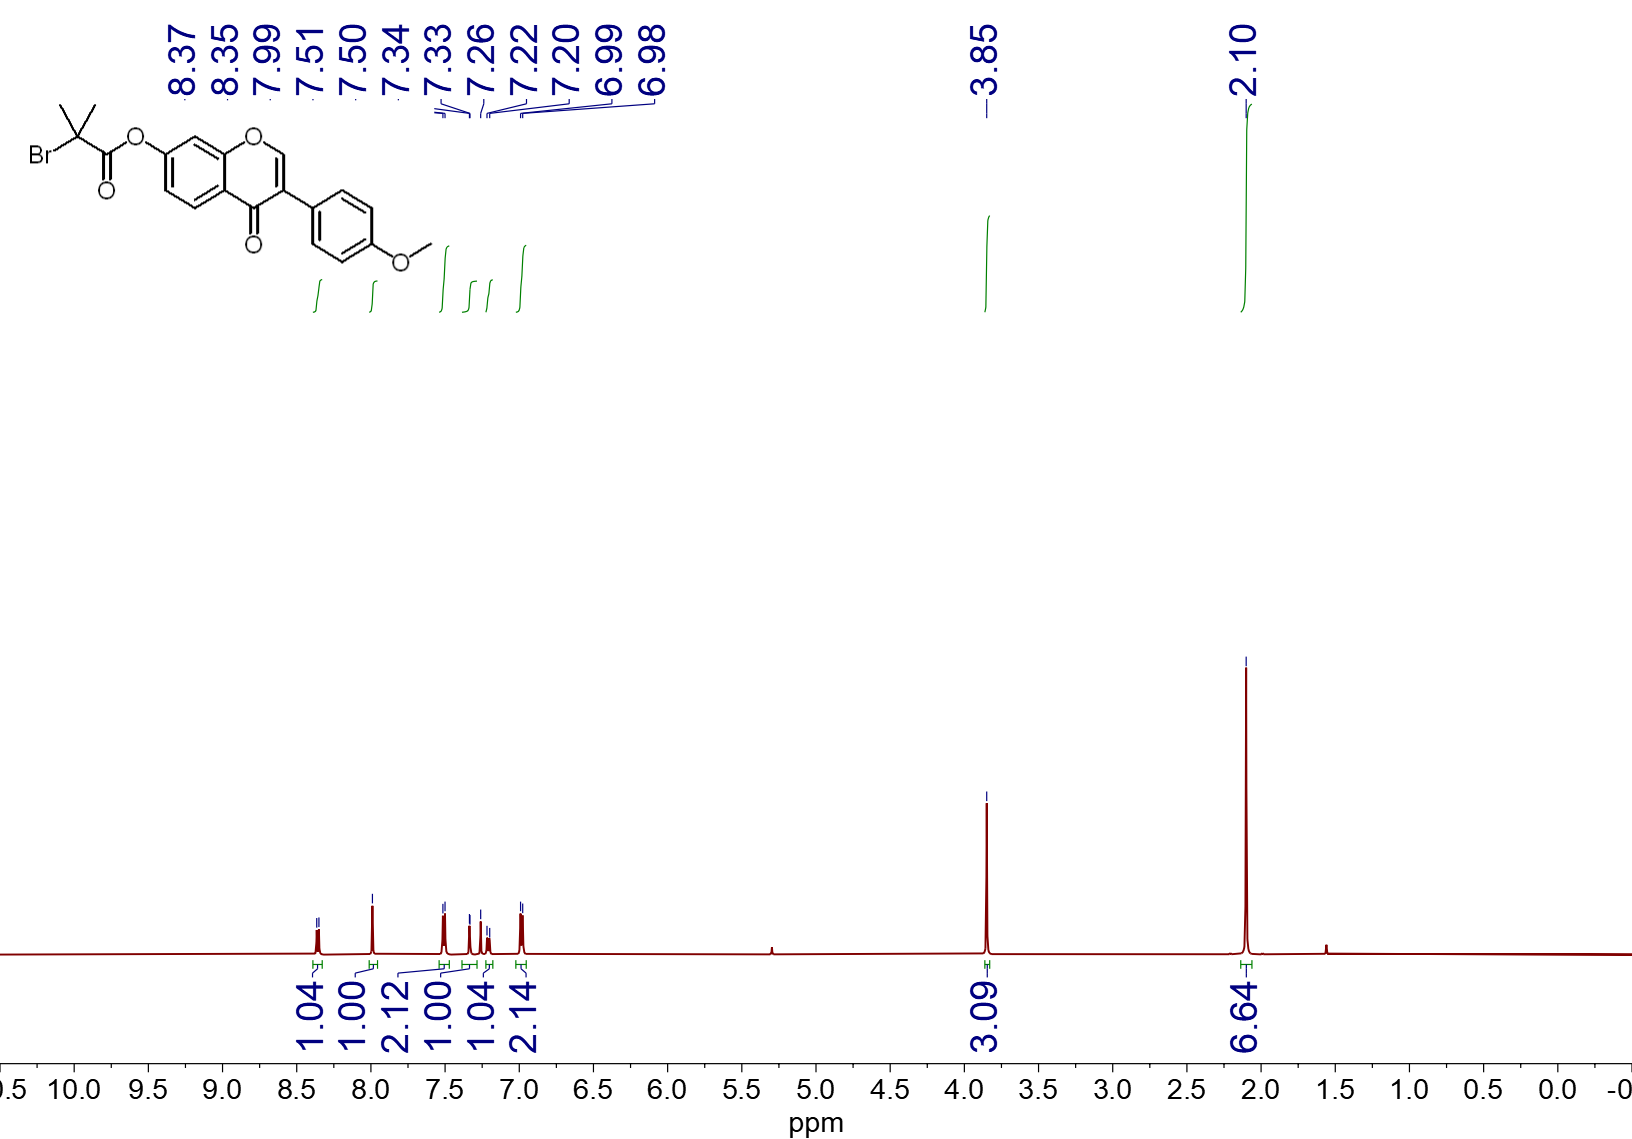


1H NMR spectrum (600 MHz, CDCl3, 23 ºC) of **2i**


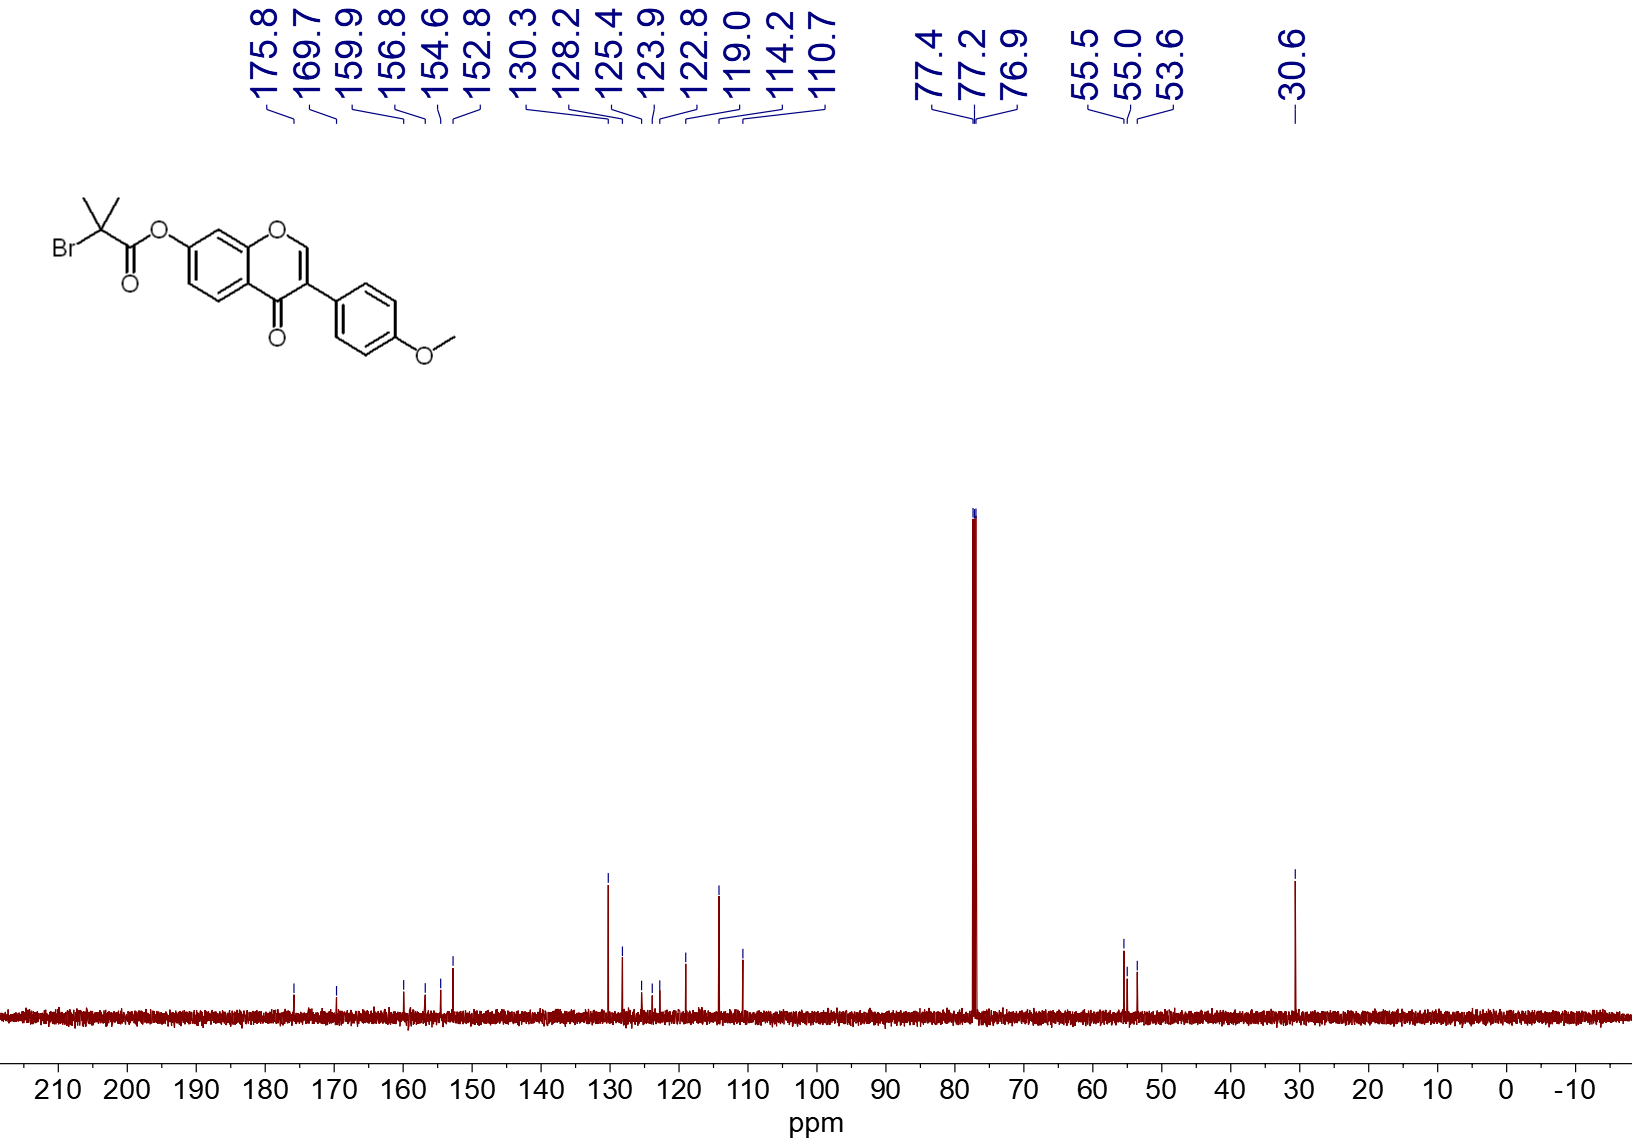


13C NMR spectrum (151 MHz, CDCl3, 23 ºC) of **2i**


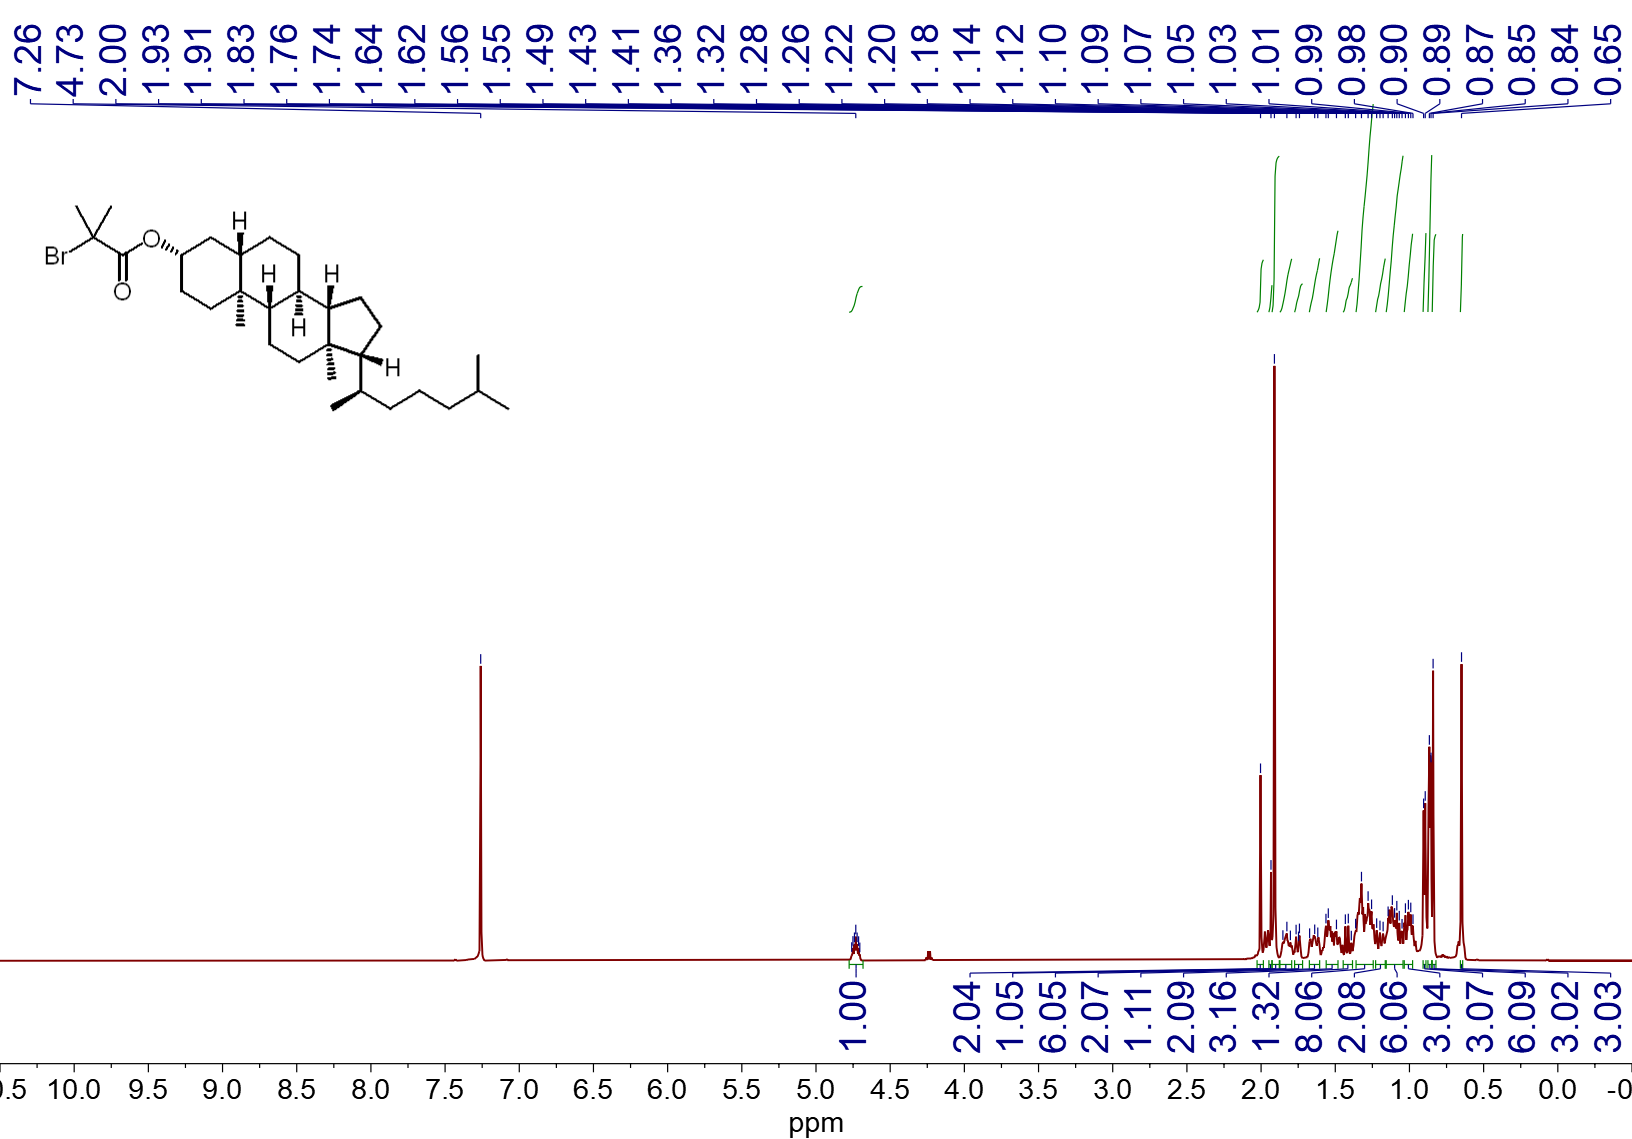


1H NMR spectrum (600 MHz, CDCl3, 23 ºC) of **2j**


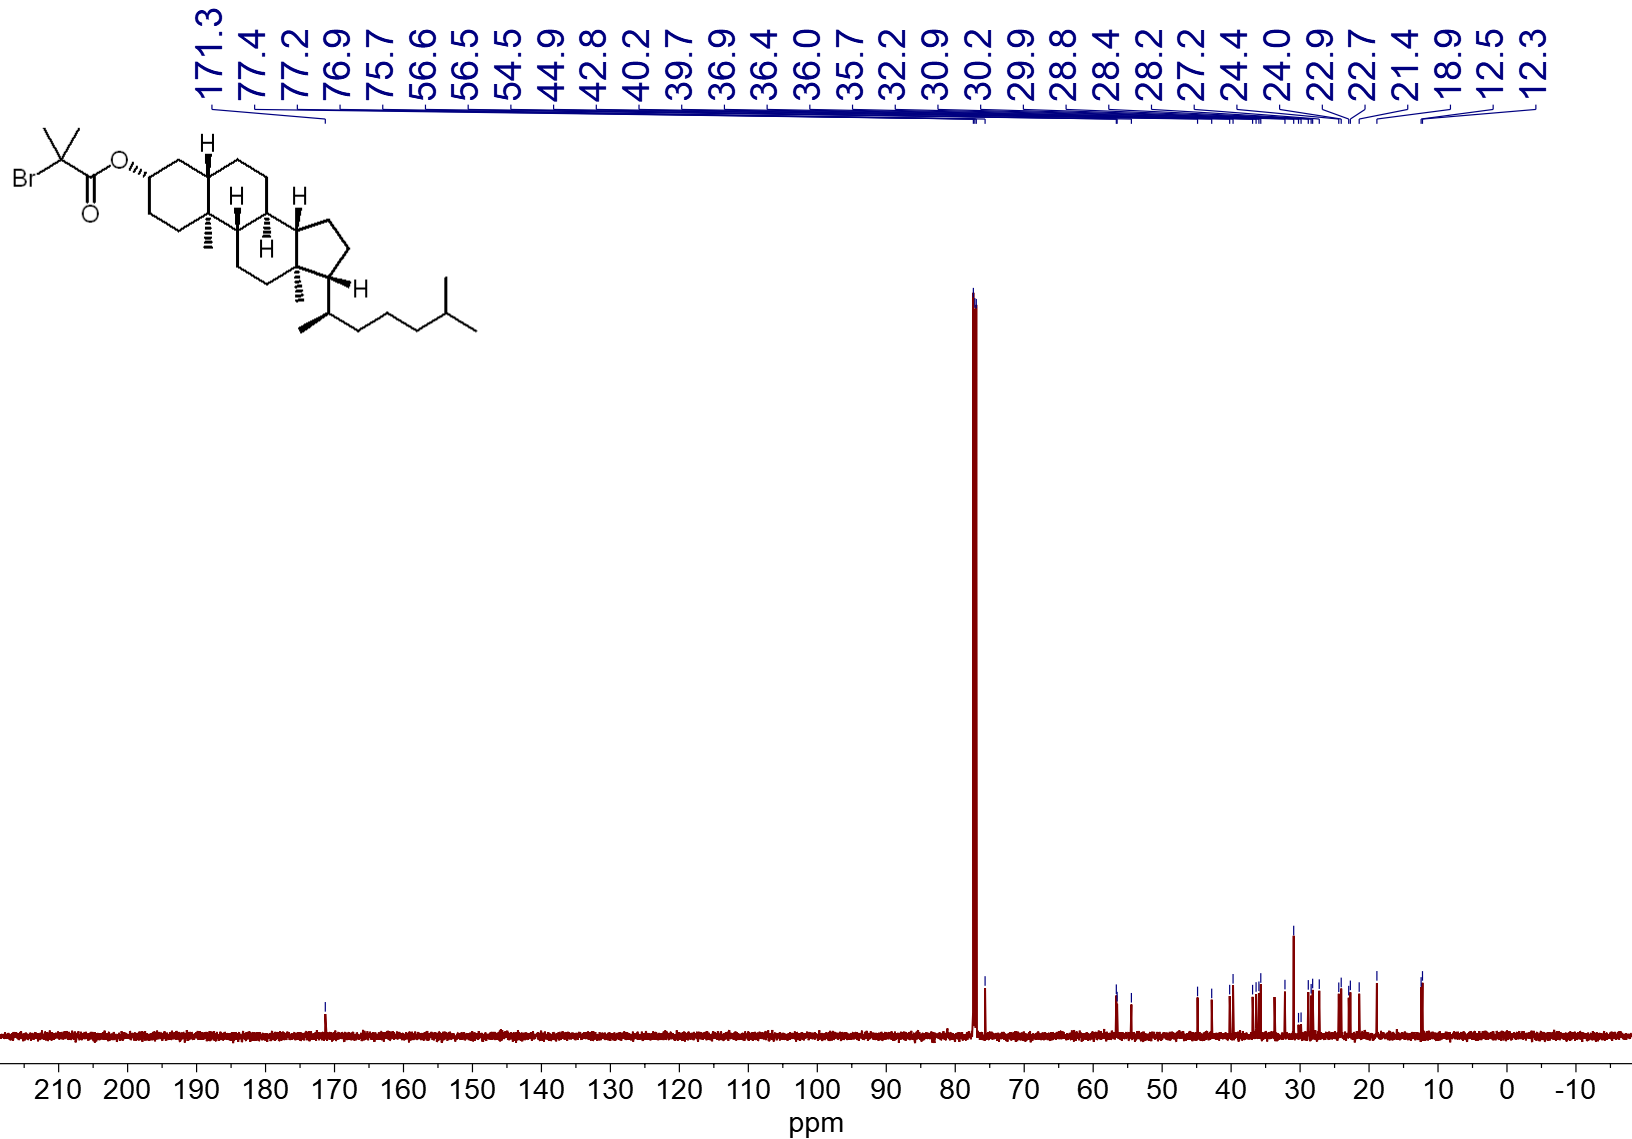


13C NMR spectrum (151 MHz, CDCl3, 23 ºC) of **2j**


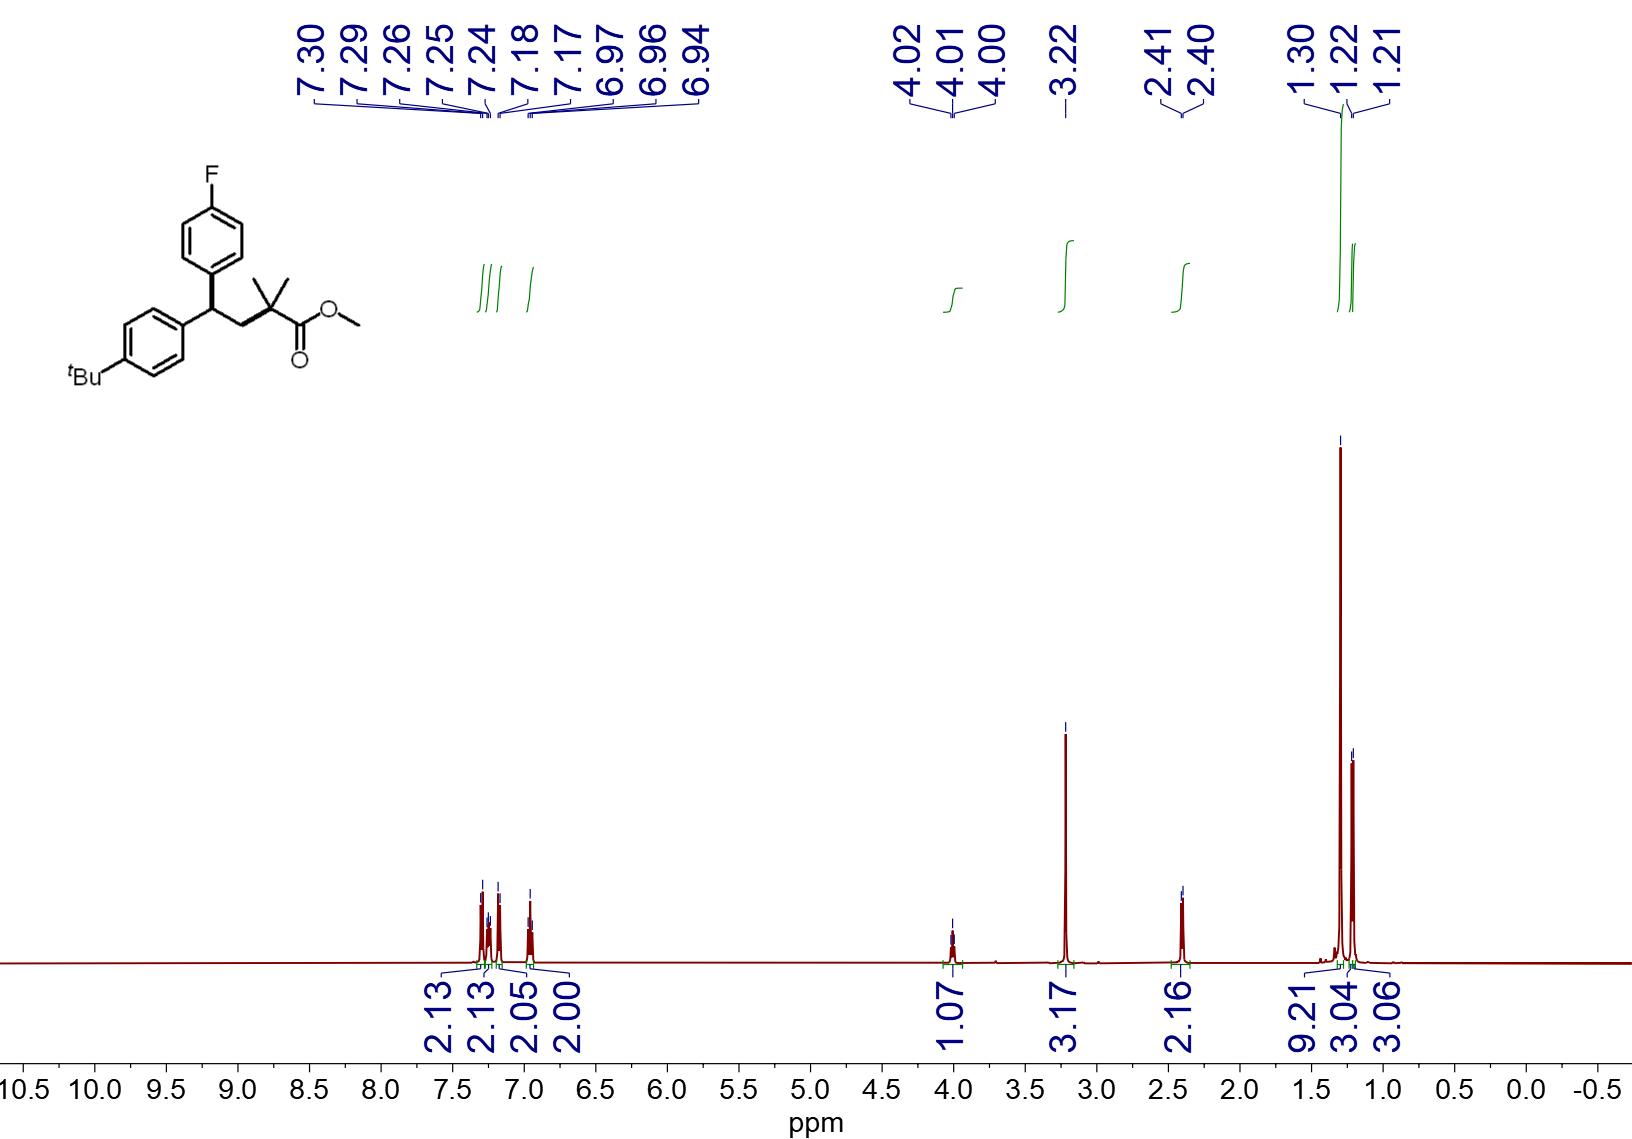


1H NMR spectrum (600 MHz, CDCl3, 23 ºC) of **4a**


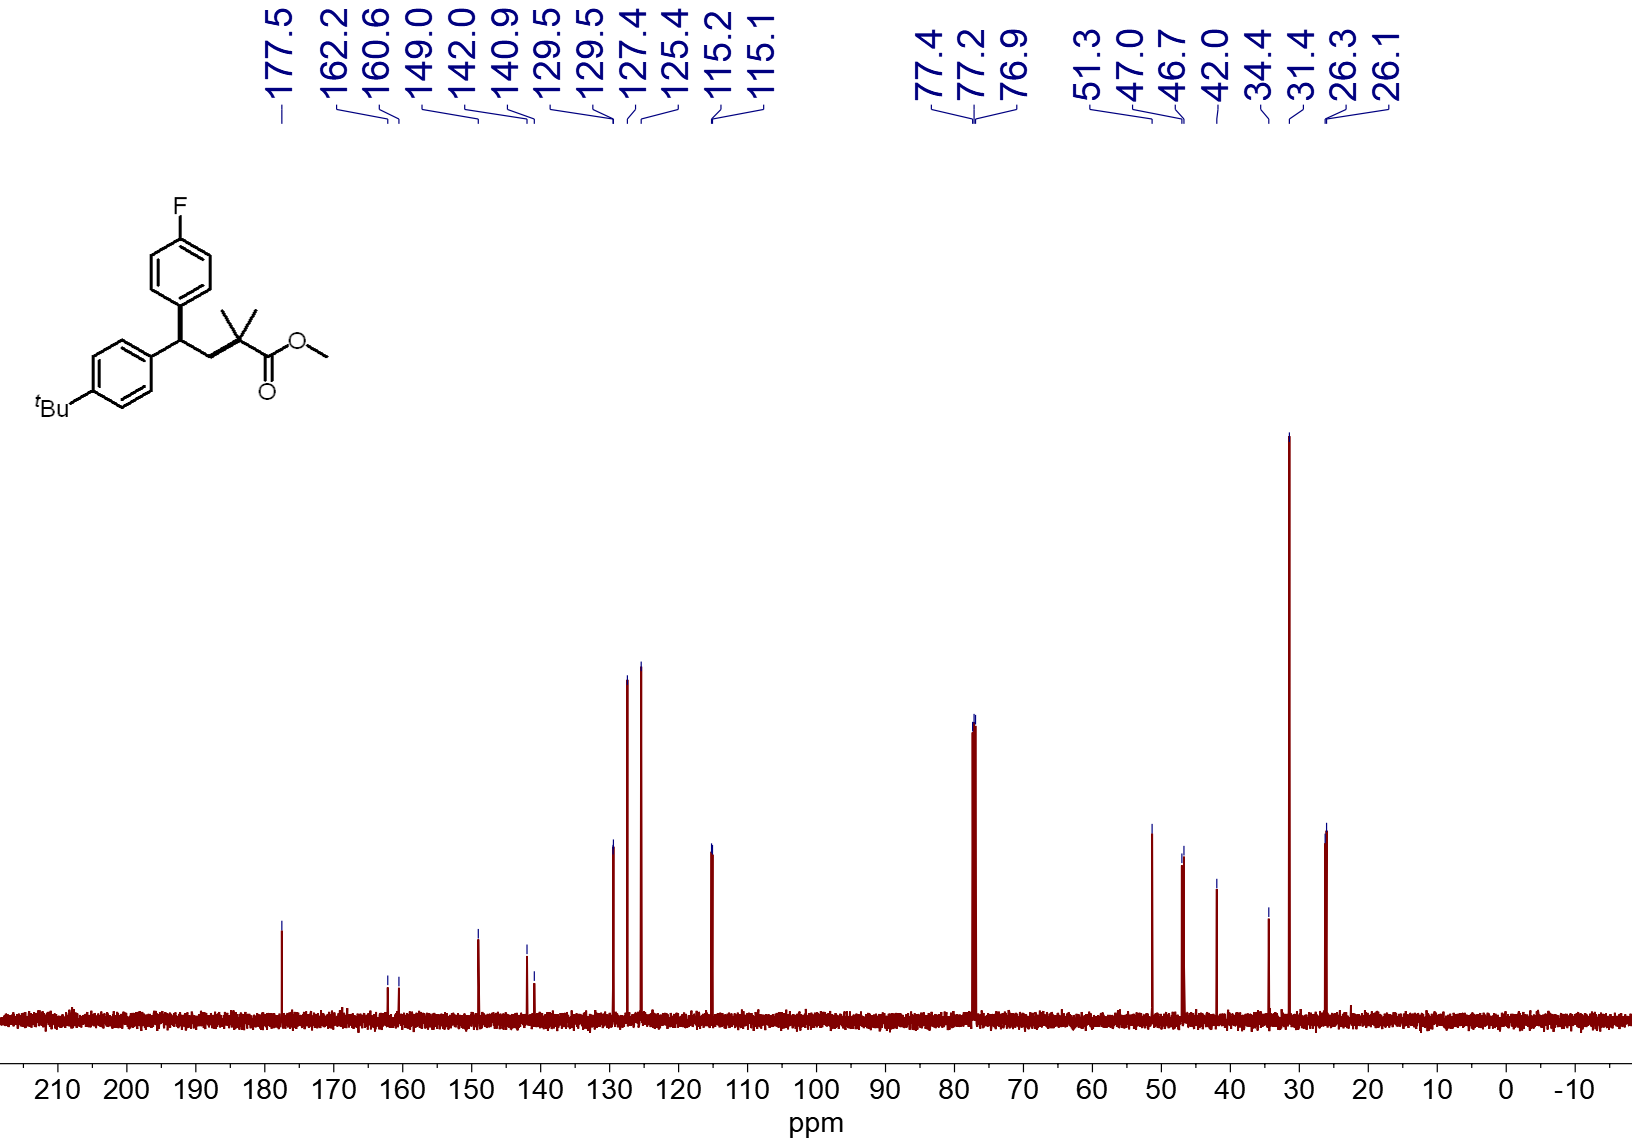


13C NMR spectrum (151 MHz, CDCl3, 23 ºC) of **4a**


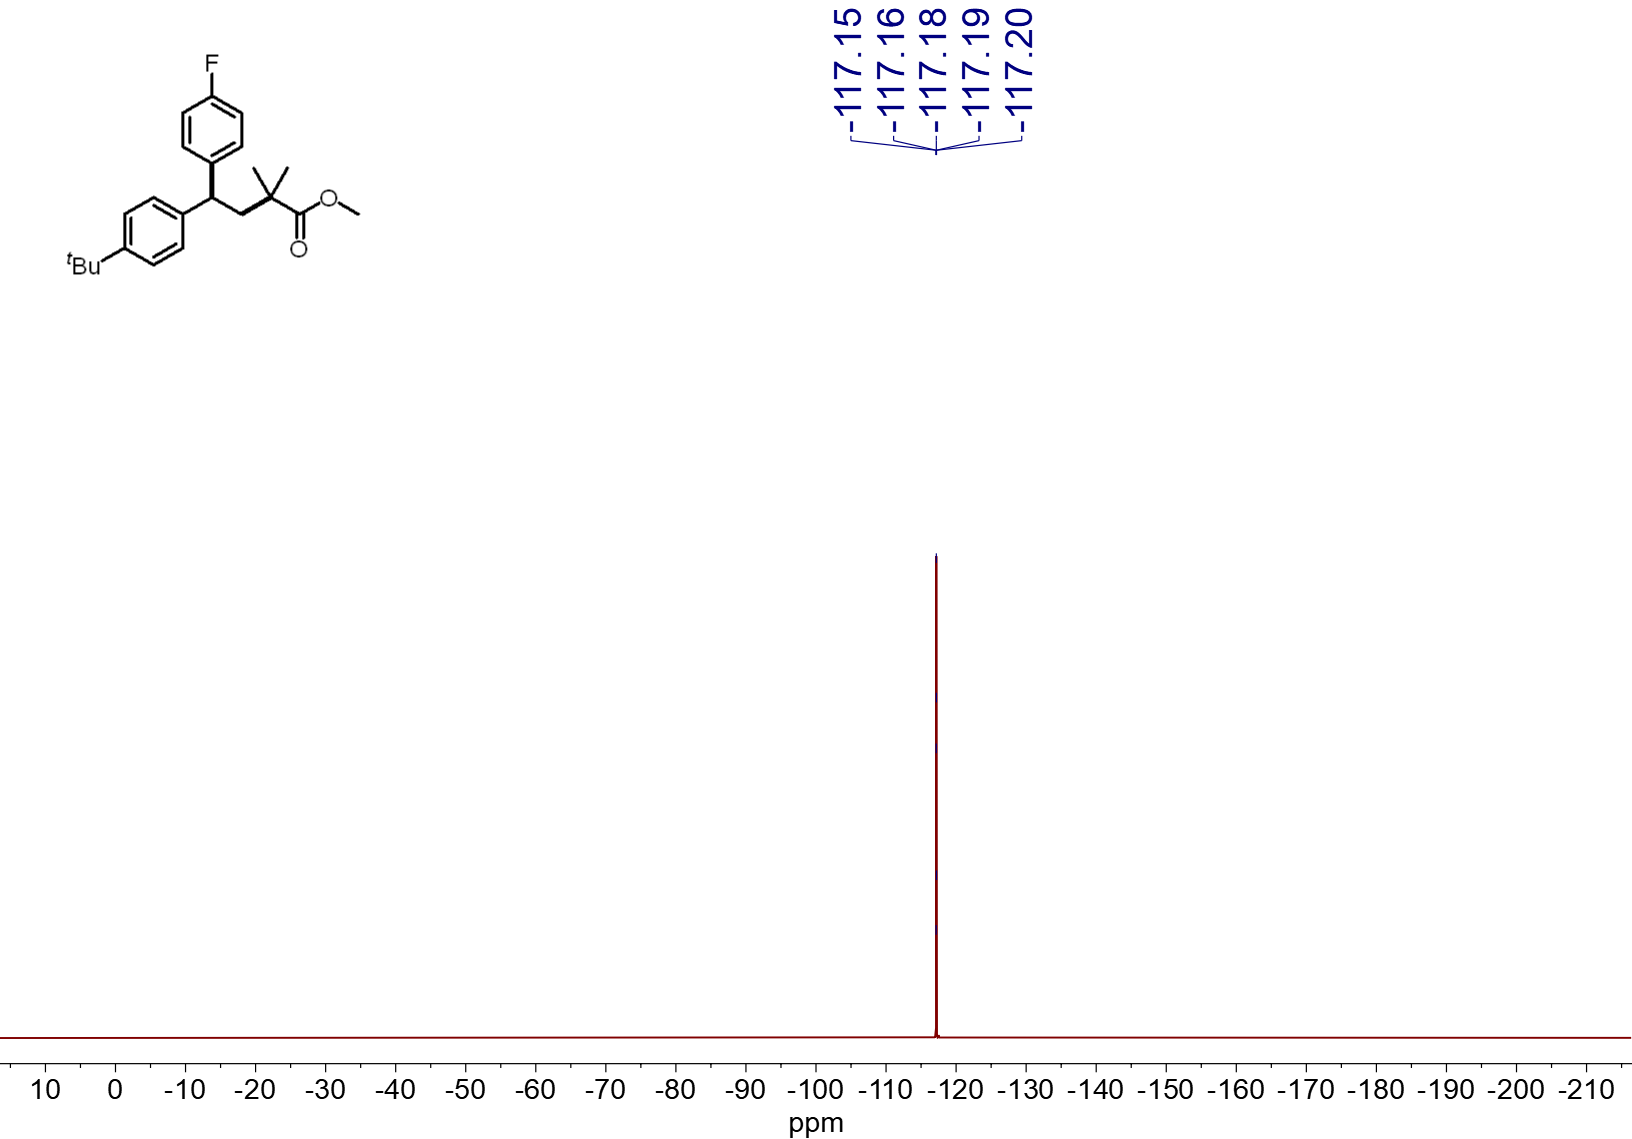
19F NMR spectrum (565 MHz, CDCl3, 23 ºC) of **4a**


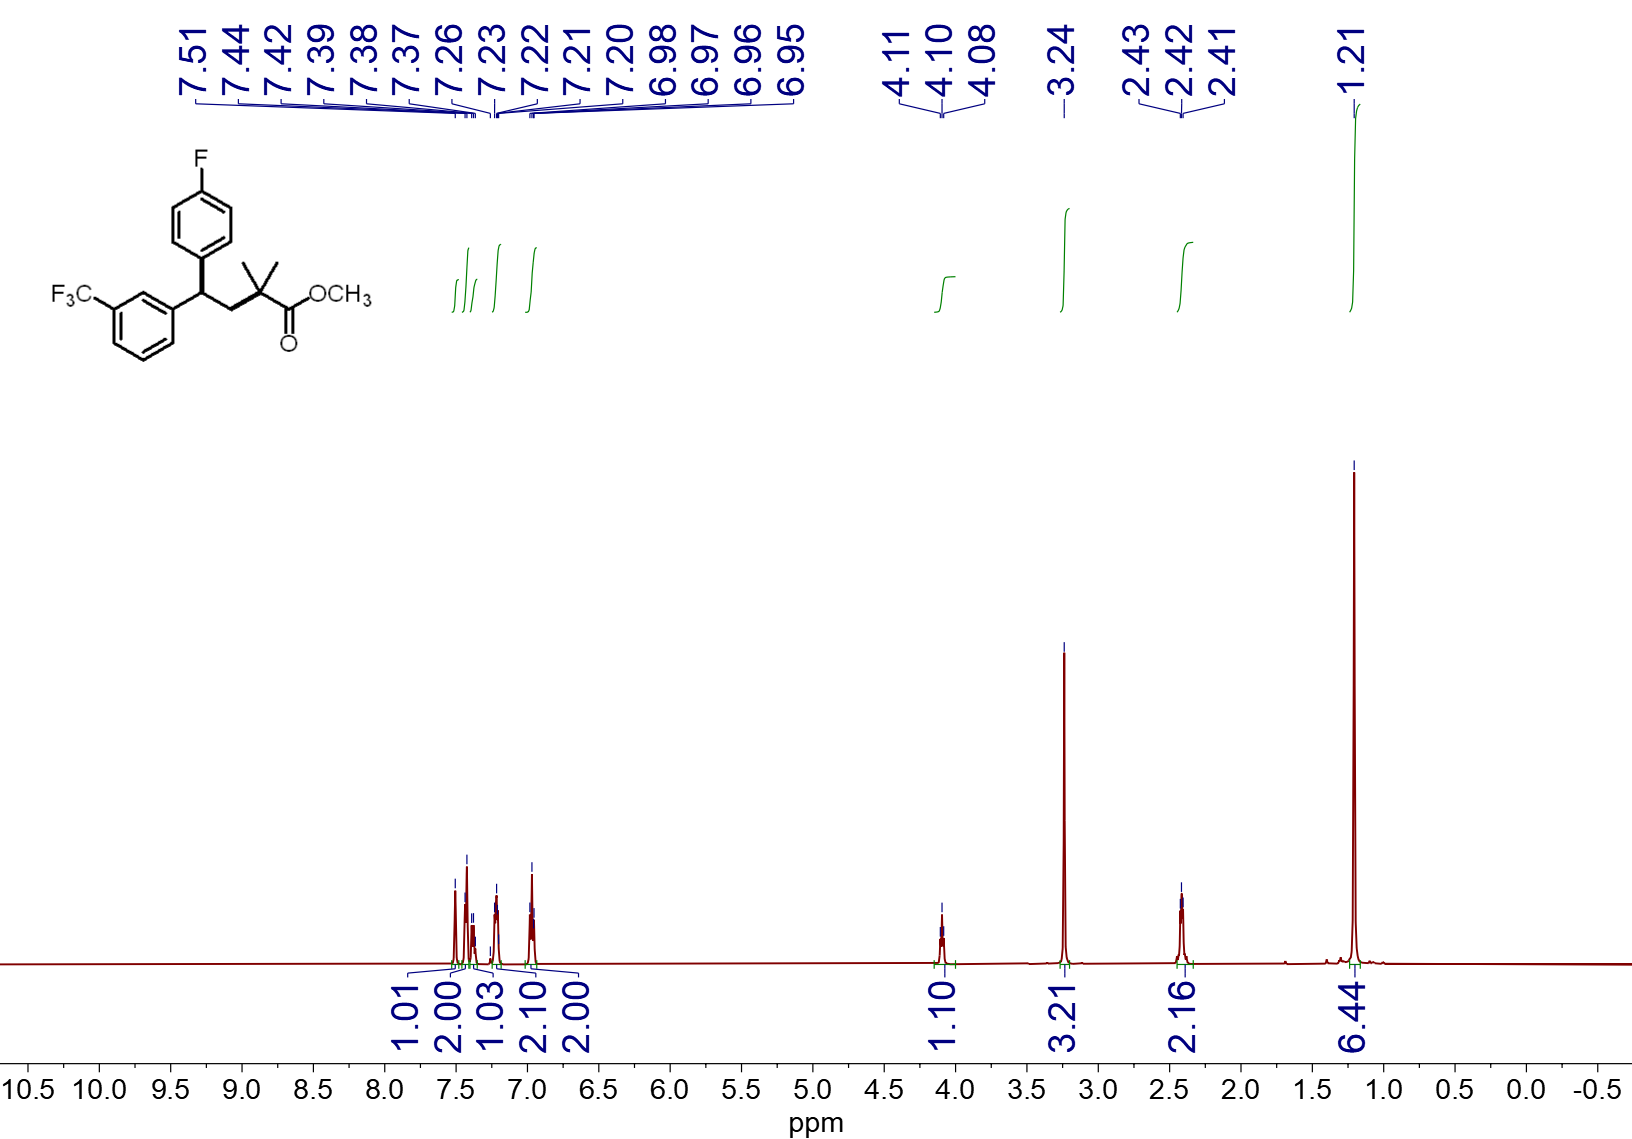


1H NMR spectrum (600 MHz, CDCl3, 23 ºC) of **4b**


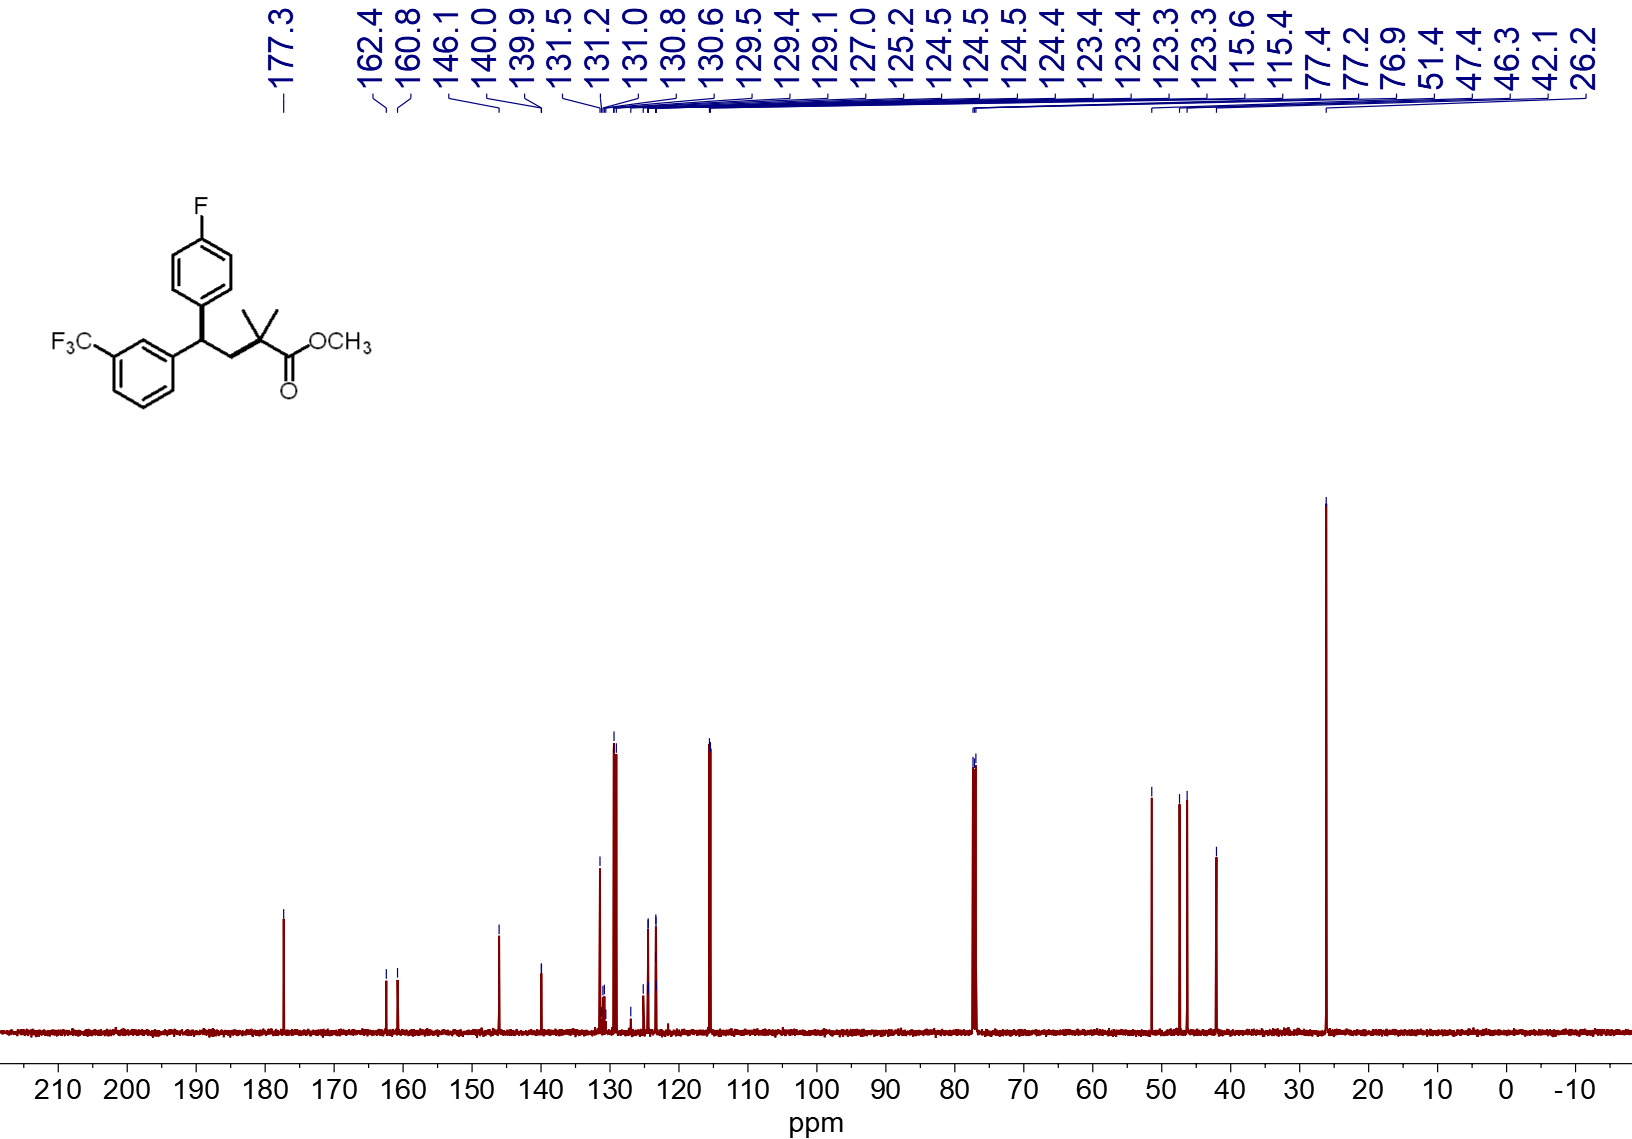


13C NMR spectrum (151 MHz, CDCl3, 23 ºC) of **4b**


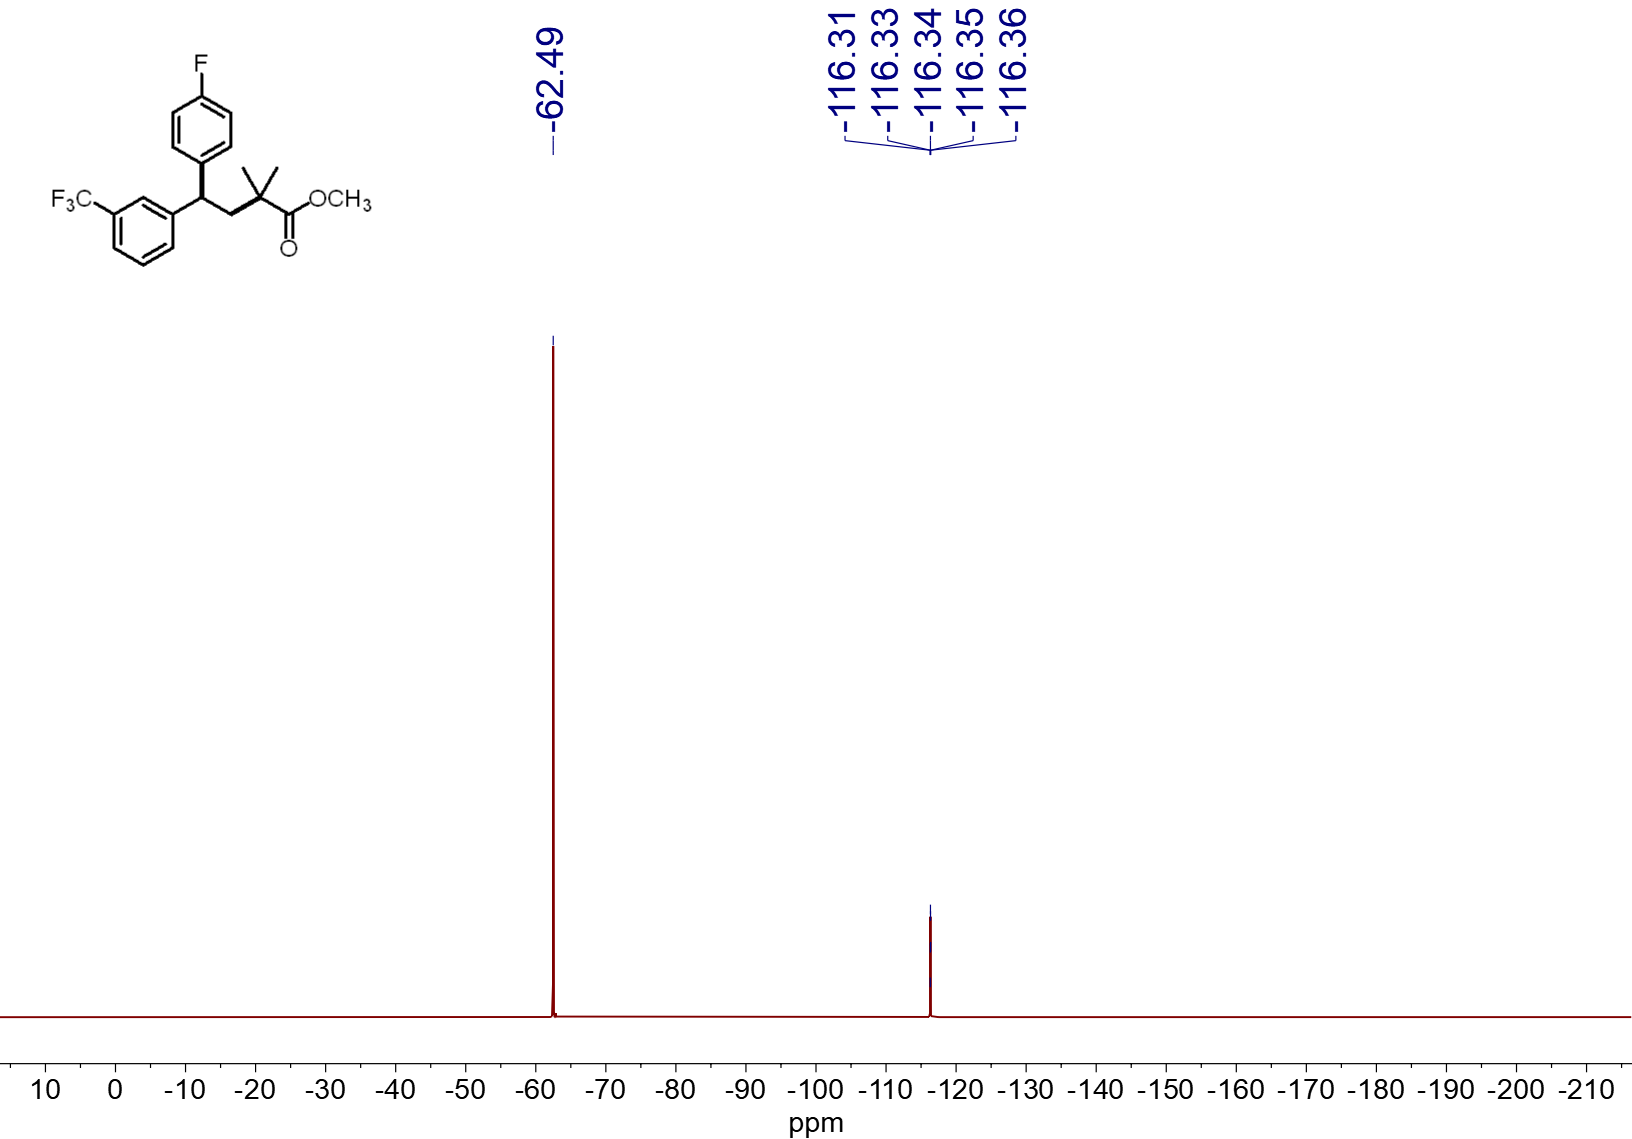


19F NMR spectrum (565 MHz, CDCl3, 23 ºC) of **4b**


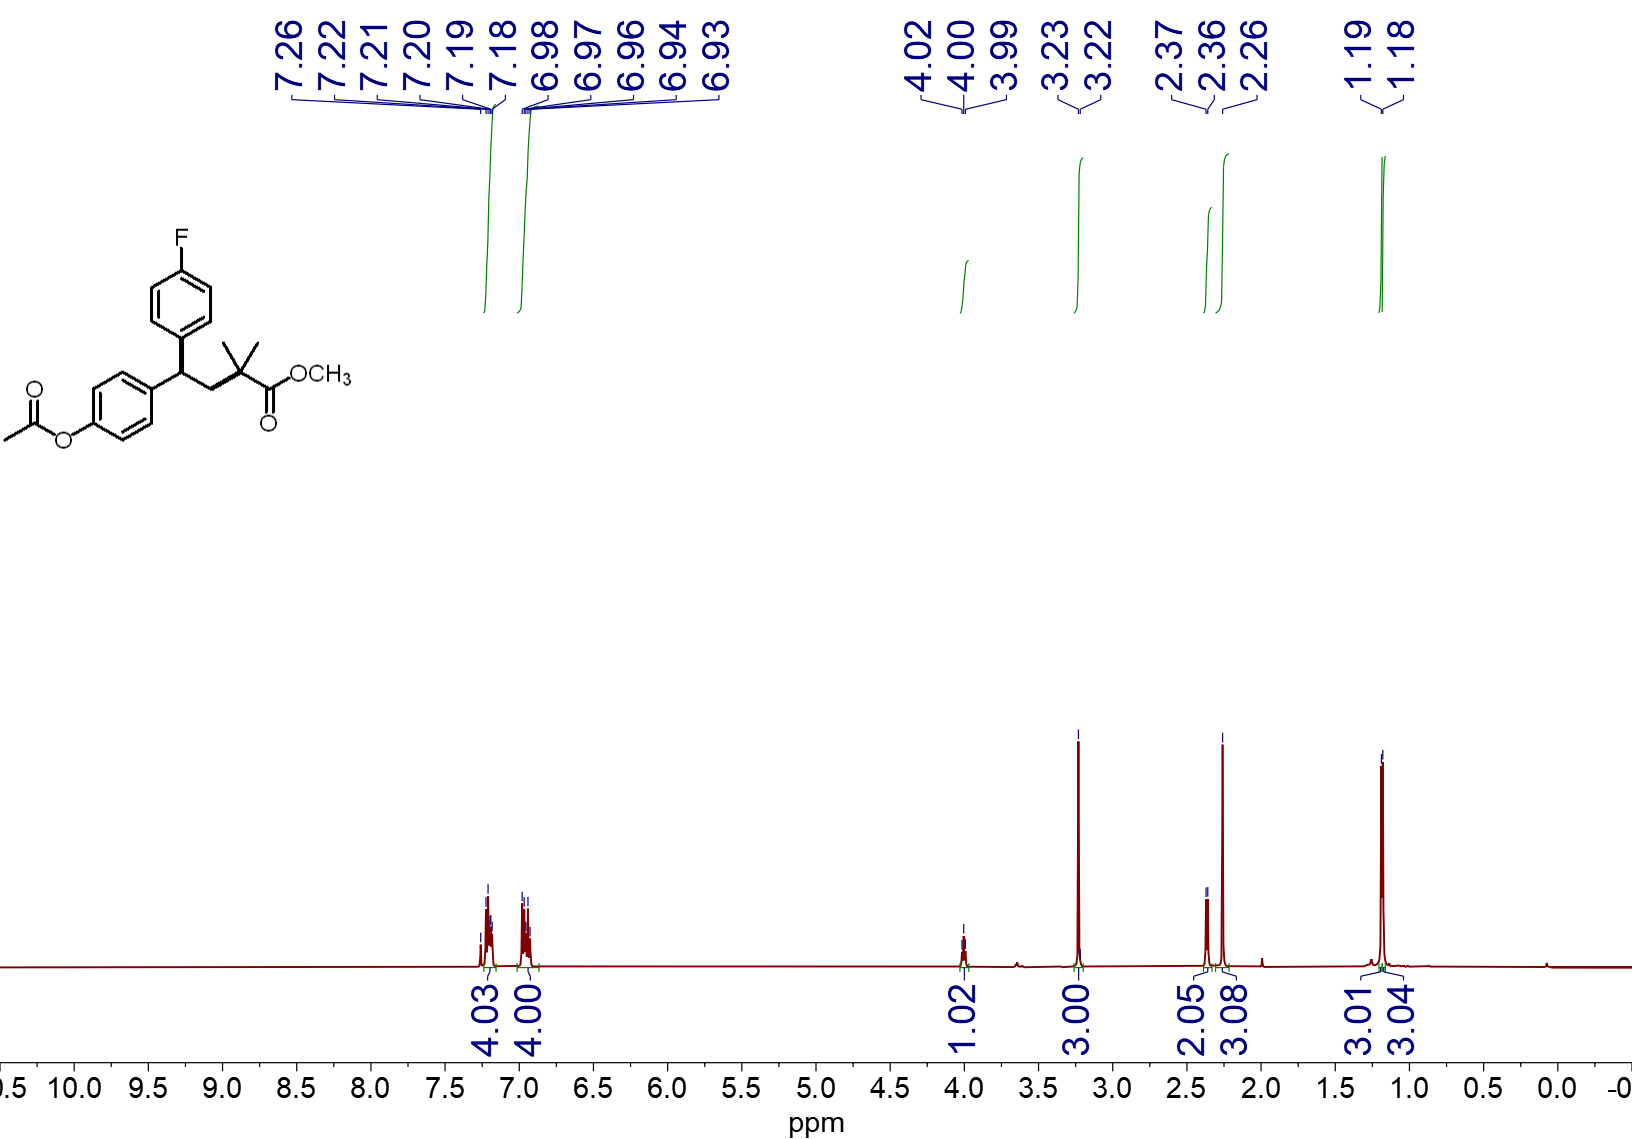


1H NMR spectrum (600 MHz, CDCl3, 23 ºC) of **4c**


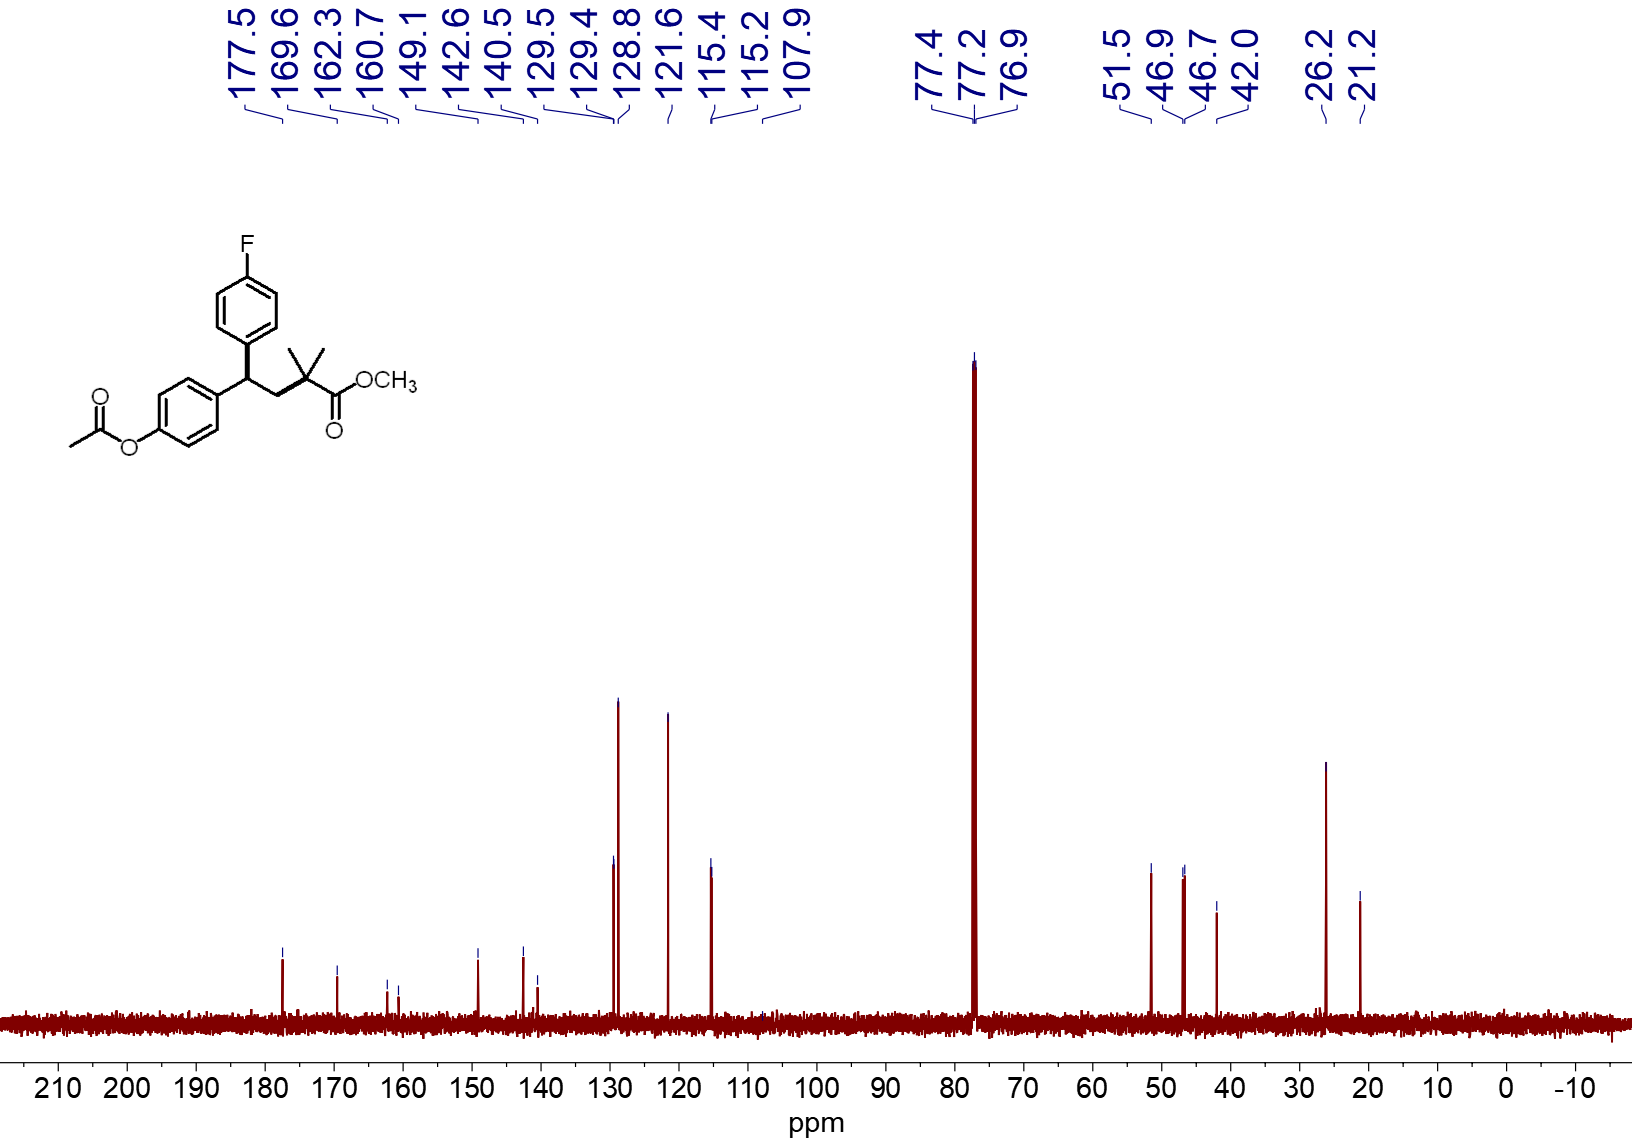


13C NMR spectrum (151 MHz, CDCl3, 23 ºC) of **4c**


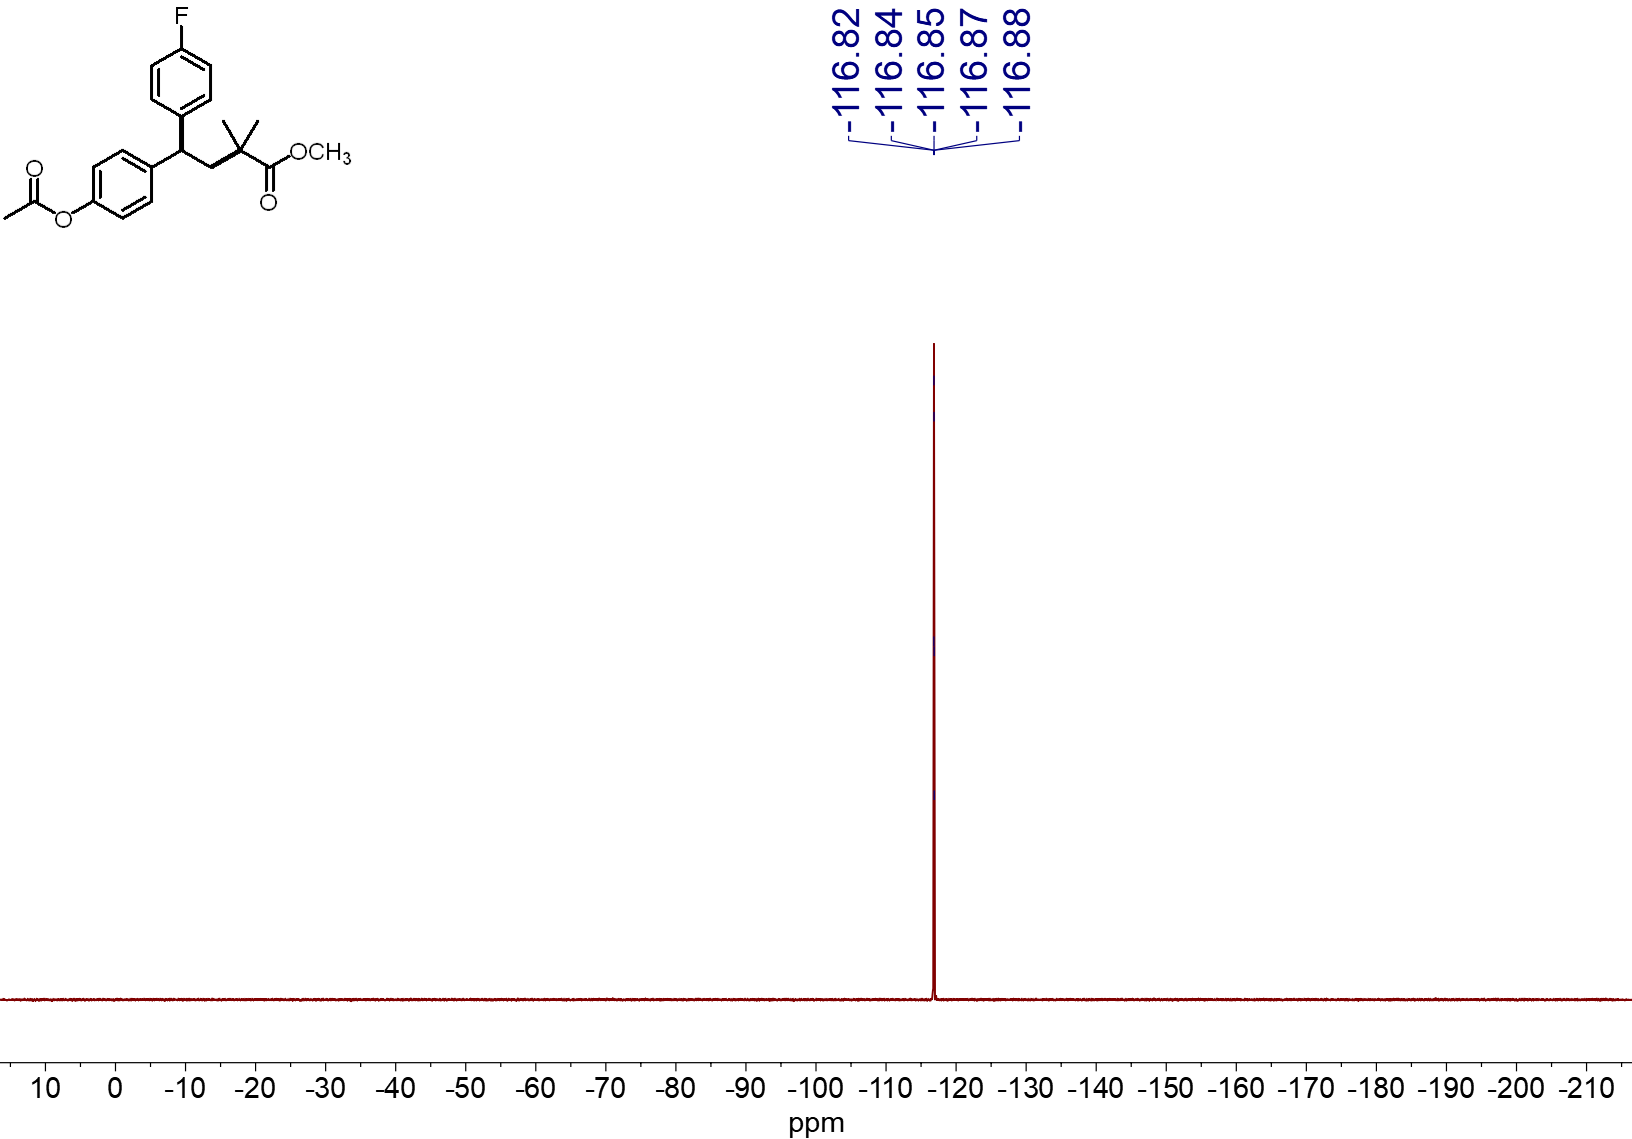


19F NMR spectrum (565 MHz, CDCl3, 23 ºC) of **4c**


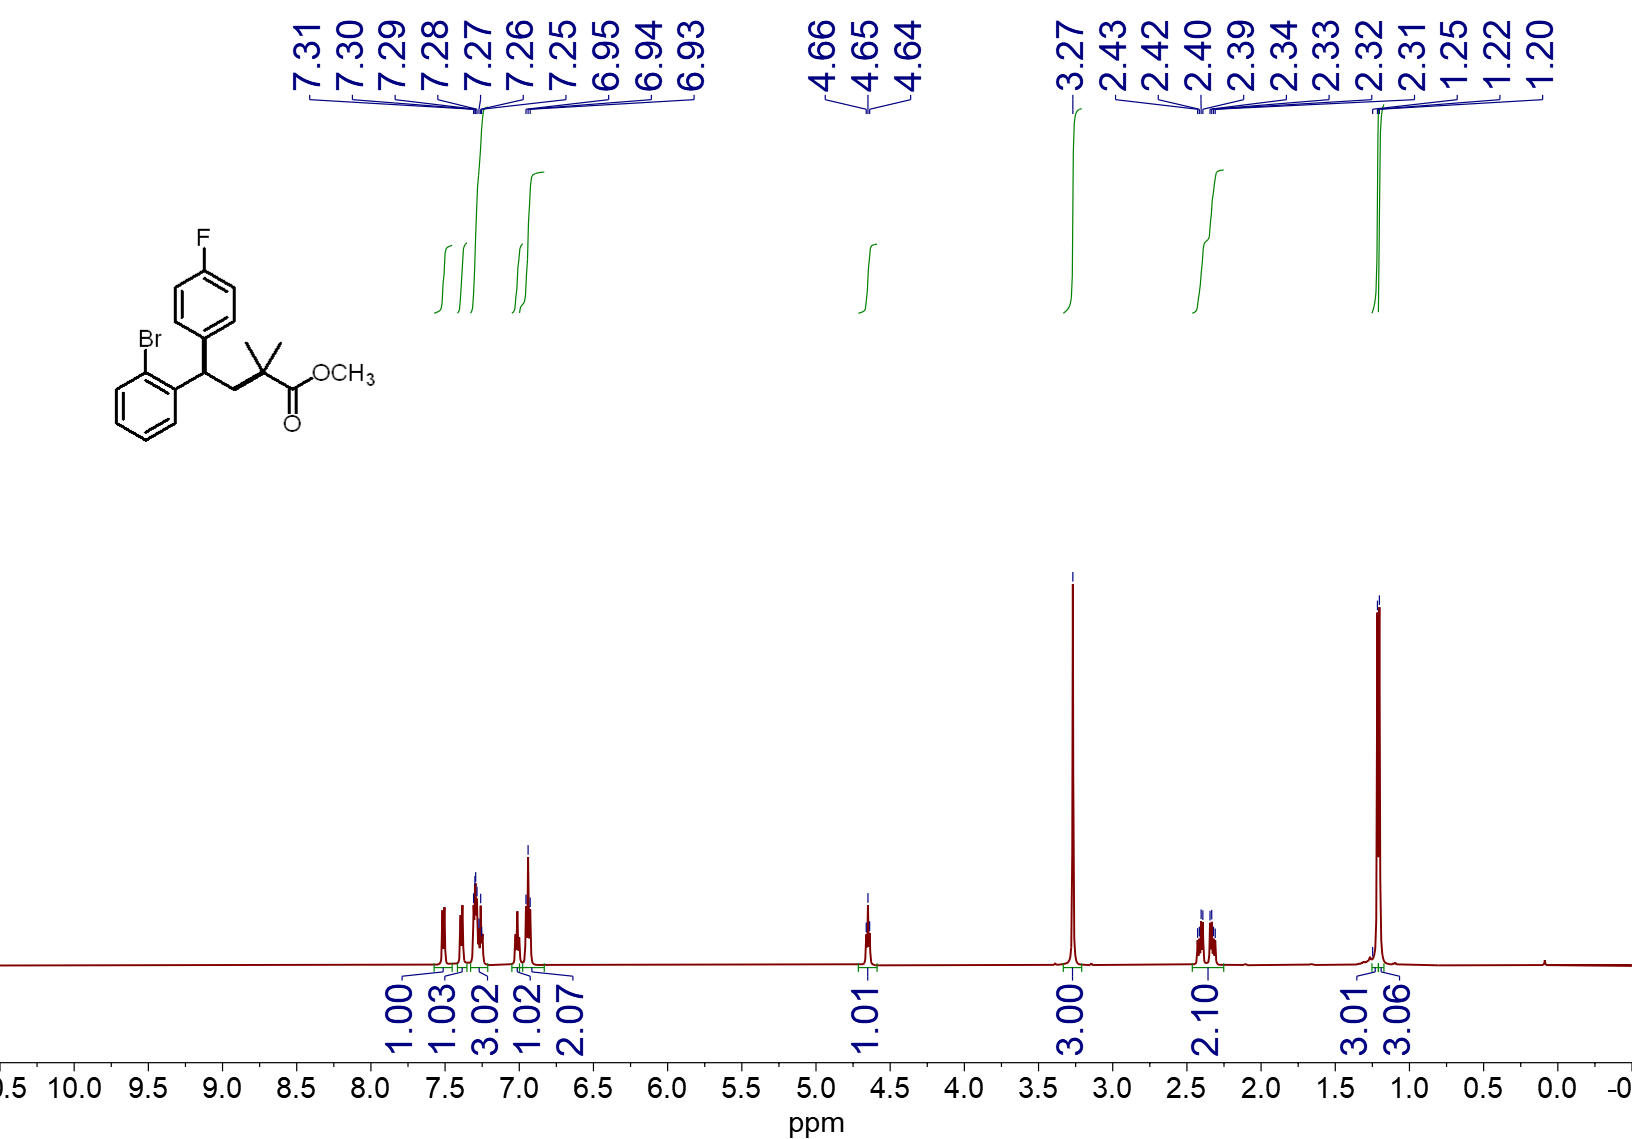


1H NMR spectrum (600 MHz, CDCl3, 23 ºC) of **4d**


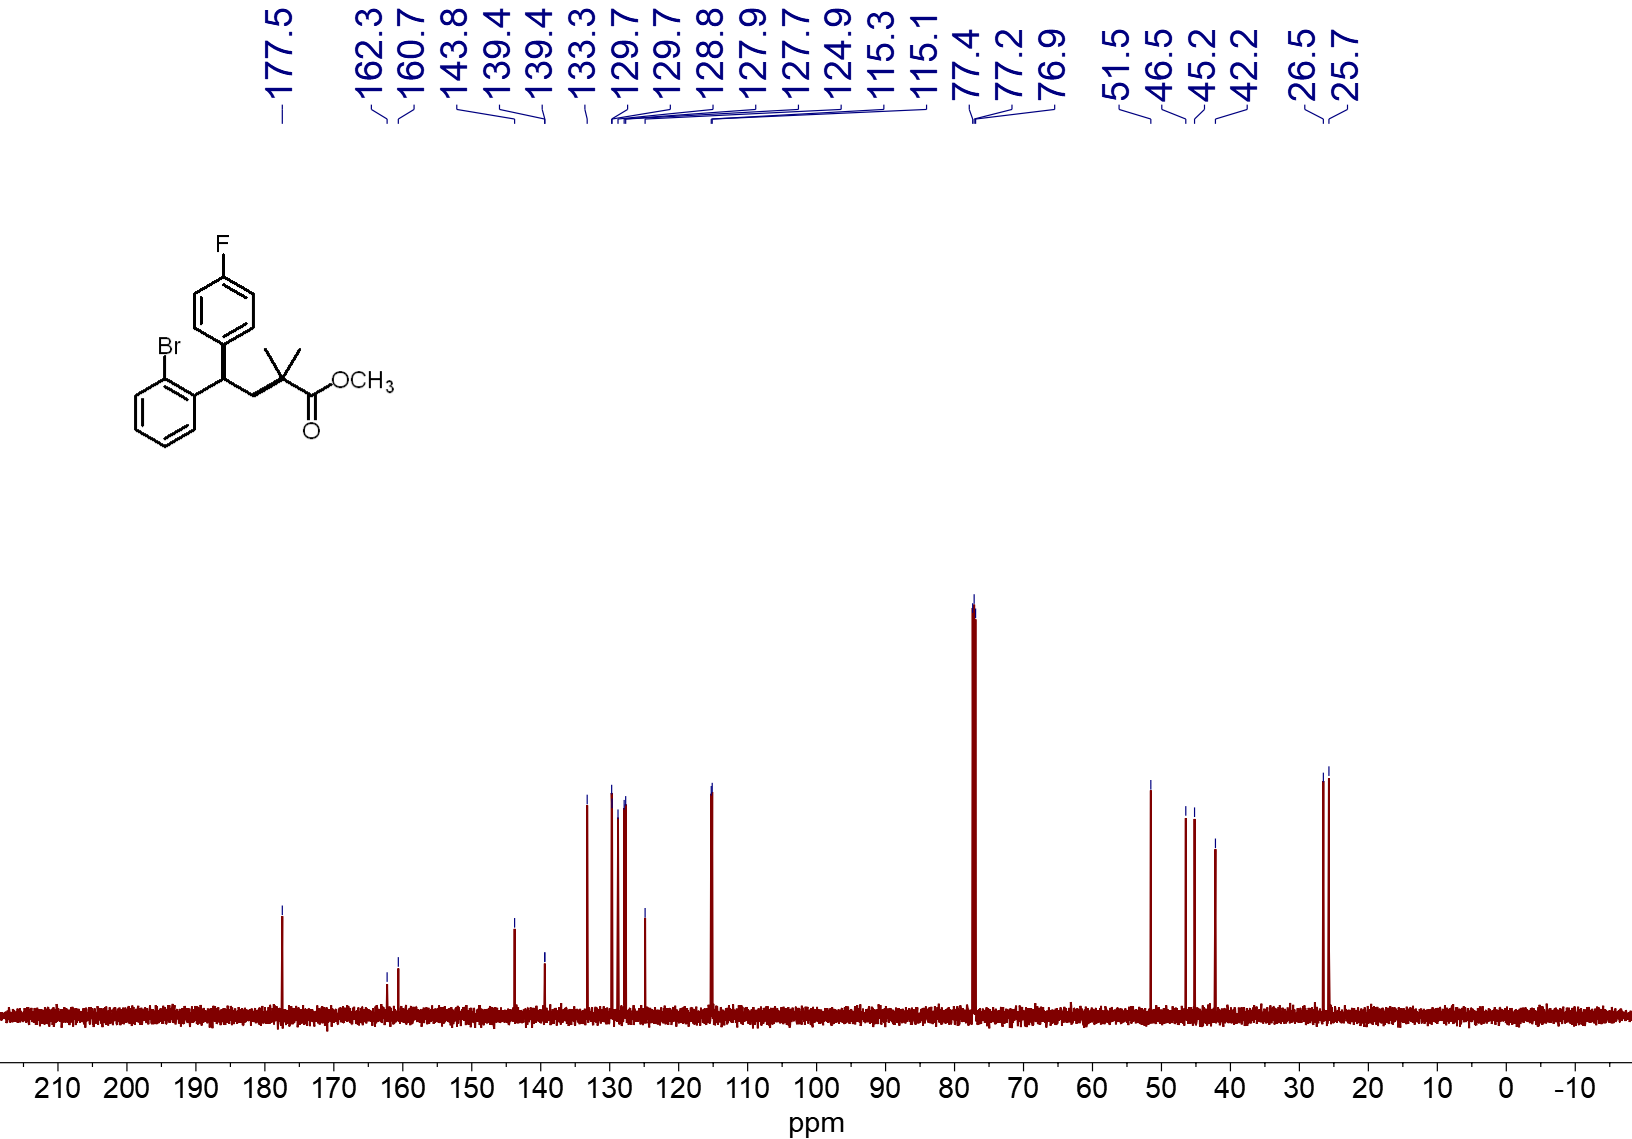


13C NMR spectrum (151 MHz, CDCl3, 23 ºC) of **4d**


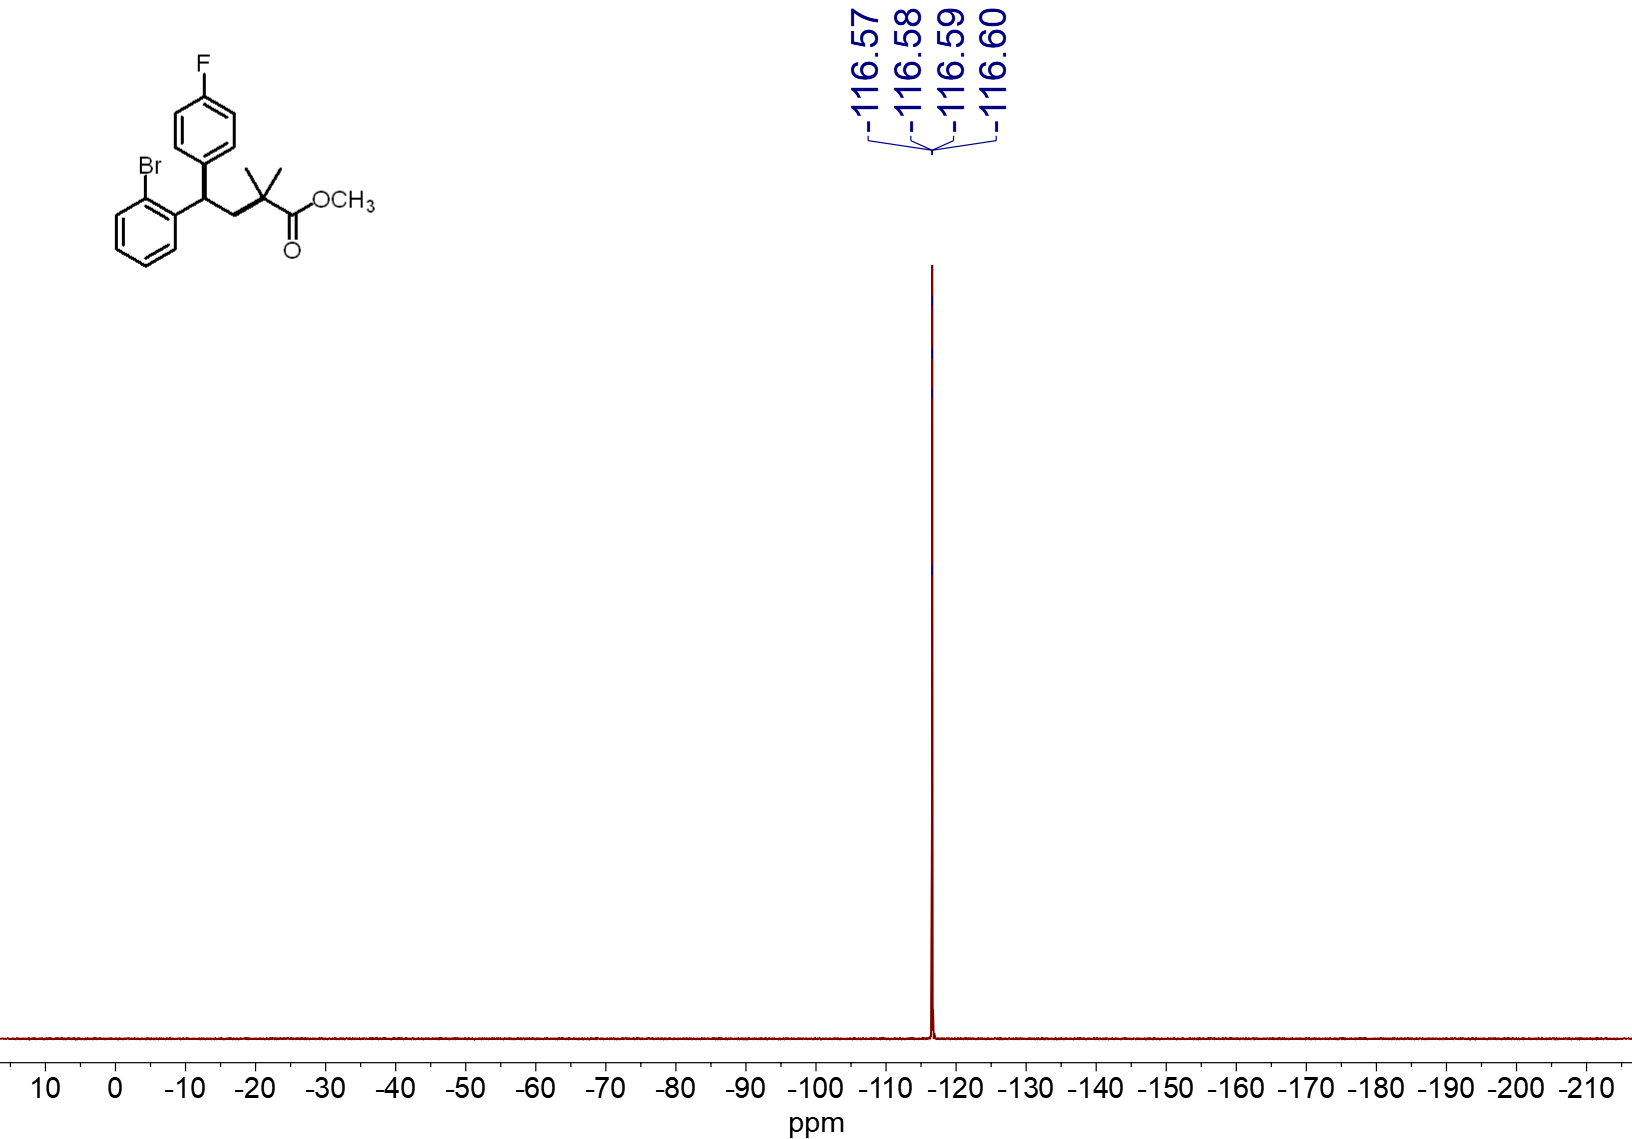


19F NMR spectrum (565 MHz, CDCl3, 23 ºC) of **4d**


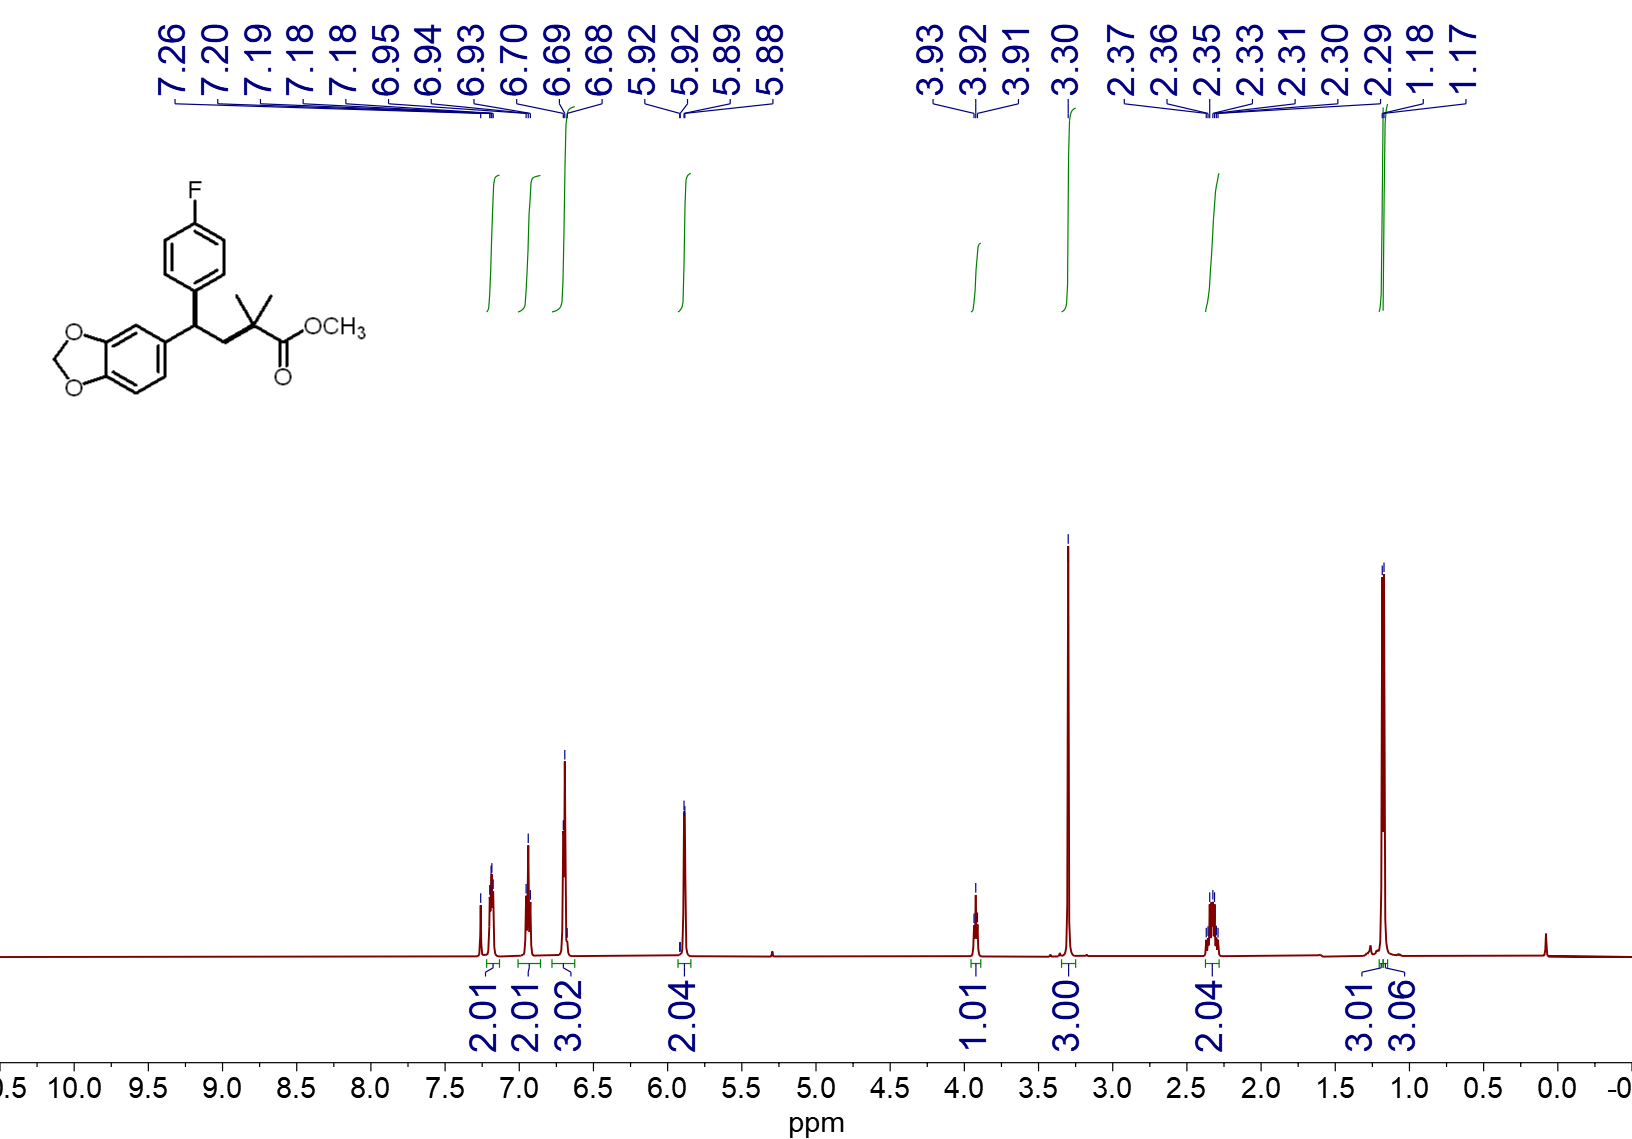


1H NMR spectrum (600 MHz, CDCl3, 23 ºC) of **4e**


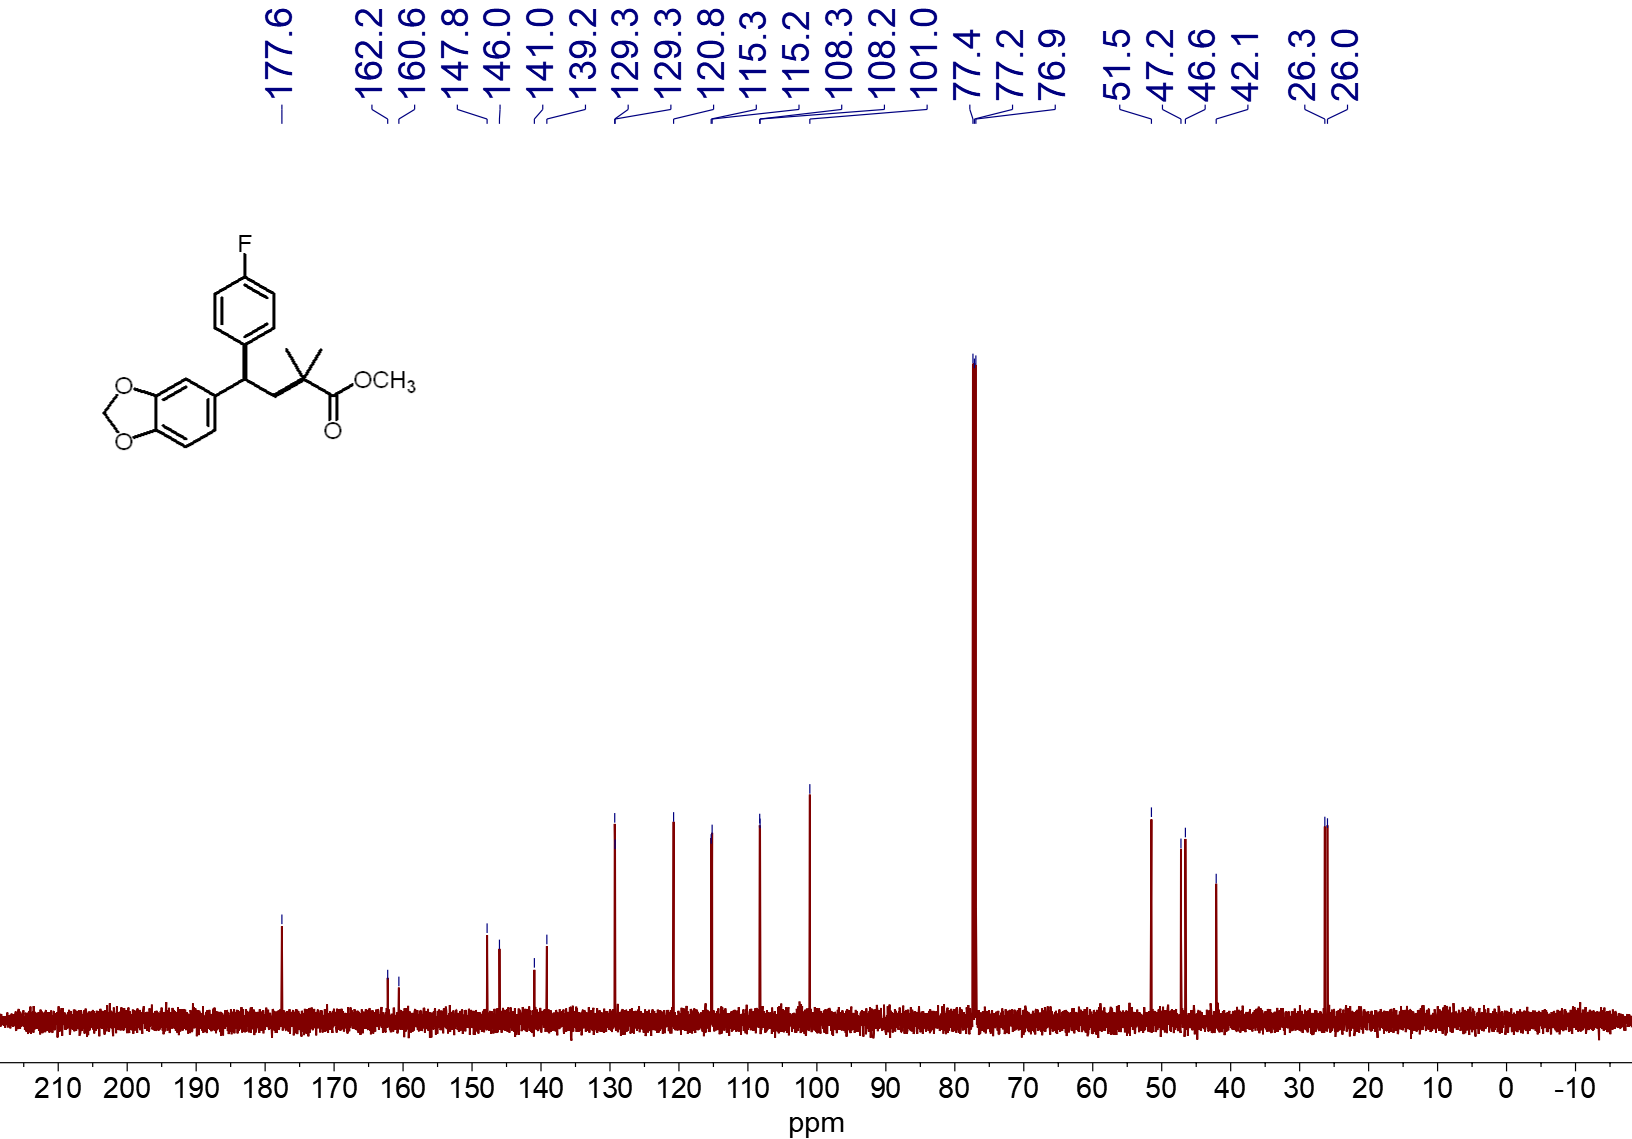


13C NMR spectrum (151 MHz, CDCl3, 23 ºC) of **4e**


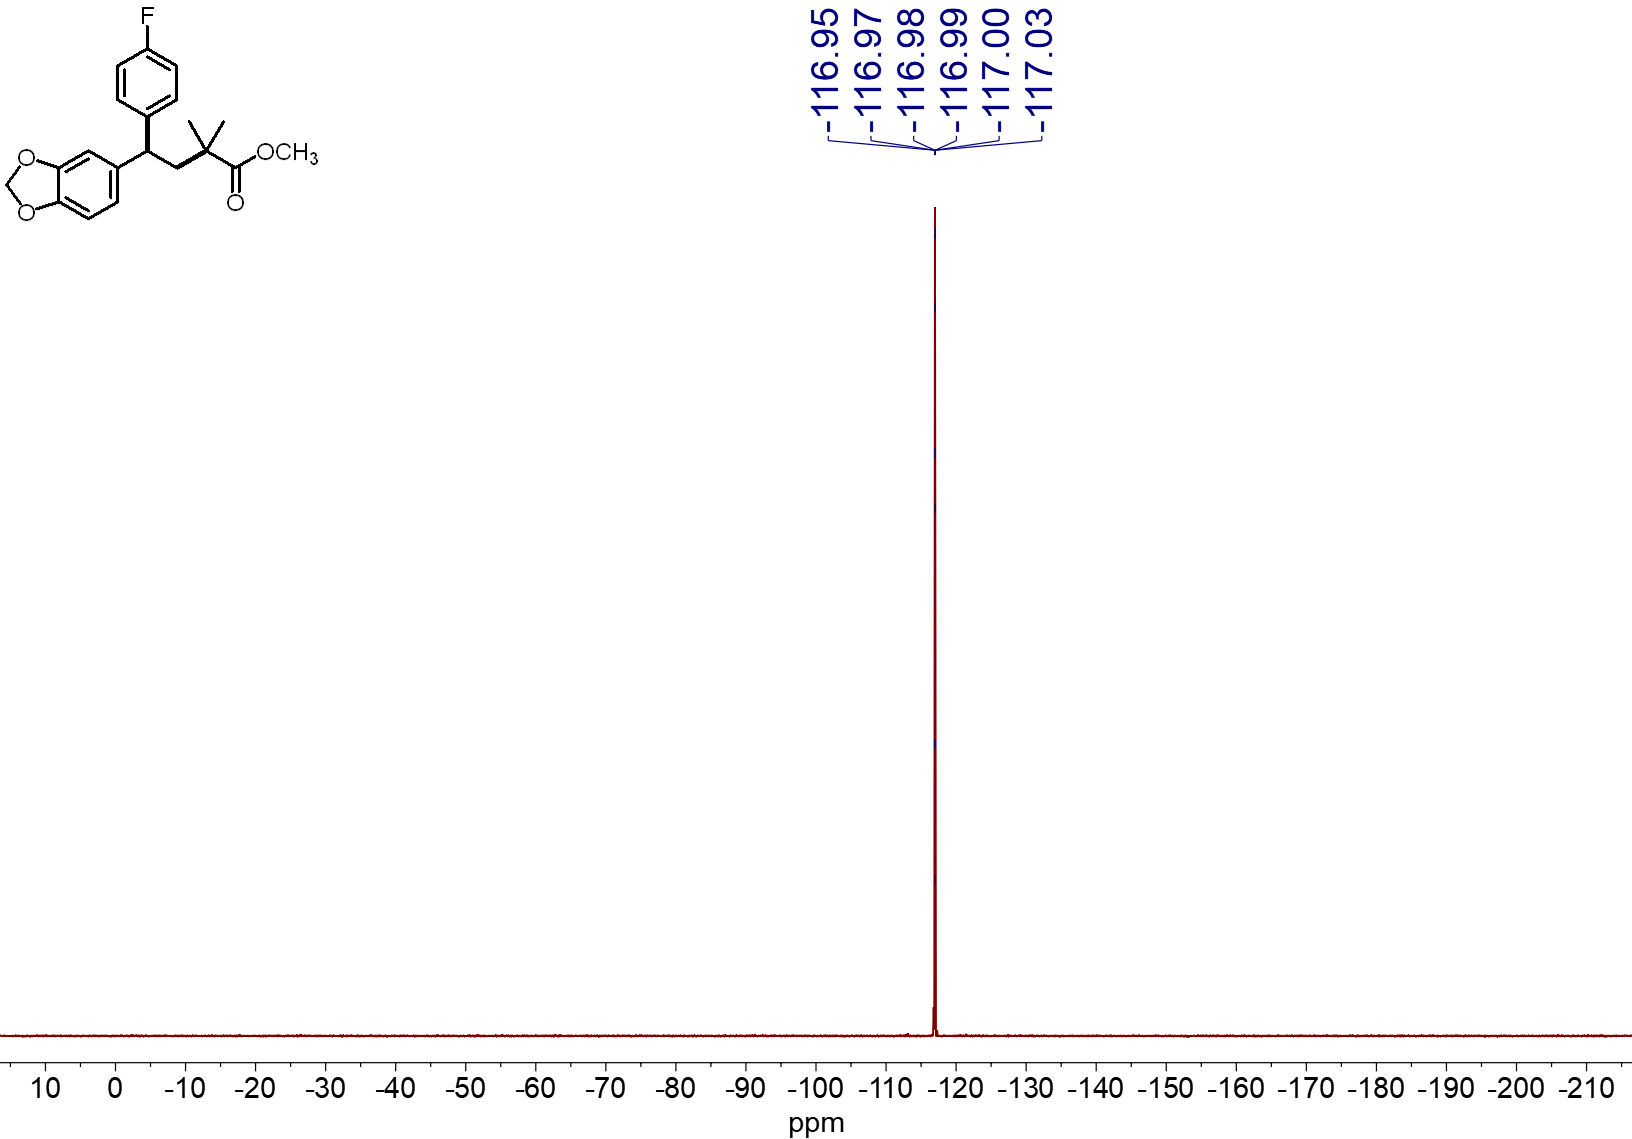


19F NMR spectrum (565 MHz, CDCl3, 23 ºC) of **4e**


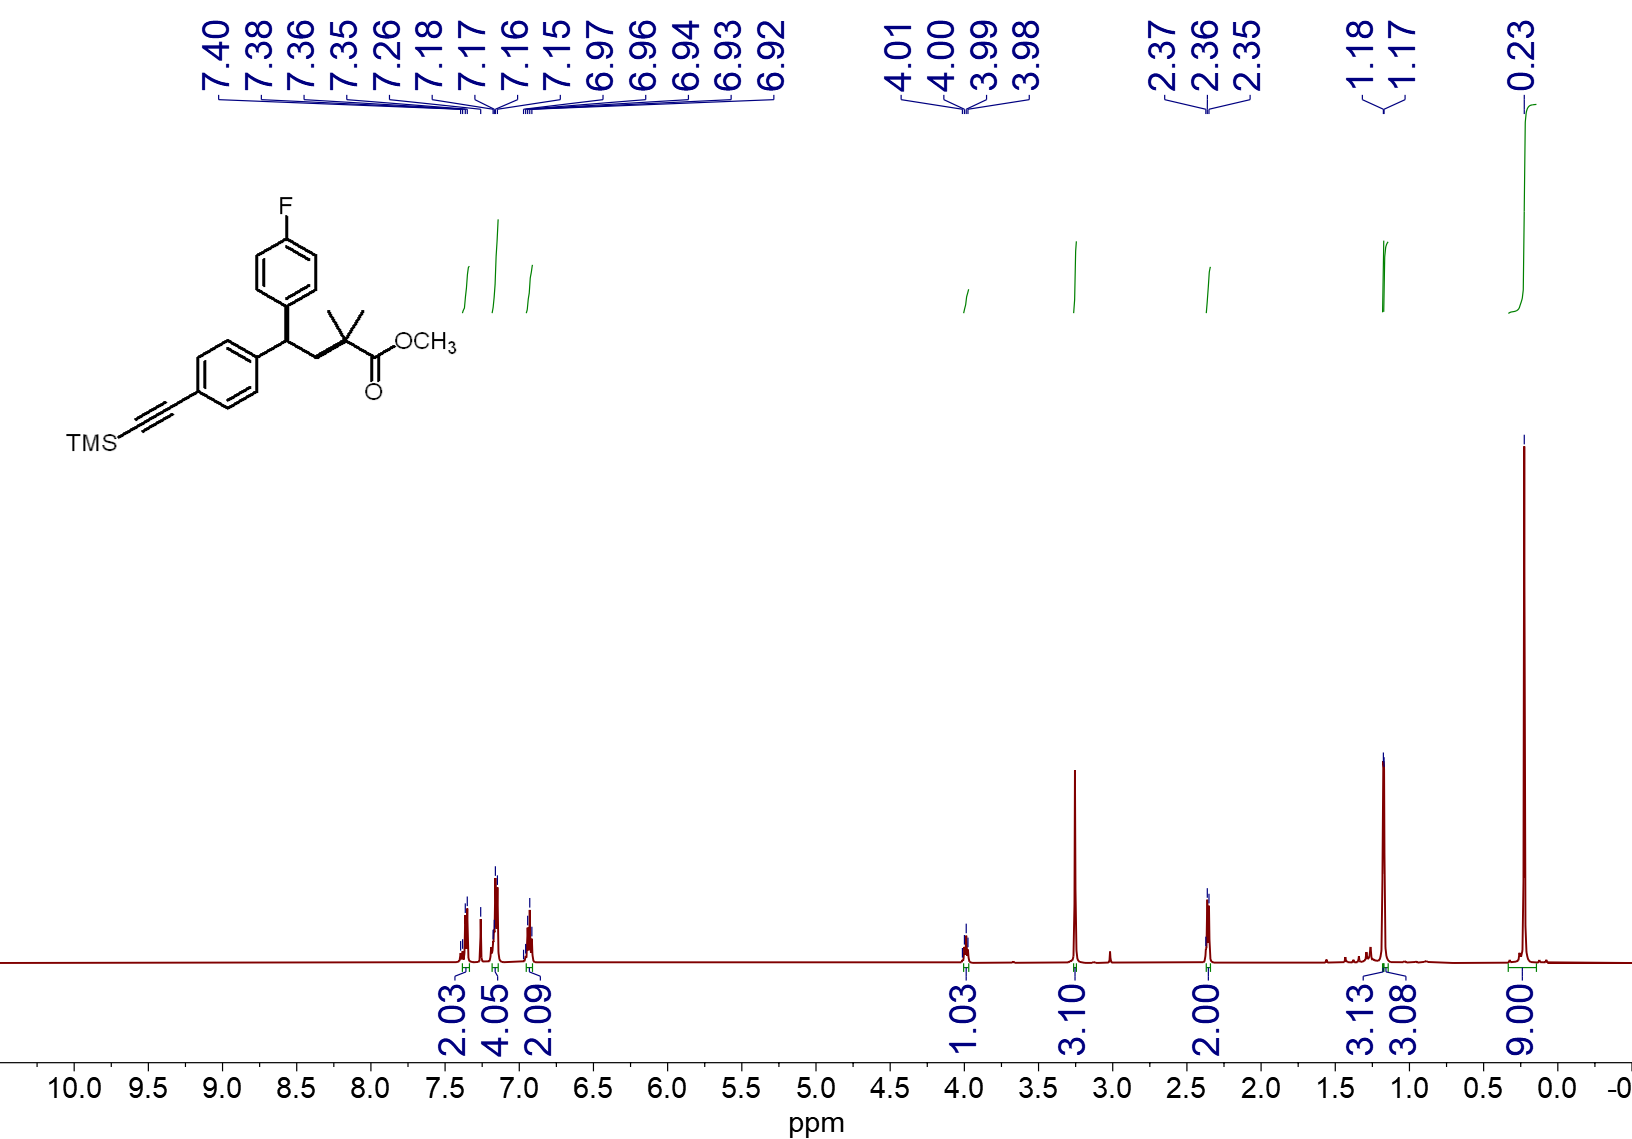


1H NMR spectrum (600 MHz, CDCl3, 23 ºC) of **4f**


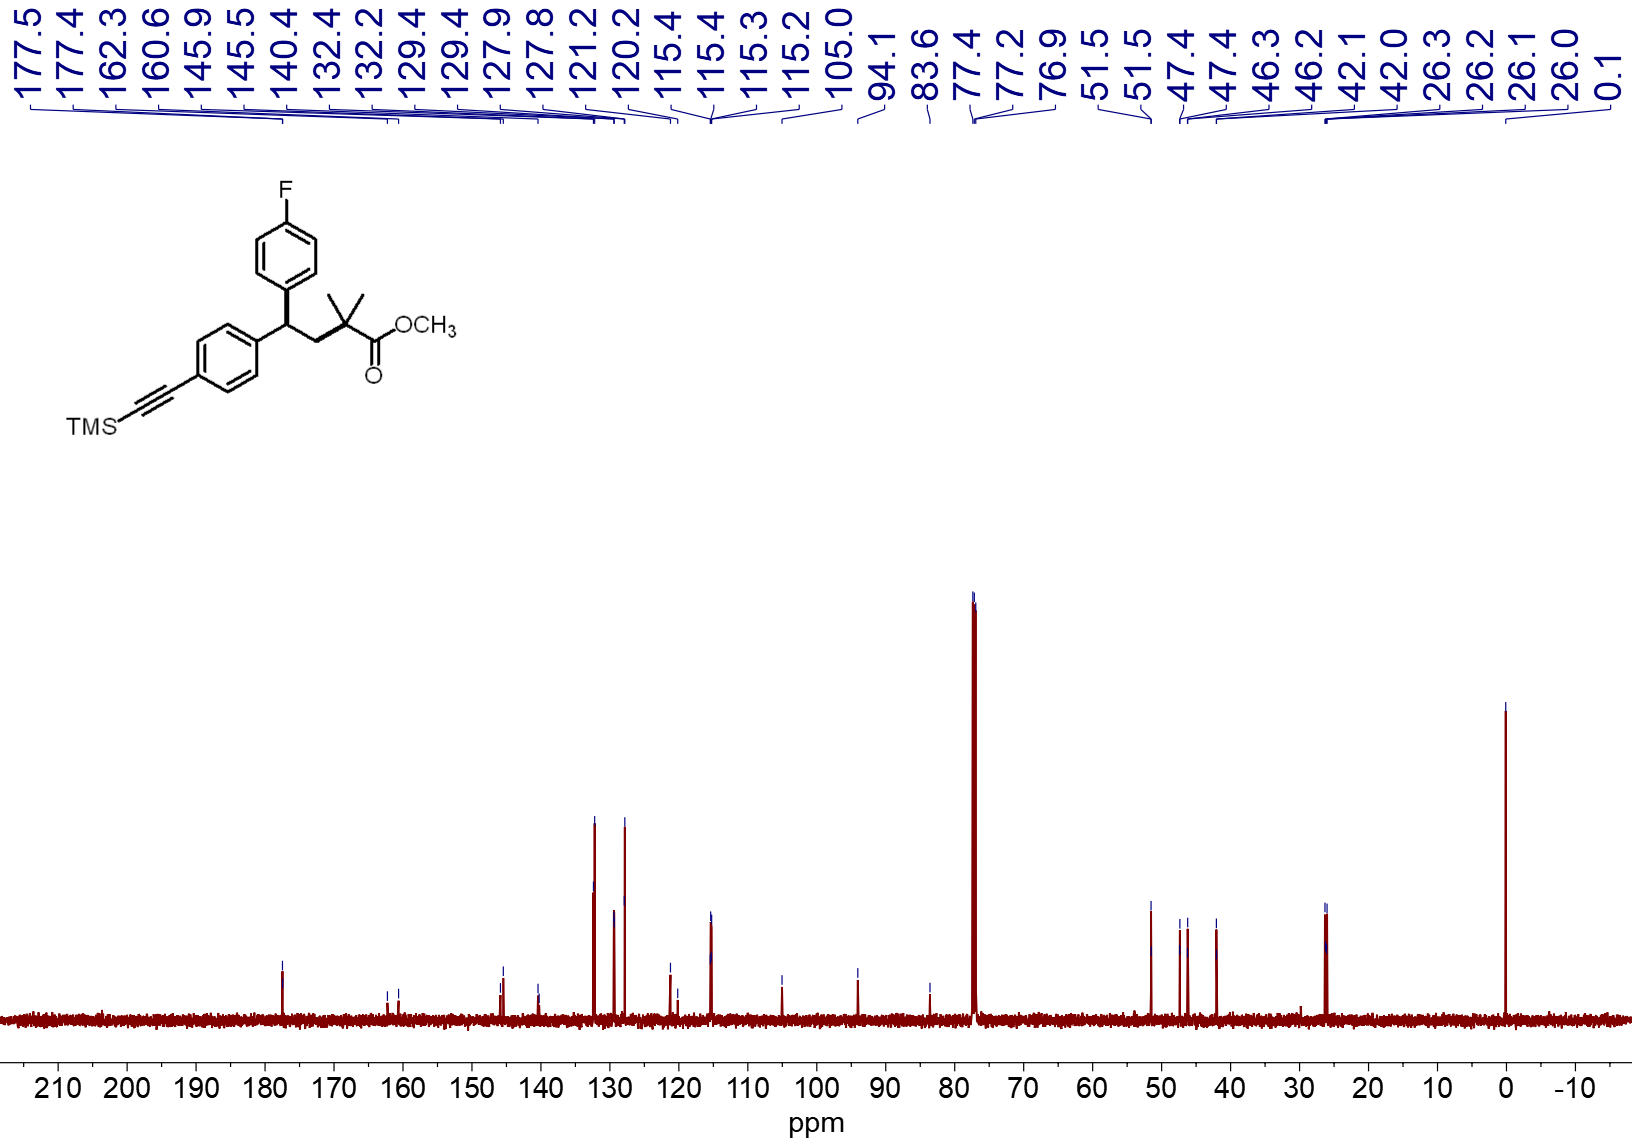


13C NMR spectrum (151 MHz, CDCl3, 23 ºC) of **4f**


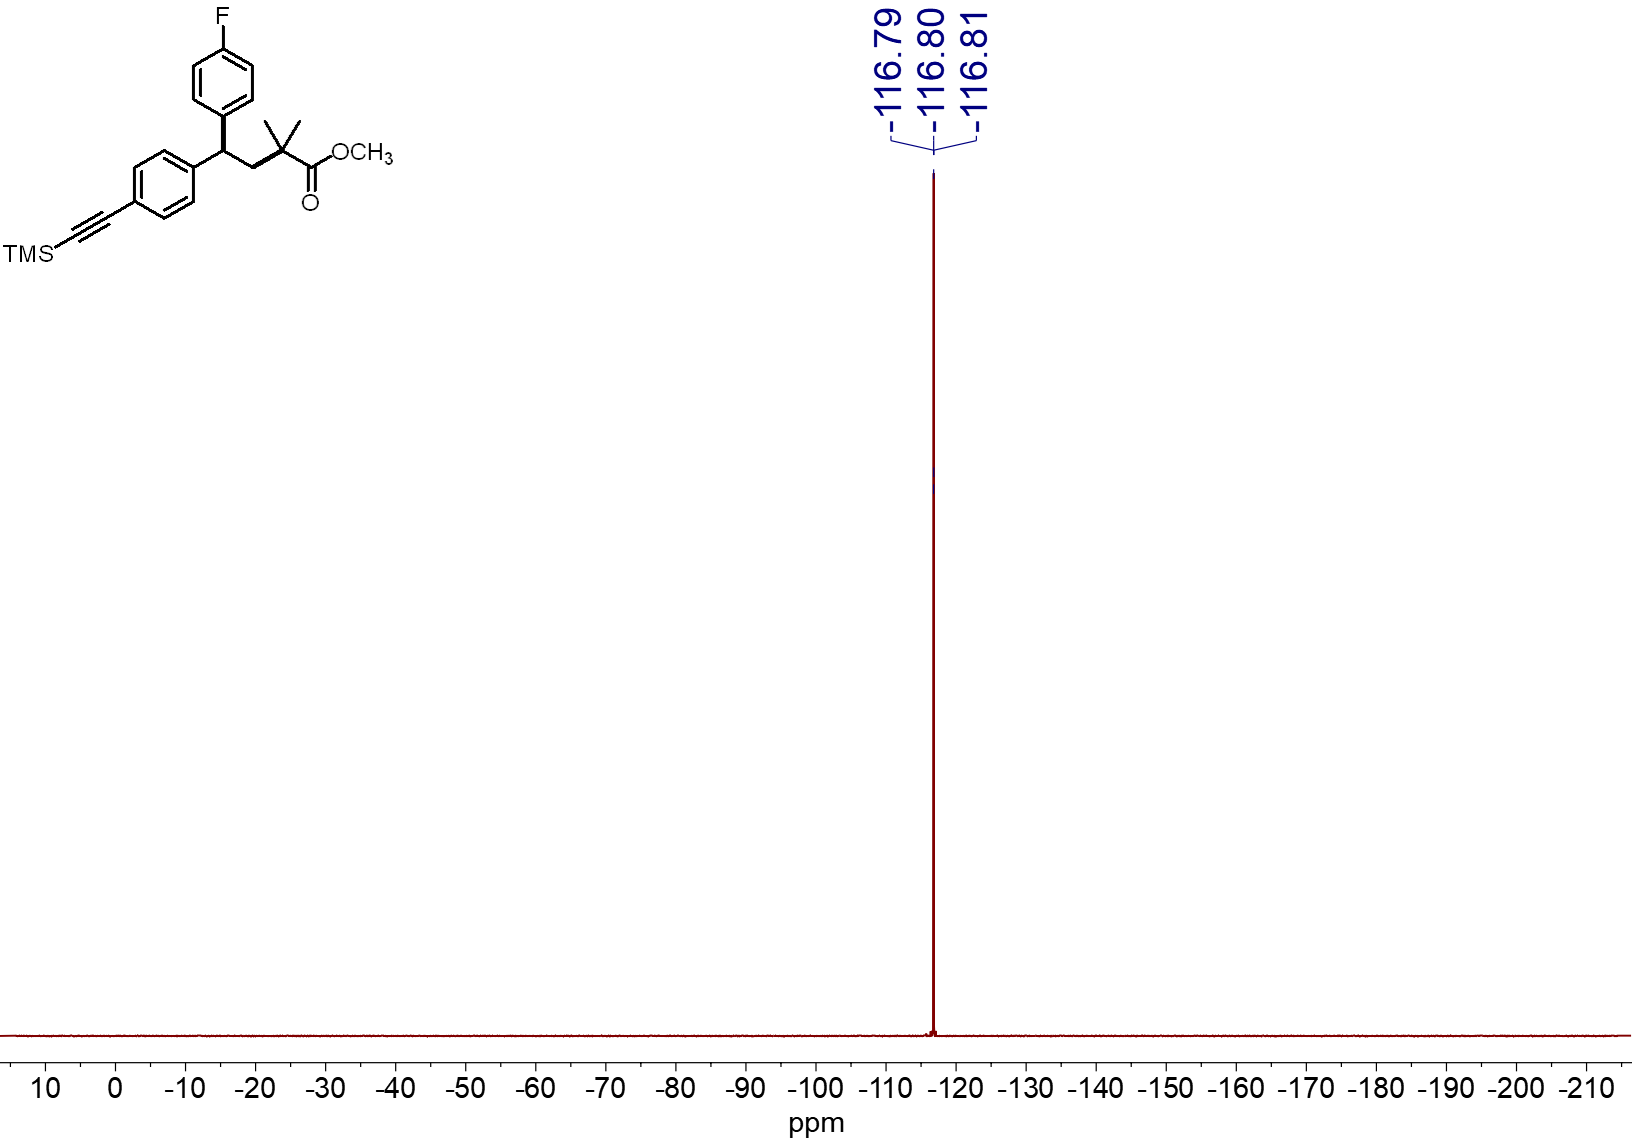


19F NMR spectrum (565 MHz, CDCl3, 23 ºC) of **4f**


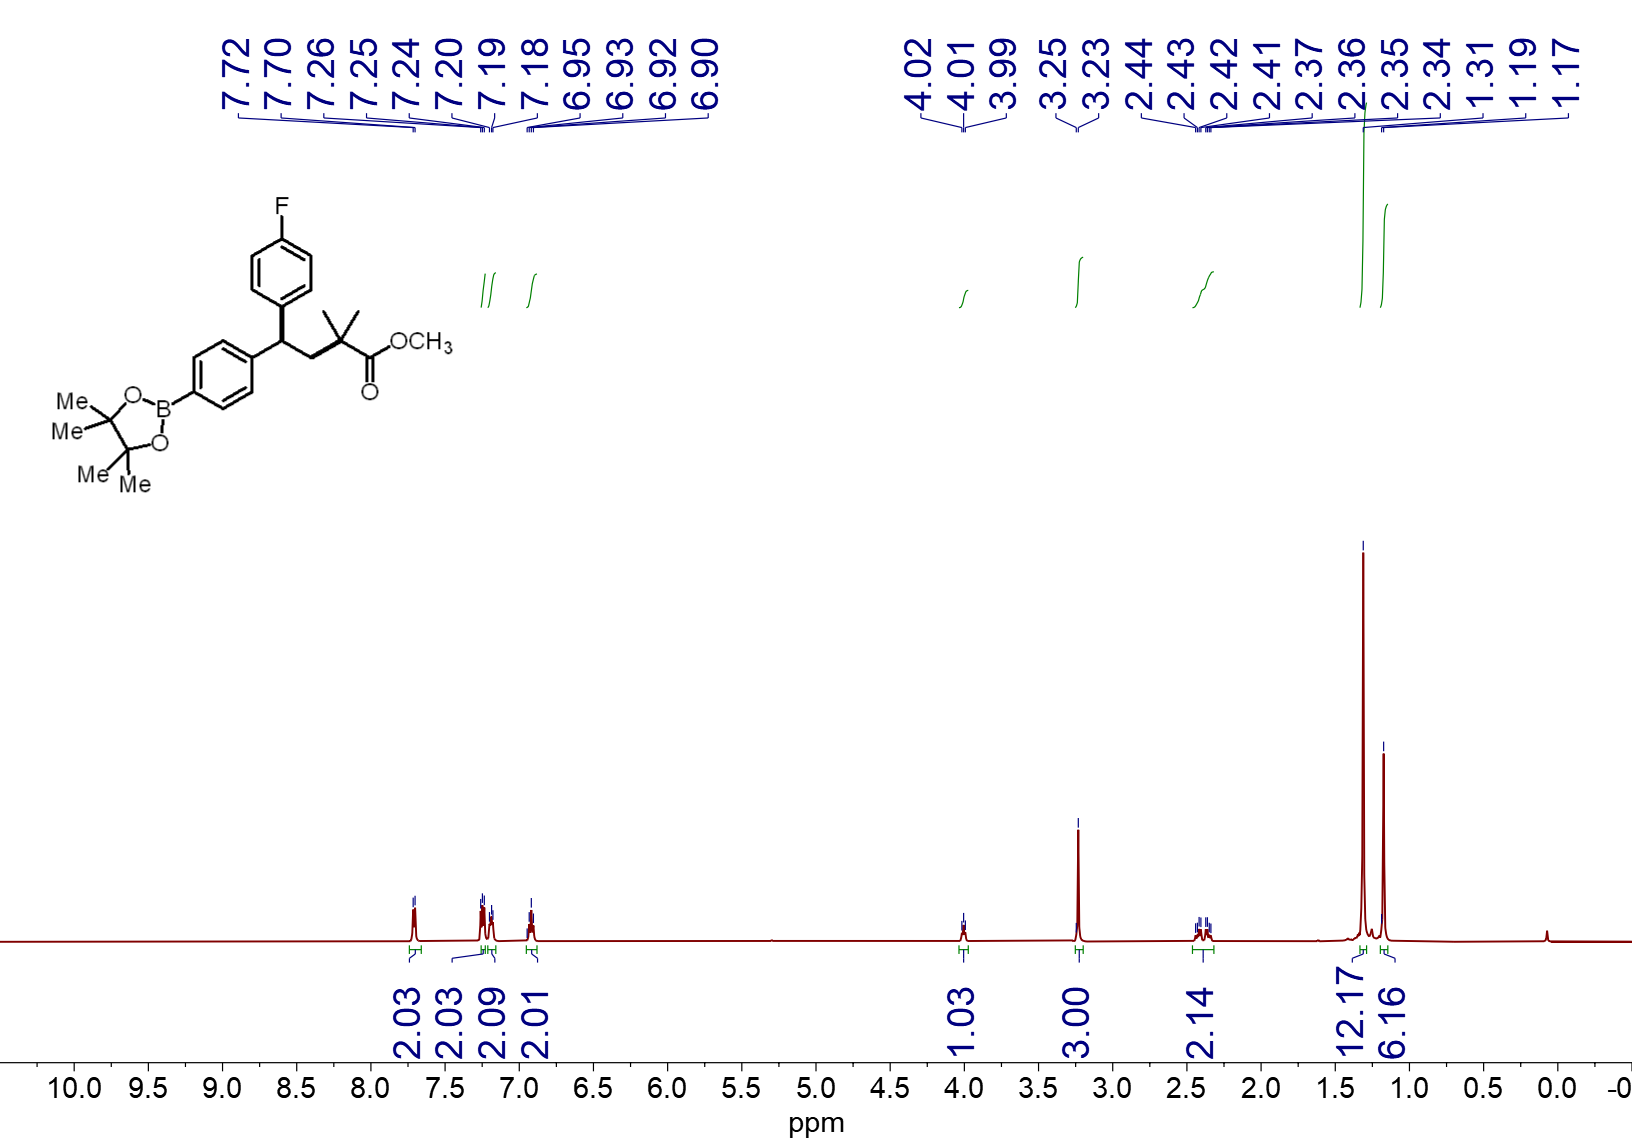


1H NMR spectrum (600 MHz, CDCl3, 23 ºC) of **4g**


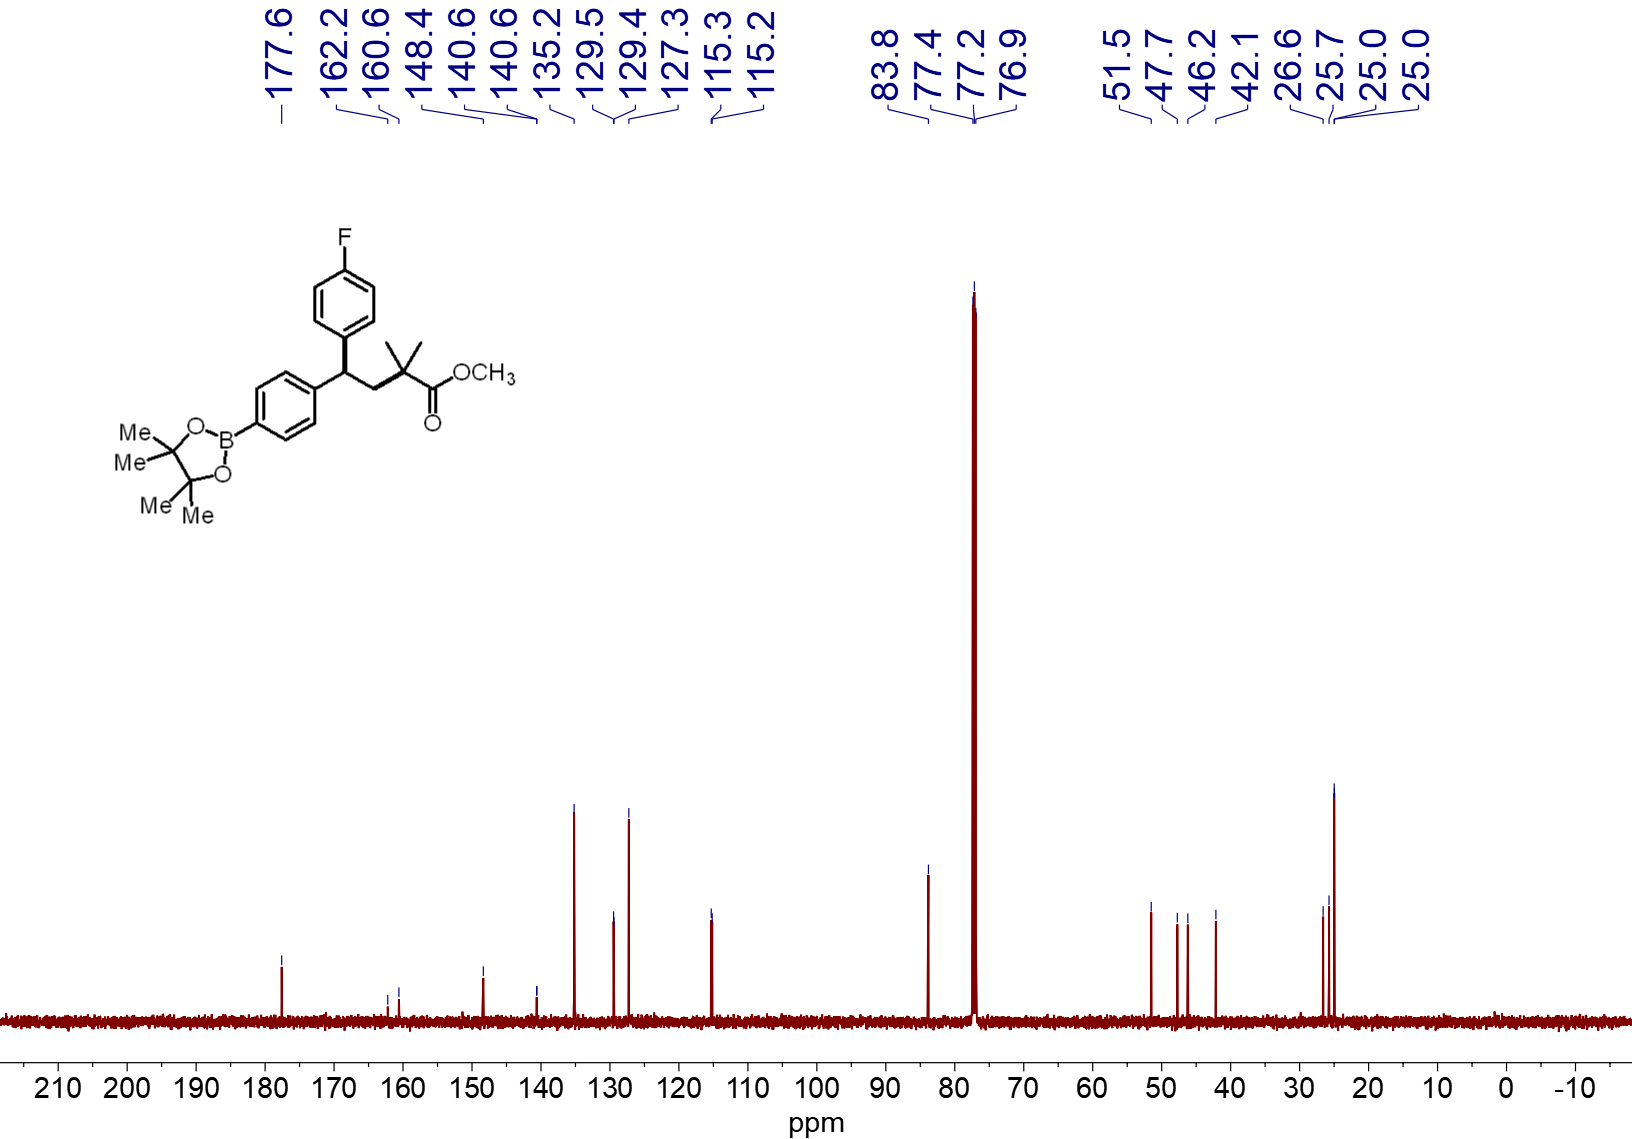


13C NMR spectrum (151 MHz, CDCl3, 23 ºC) of **4g**


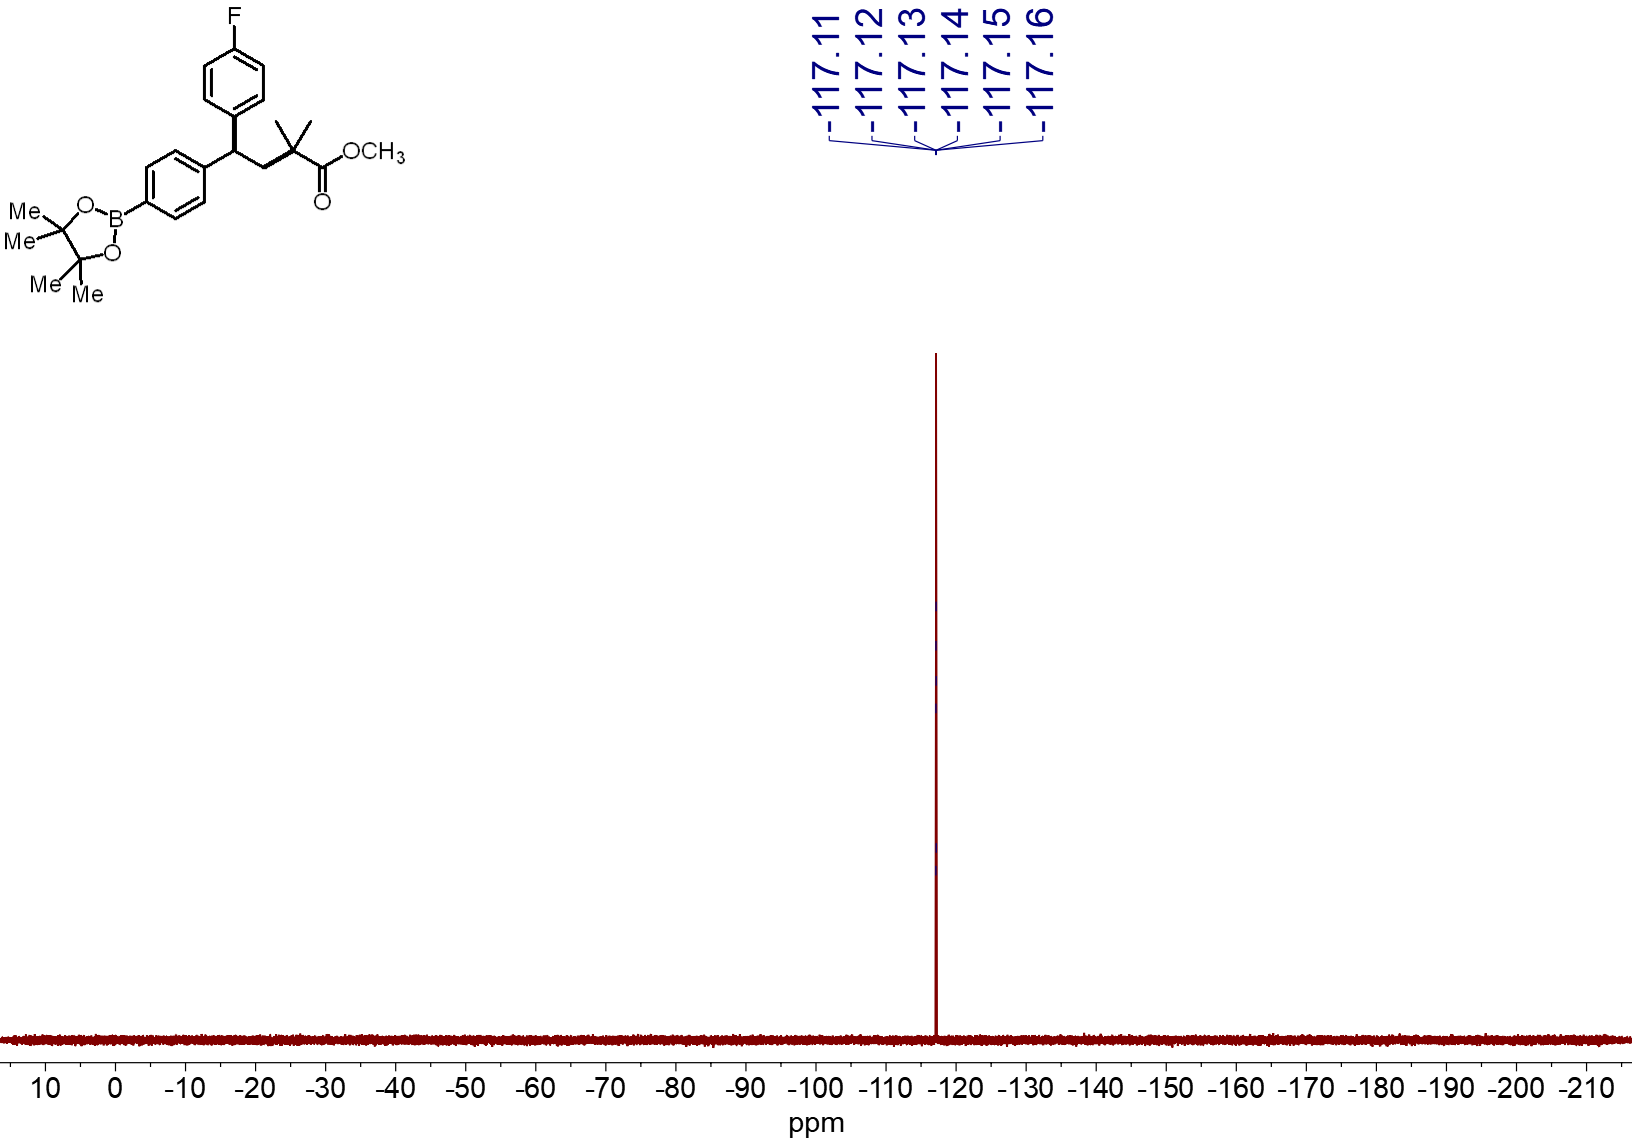


19F NMR spectrum (565 MHz, CDCl3, 23 ºC) of **4g**


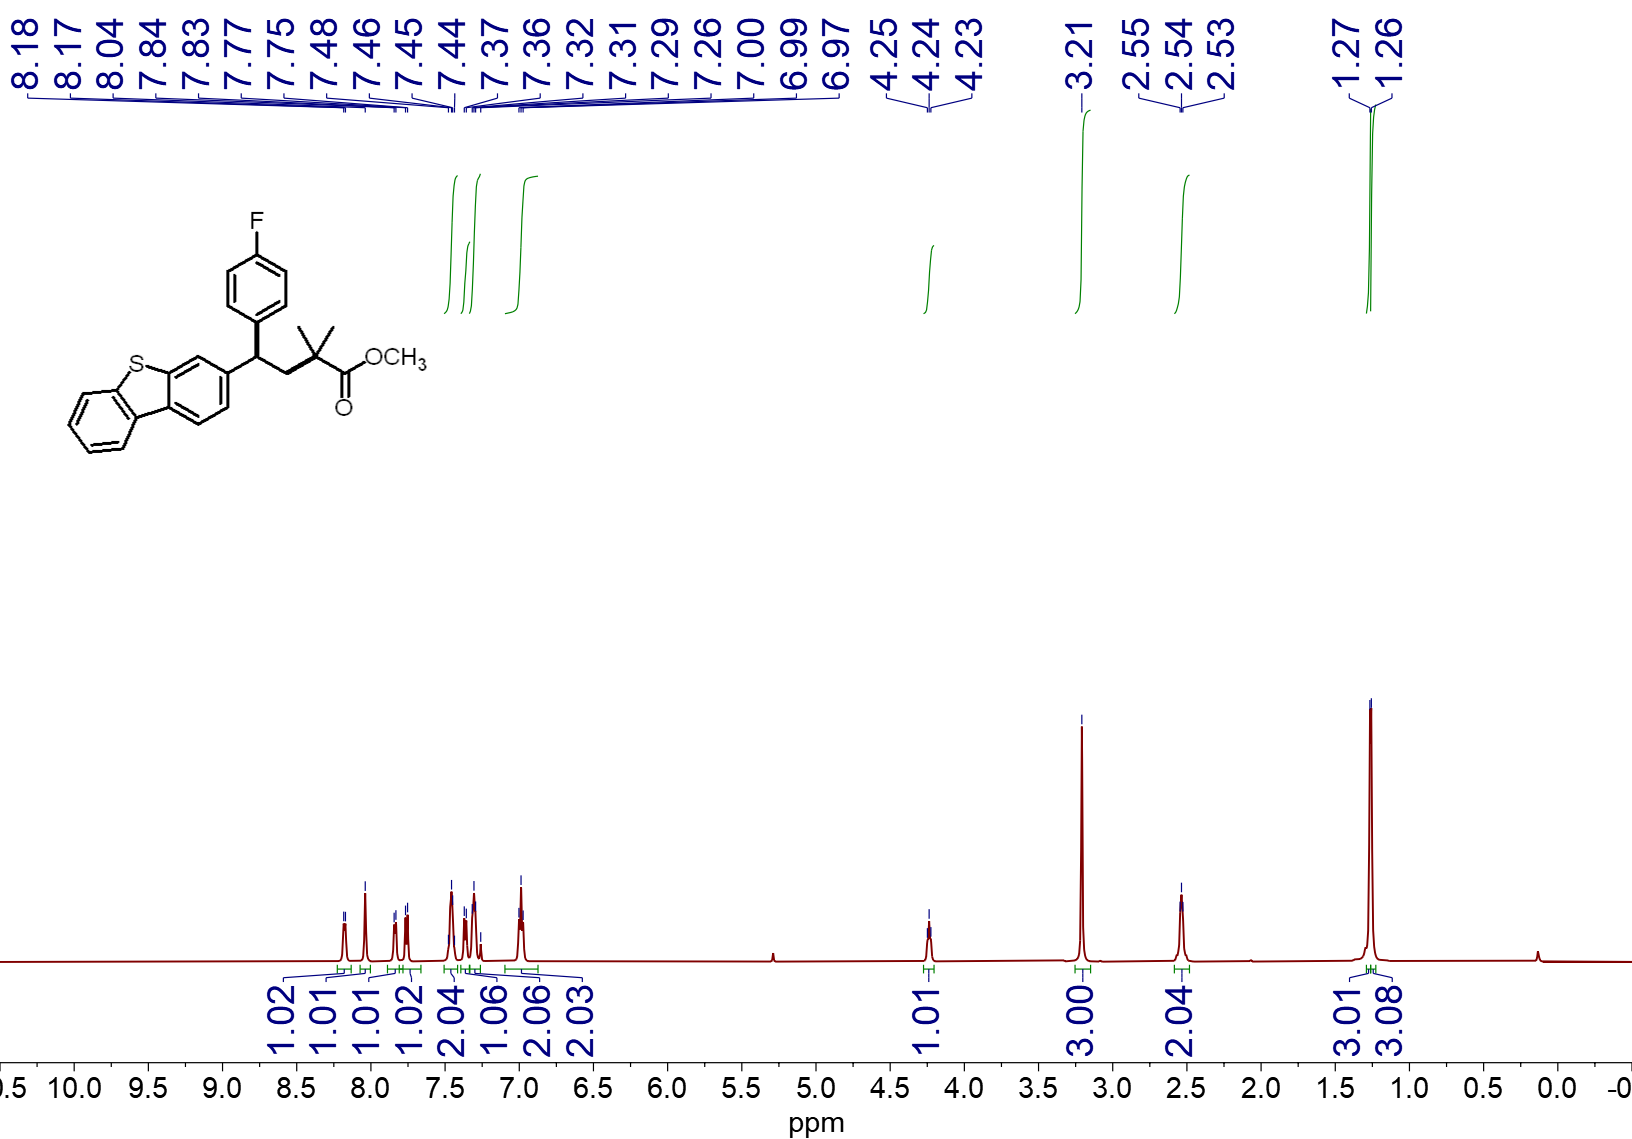


1H NMR spectrum (600 MHz, CDCl3, 23 ºC) of **4h**


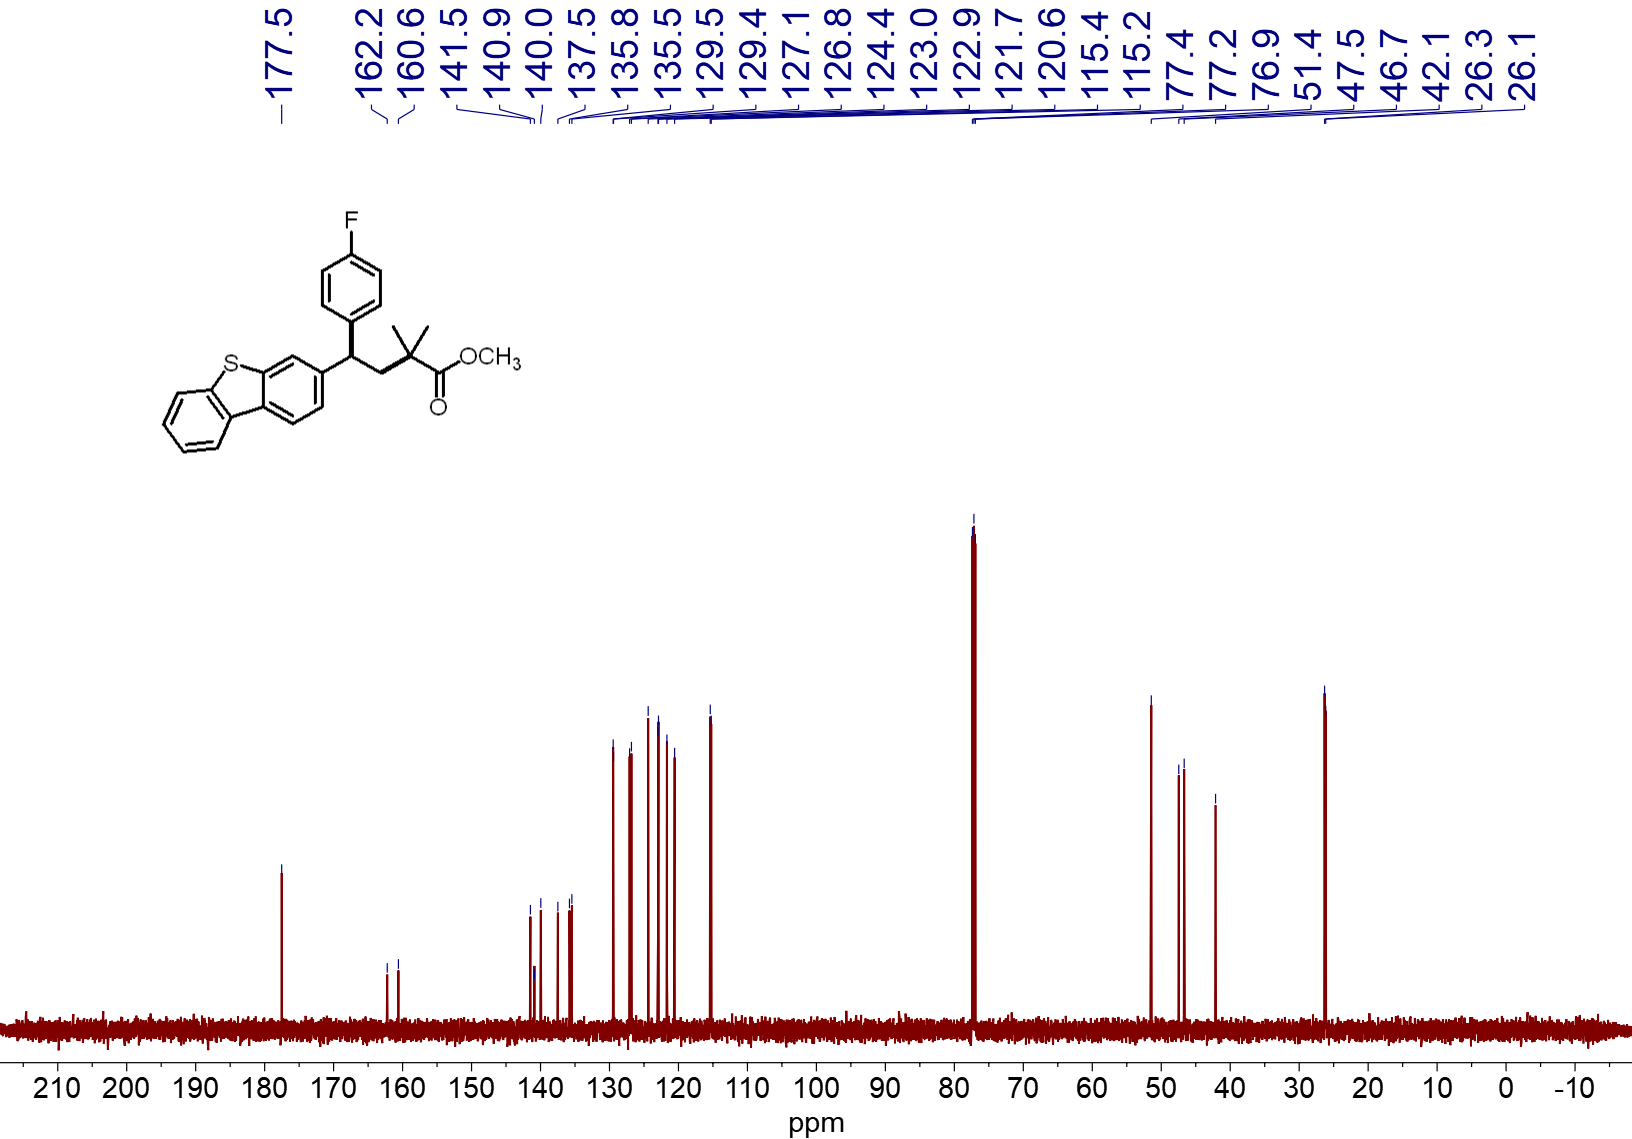


13C NMR spectrum (151 MHz, CDCl3, 23 ºC) of **4h**


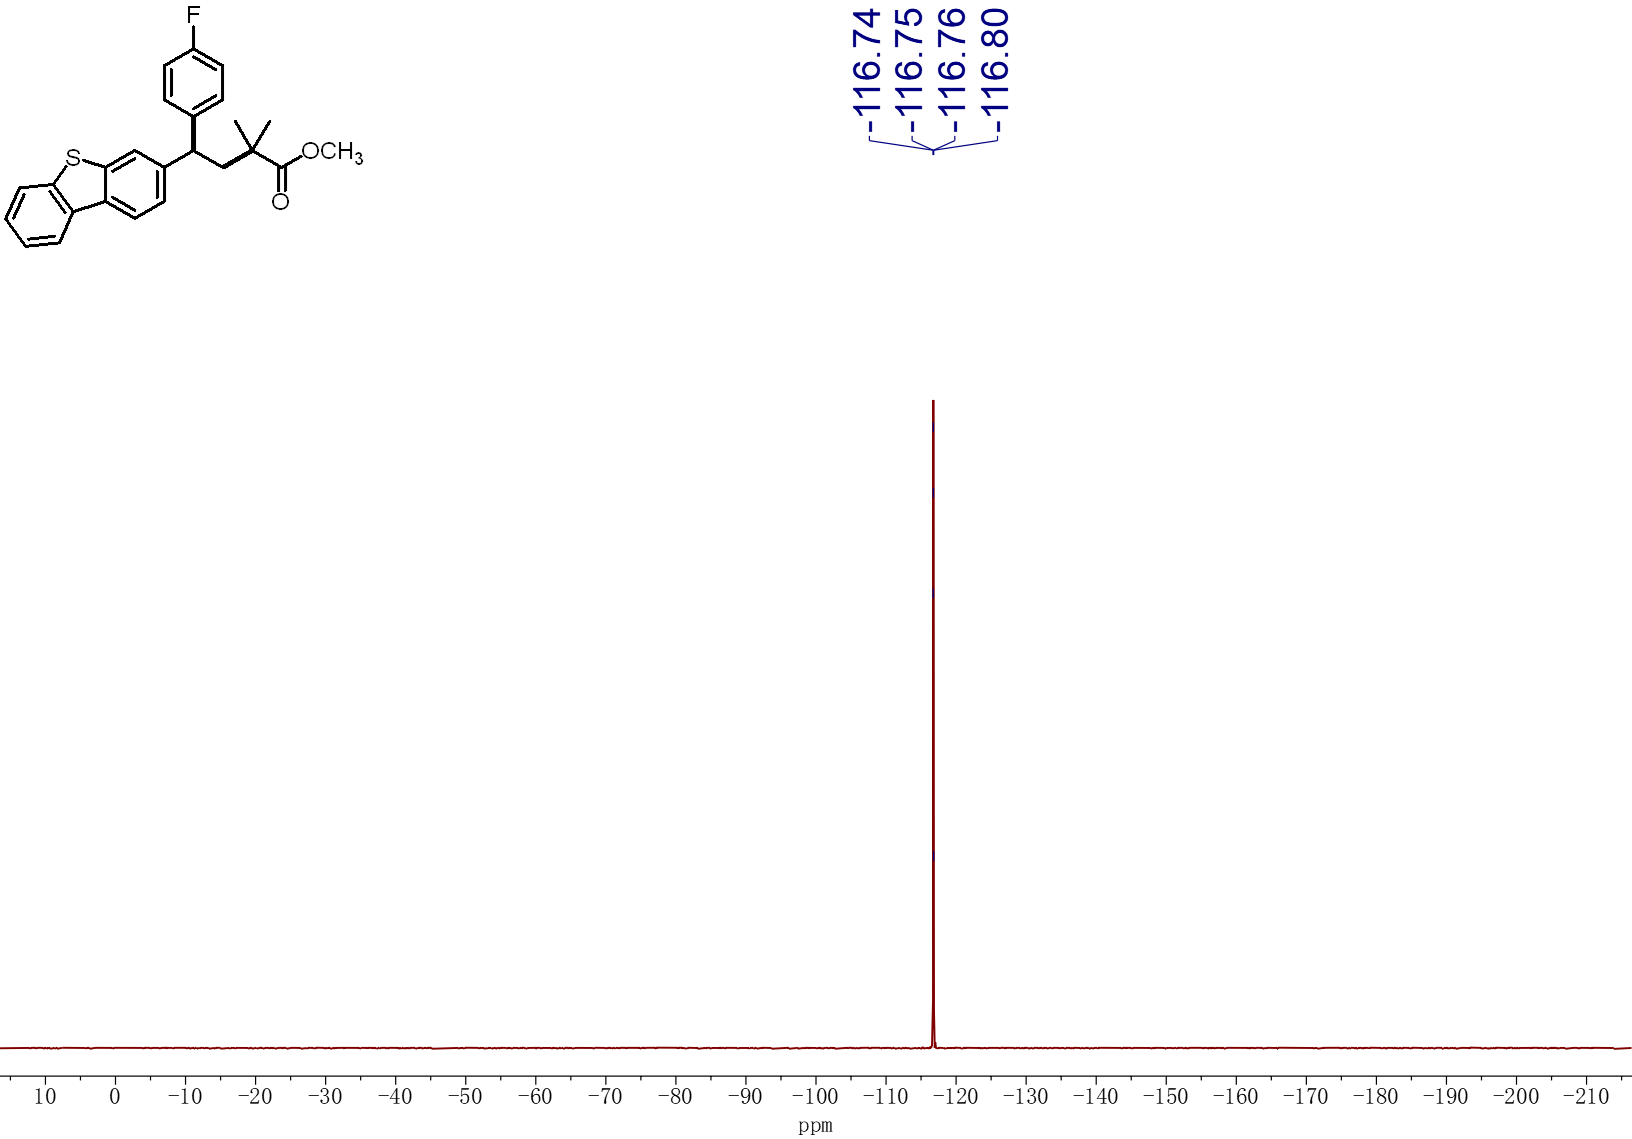


19F NMR spectrum (565 MHz, CDCl3, 23 ºC) of **4h**


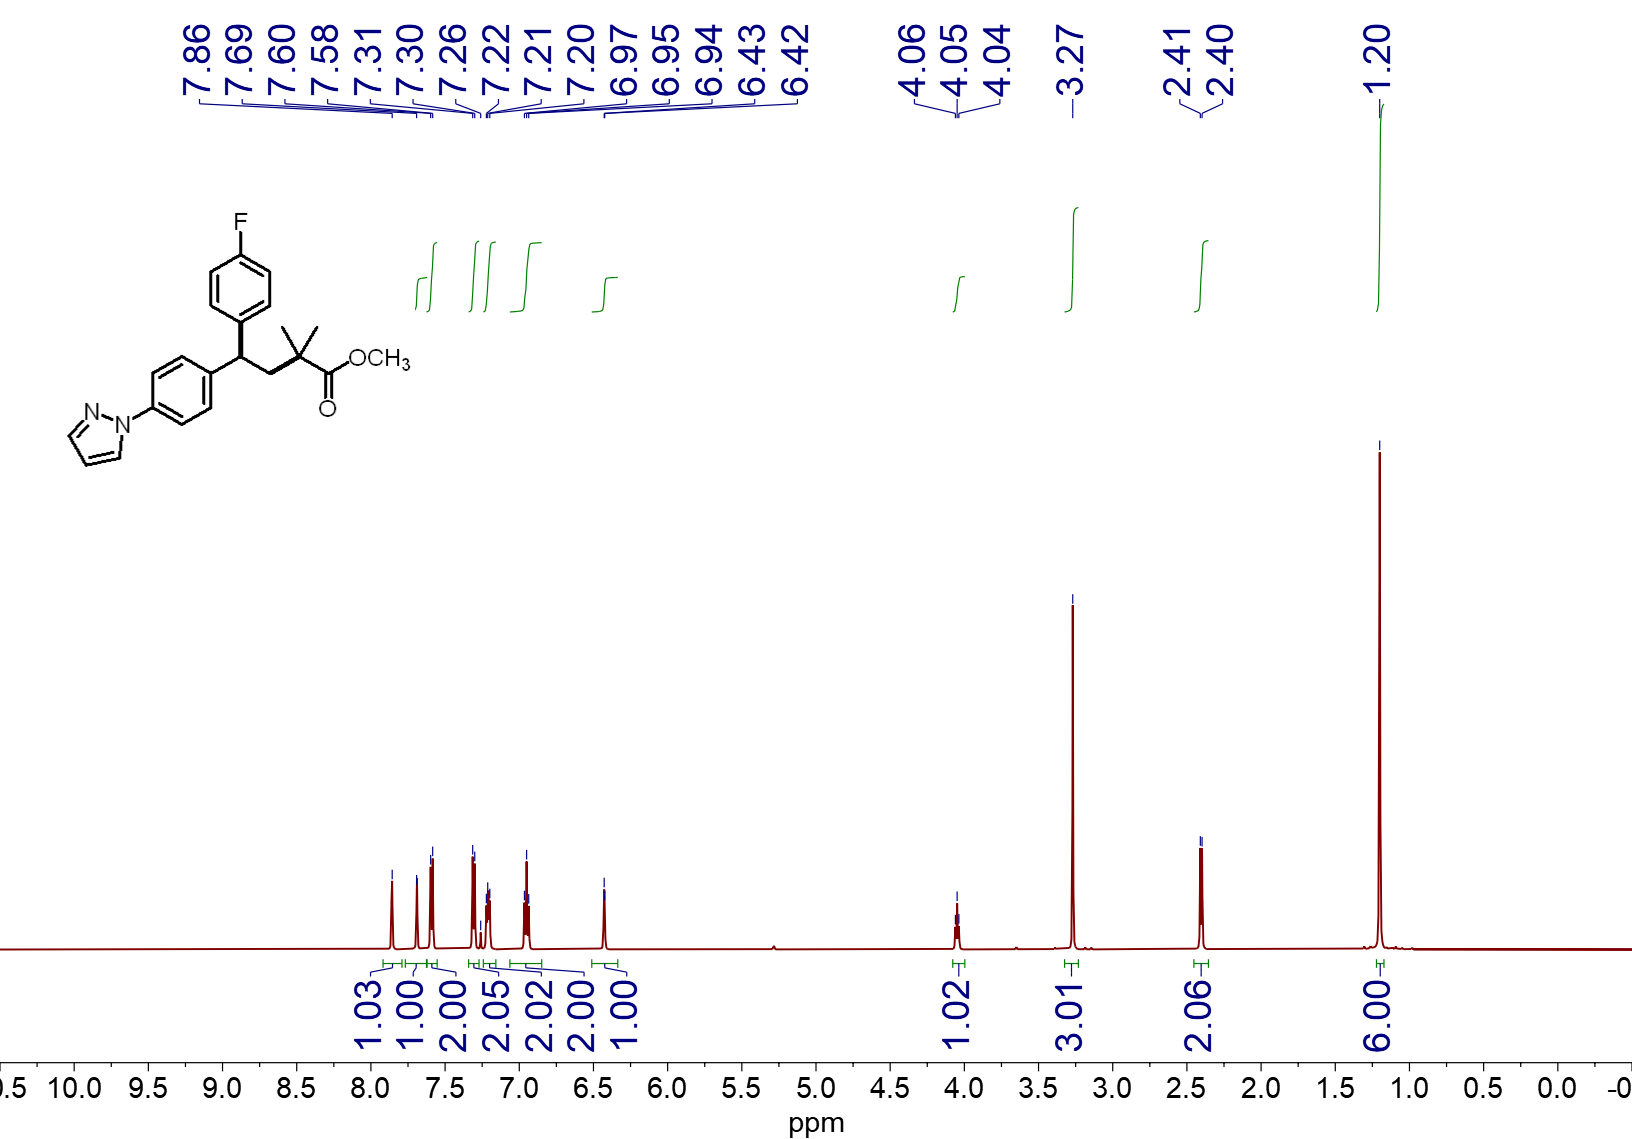


1H NMR spectrum (600 MHz, CDCl3, 23 ºC) of **4i**


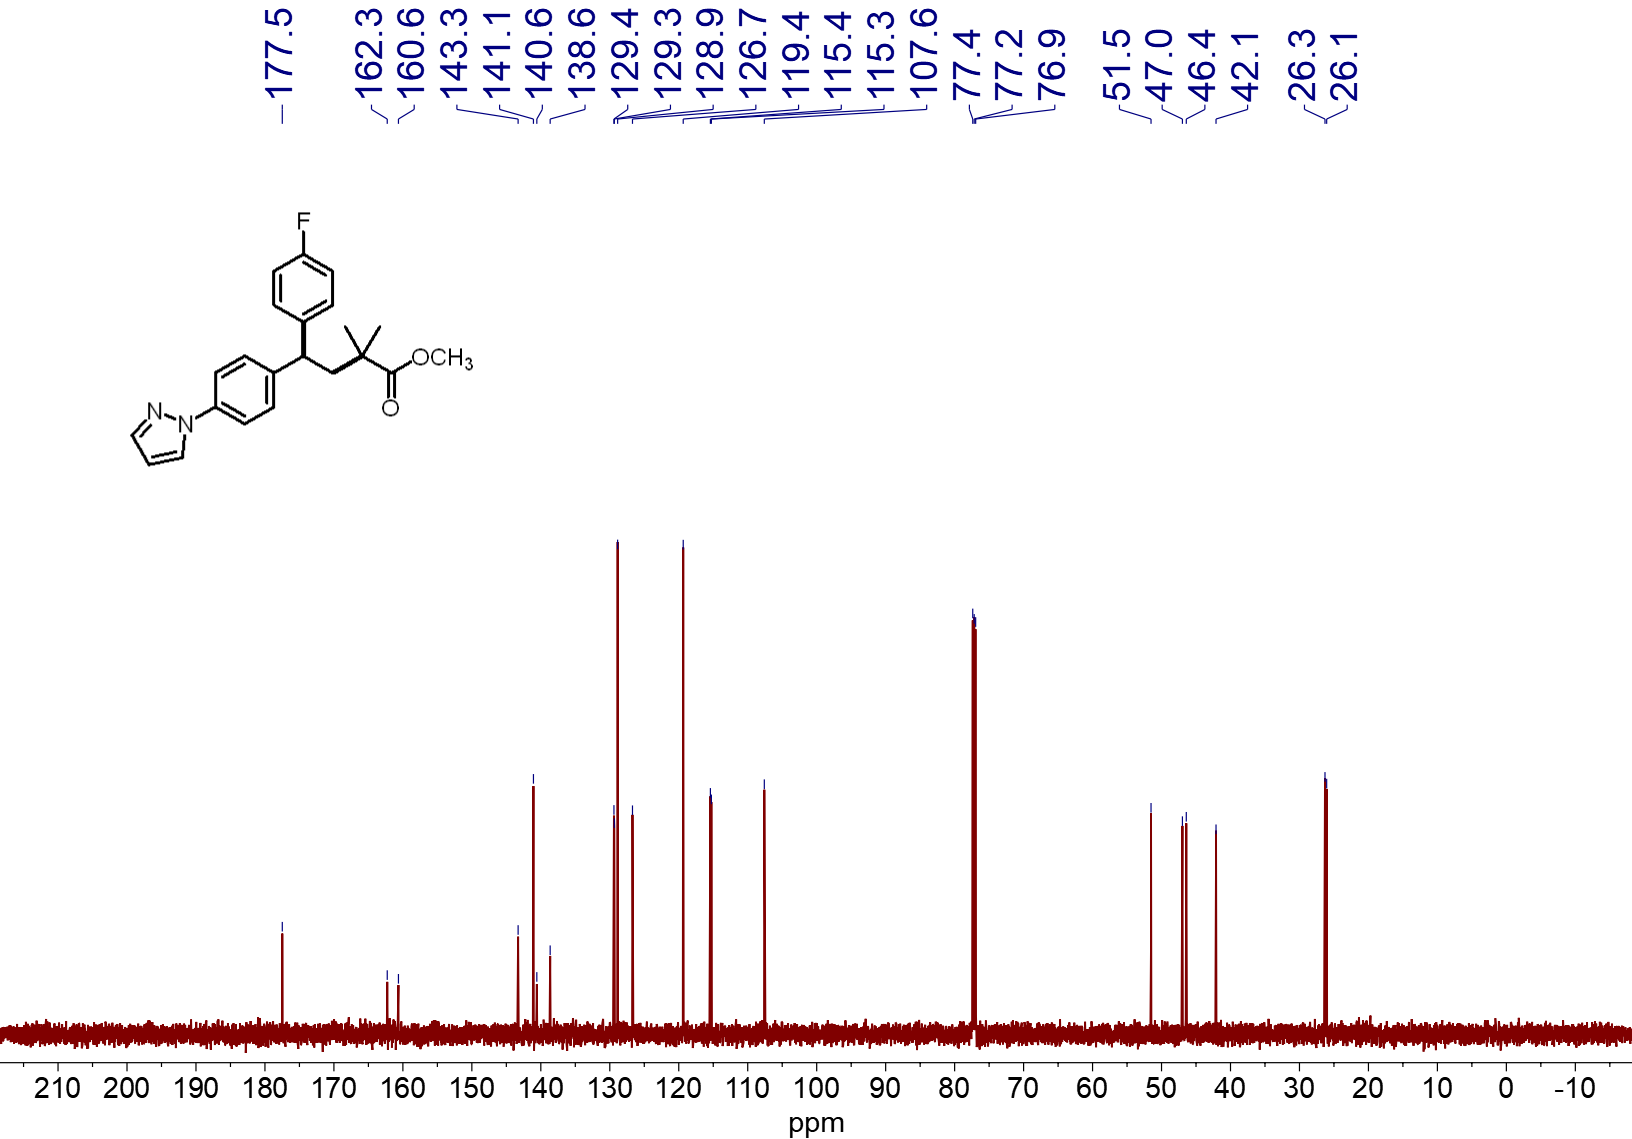


13C NMR spectrum (151 MHz, CDCl3, 23 ºC) of **4i**


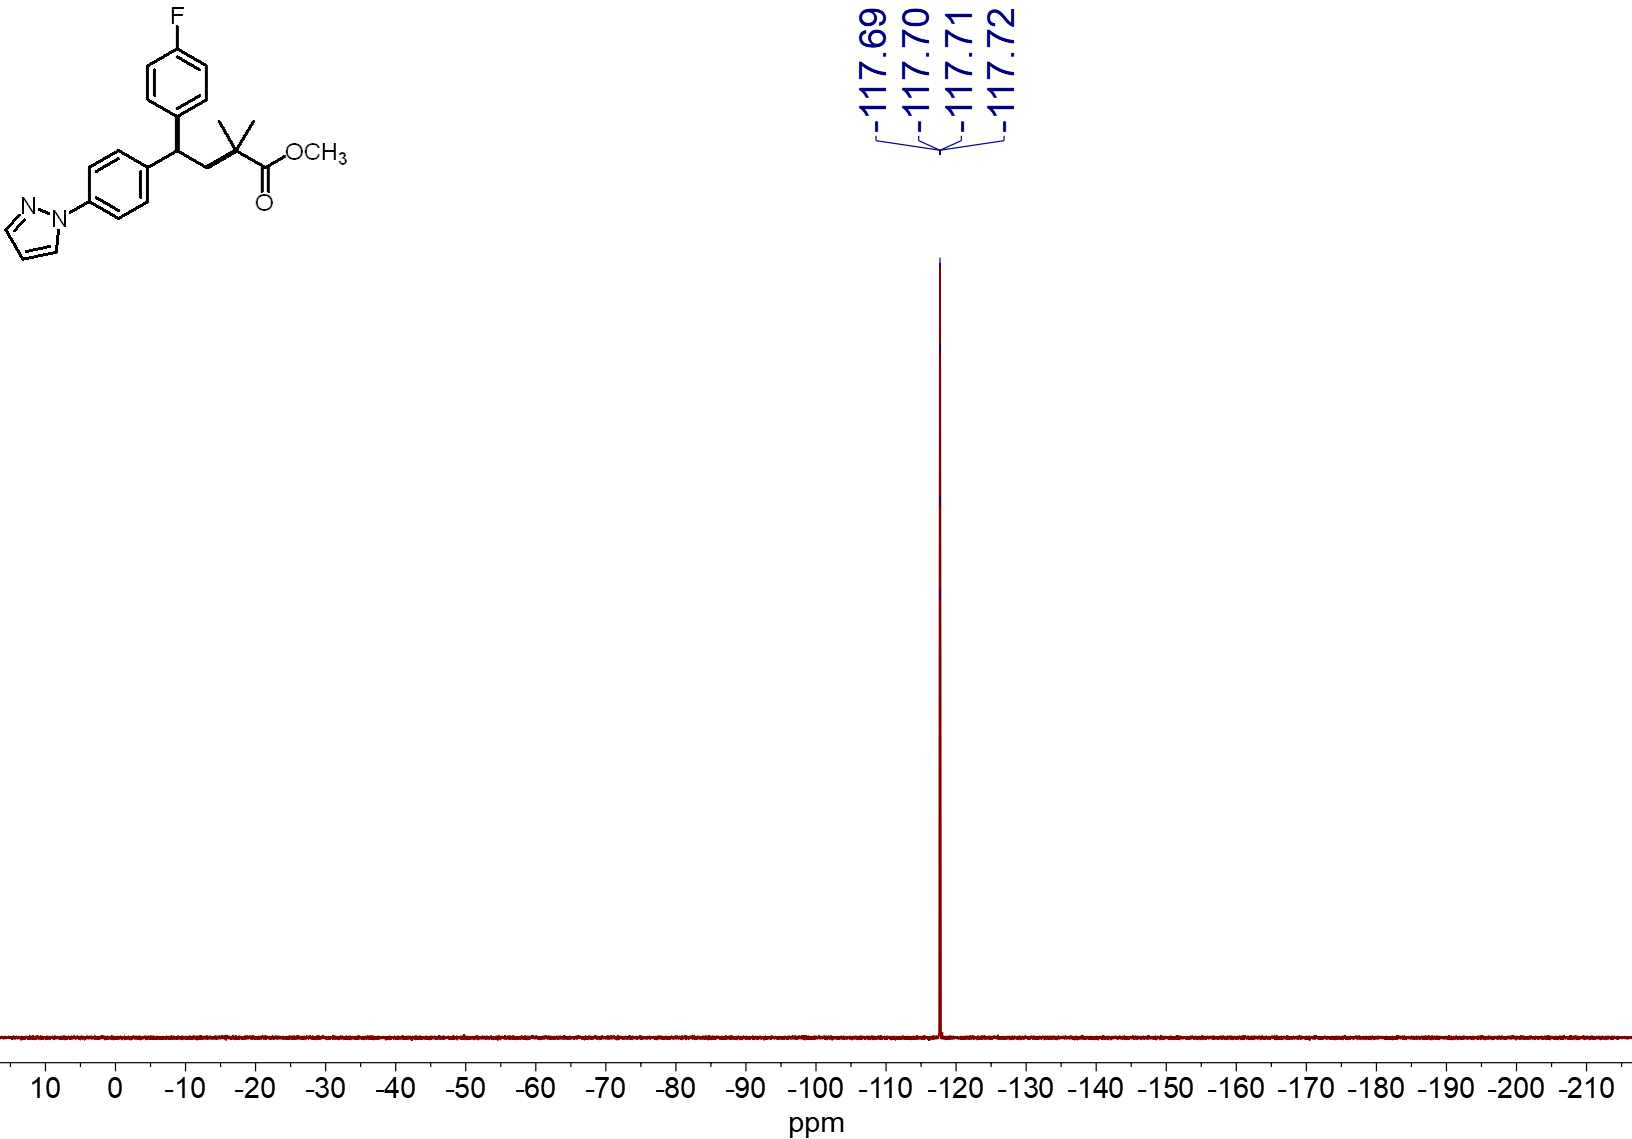


19F NMR spectrum (565 MHz, CDCl3, 23 ºC) of **4i**


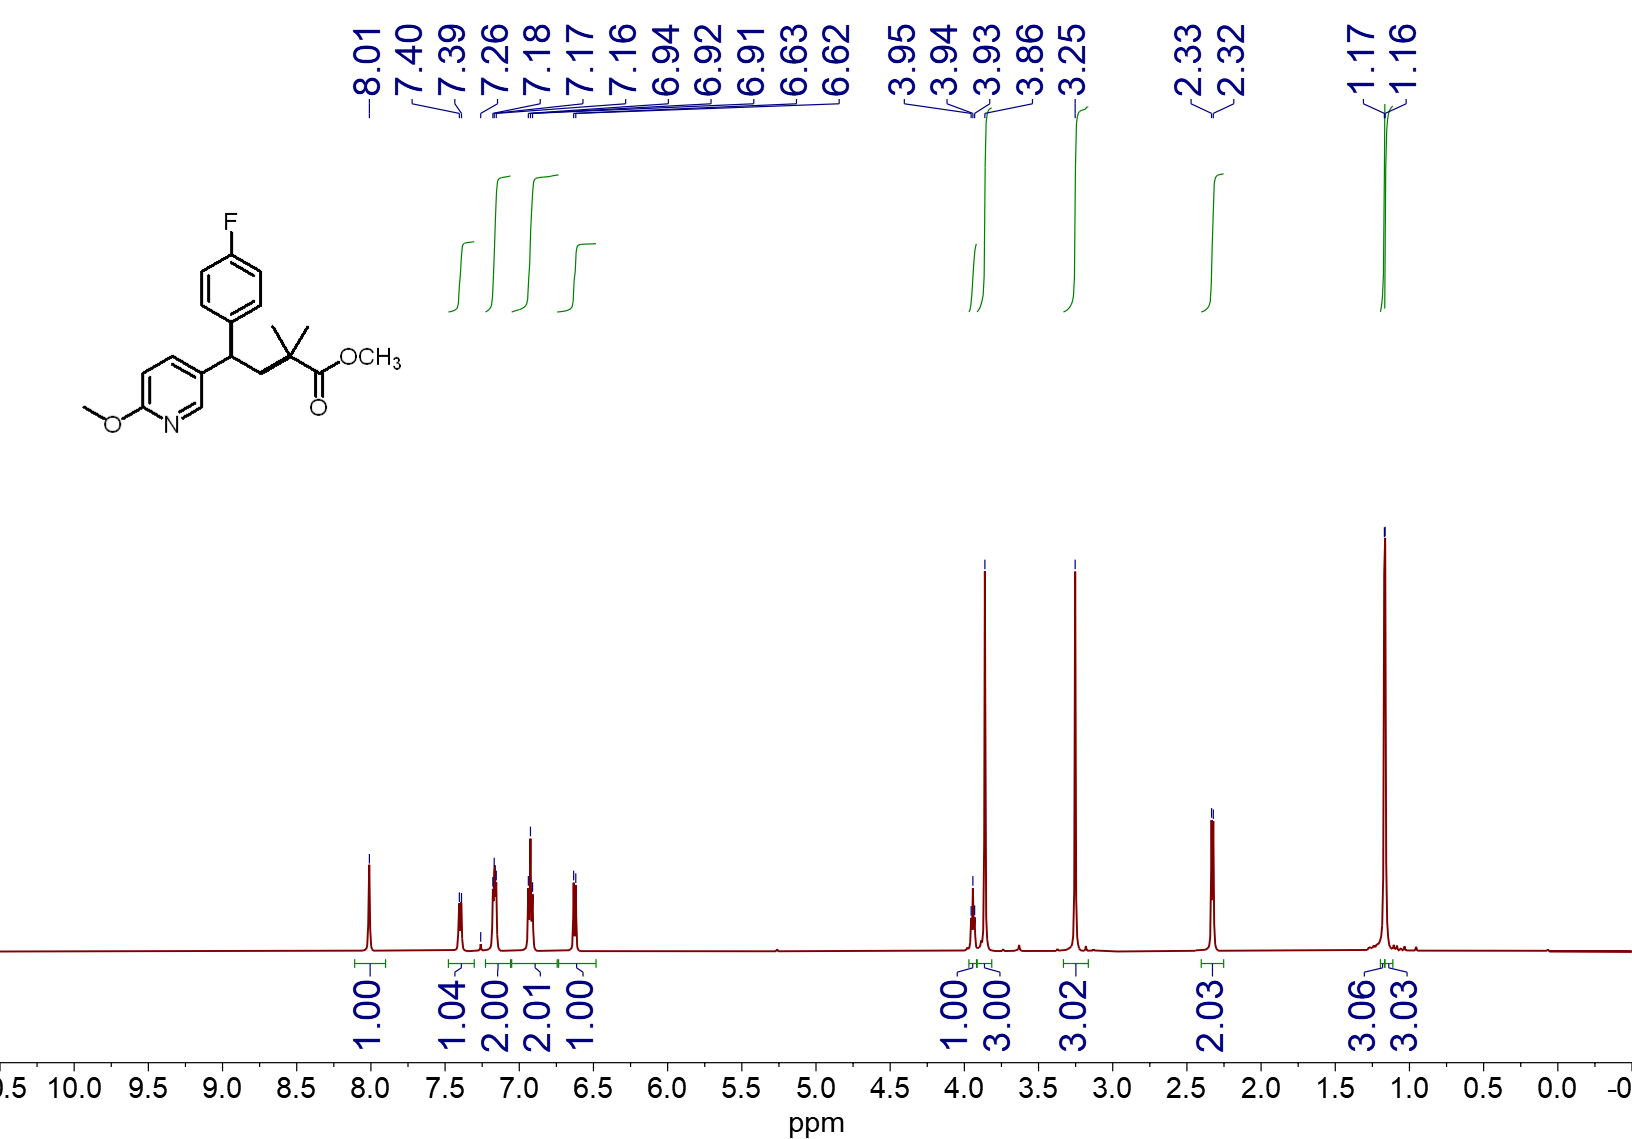


1H NMR spectrum (600 MHz, CDCl3, 23 ºC) of **4j**


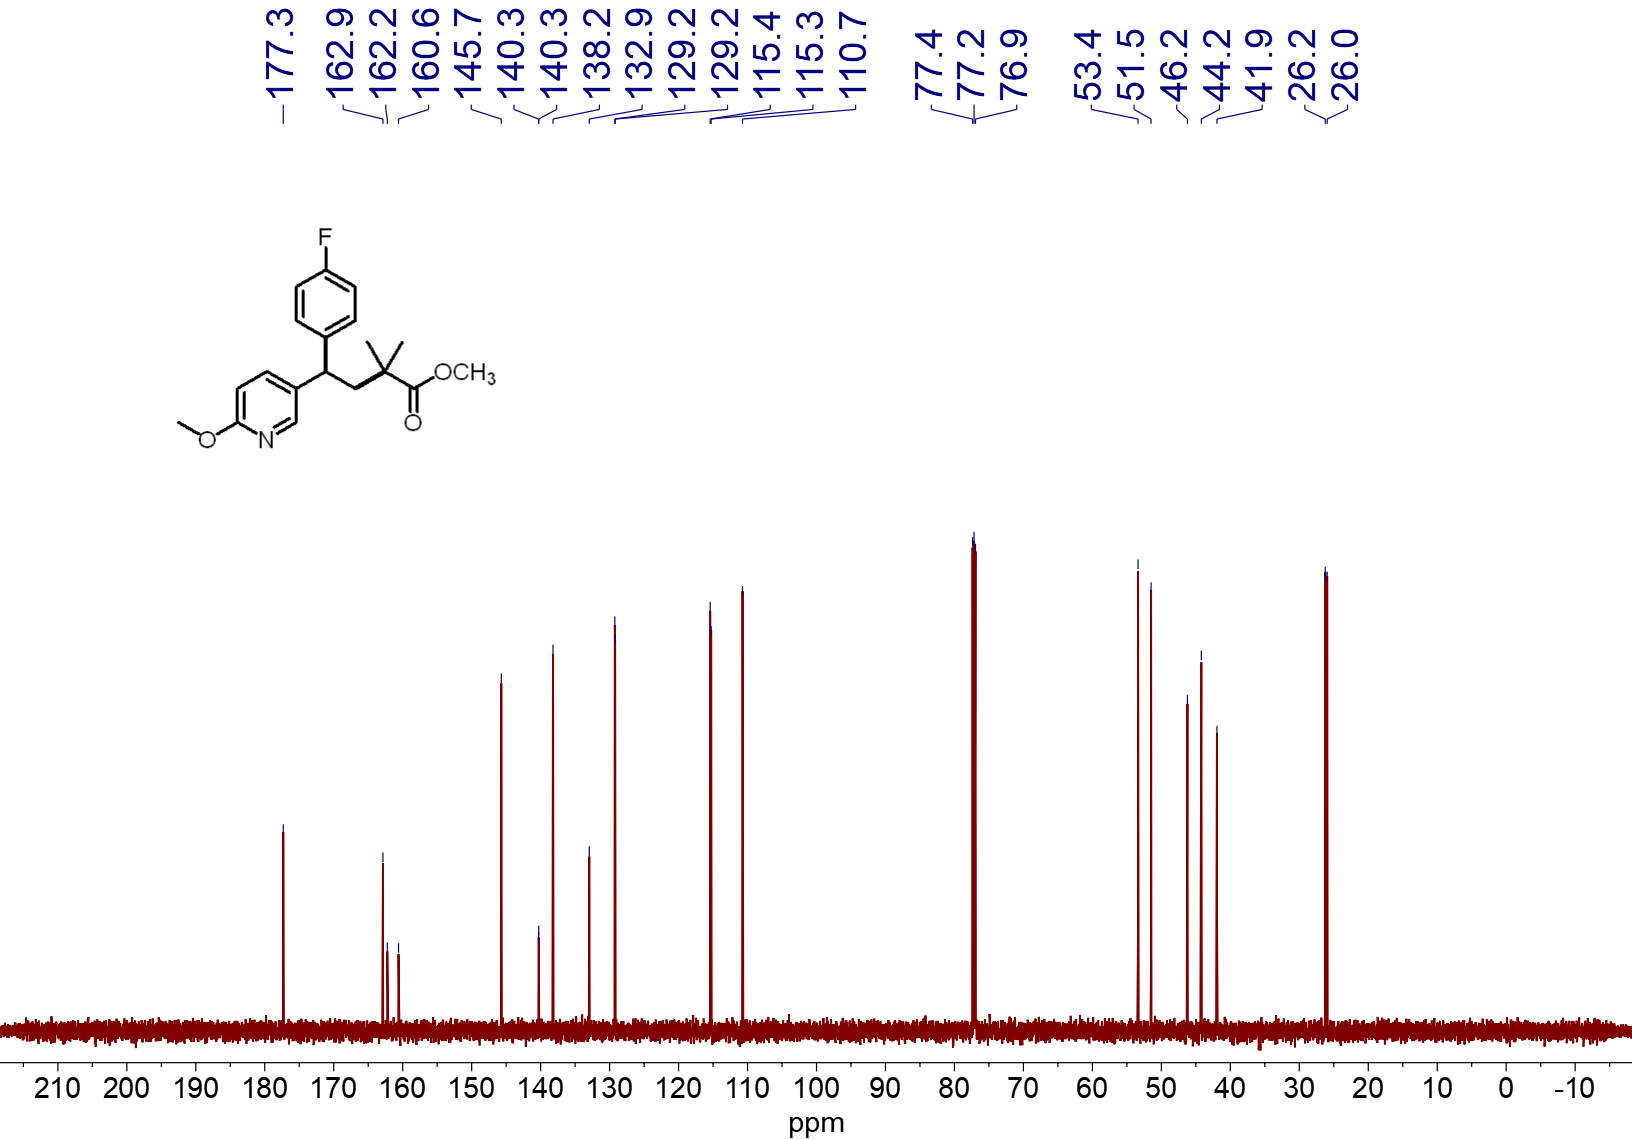


13C NMR spectrum (151 MHz, CDCl3, 23 ºC) of **4j**


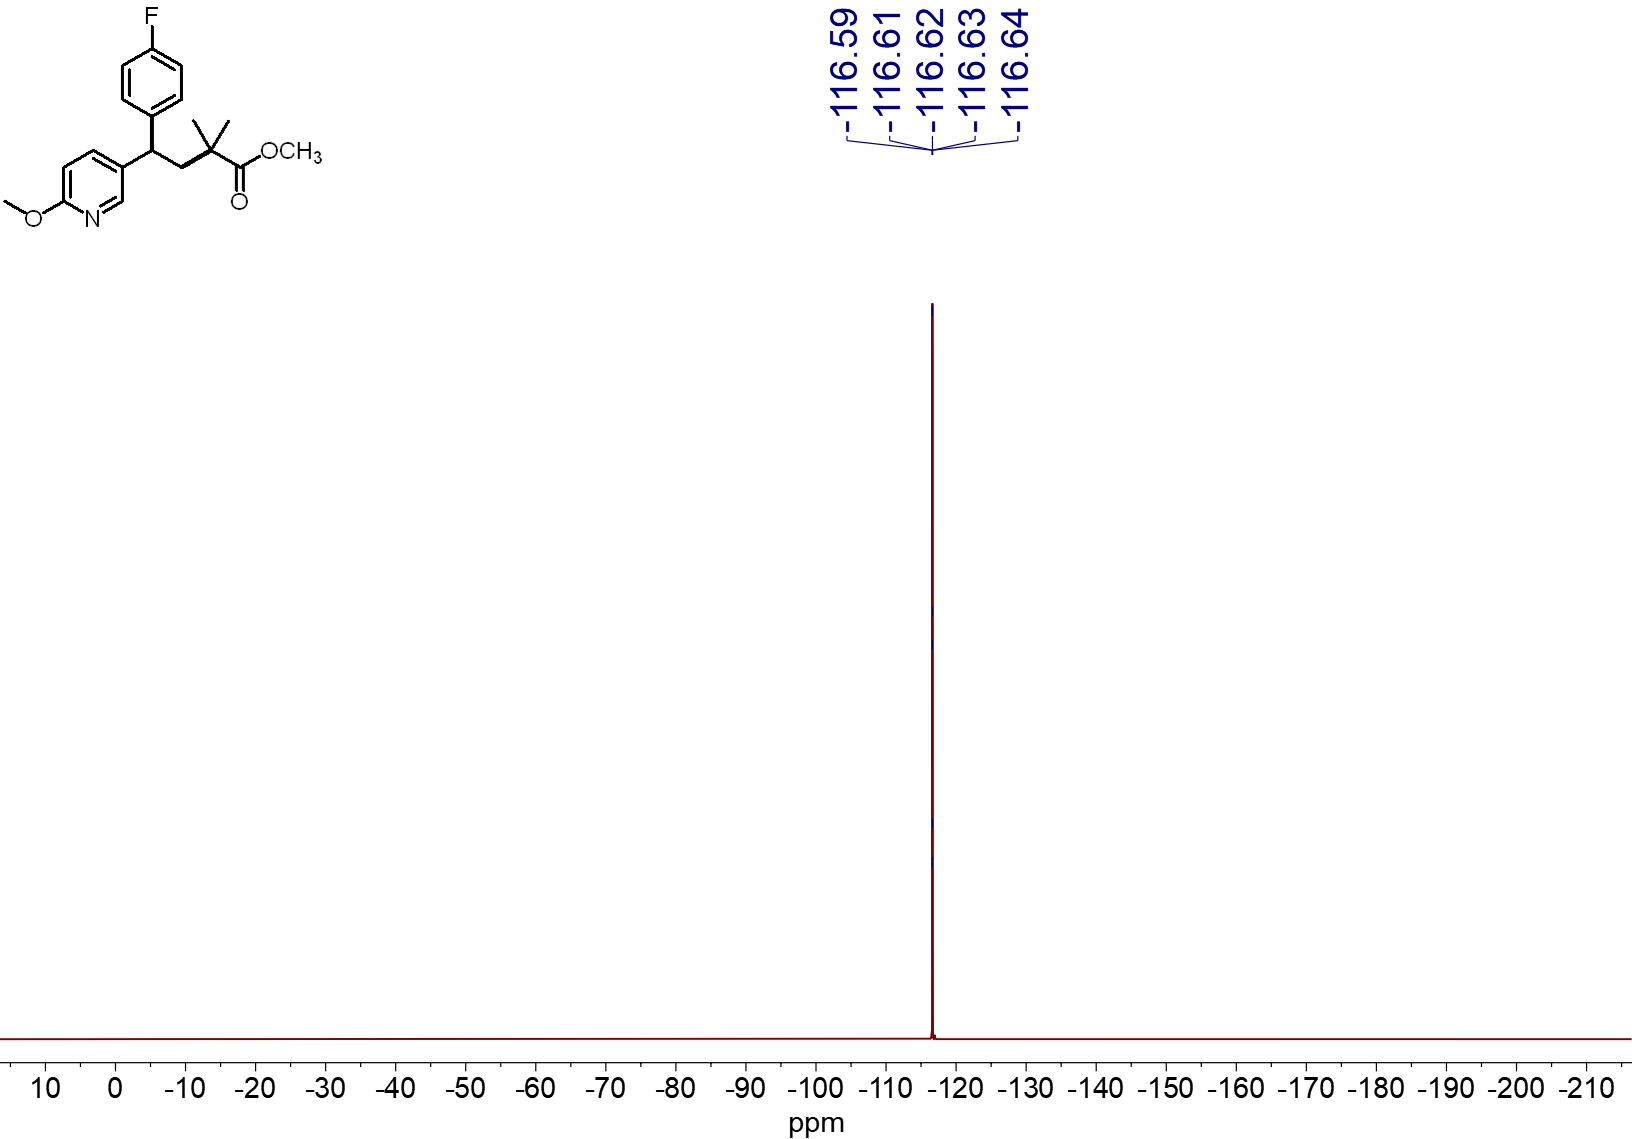


19F NMR spectrum (565 MHz, CDCl3, 23 ºC) of **4j**


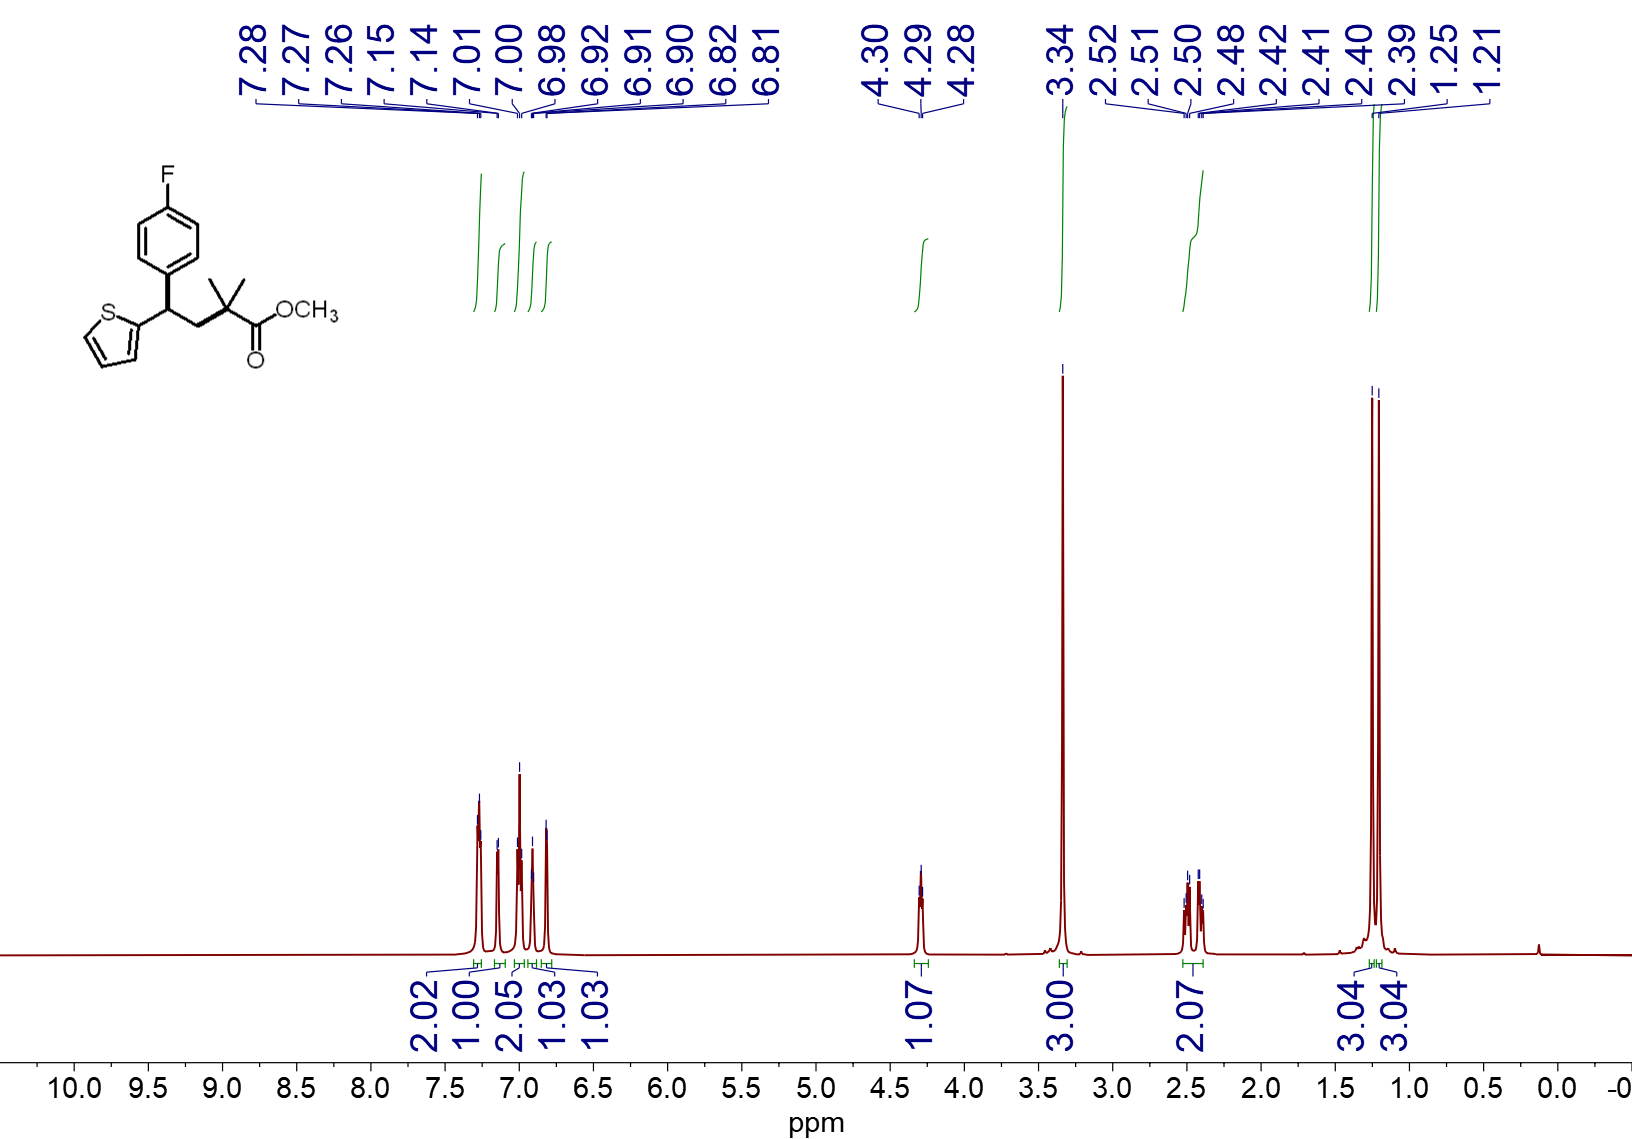


1H NMR spectrum (600 MHz, CDCl3, 23 ºC) of **4k**


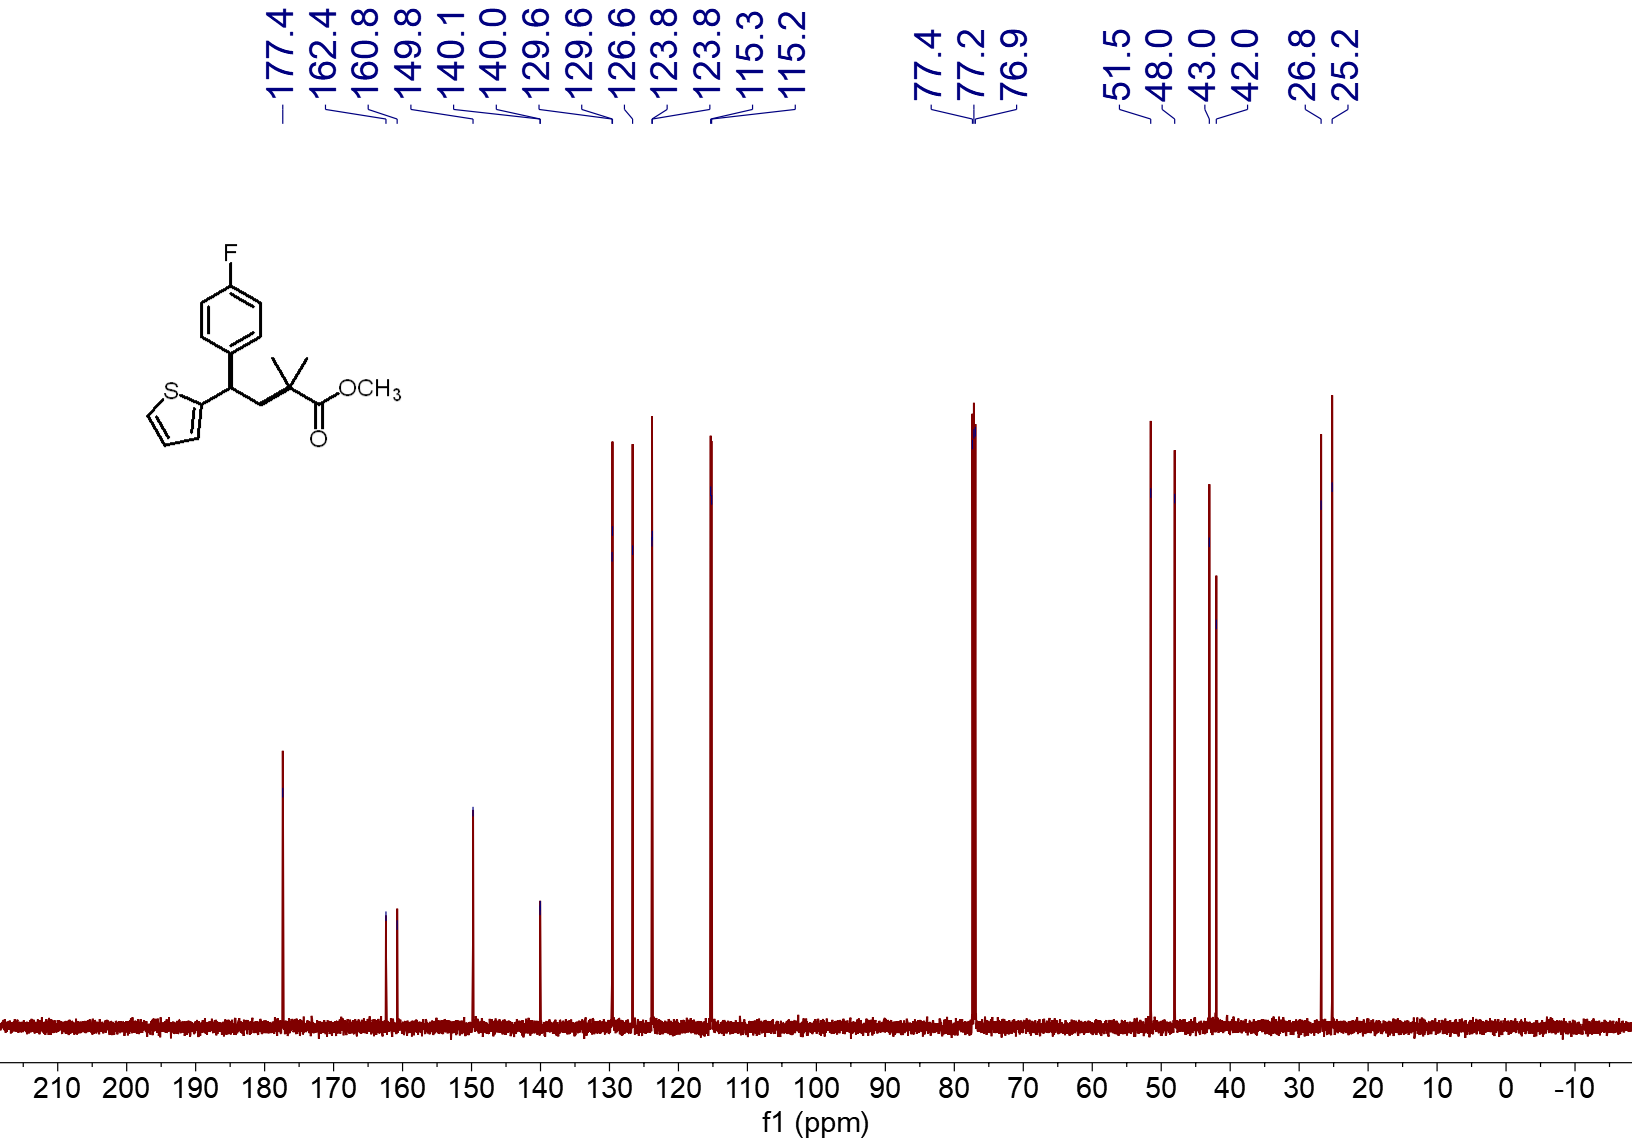


13C NMR spectrum (151 MHz, CDCl3, 23 ºC) of **4k**


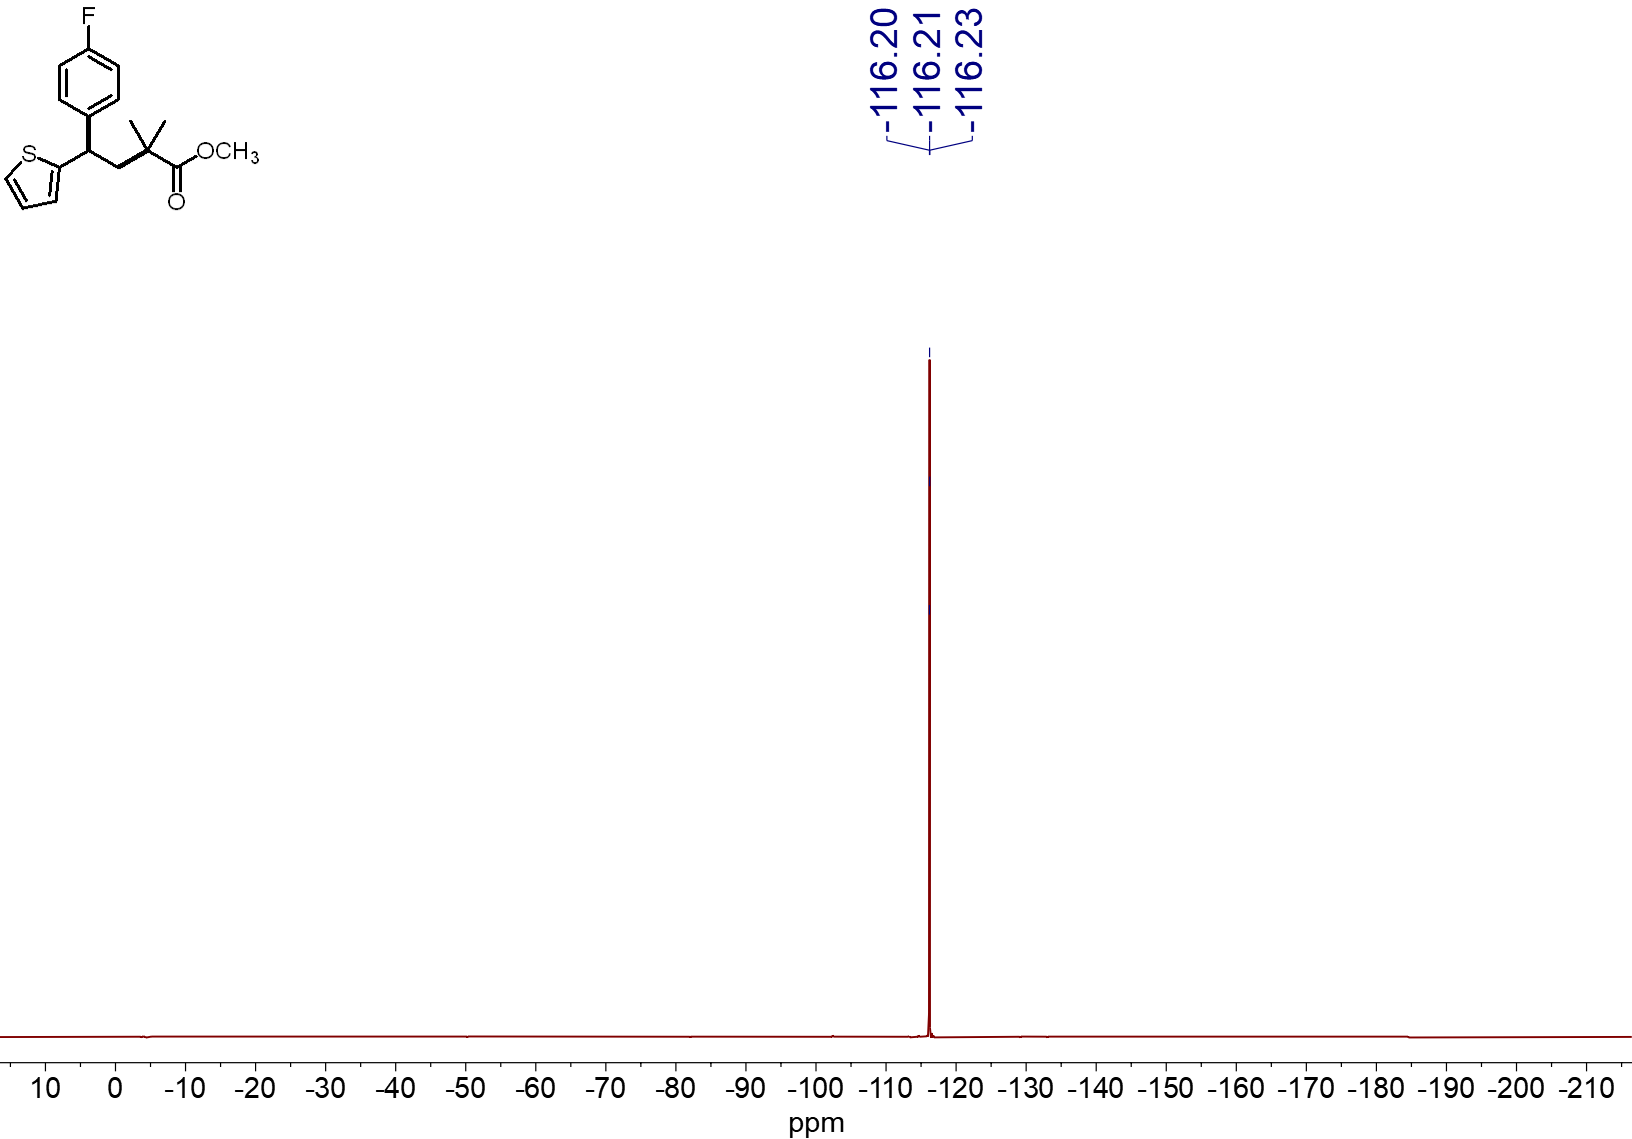


19F NMR spectrum (565 MHz, CDCl3, 23 ºC) of **4k**


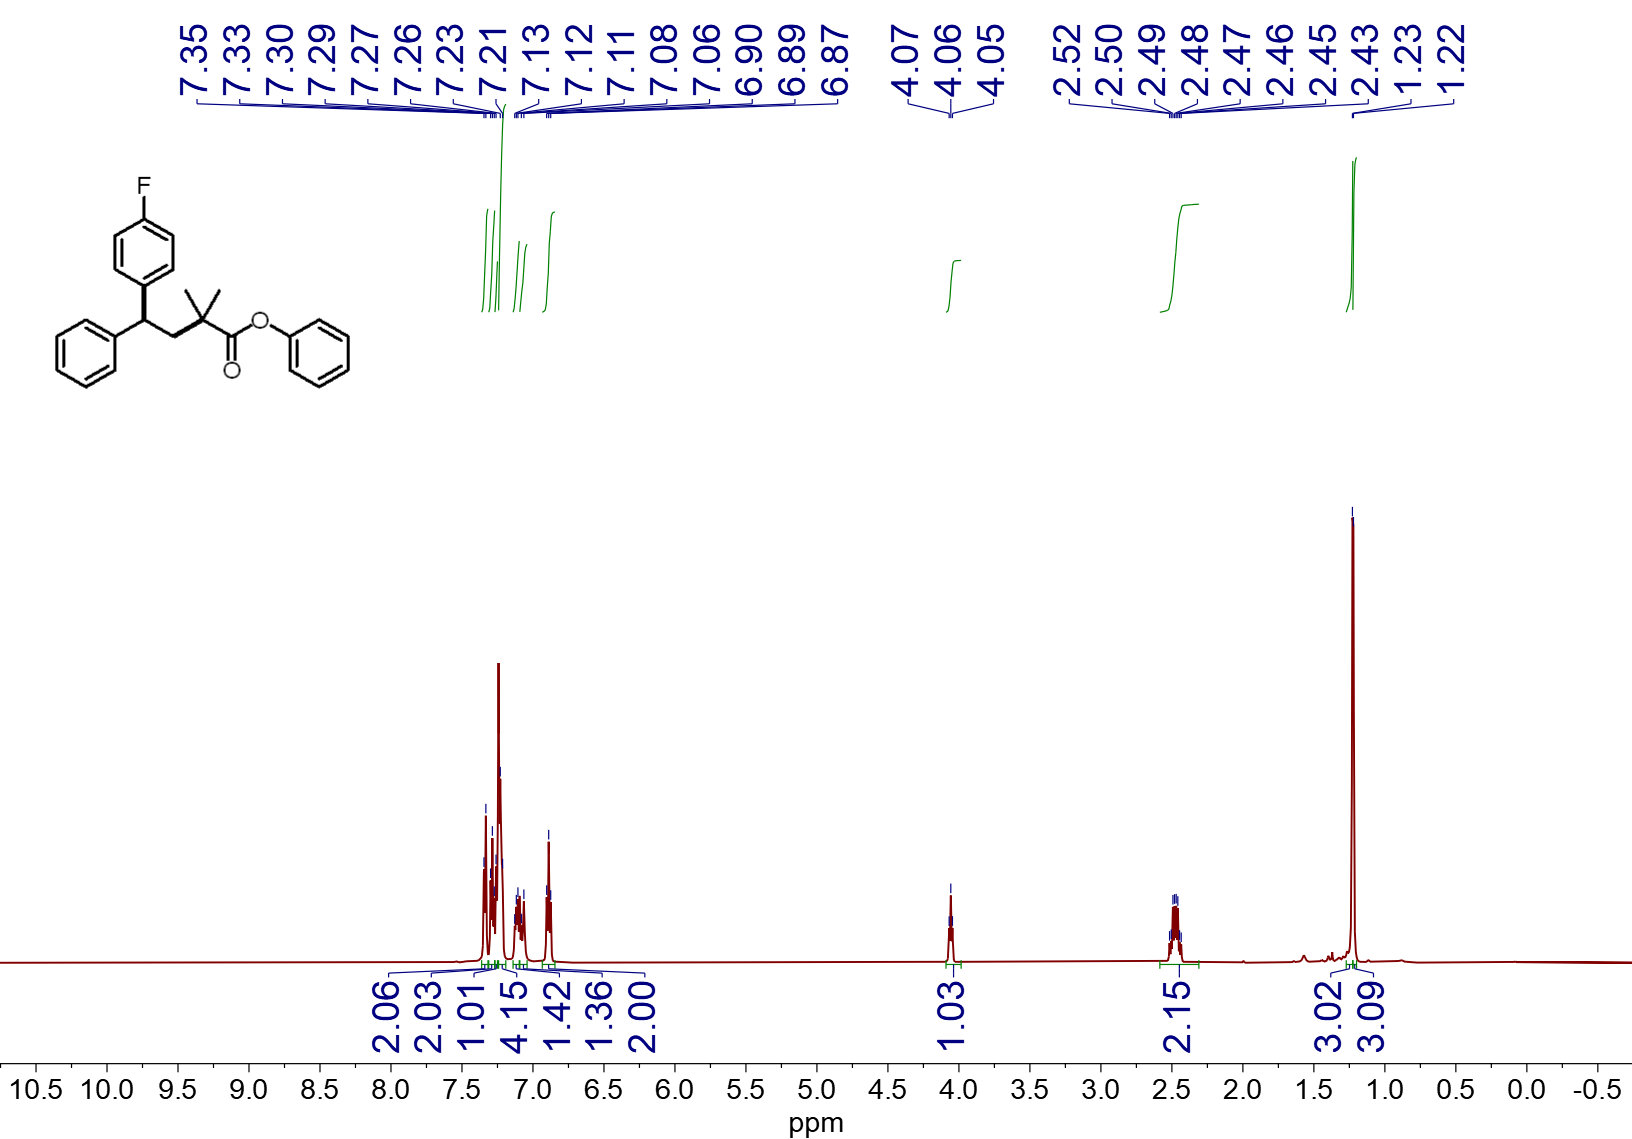


1H NMR spectrum (600 MHz, CDCl3, 23 ºC) of **4l**


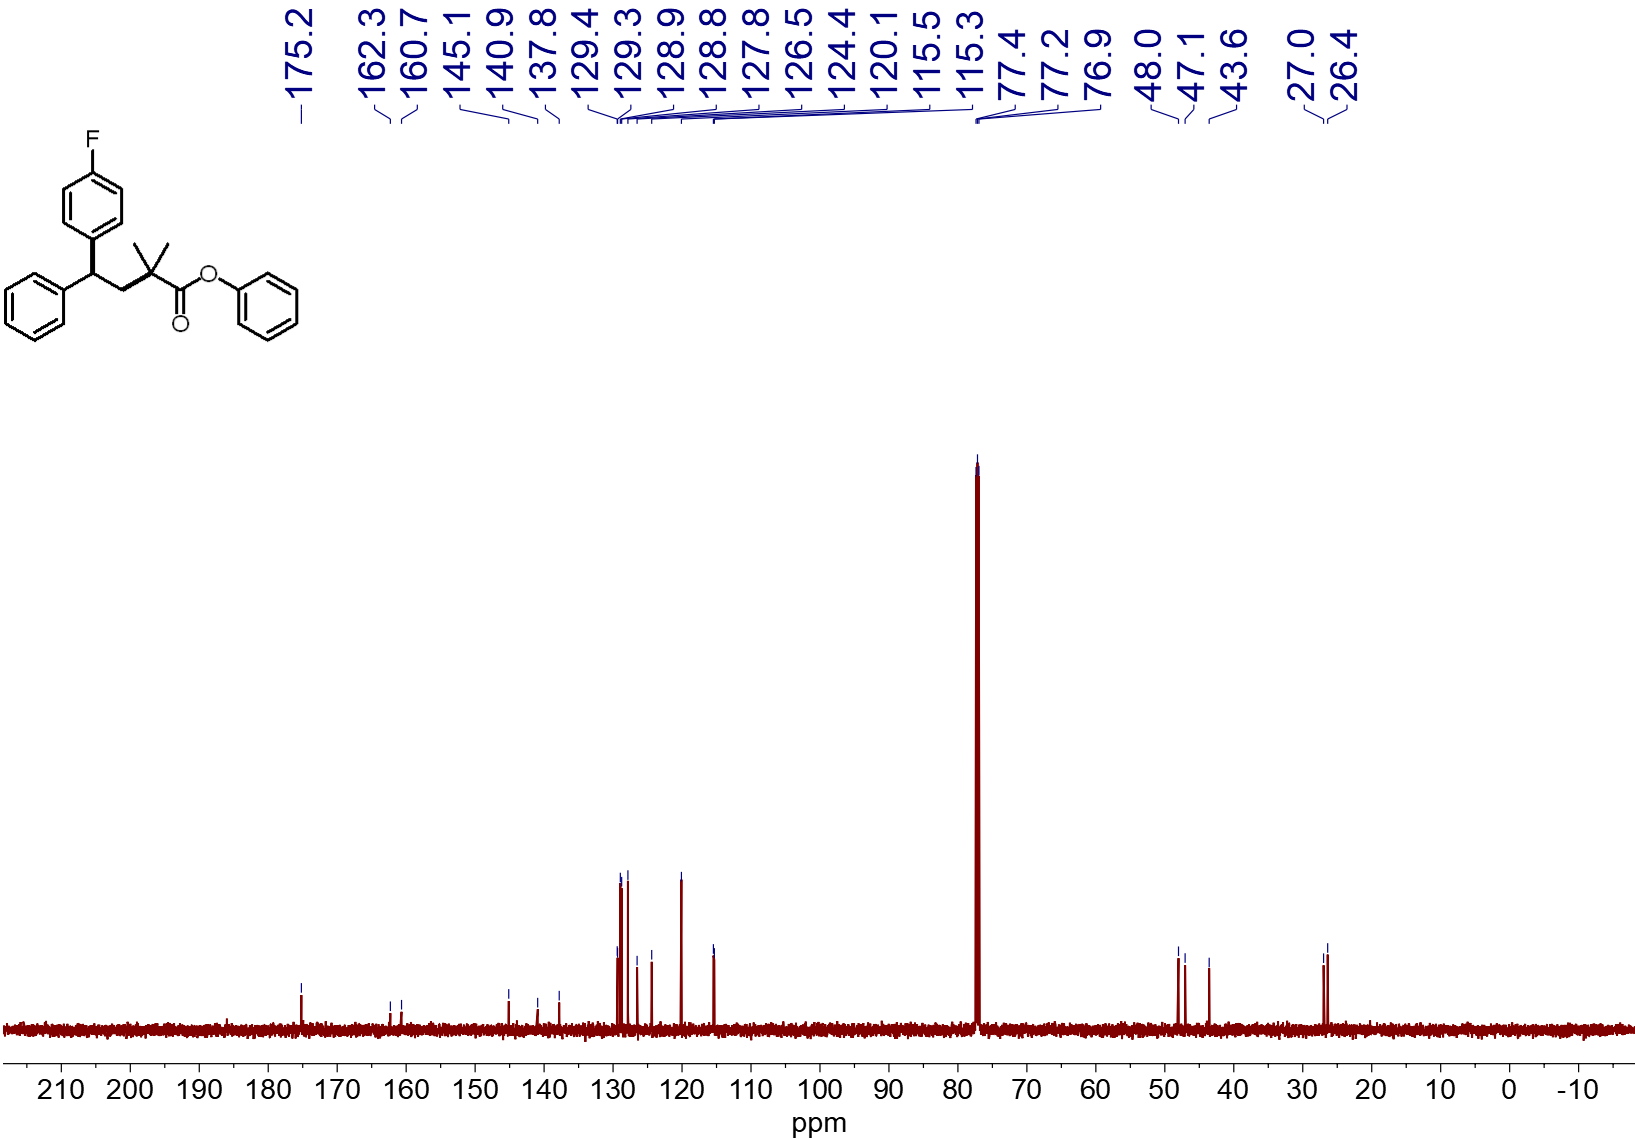


13C NMR spectrum (151 MHz, CDCl3, 23 ºC) of **4l**


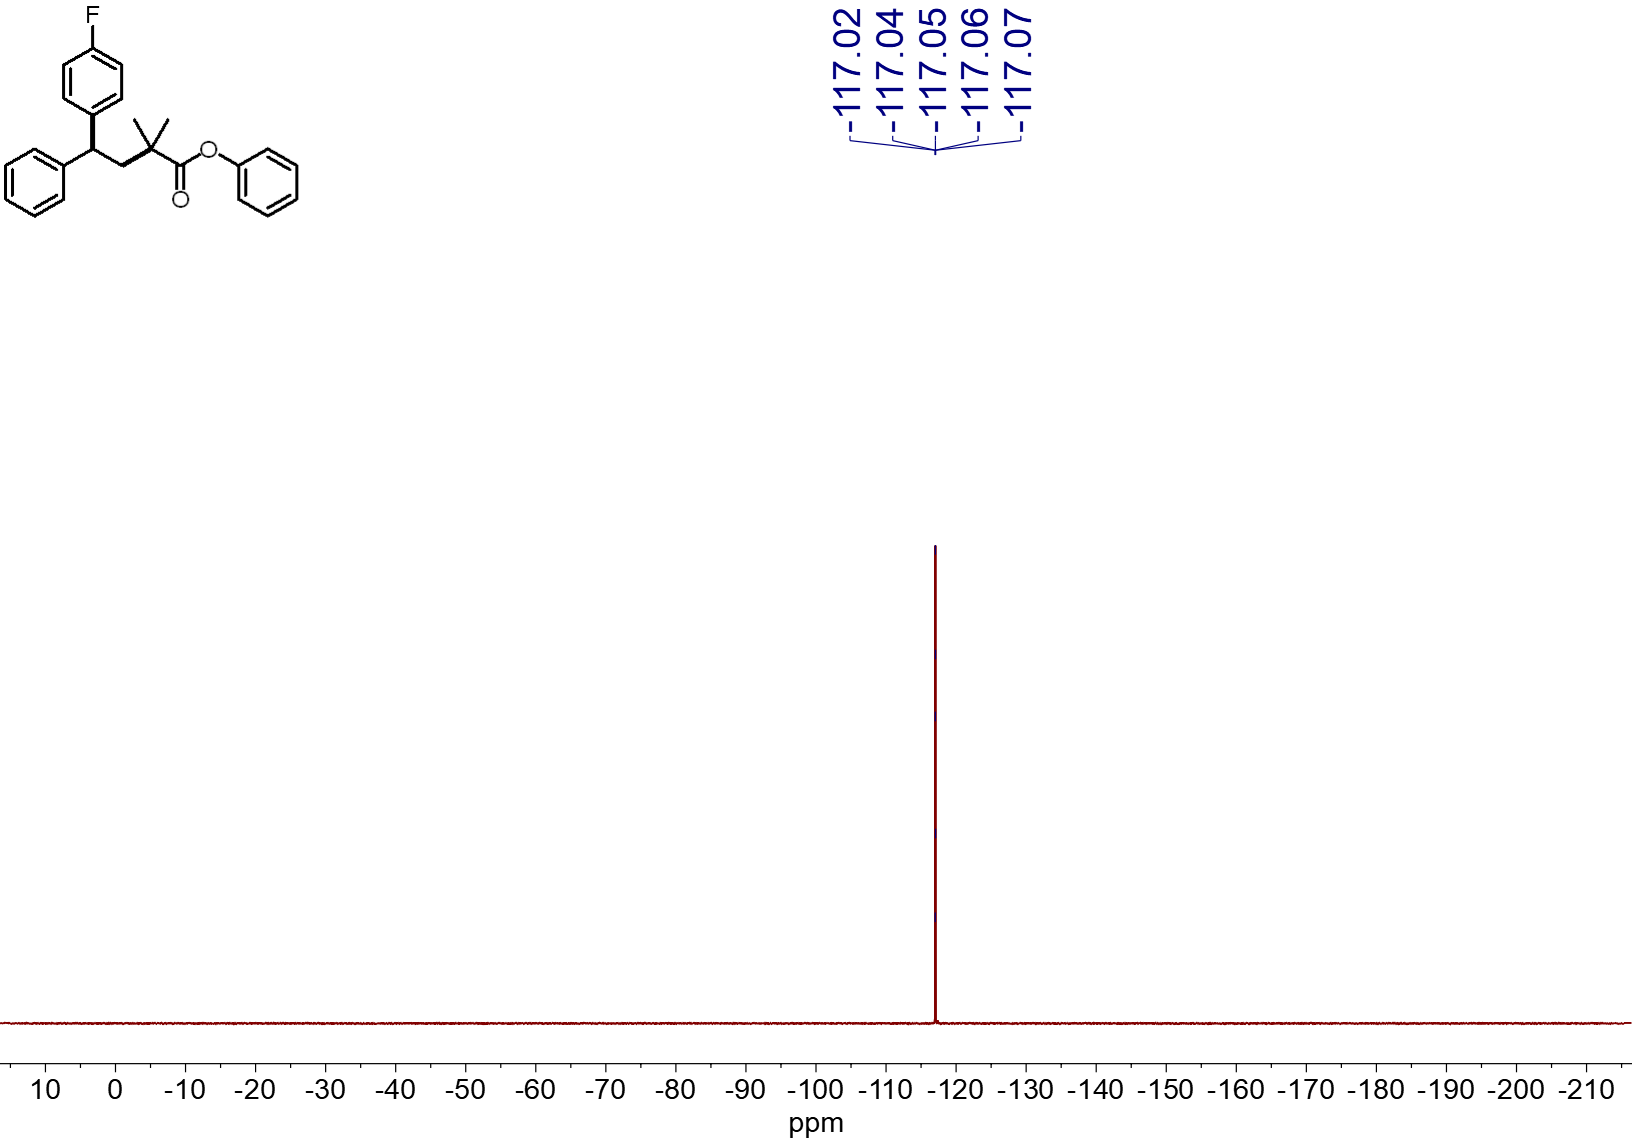


19F NMR spectrum (565 MHz, CDCl3, 23 ºC) of **4l**


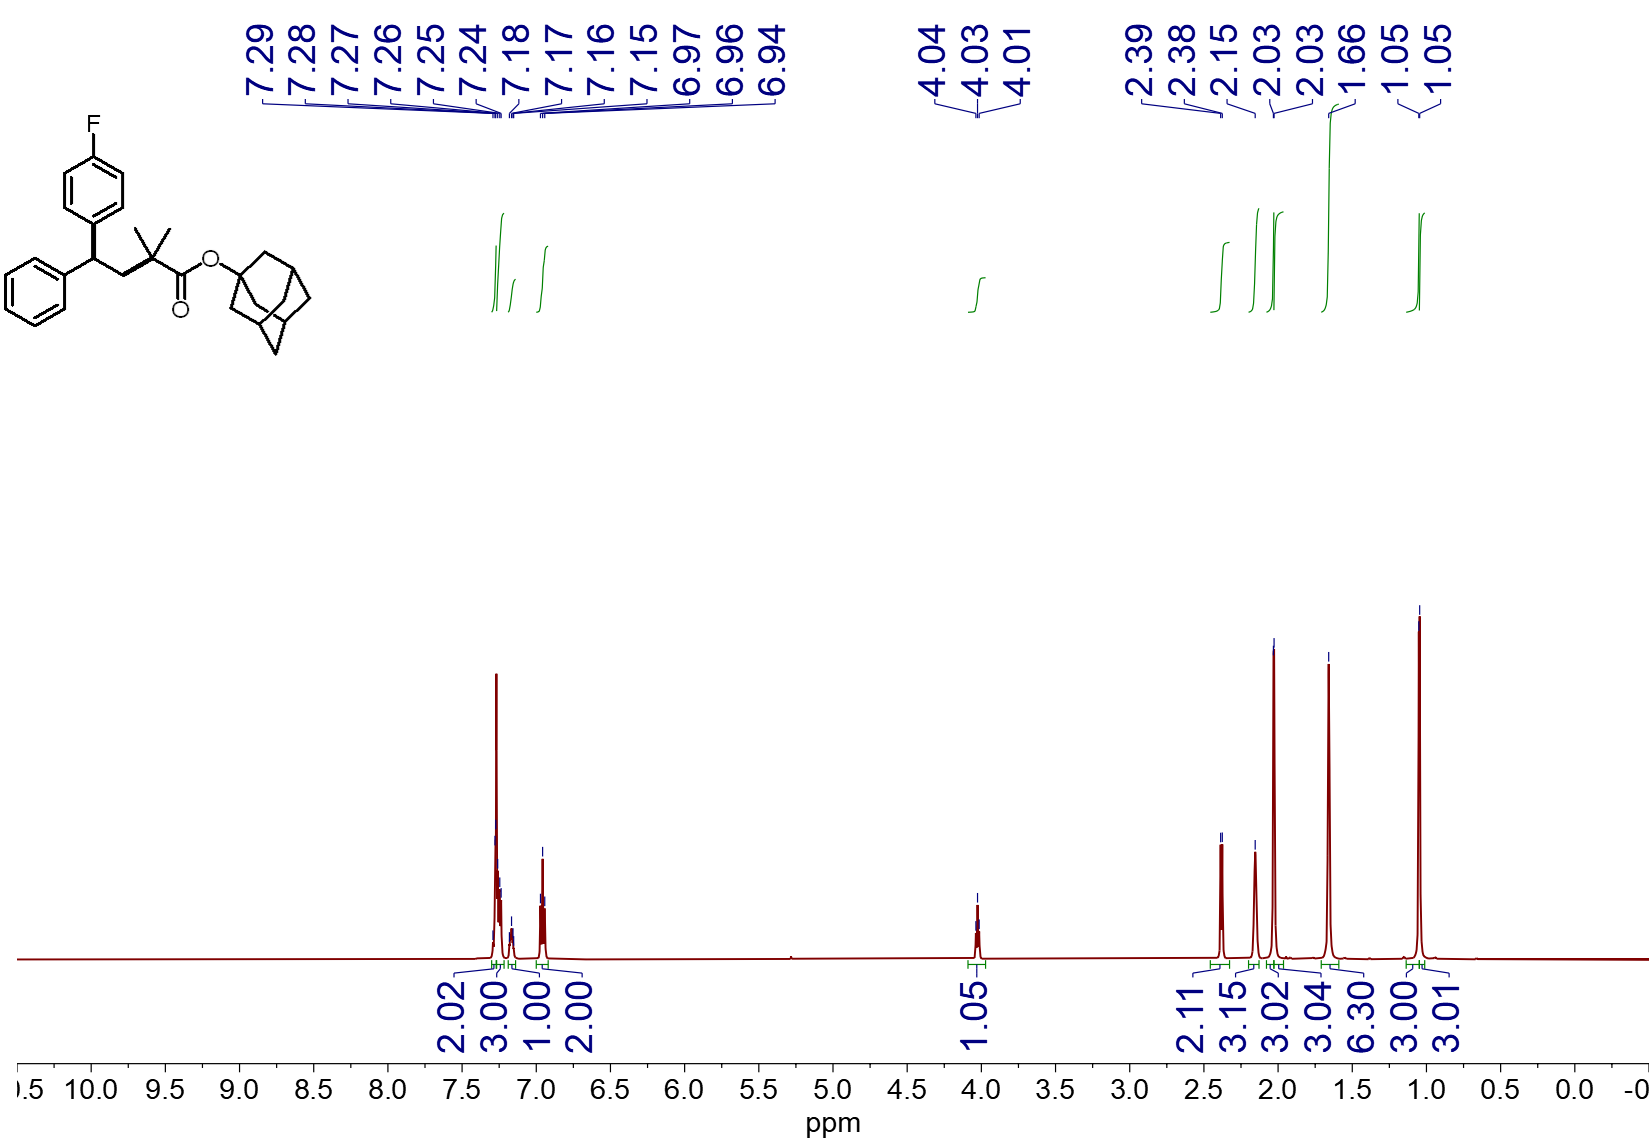


1H NMR spectrum (600 MHz, CDCl3, 23 ºC) of **4m**


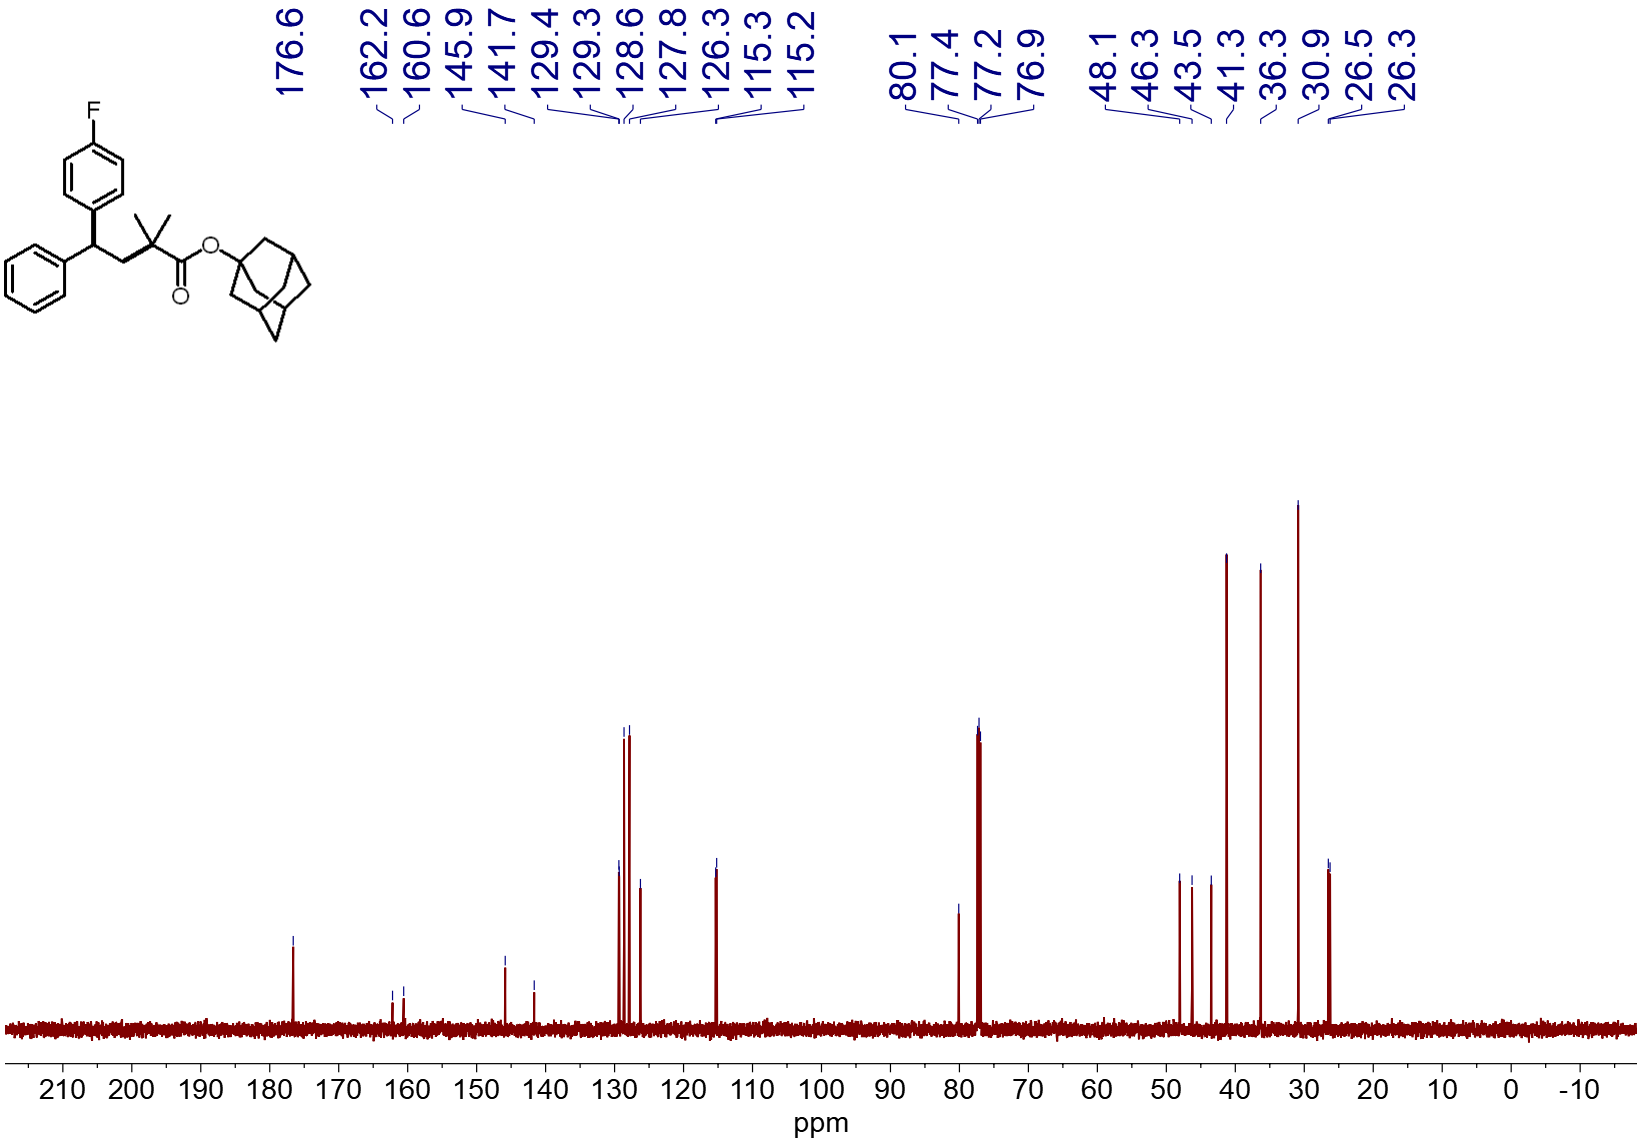


13C NMR spectrum (151 MHz, CDCl3, 23 ºC) of **4m**


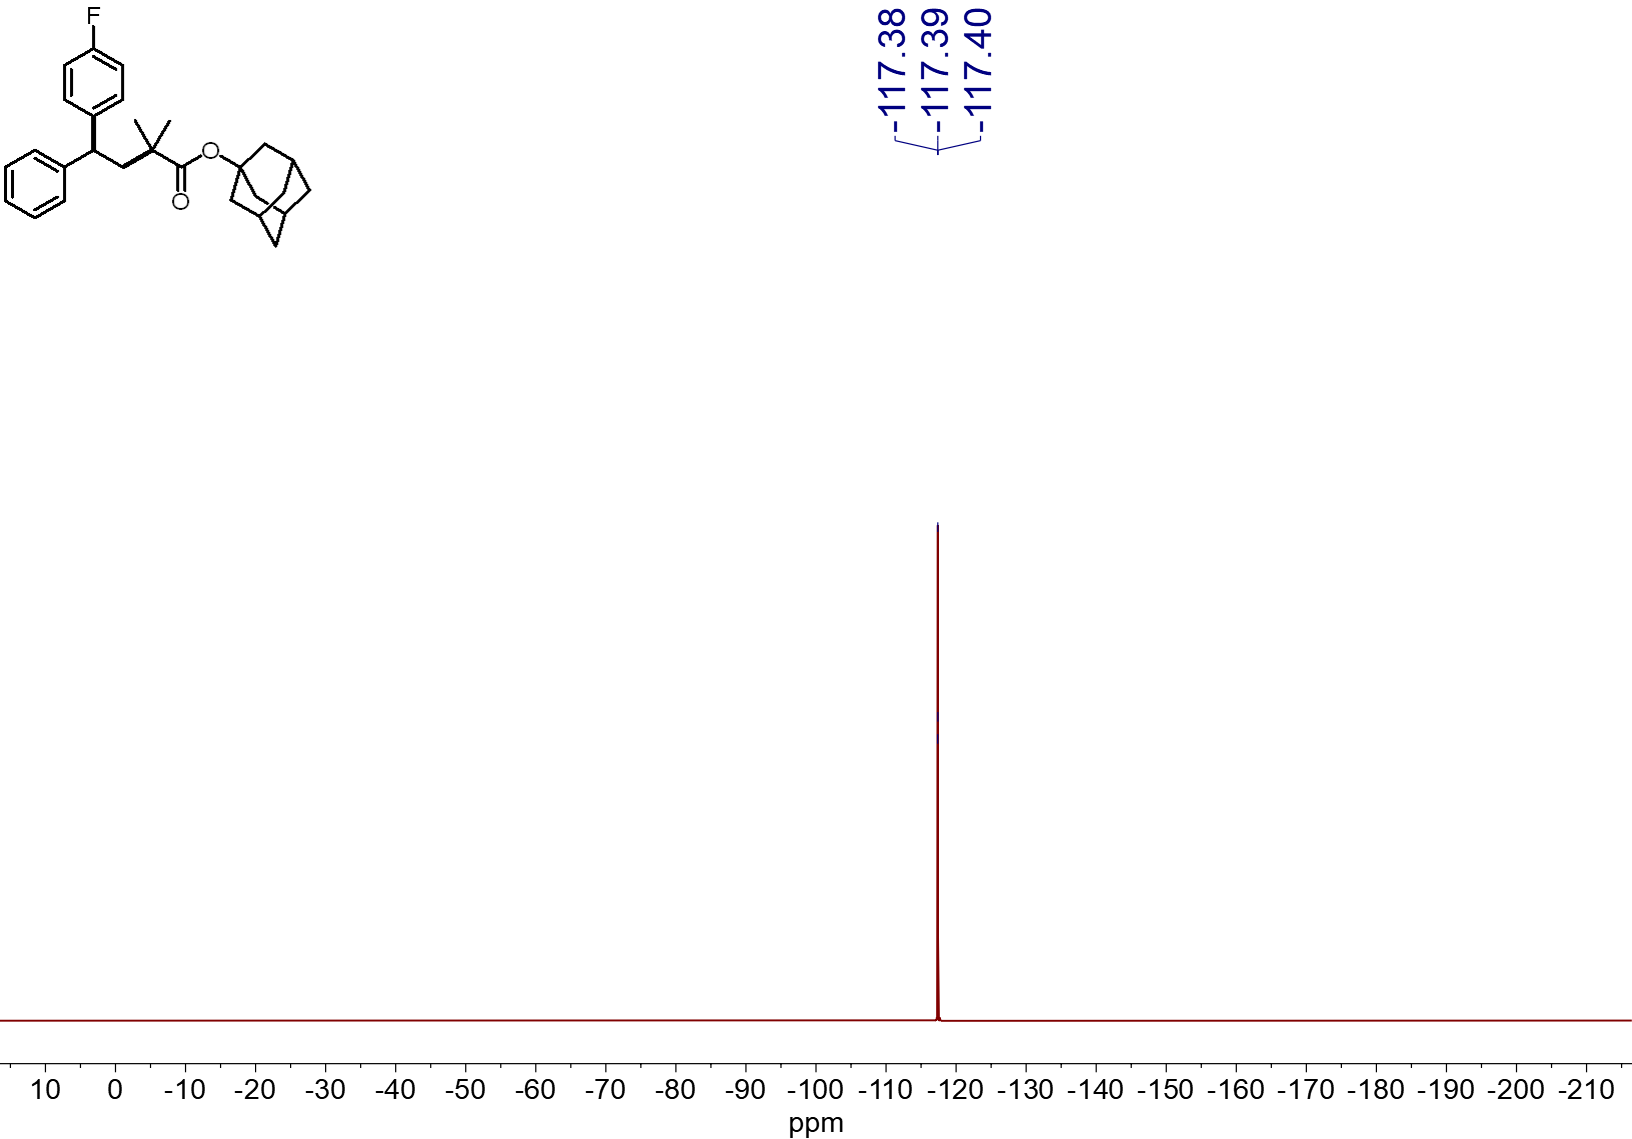


19F NMR spectrum (565 MHz, CDCl3, 23 ºC) of **4m**


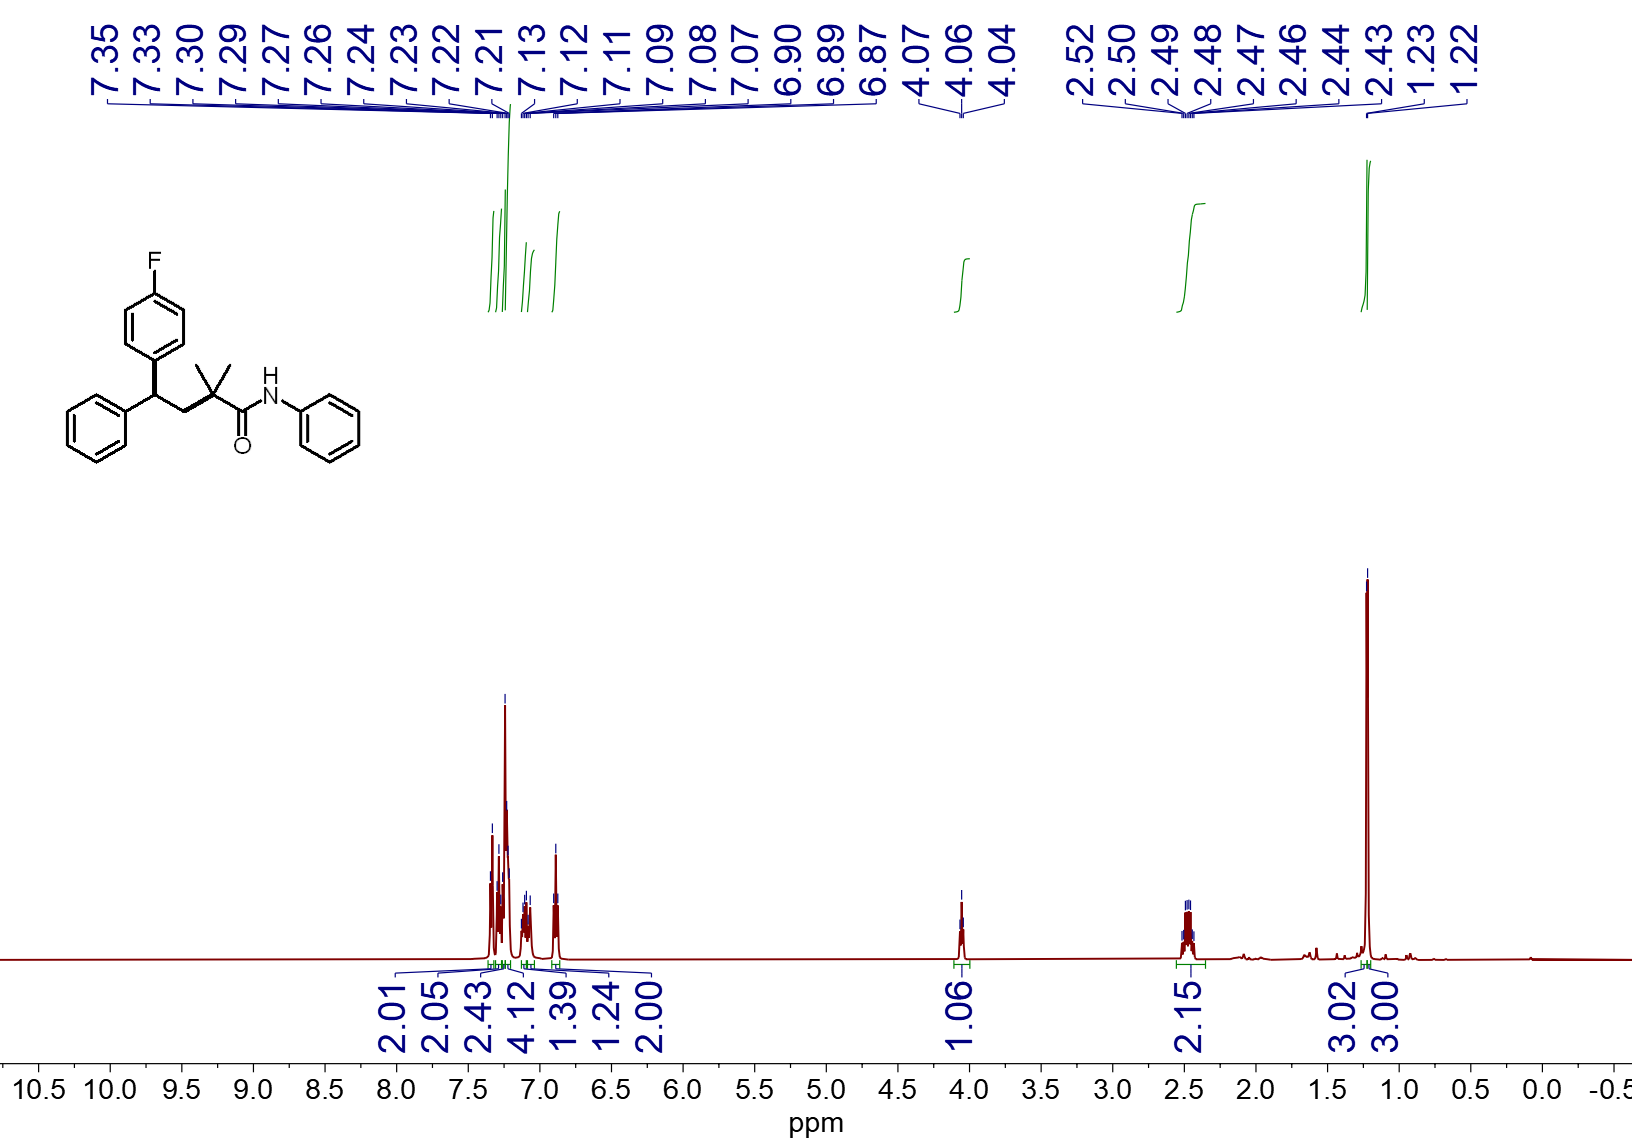


1H NMR spectrum (600 MHz, CDCl3, 23 ºC) of **4n**


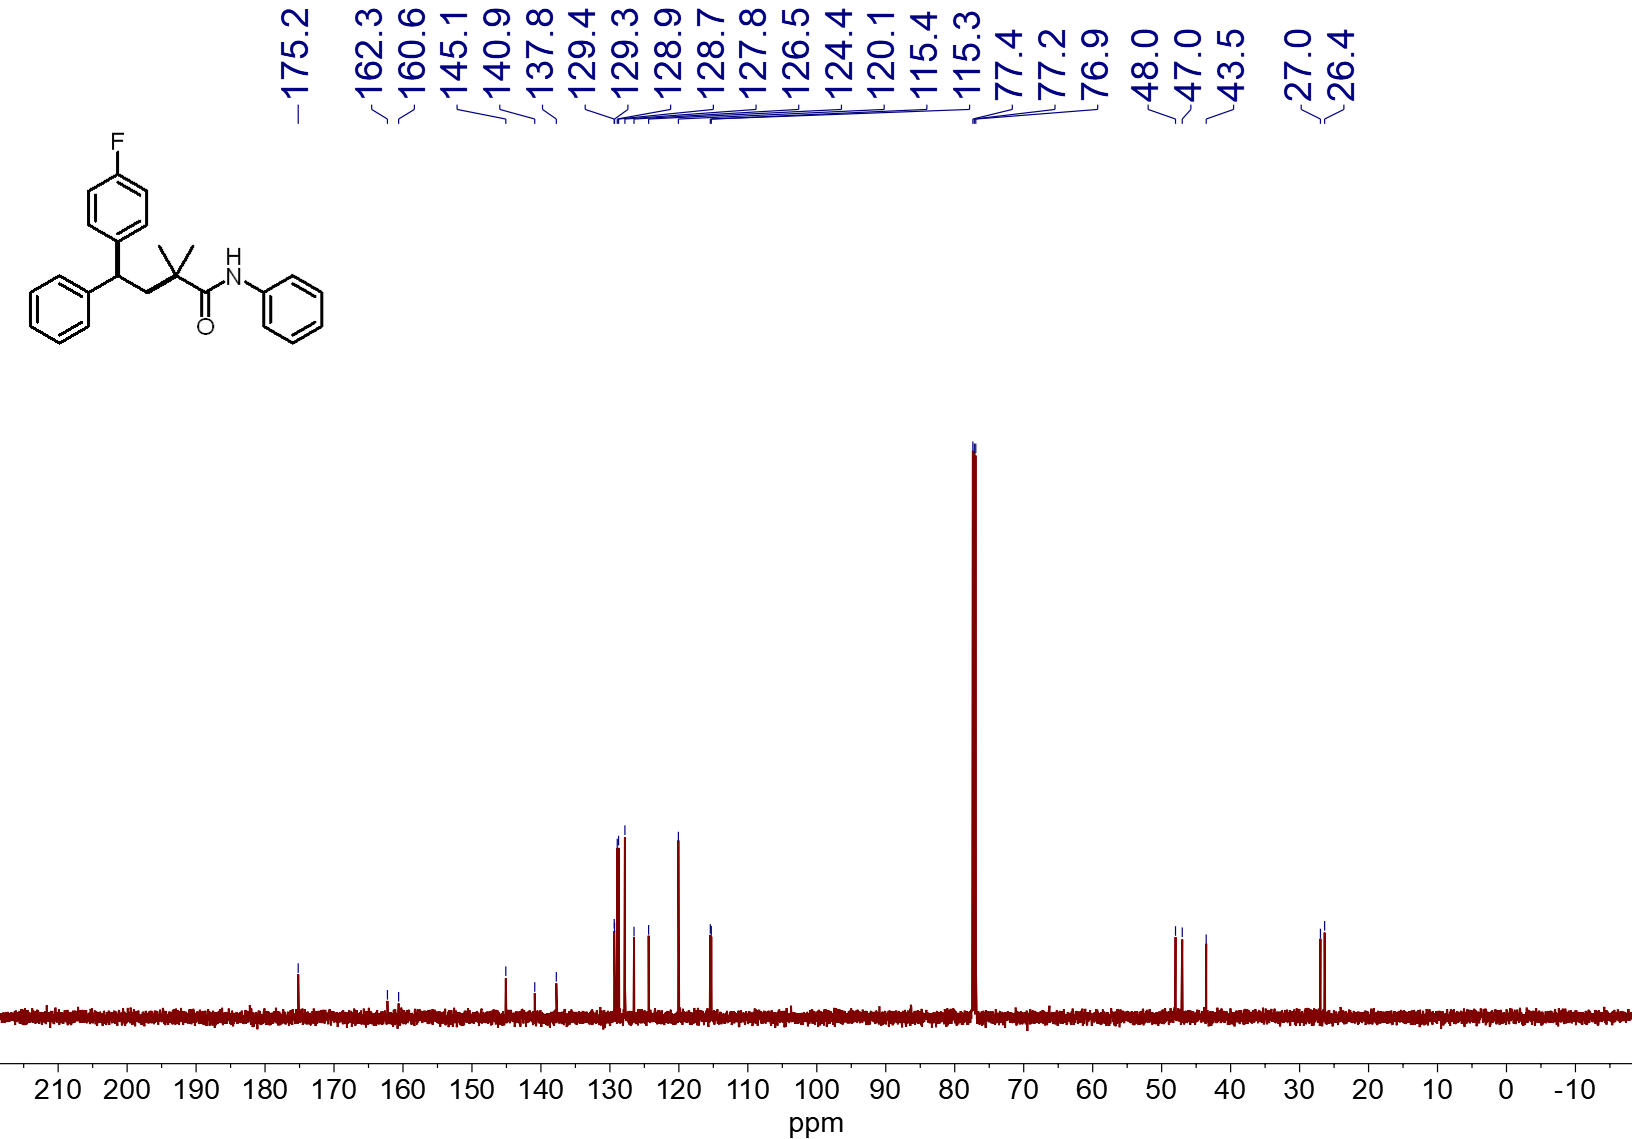


13C NMR spectrum (151 MHz, CDCl3, 23 ºC) of **4n**


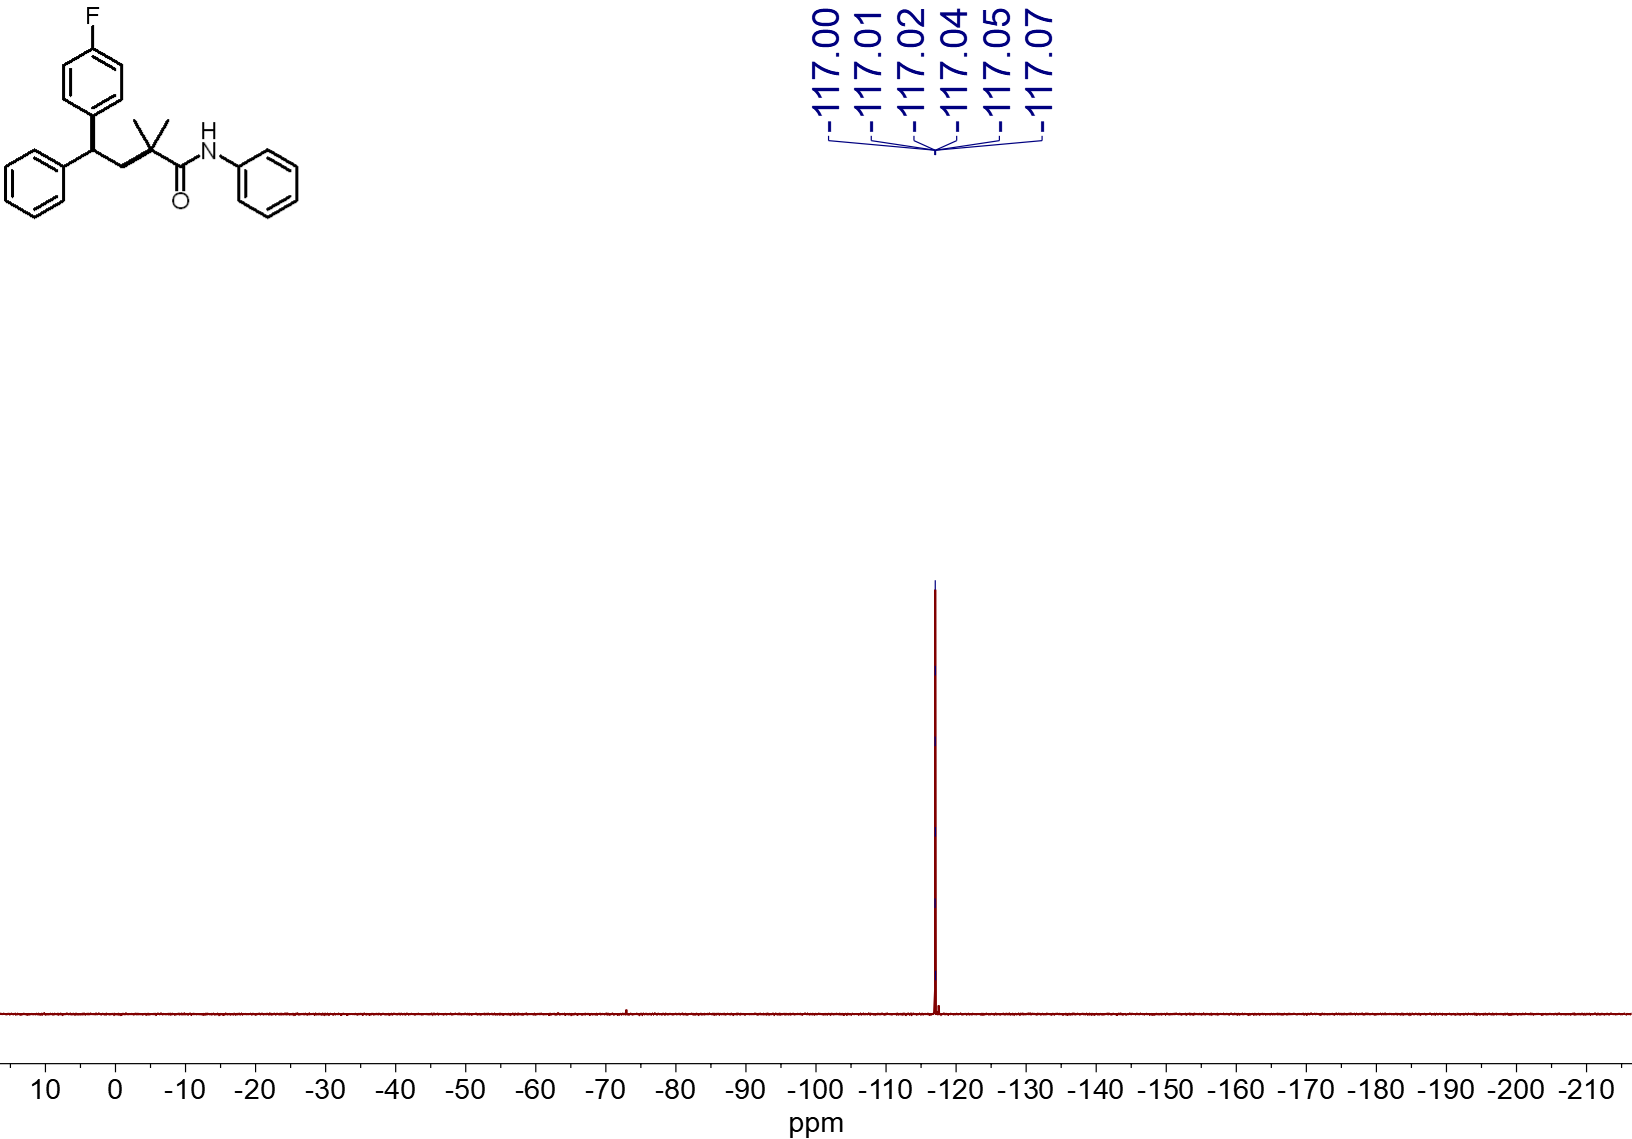


19F NMR spectrum (565 MHz, CDCl3, 23 ºC) of **4n**


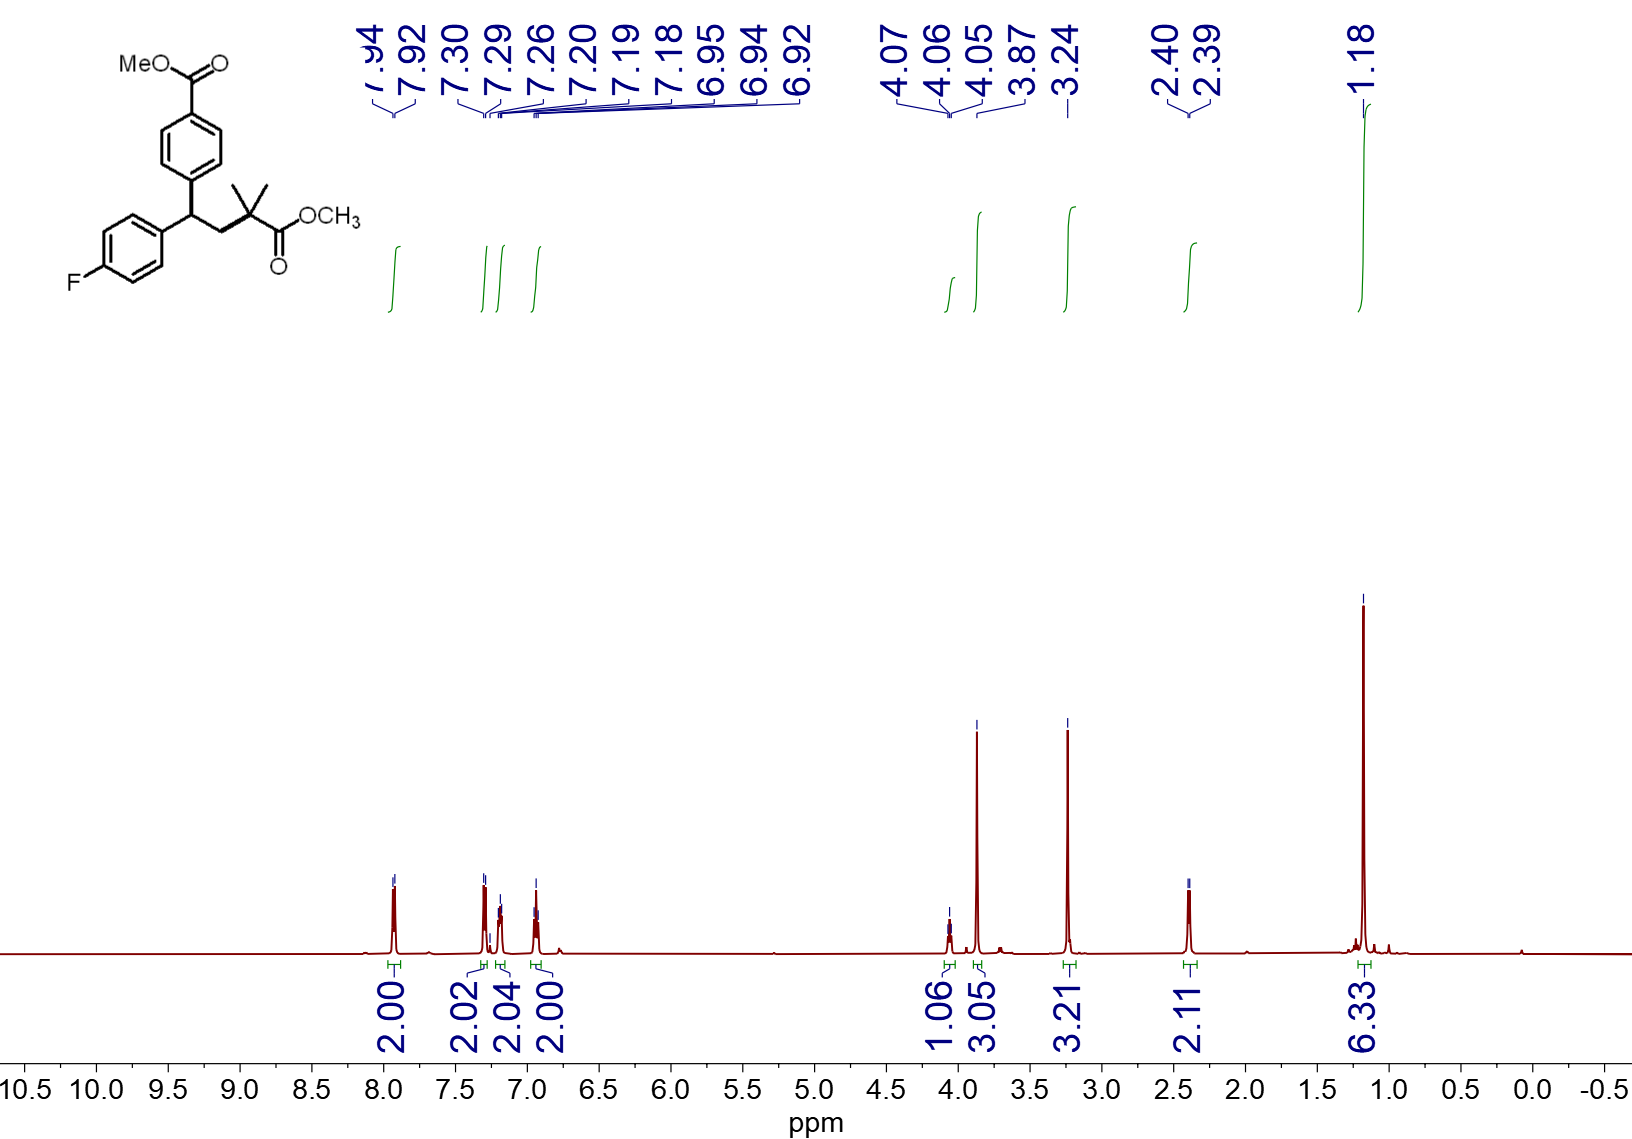


1H NMR spectrum (600 MHz, CDCl3, 23 ºC) of **4o**


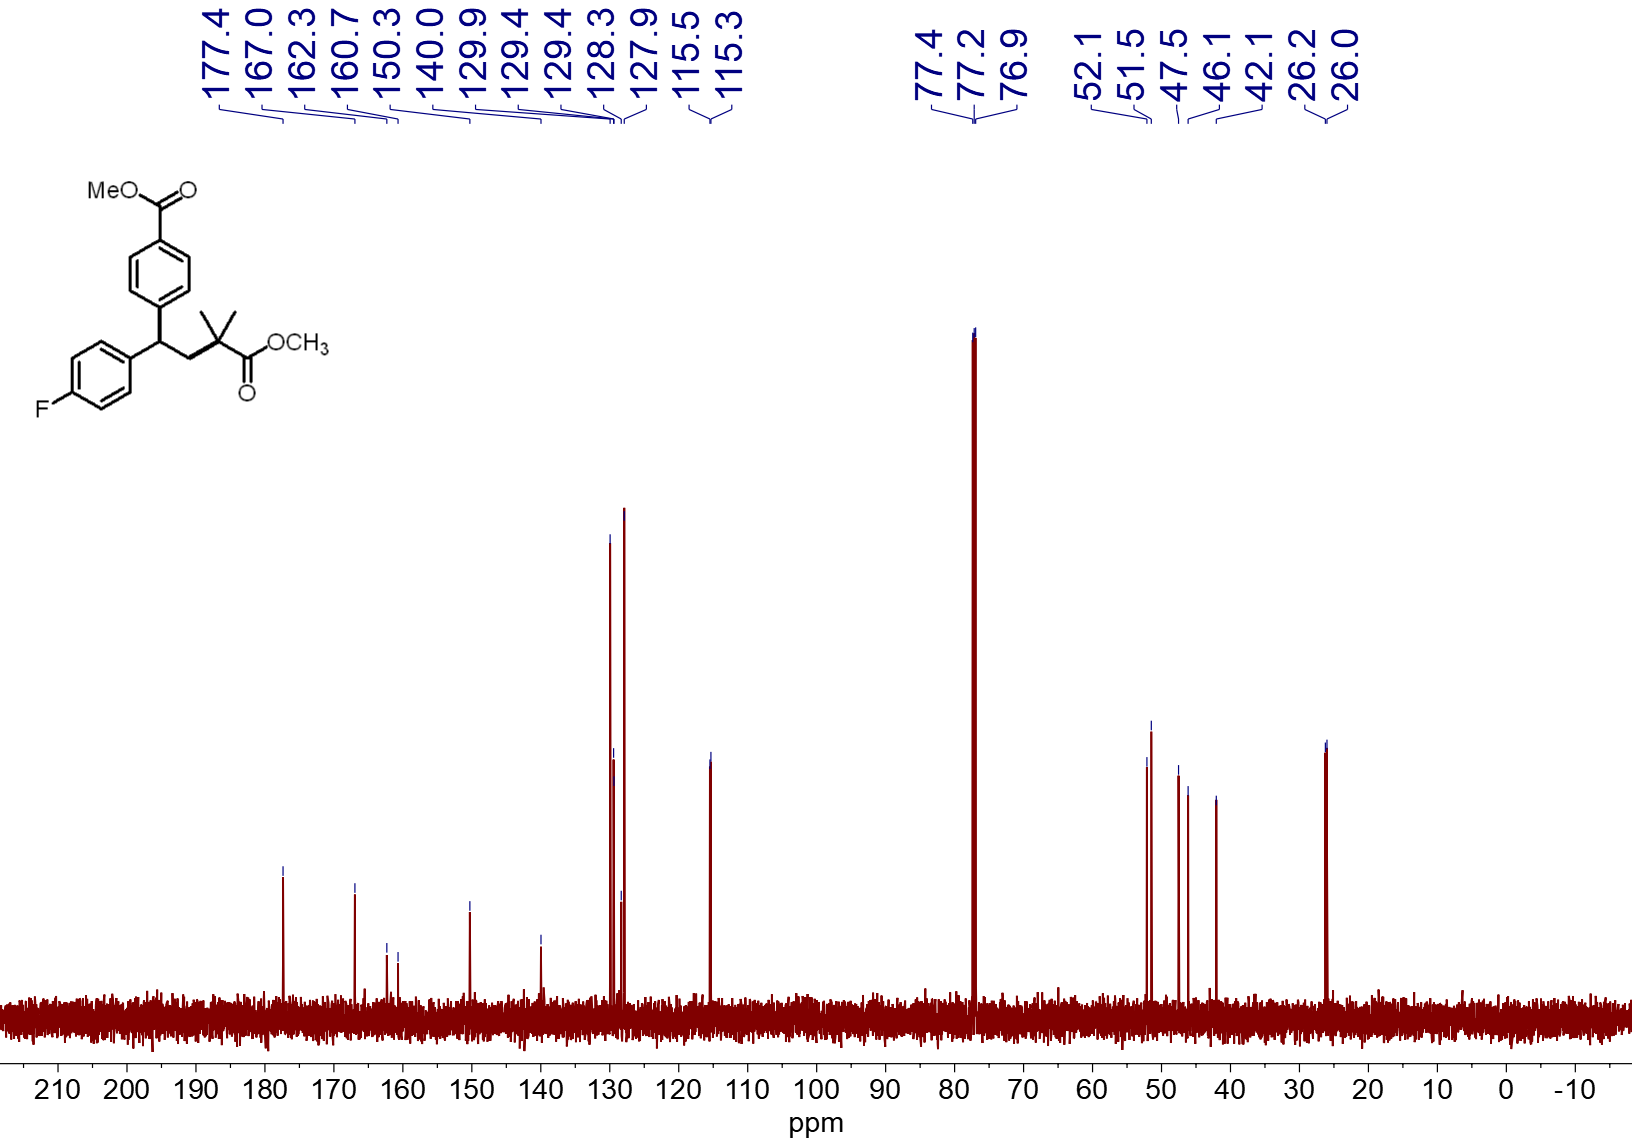


13C NMR spectrum (151 MHz, CDCl3, 23 ºC) of **4o**


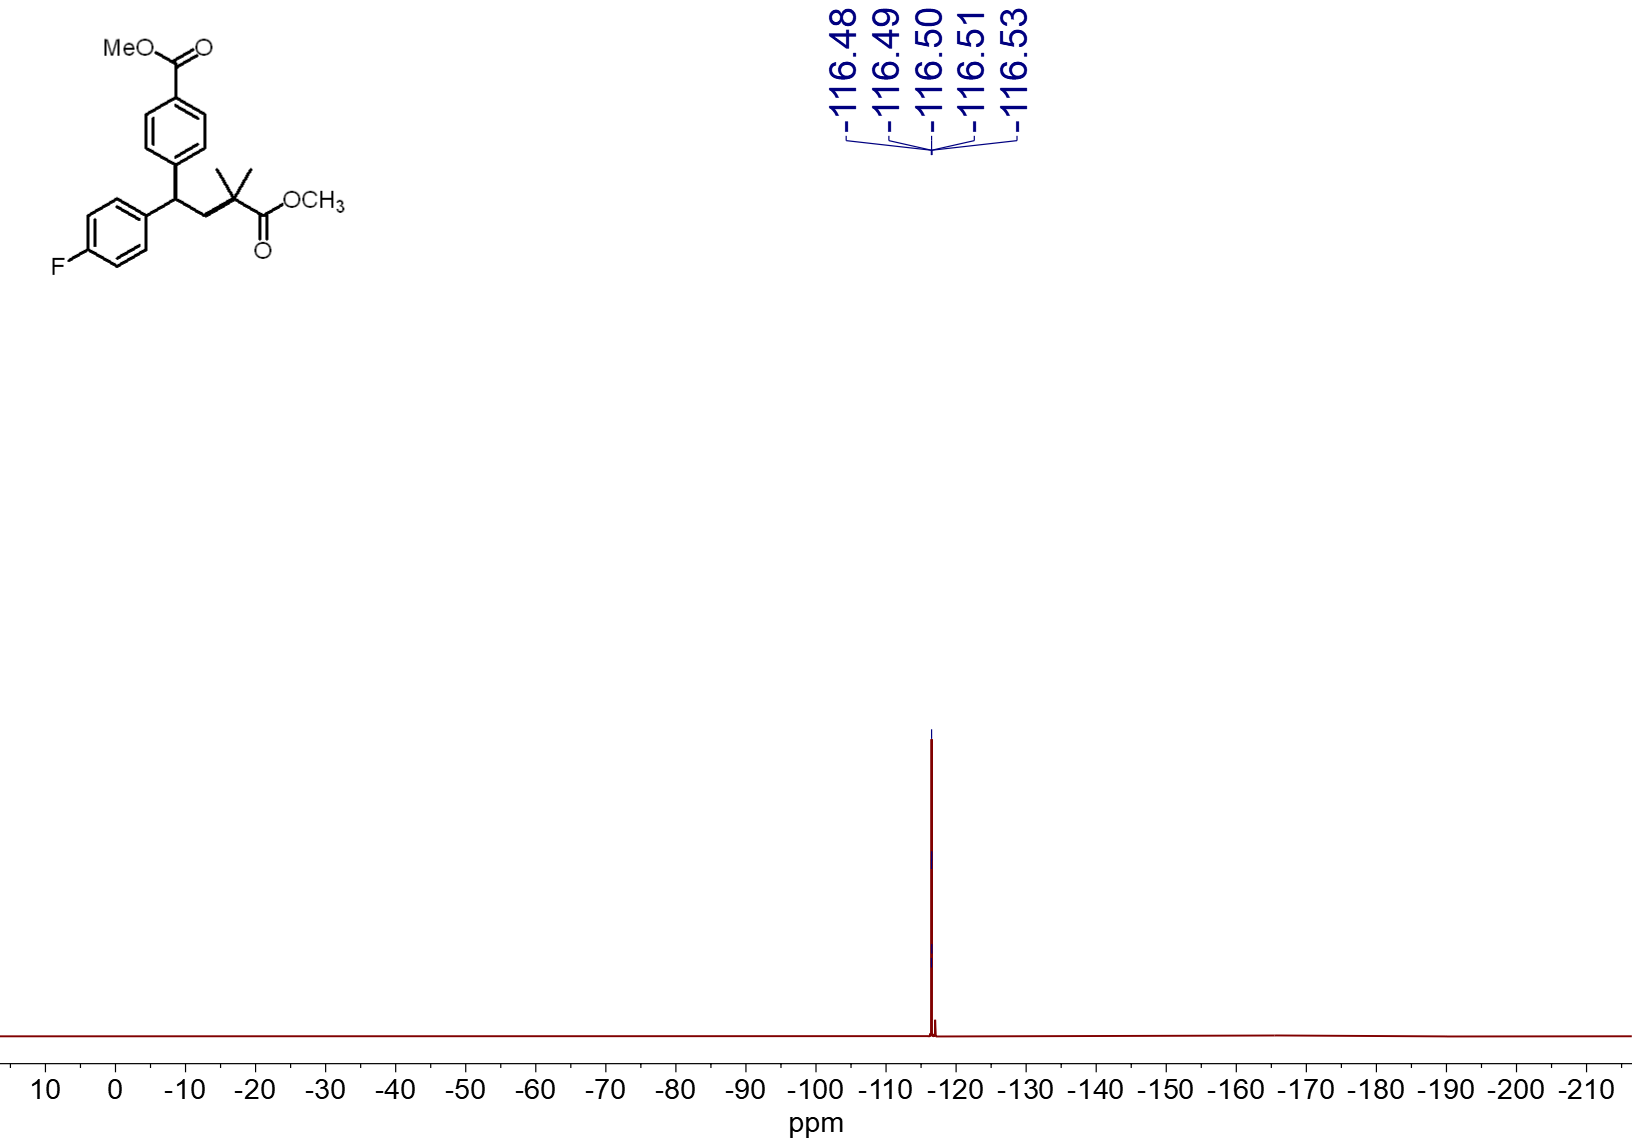


19F NMR spectrum (565 MHz, CDCl3, 23 ºC) of **4o**


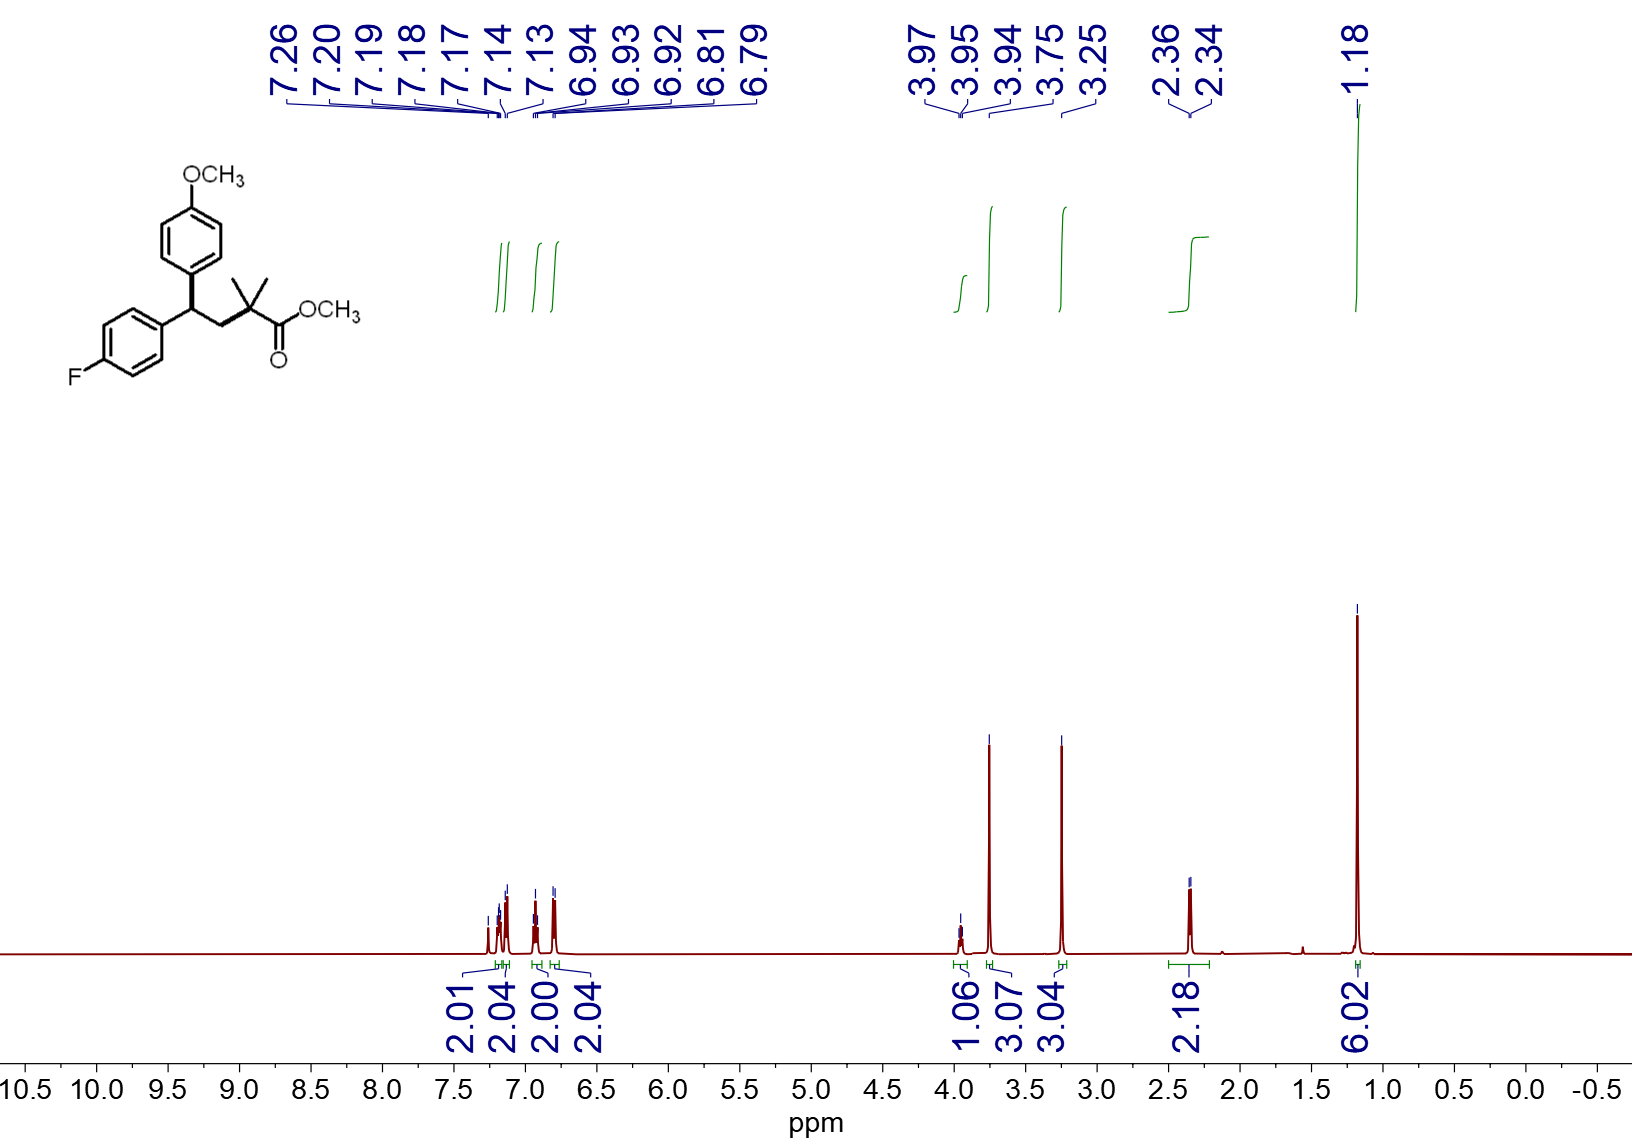


1H NMR spectrum (600 MHz, CDCl3, 23 ºC) of **4p**


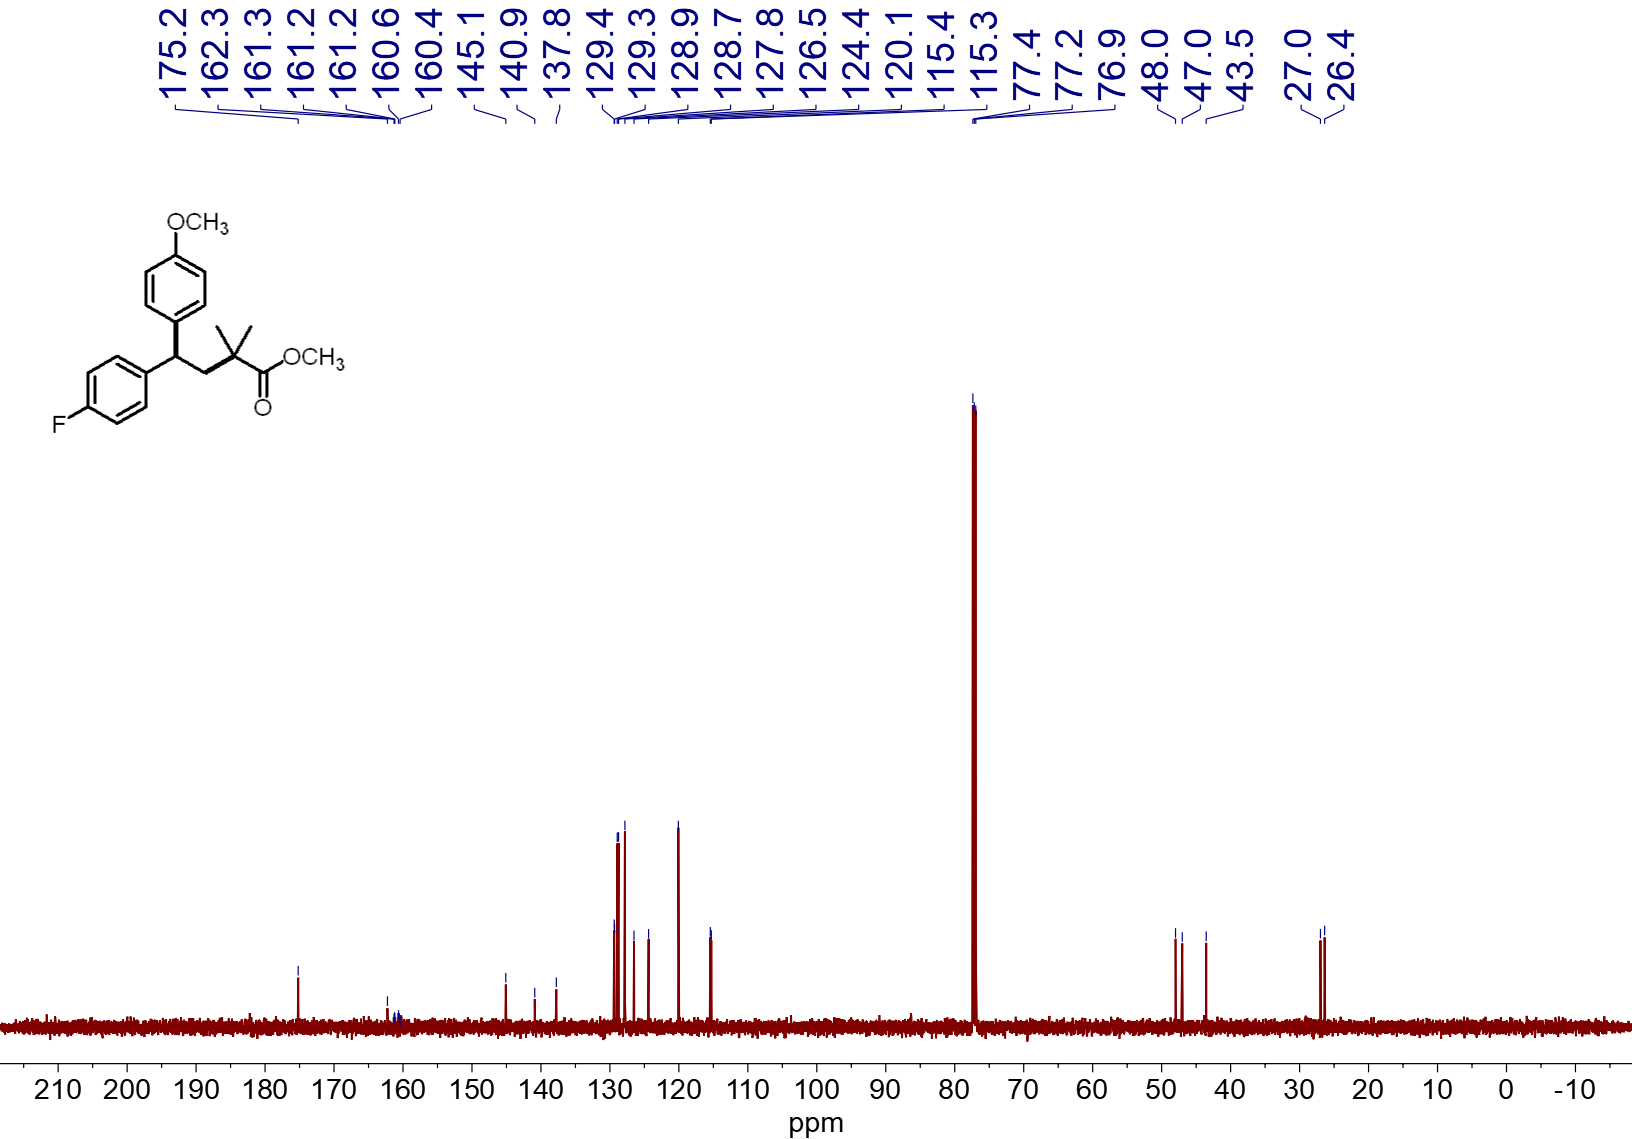


13C NMR spectrum (151 MHz, CDCl3, 23 ºC) of **4p**


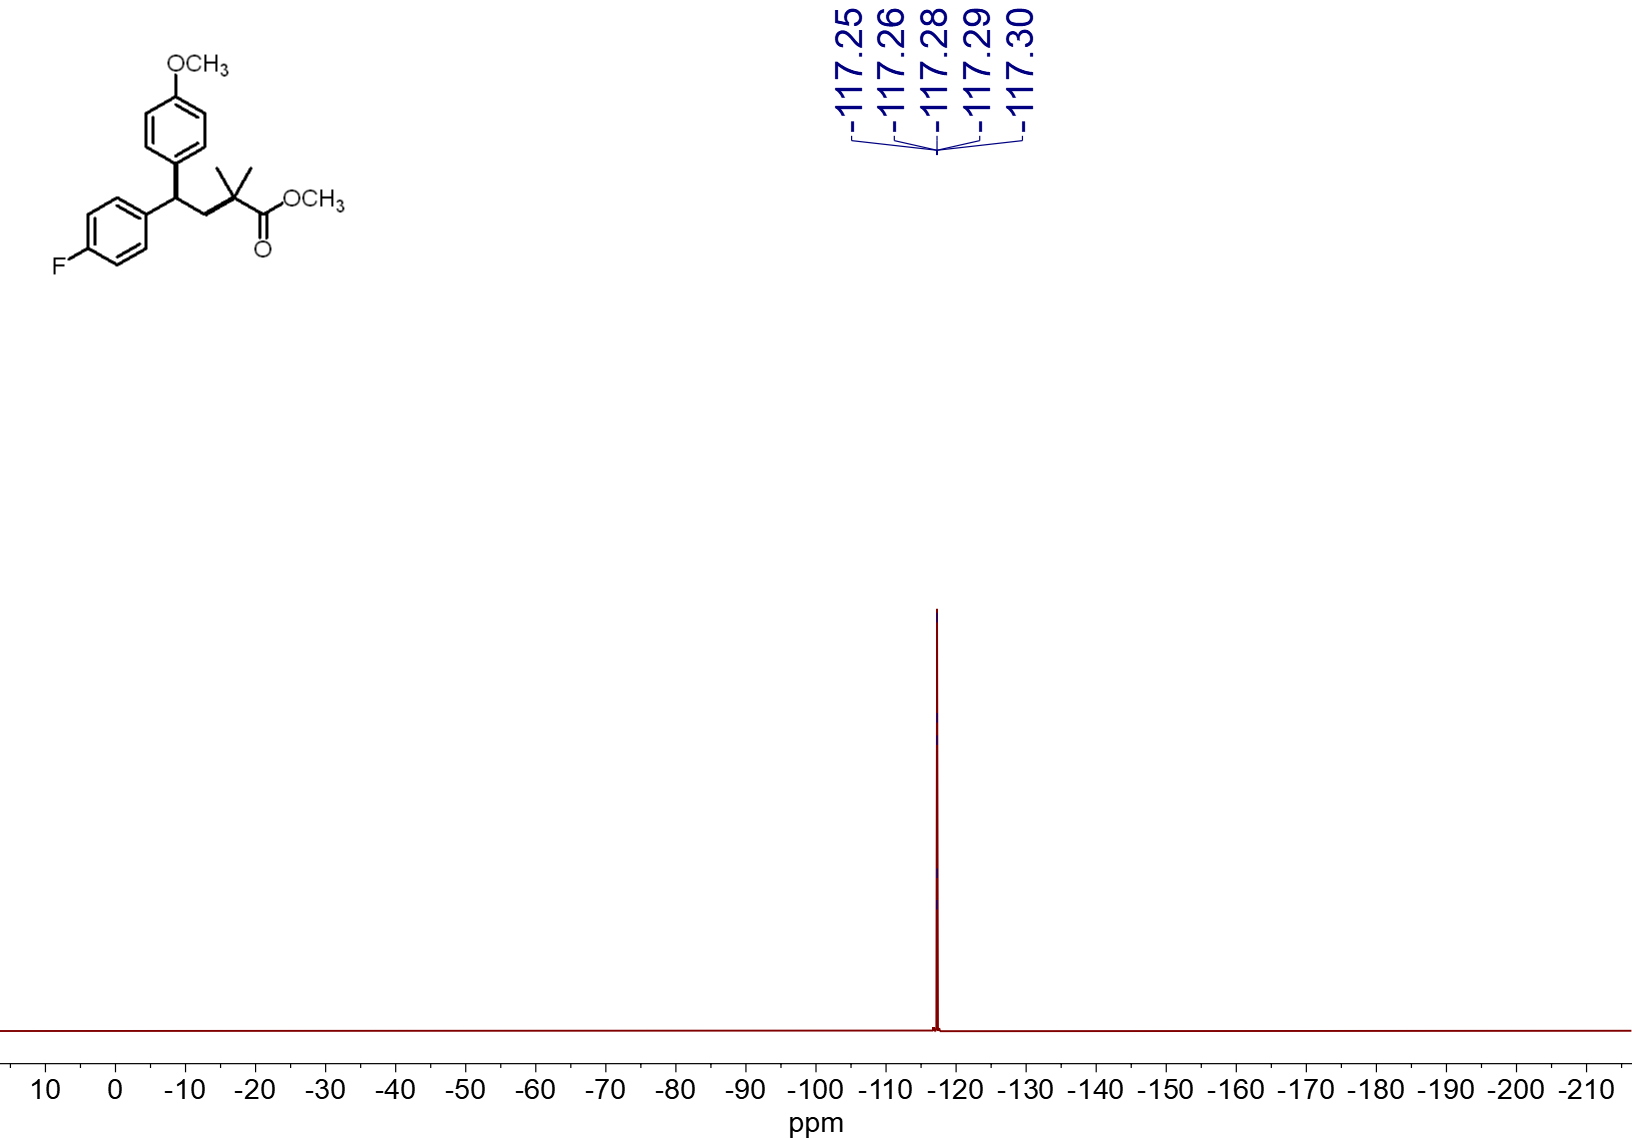


19F NMR spectrum (565 MHz, CDCl3, 23 ºC) of **4p**


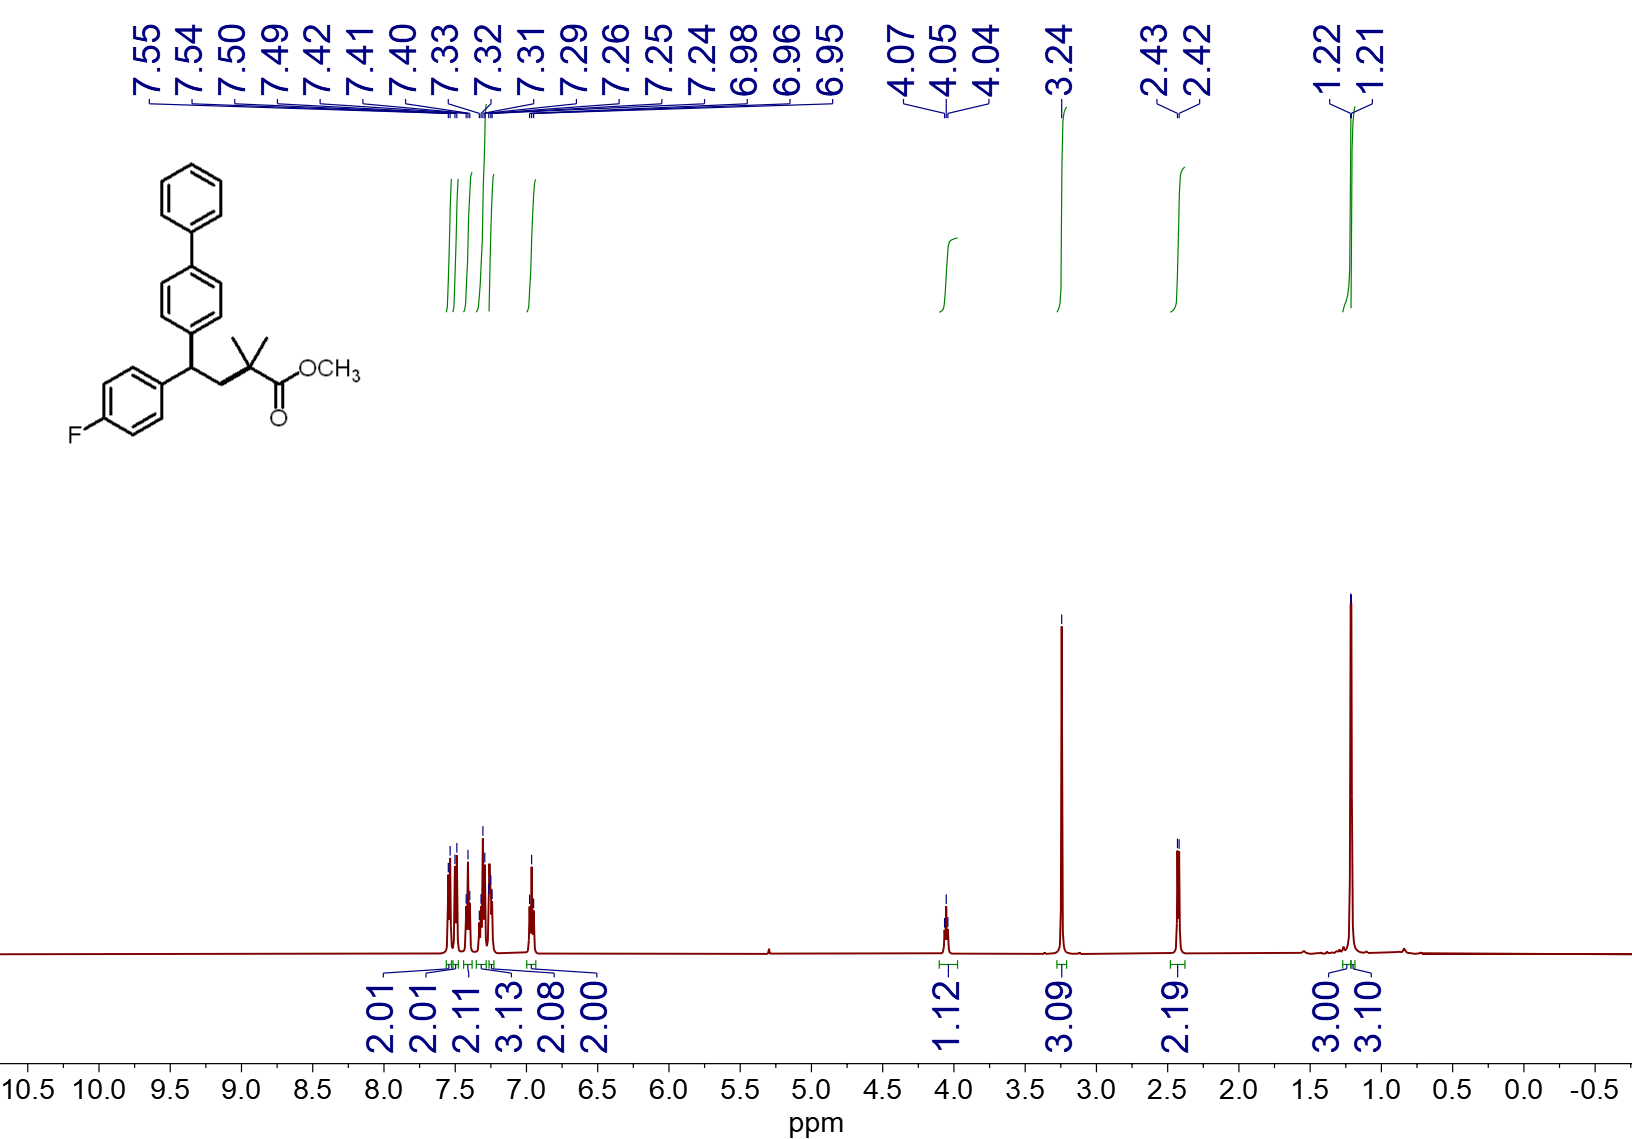
 1H NMR spectrum (600 MHz, CDCl3, 23 ºC) of **4q**


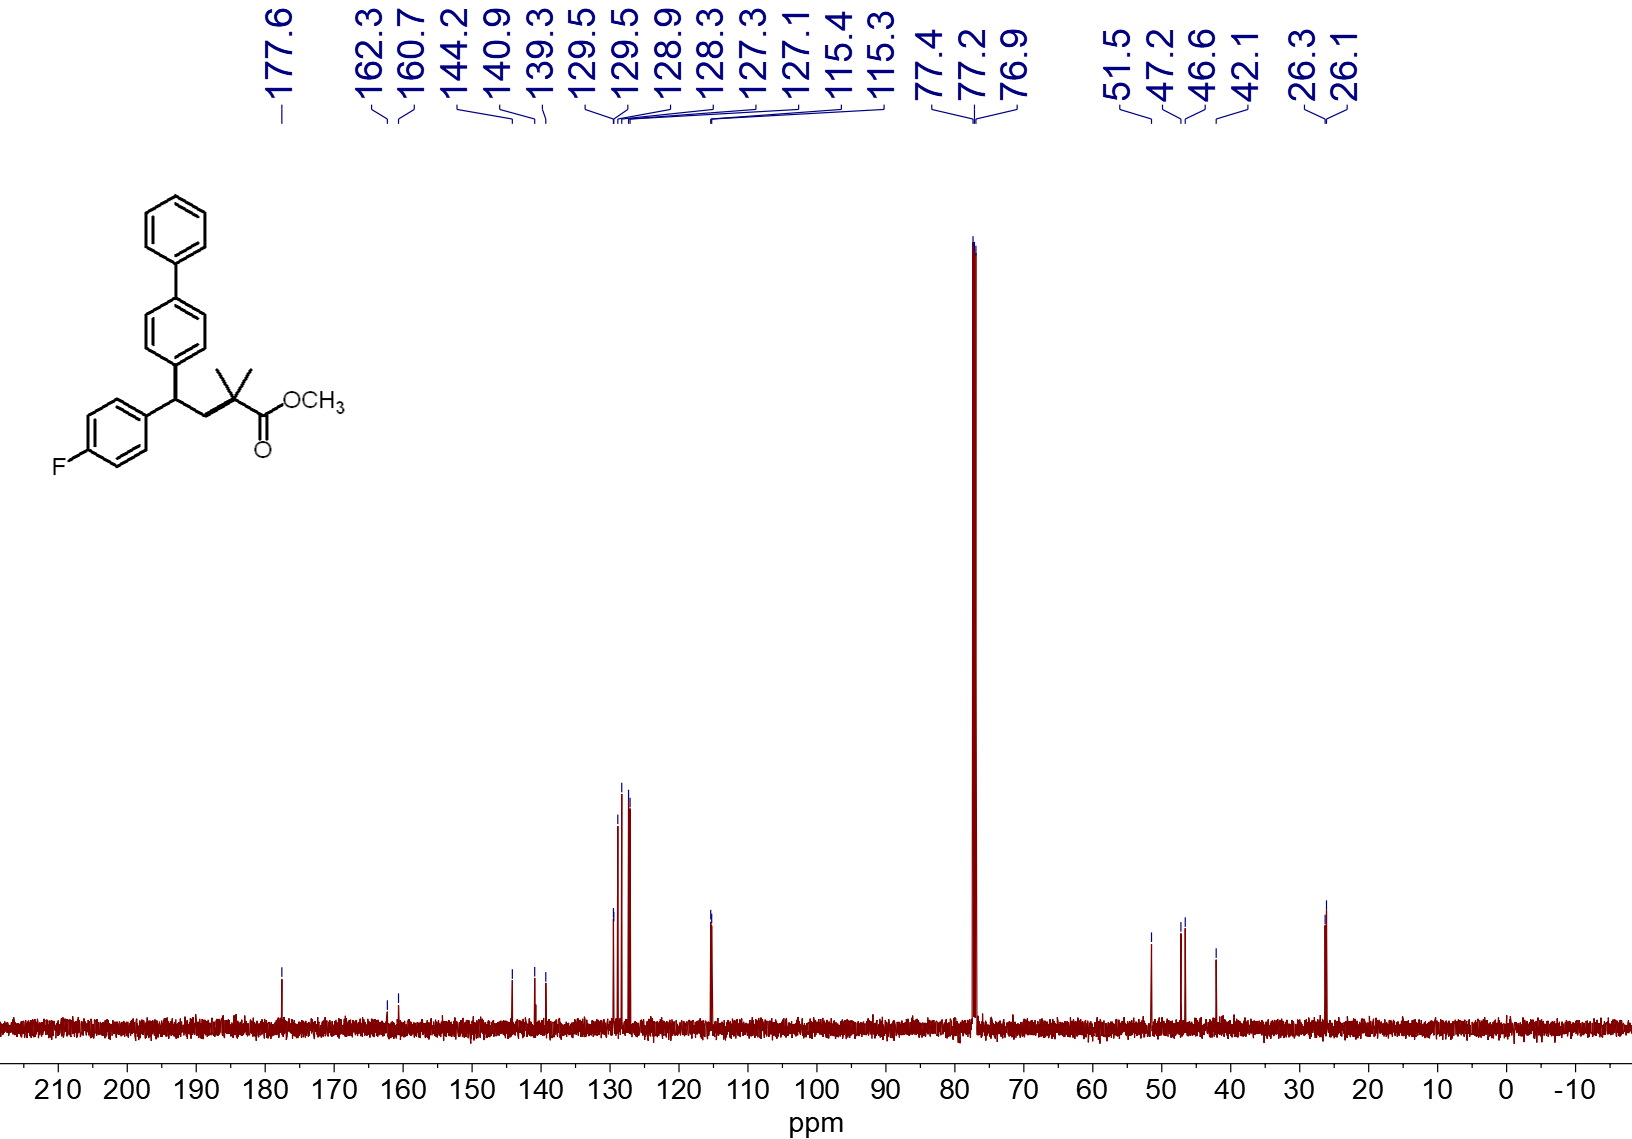


13C NMR spectrum (151 MHz, CDCl3, 23 ºC) of **4q**


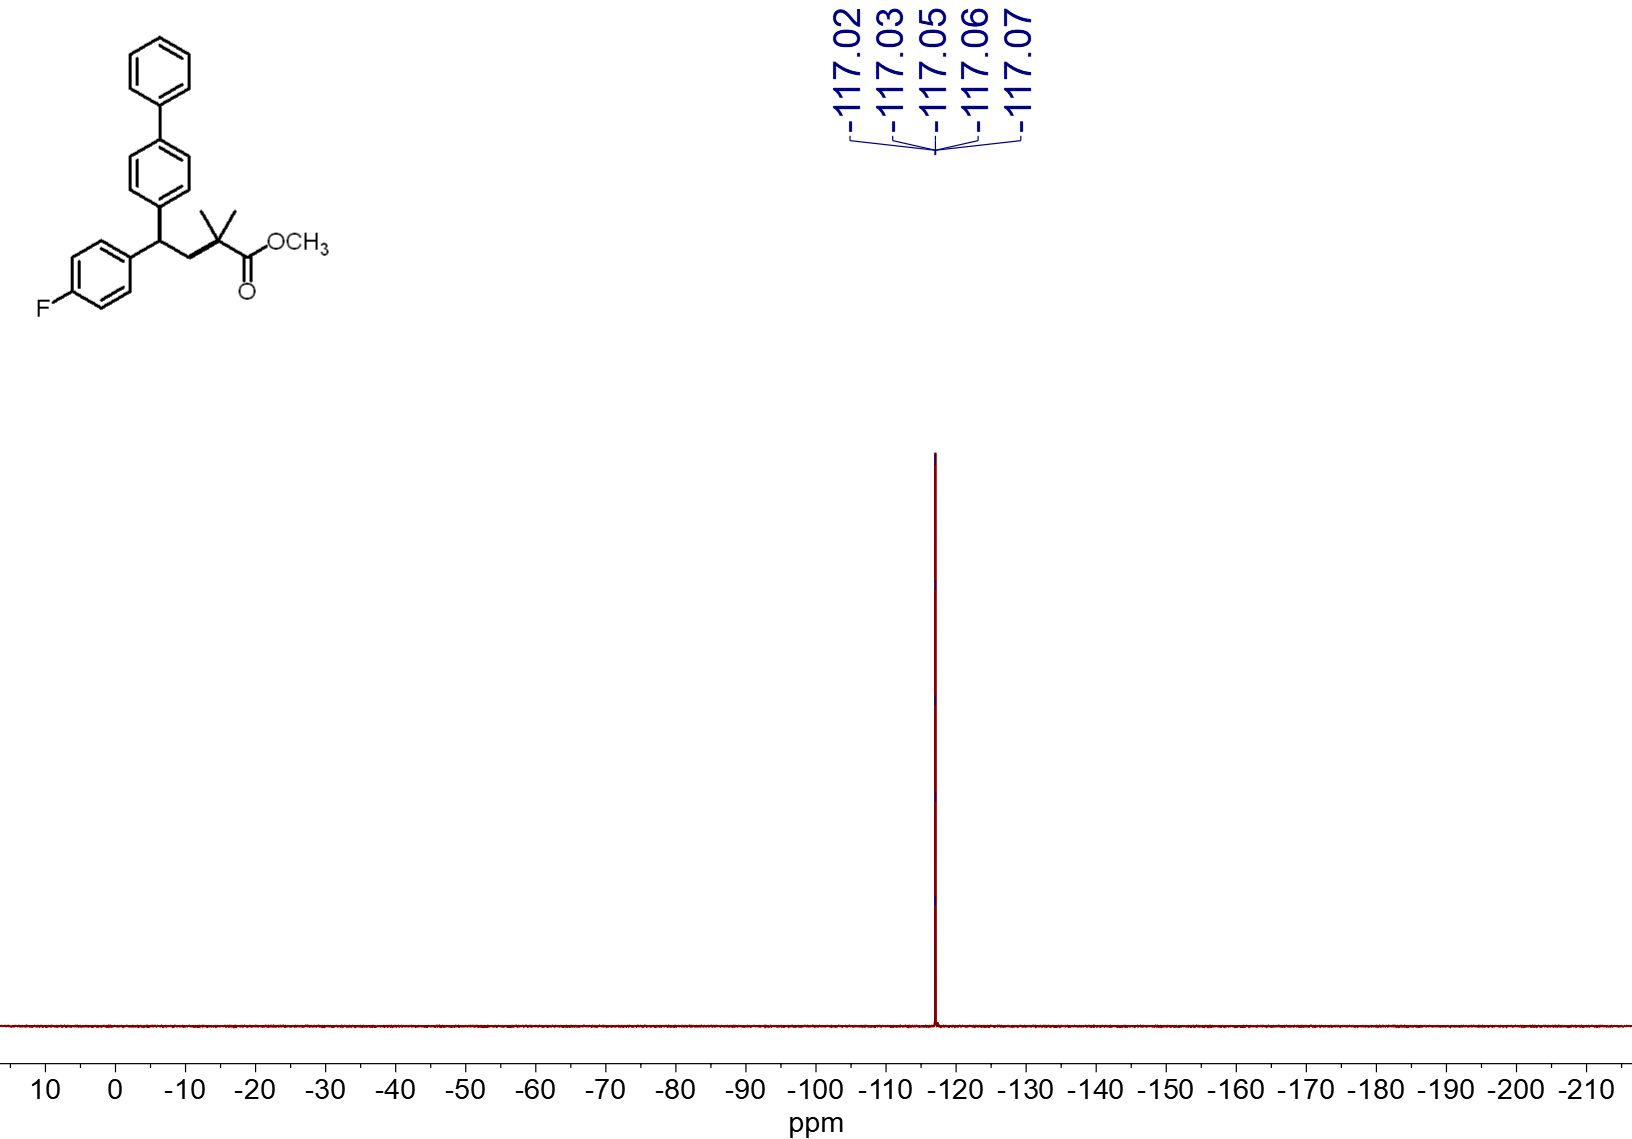


19F NMR spectrum (565 MHz, CDCl3, 23 ºC) of **4q**


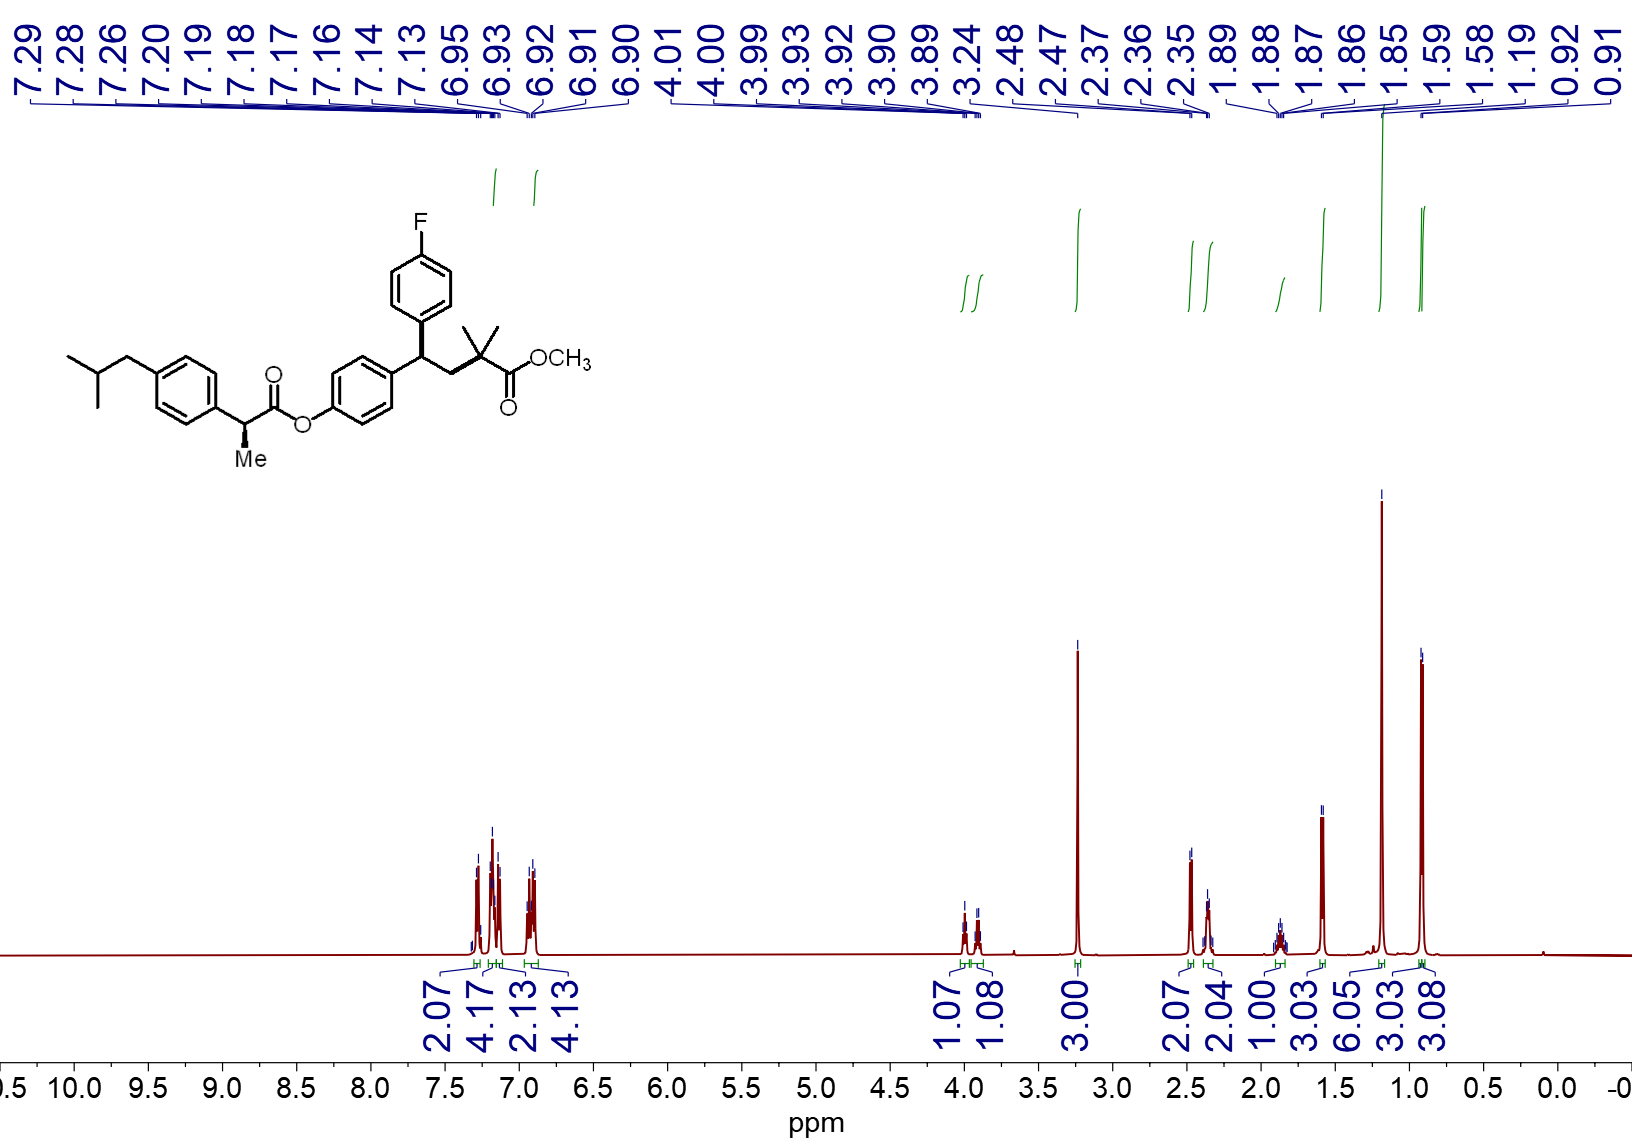


1H NMR spectrum (600 MHz, CDCl3, 23 ºC) of **4r**


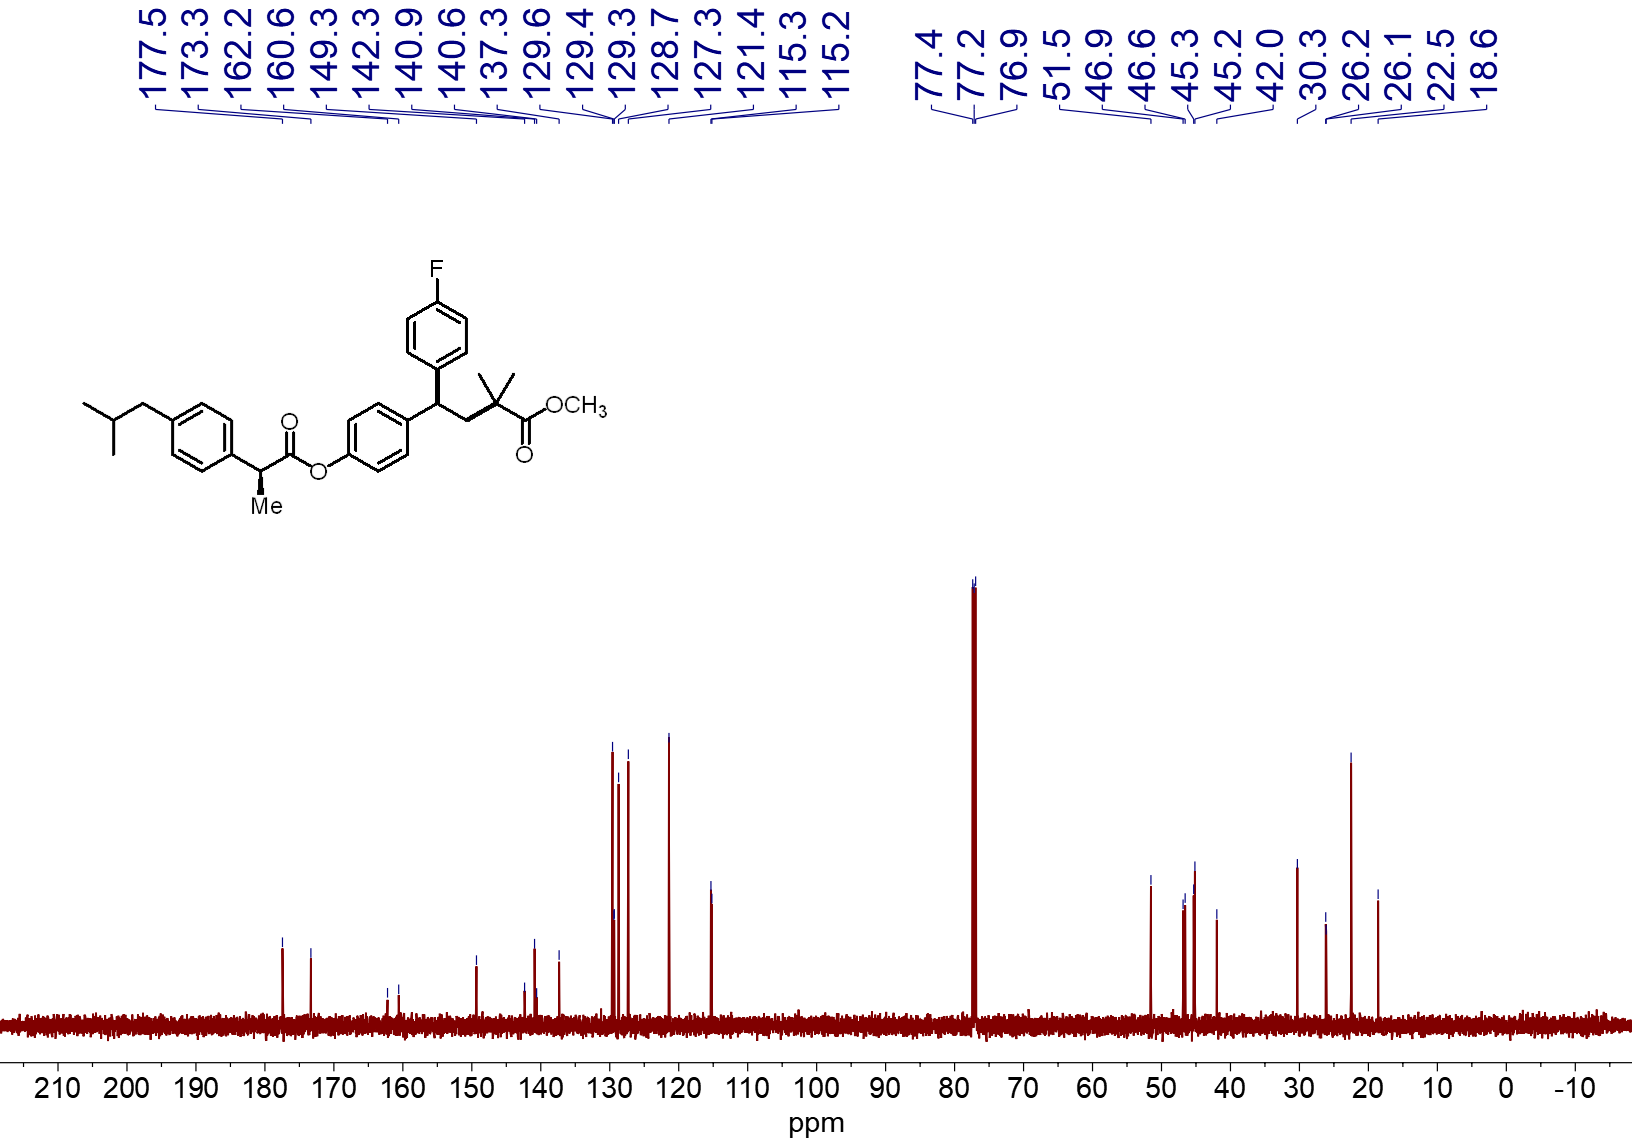
13C NMR spectrum (151 MHz, CDCl3, 23 ºC) of **4r**


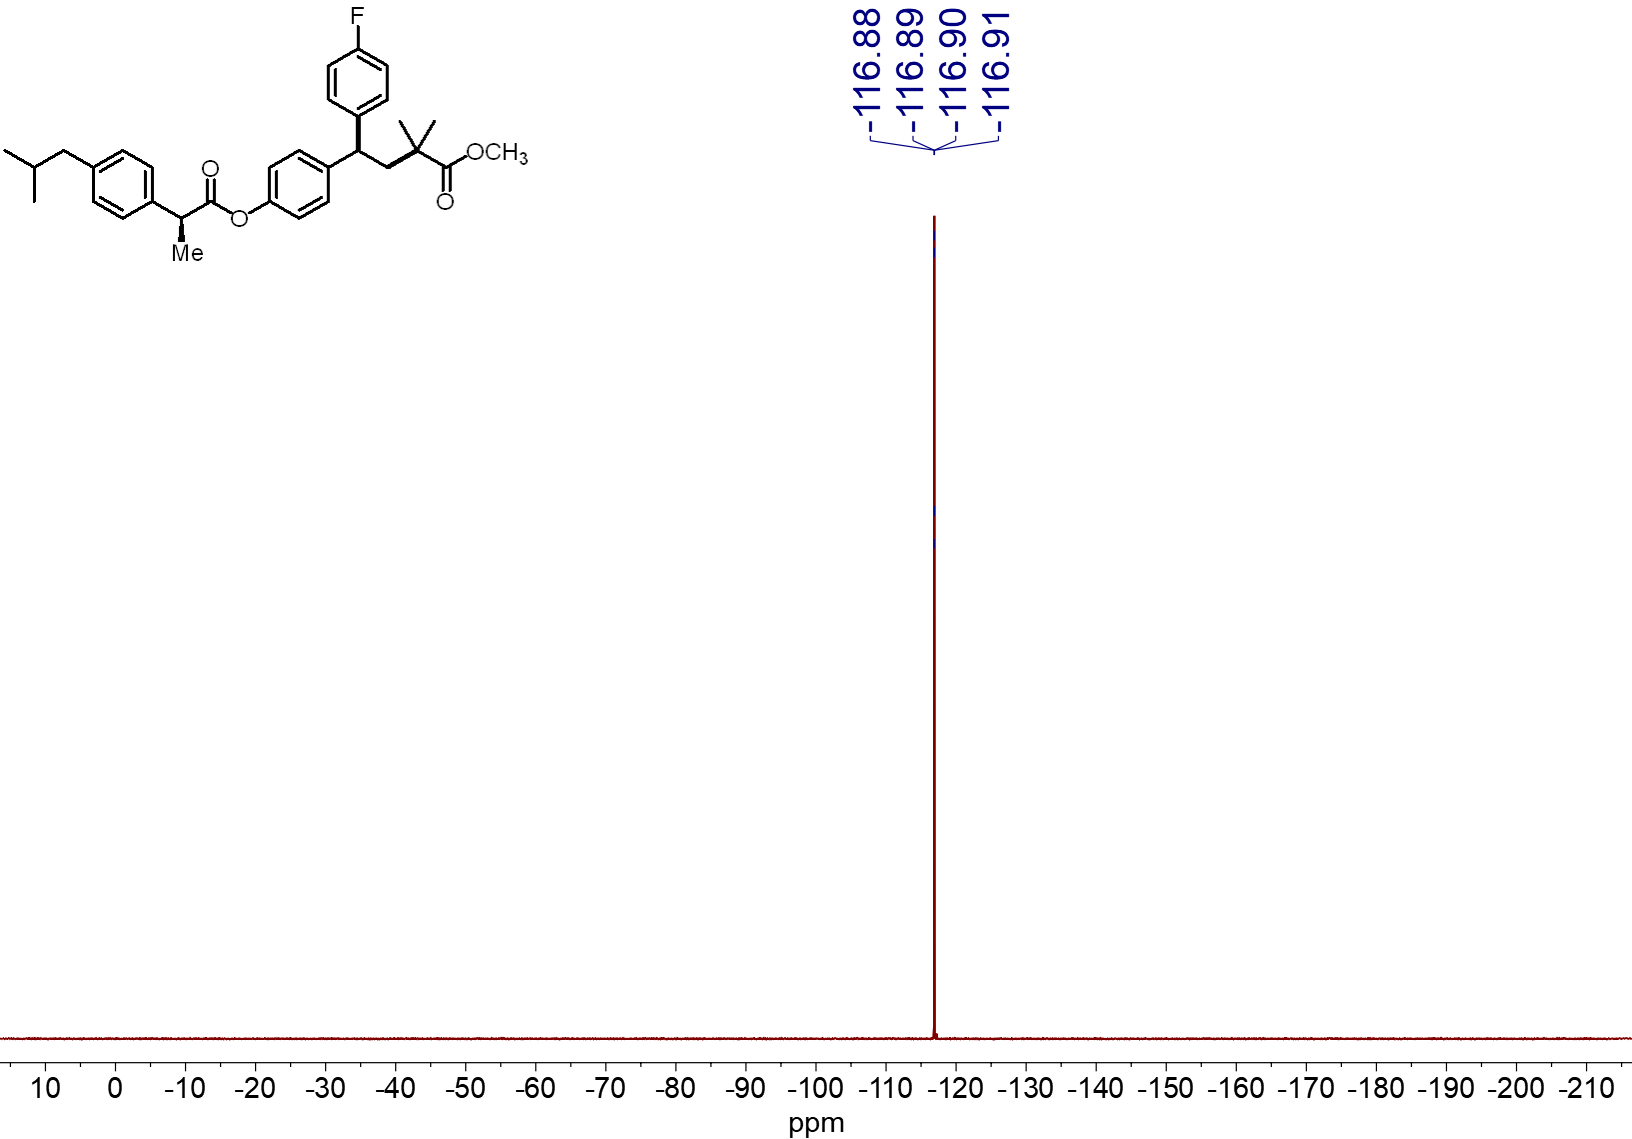
19F NMR spectrum (565 MHz, CDCl3, 23 ºC) of **4r**


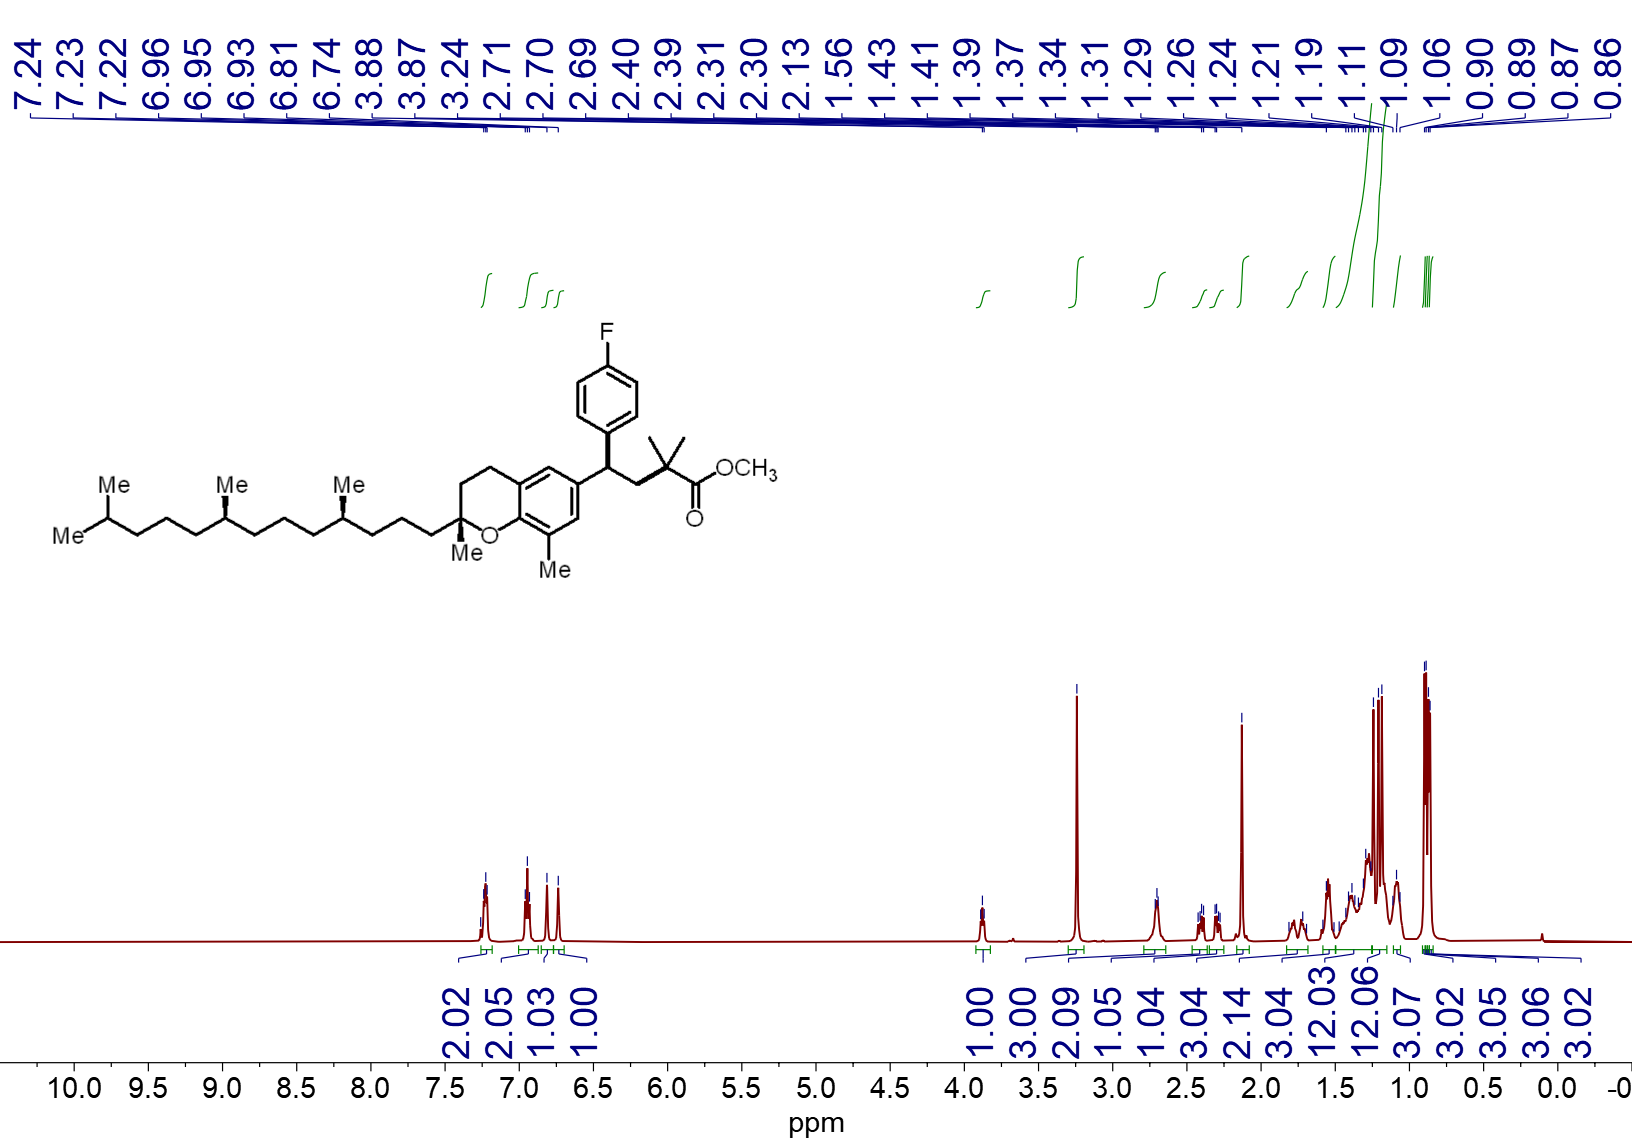
1H NMR spectrum (600 MHz, CDCl3, 23 ºC) of **4s**


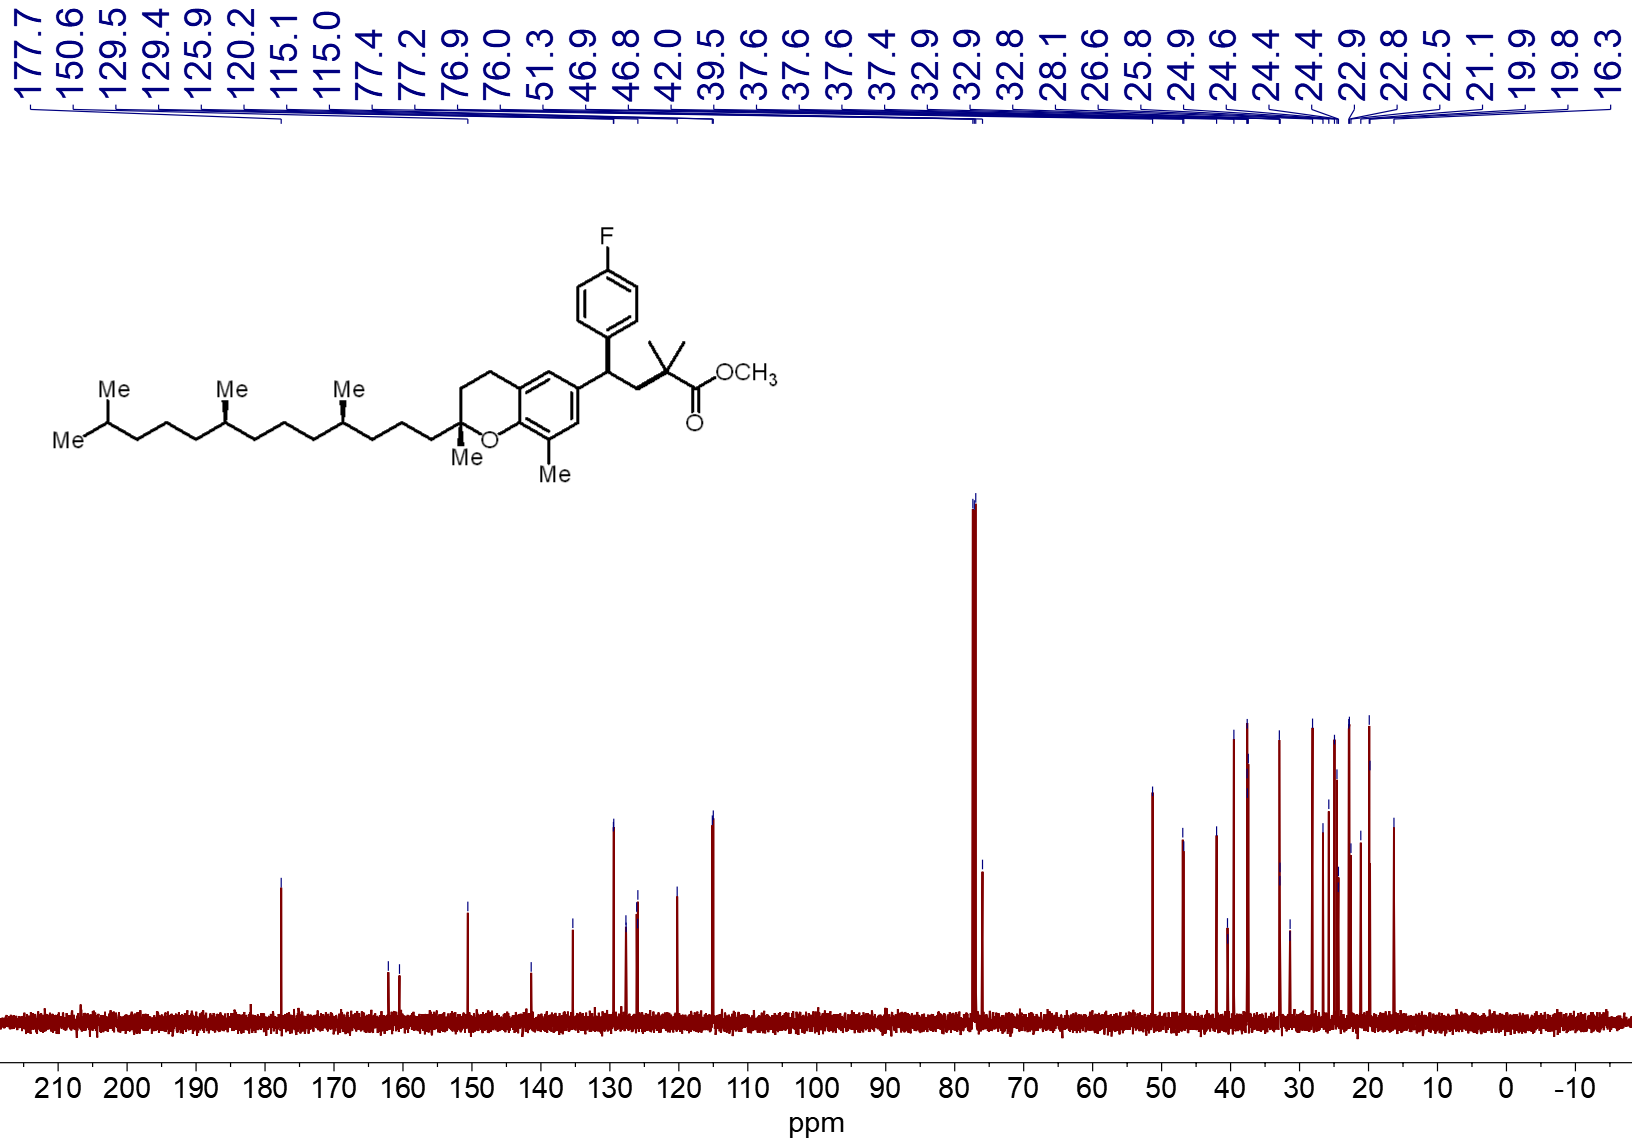
13C NMR spectrum (151 MHz, CDCl3, 23 ºC) of **4s**


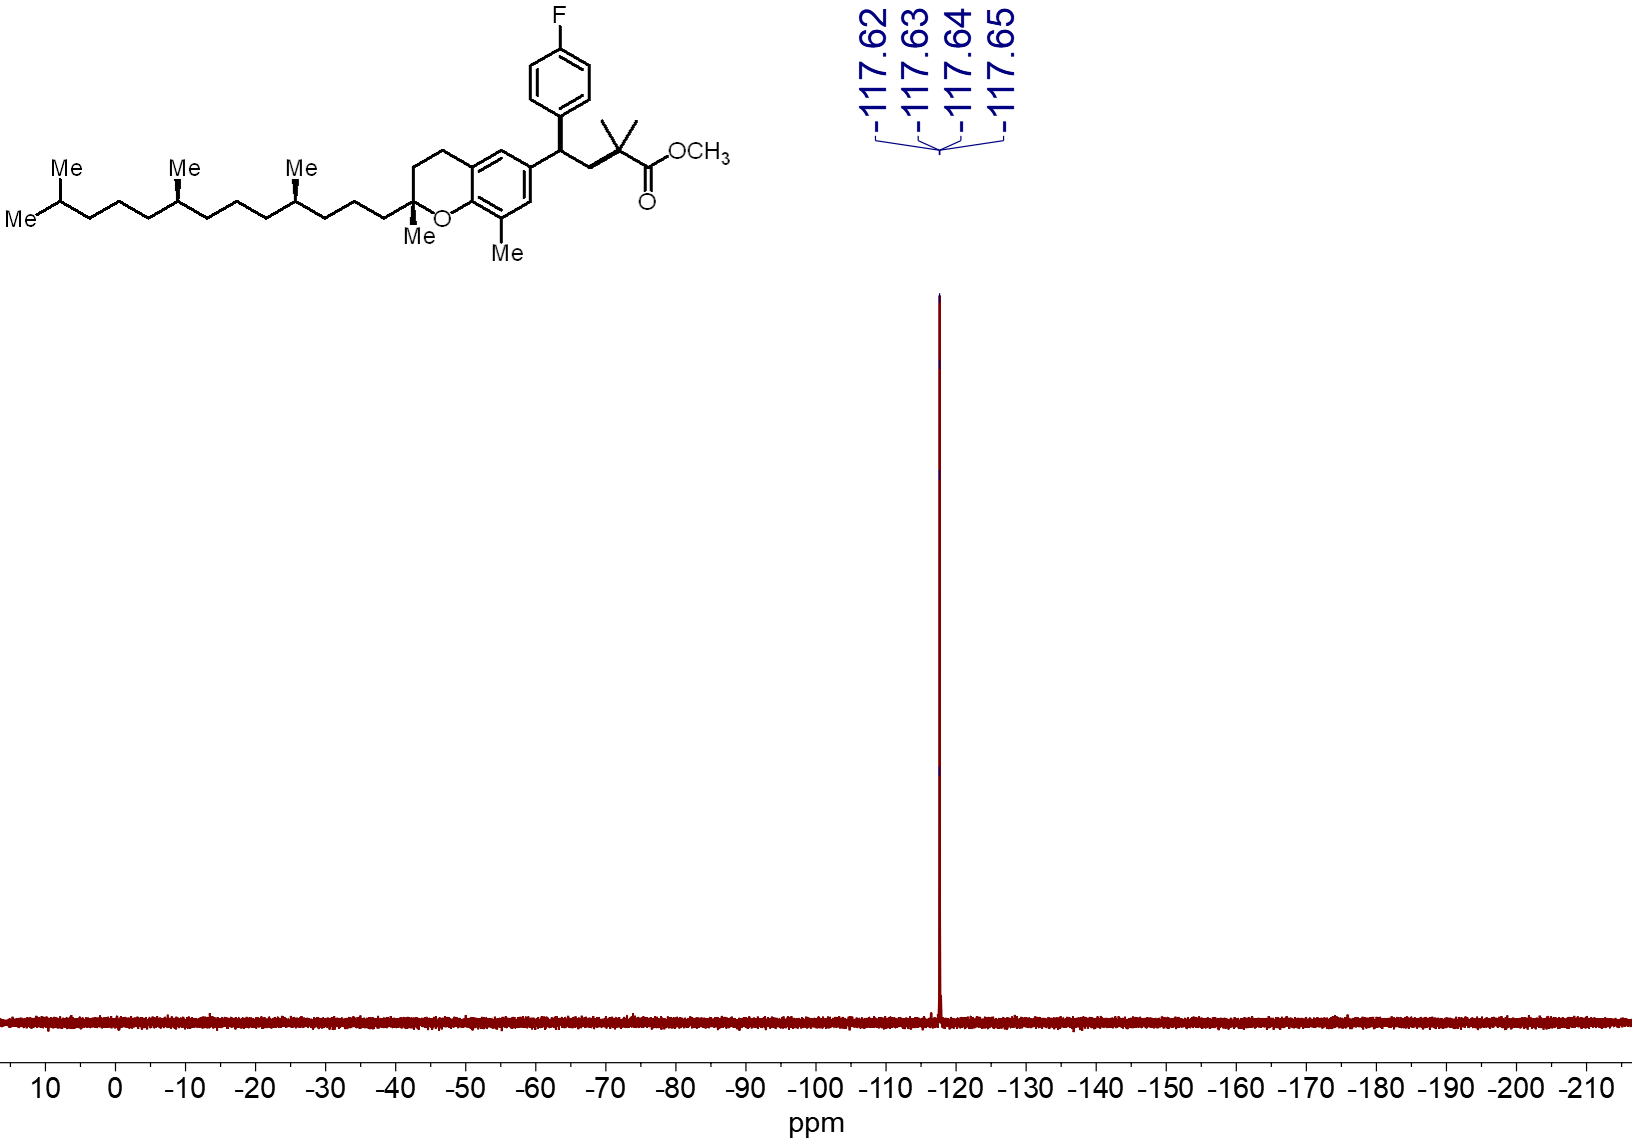
19F NMR spectrum (565 MHz, CDCl3, 23 ºC) of **4s**


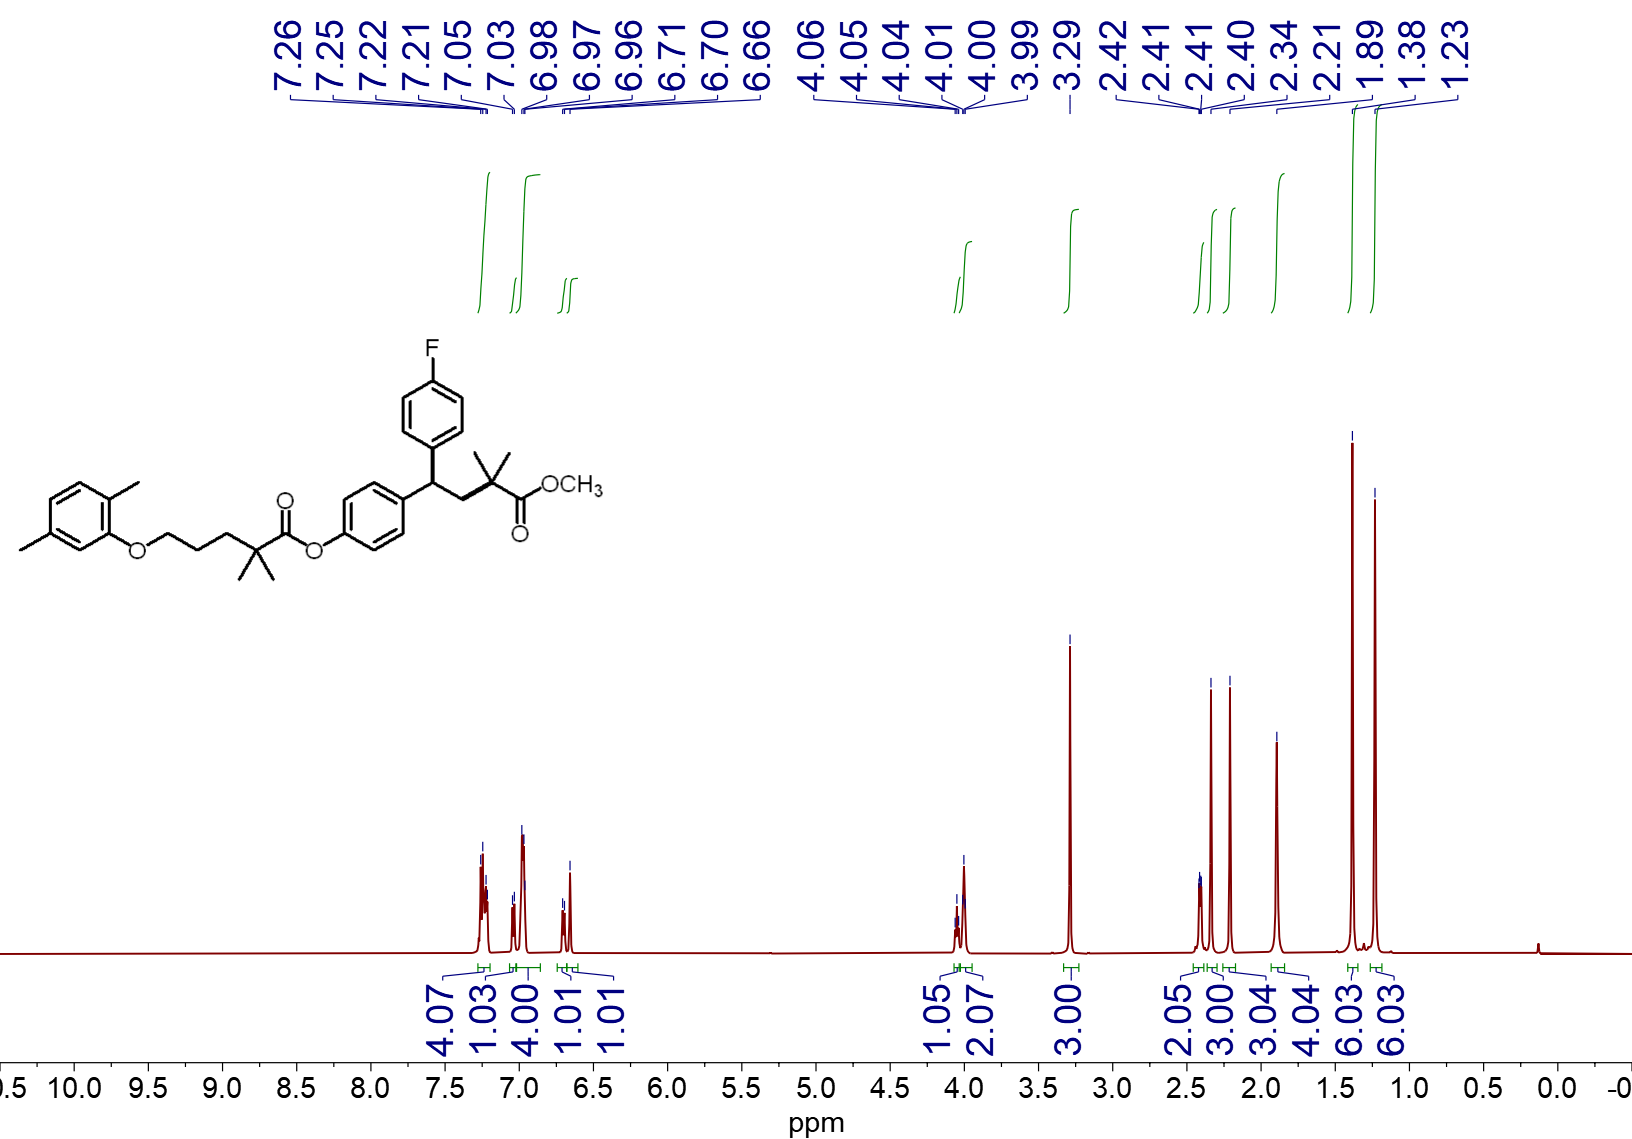
1H NMR spectrum (600 MHz, CDCl3, 23 ºC) of **4t**


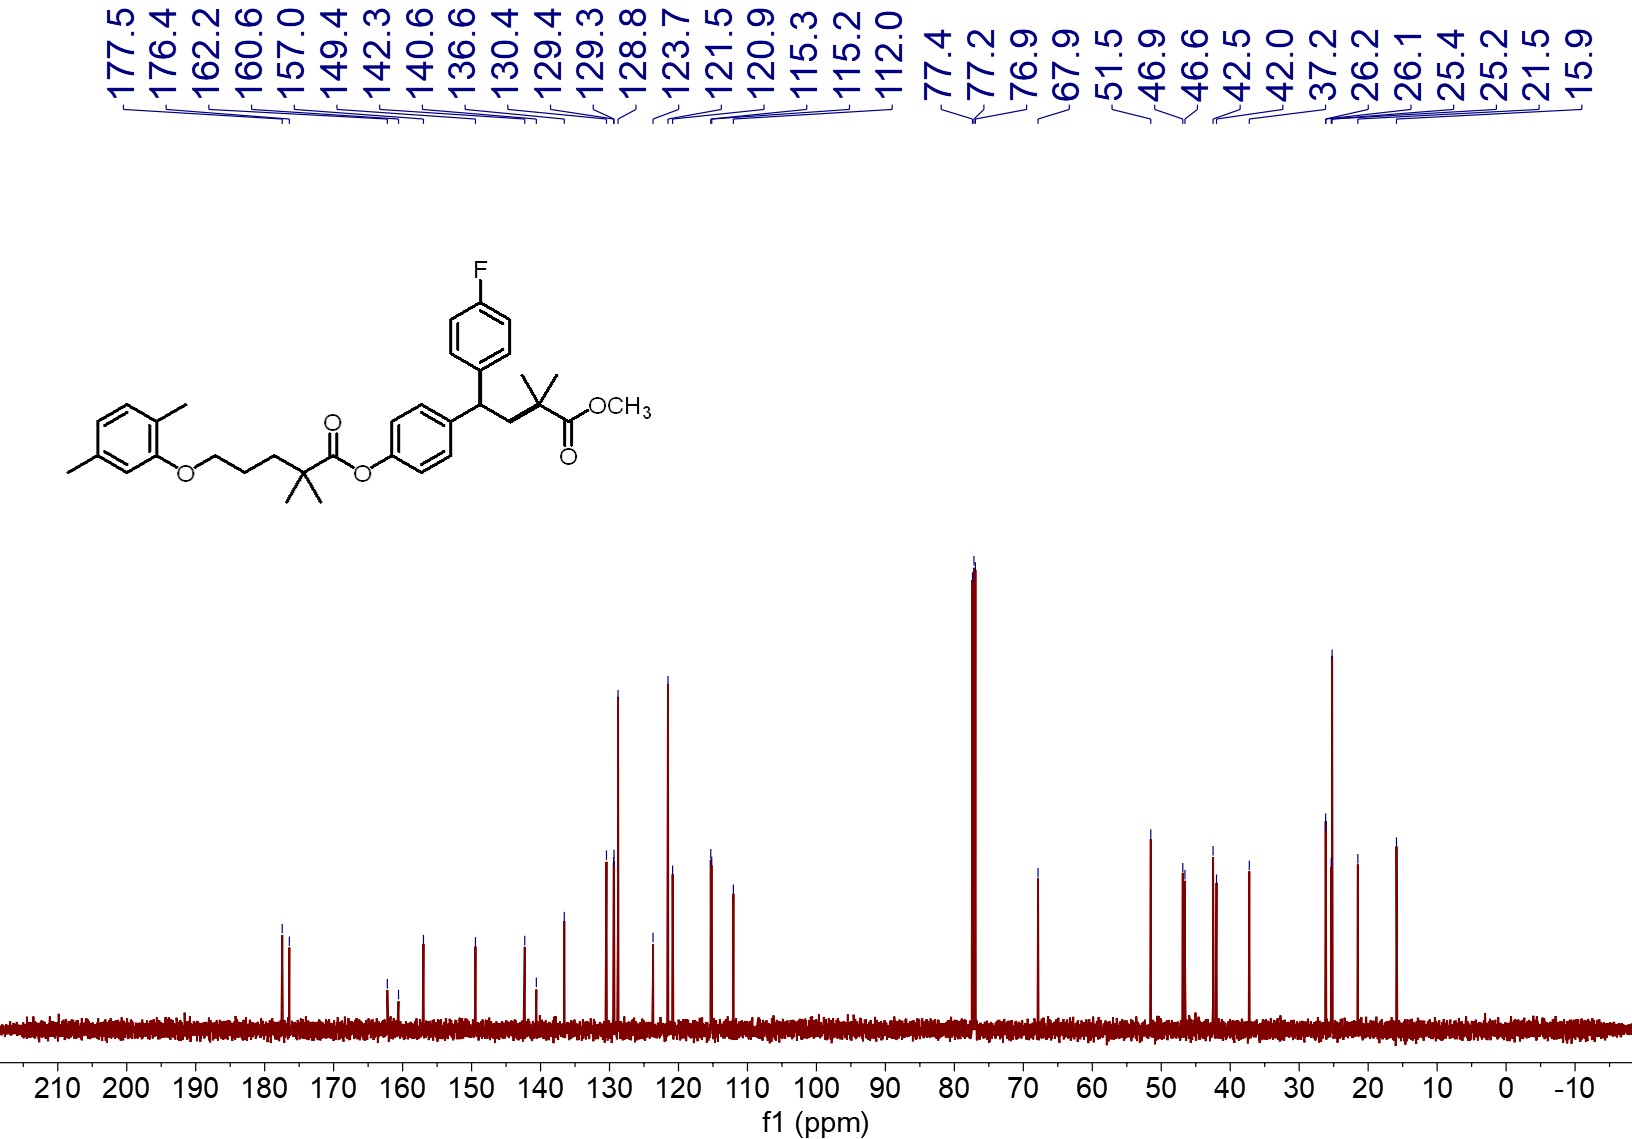
13C NMR spectrum (151 MHz, CDCl3, 23 ºC) of **4t**


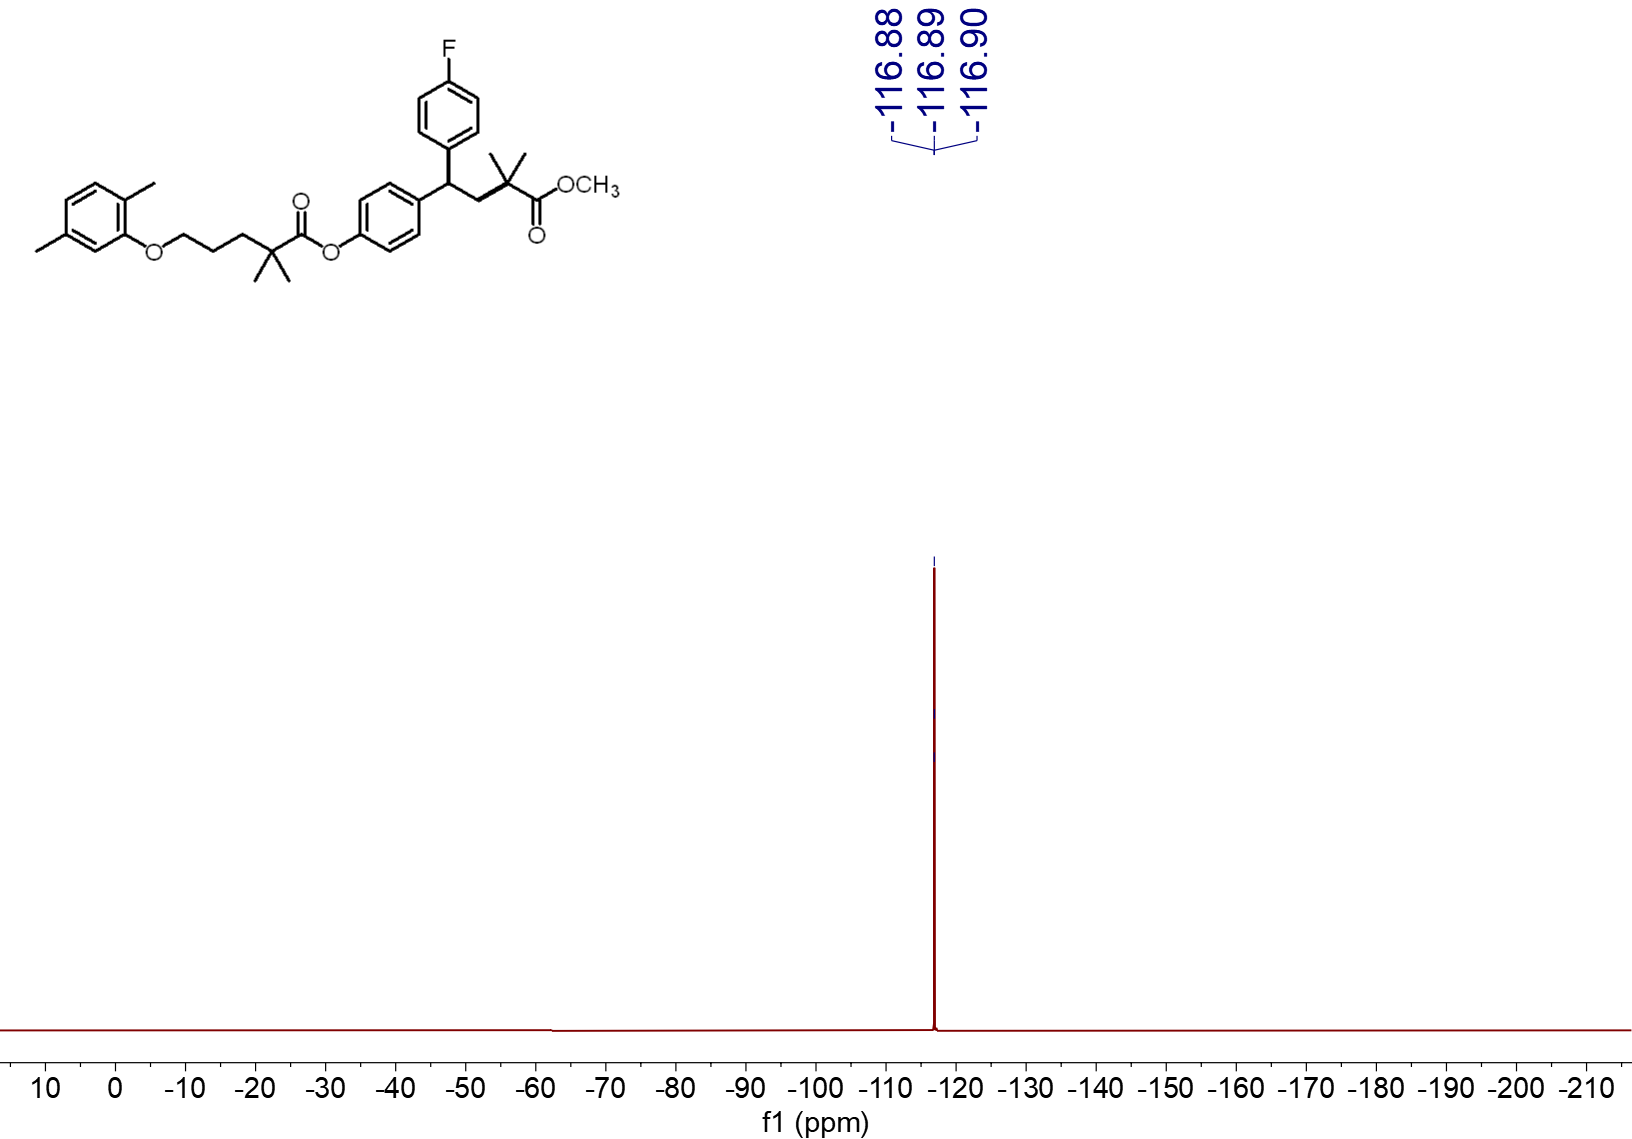
 19F NMR spectrum (565 MHz, CDCl3, 23 ºC) of **4t**


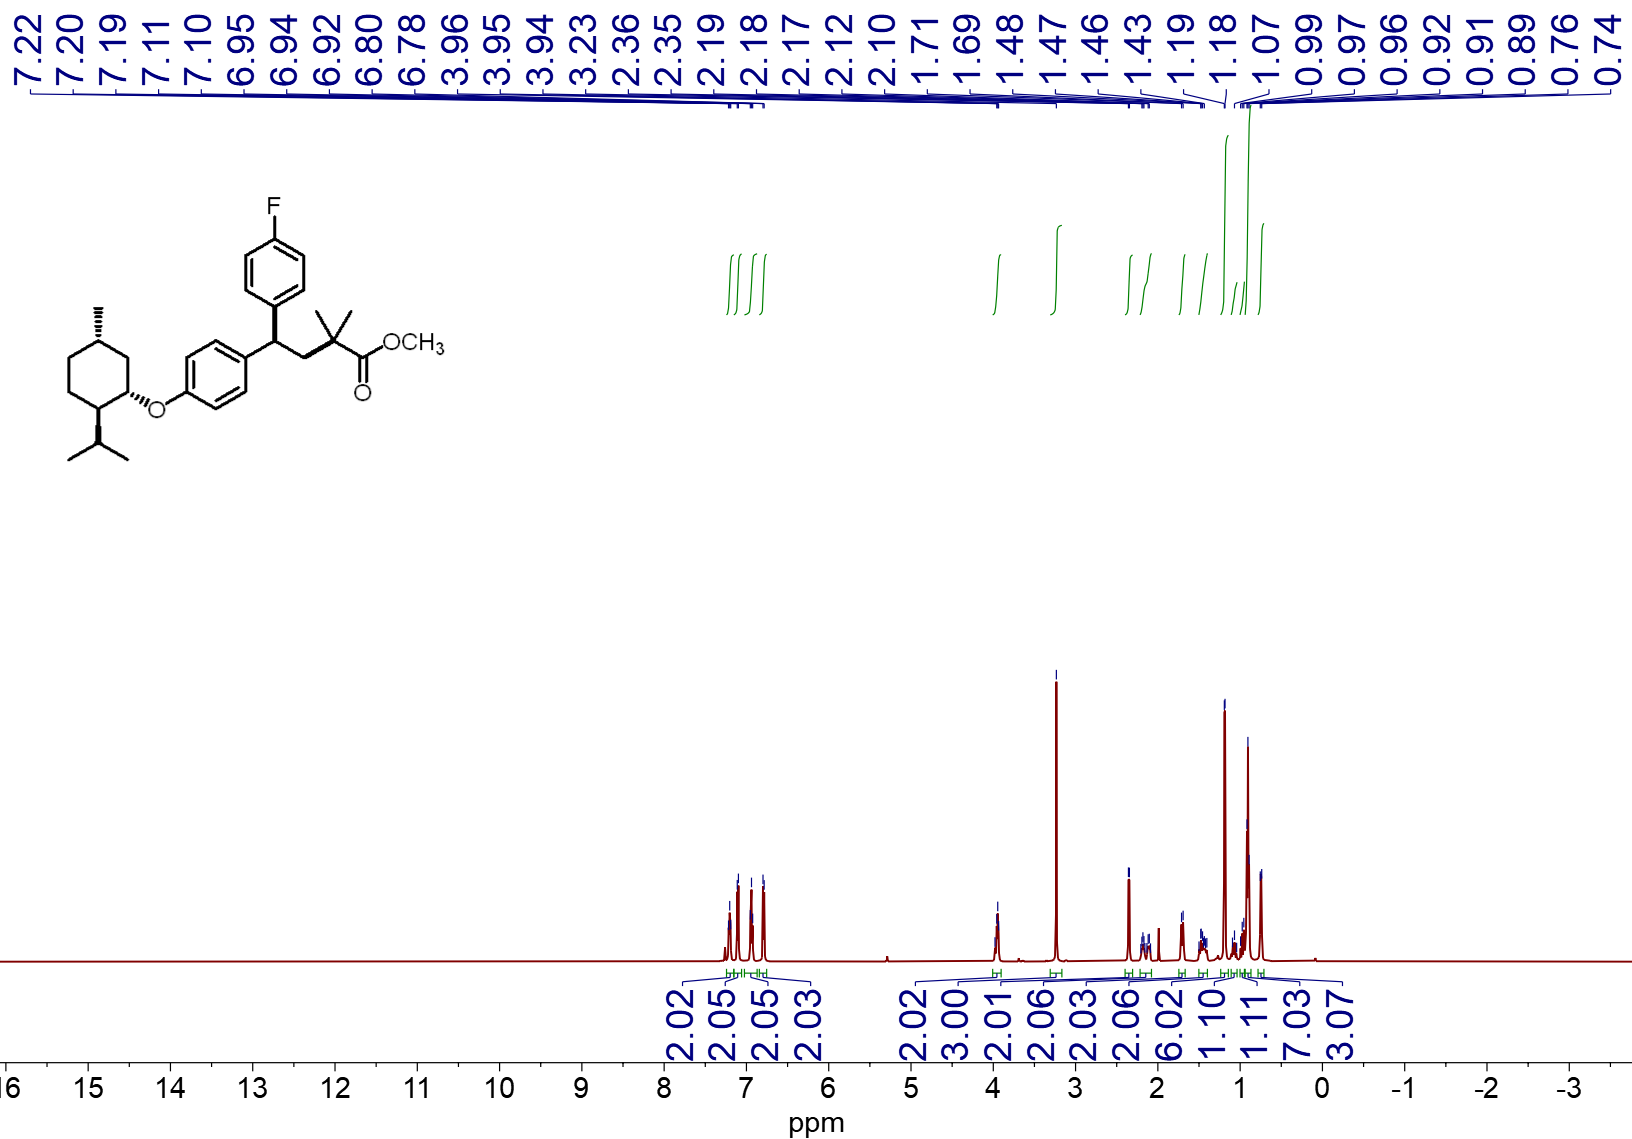
 1H NMR spectrum (600 MHz, CDCl3, 23 ºC) of **4u**


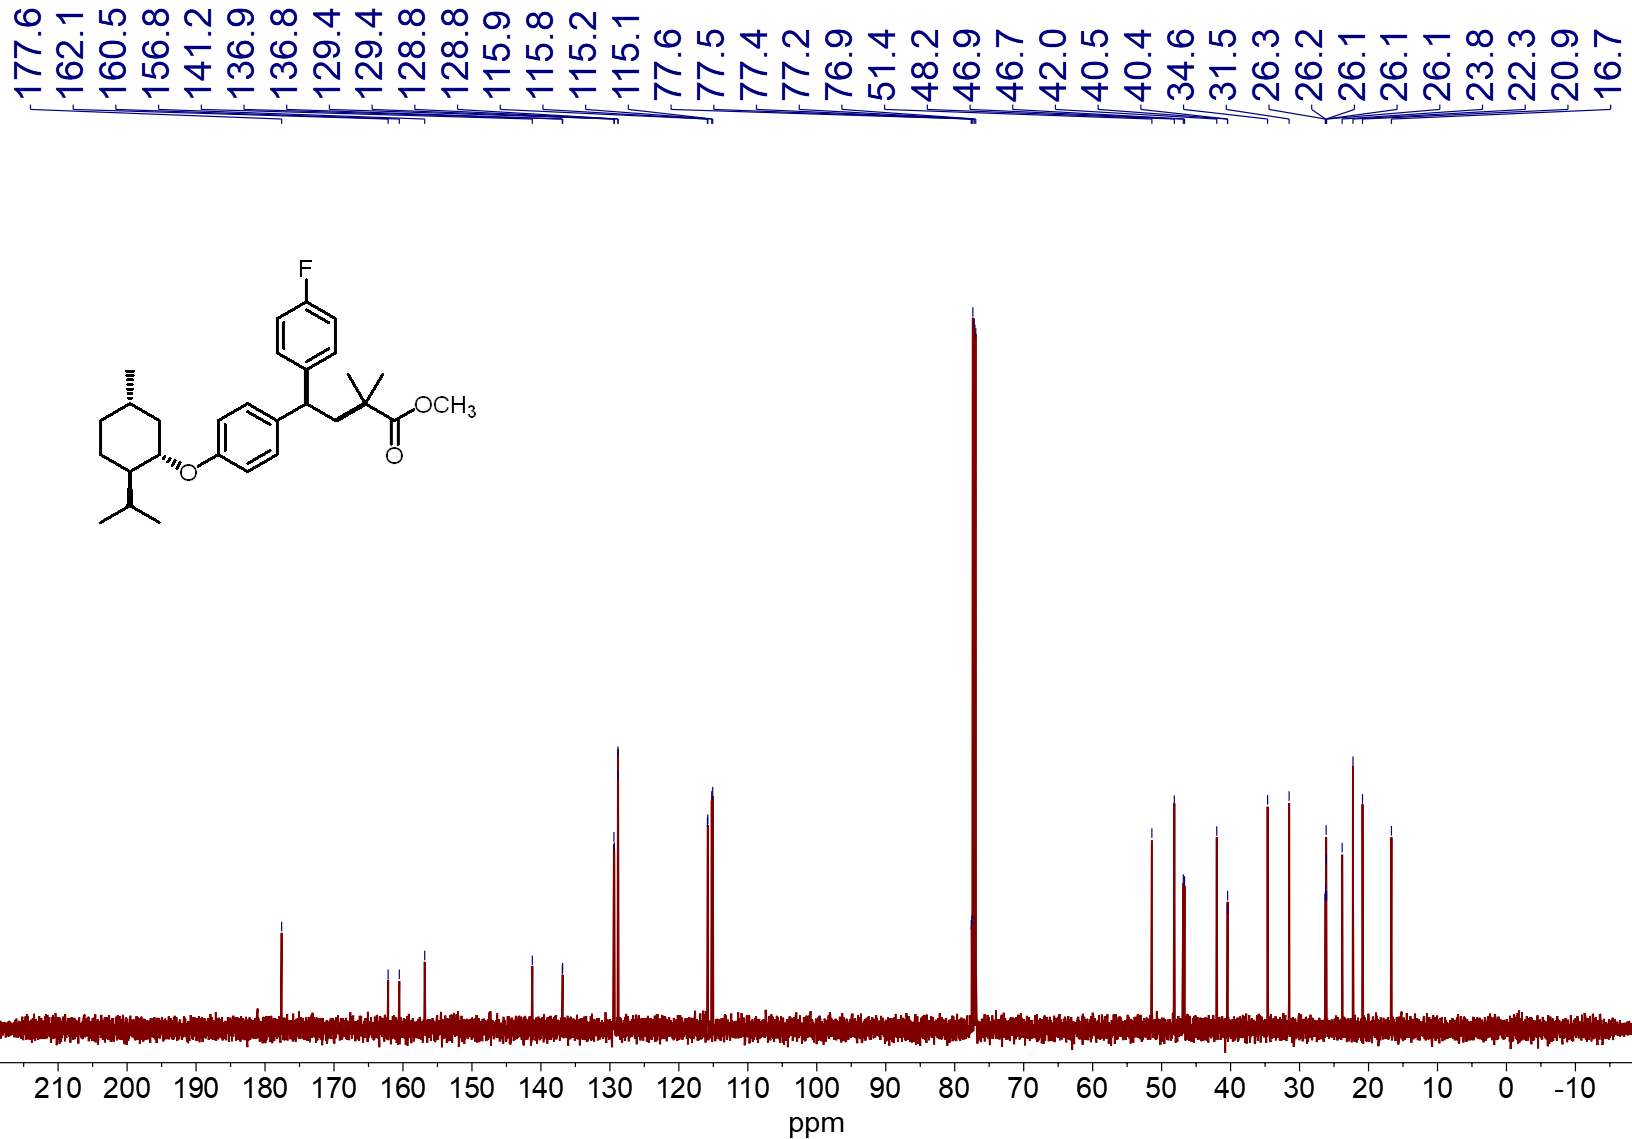
13C NMR spectrum (151 MHz, CDCl3, 23 ºC) of **4u**


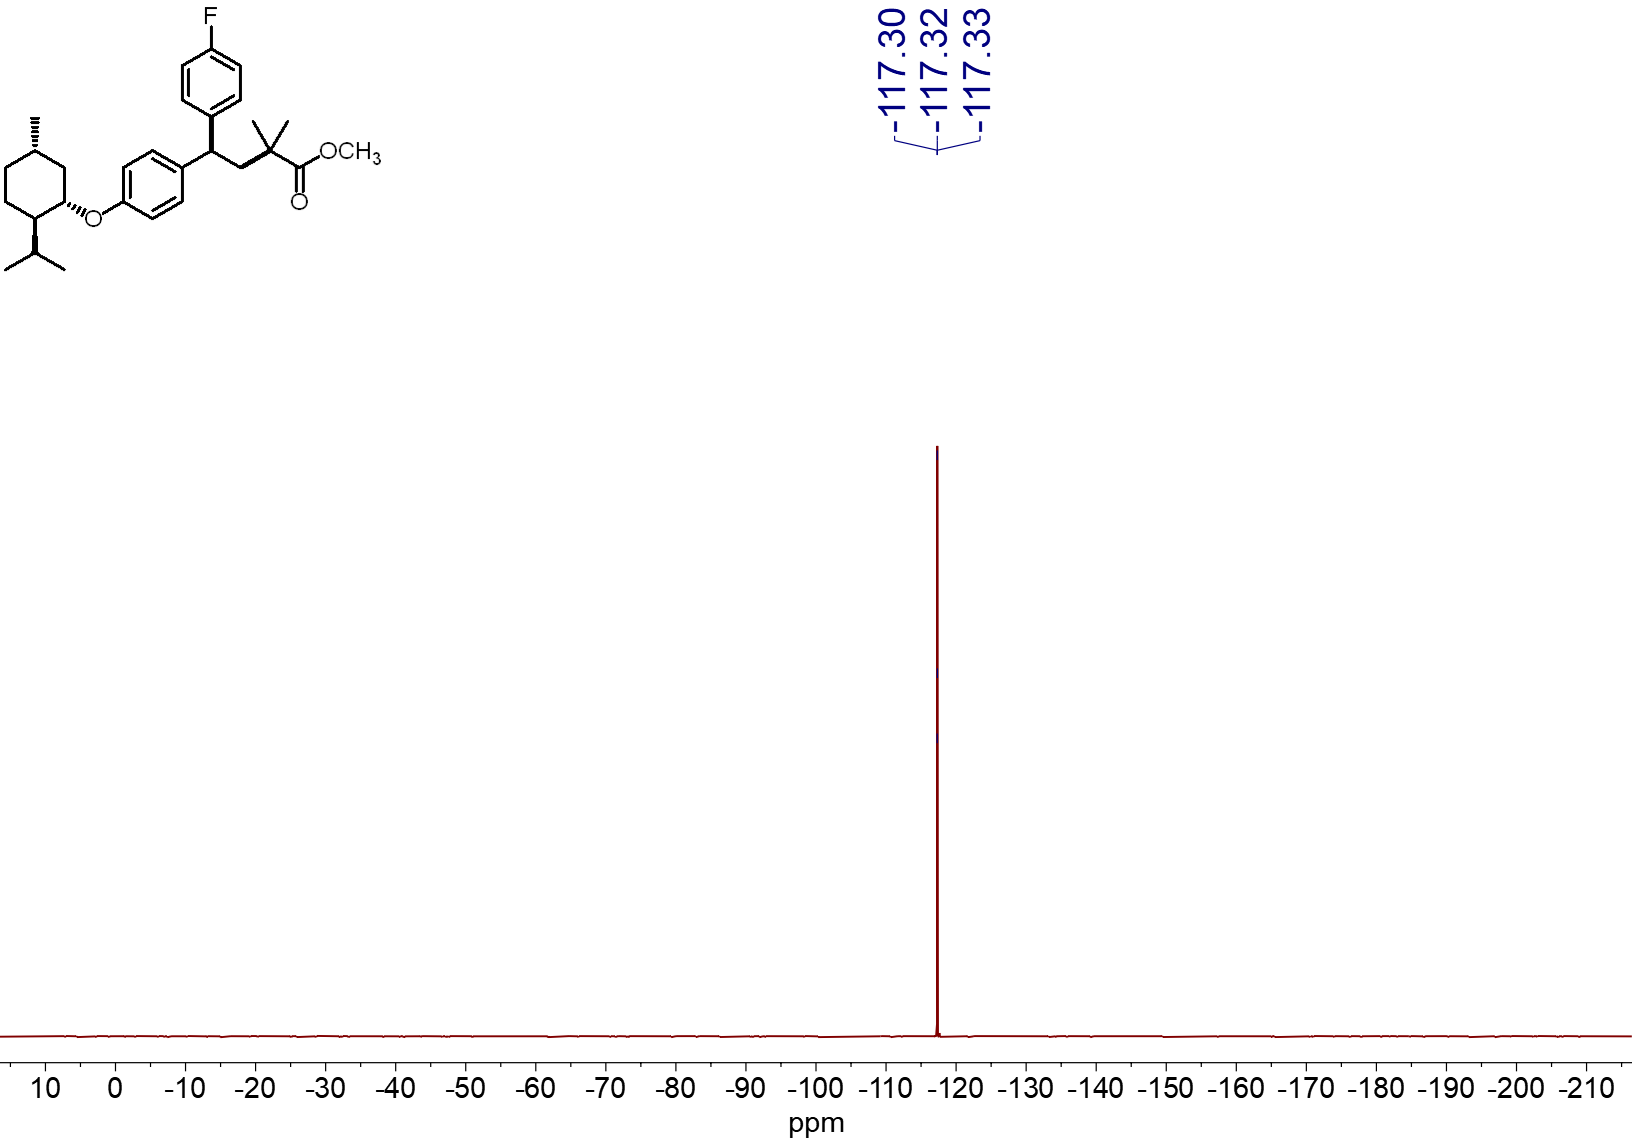


19F NMR spectrum (565 MHz, CDCl3, 23 ºC) of **4u**


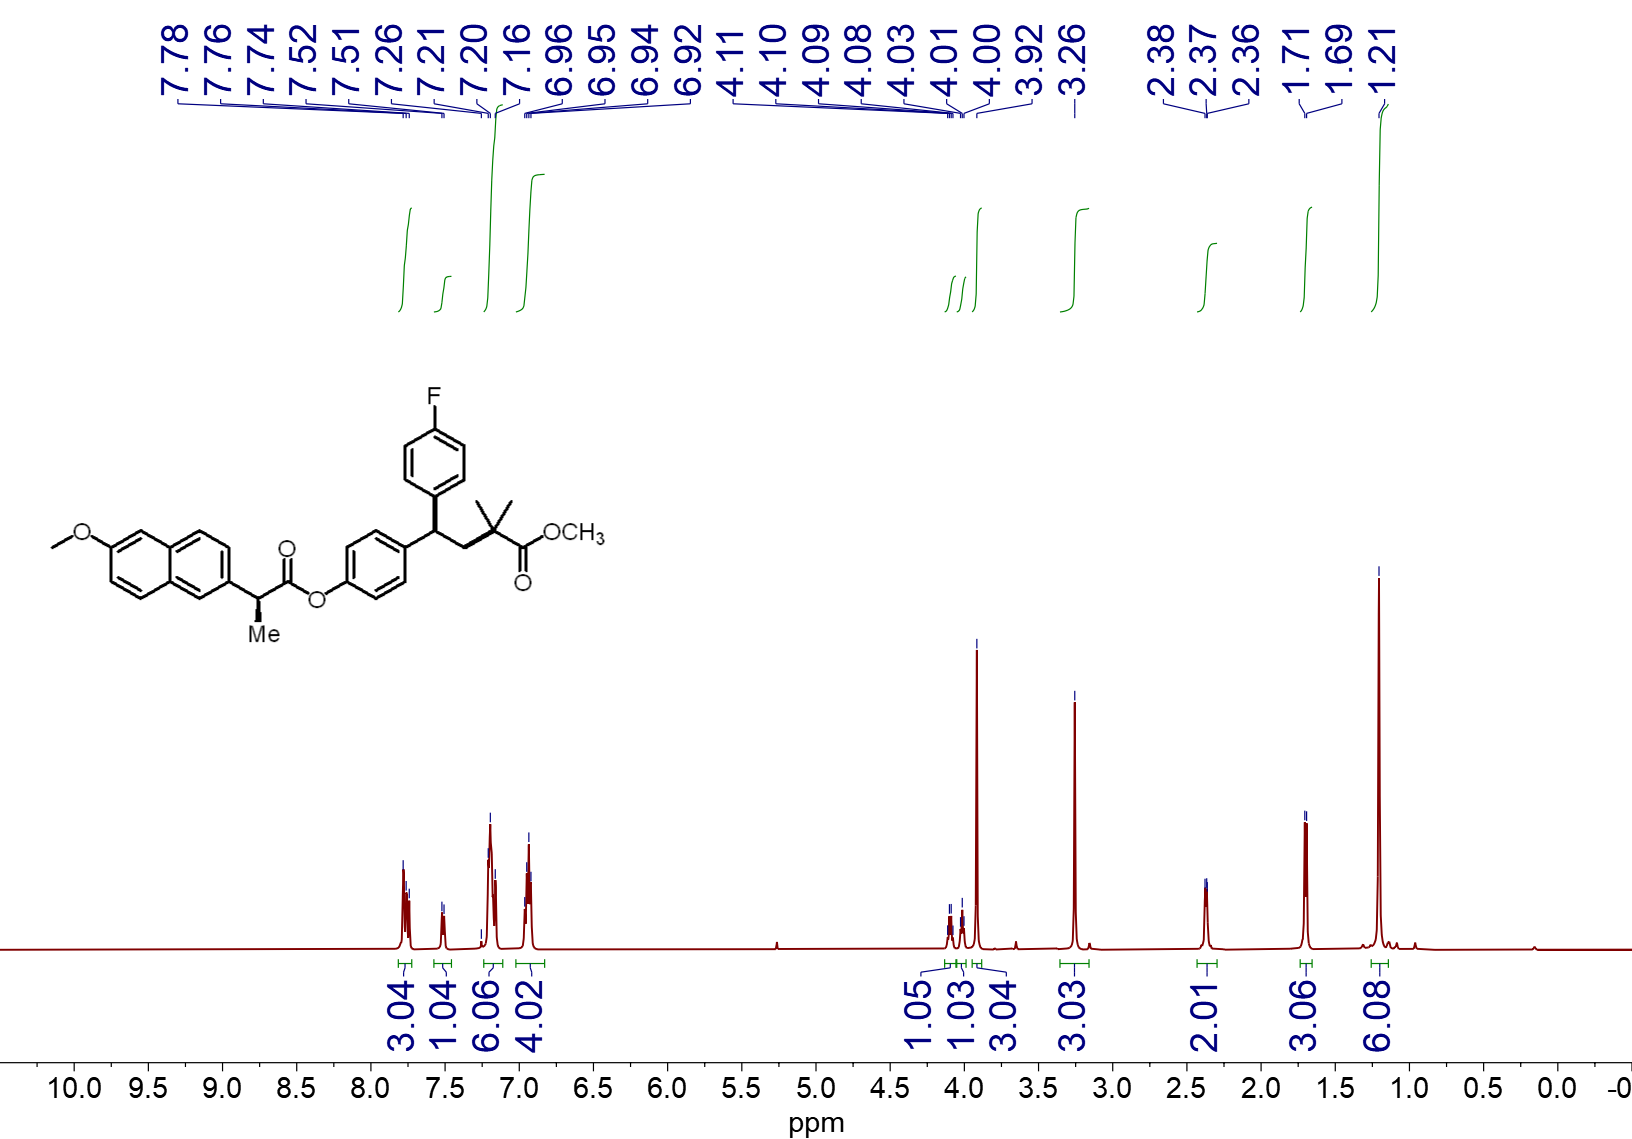


1H NMR spectrum (600 MHz, CDCl3, 23 ºC) of **4v**


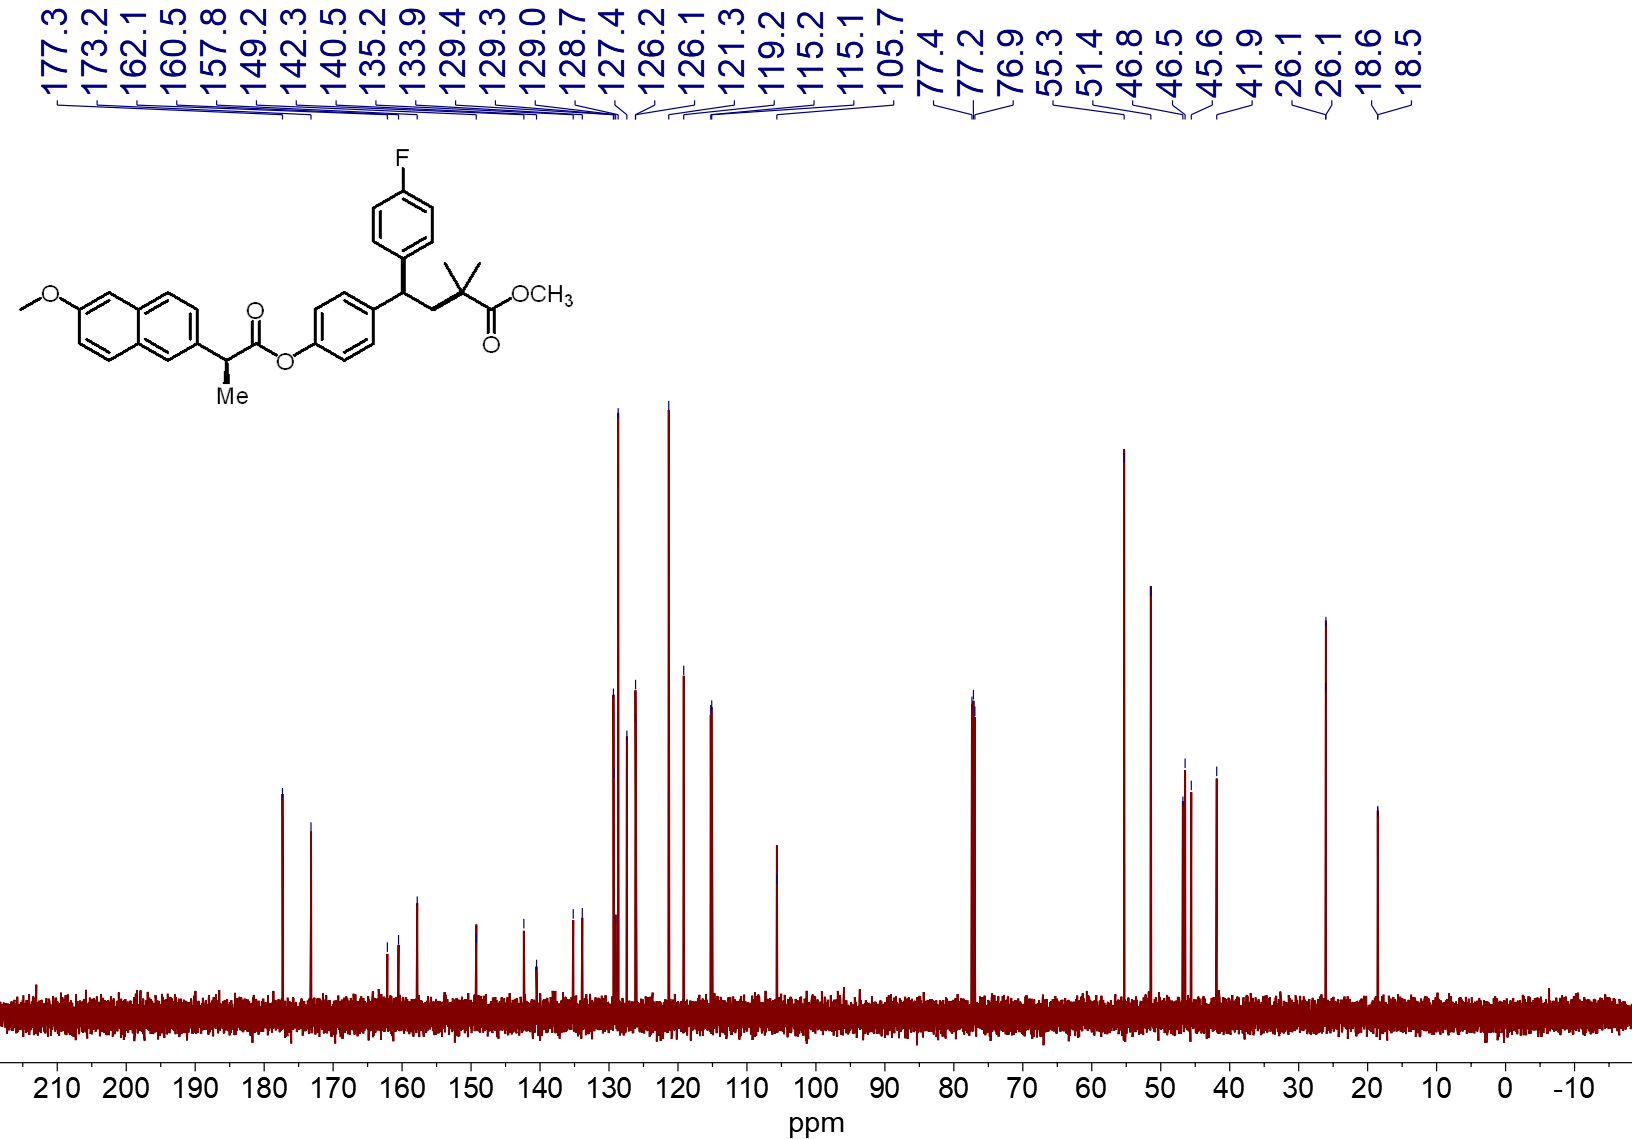


13C NMR spectrum (151 MHz, CDCl3, 23 ºC) of **4v**


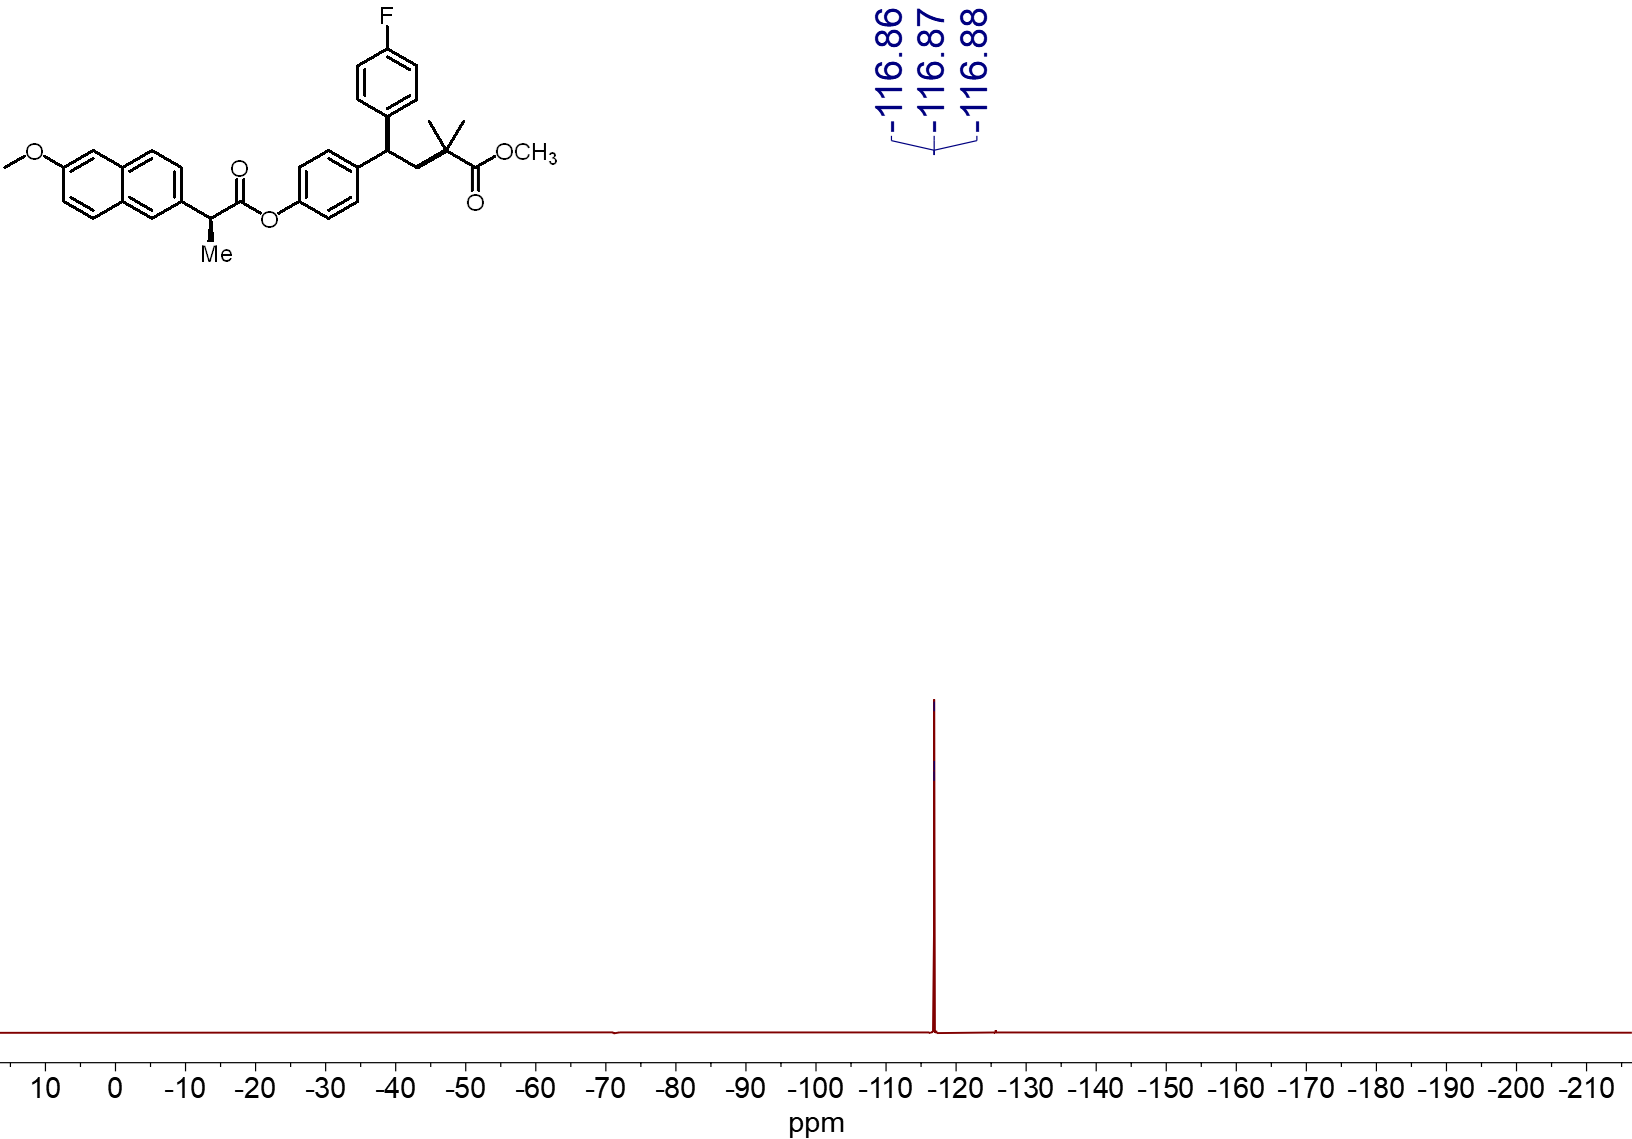


19F NMR spectrum (565 MHz, CDCl3, 23 ºC) of **4v**


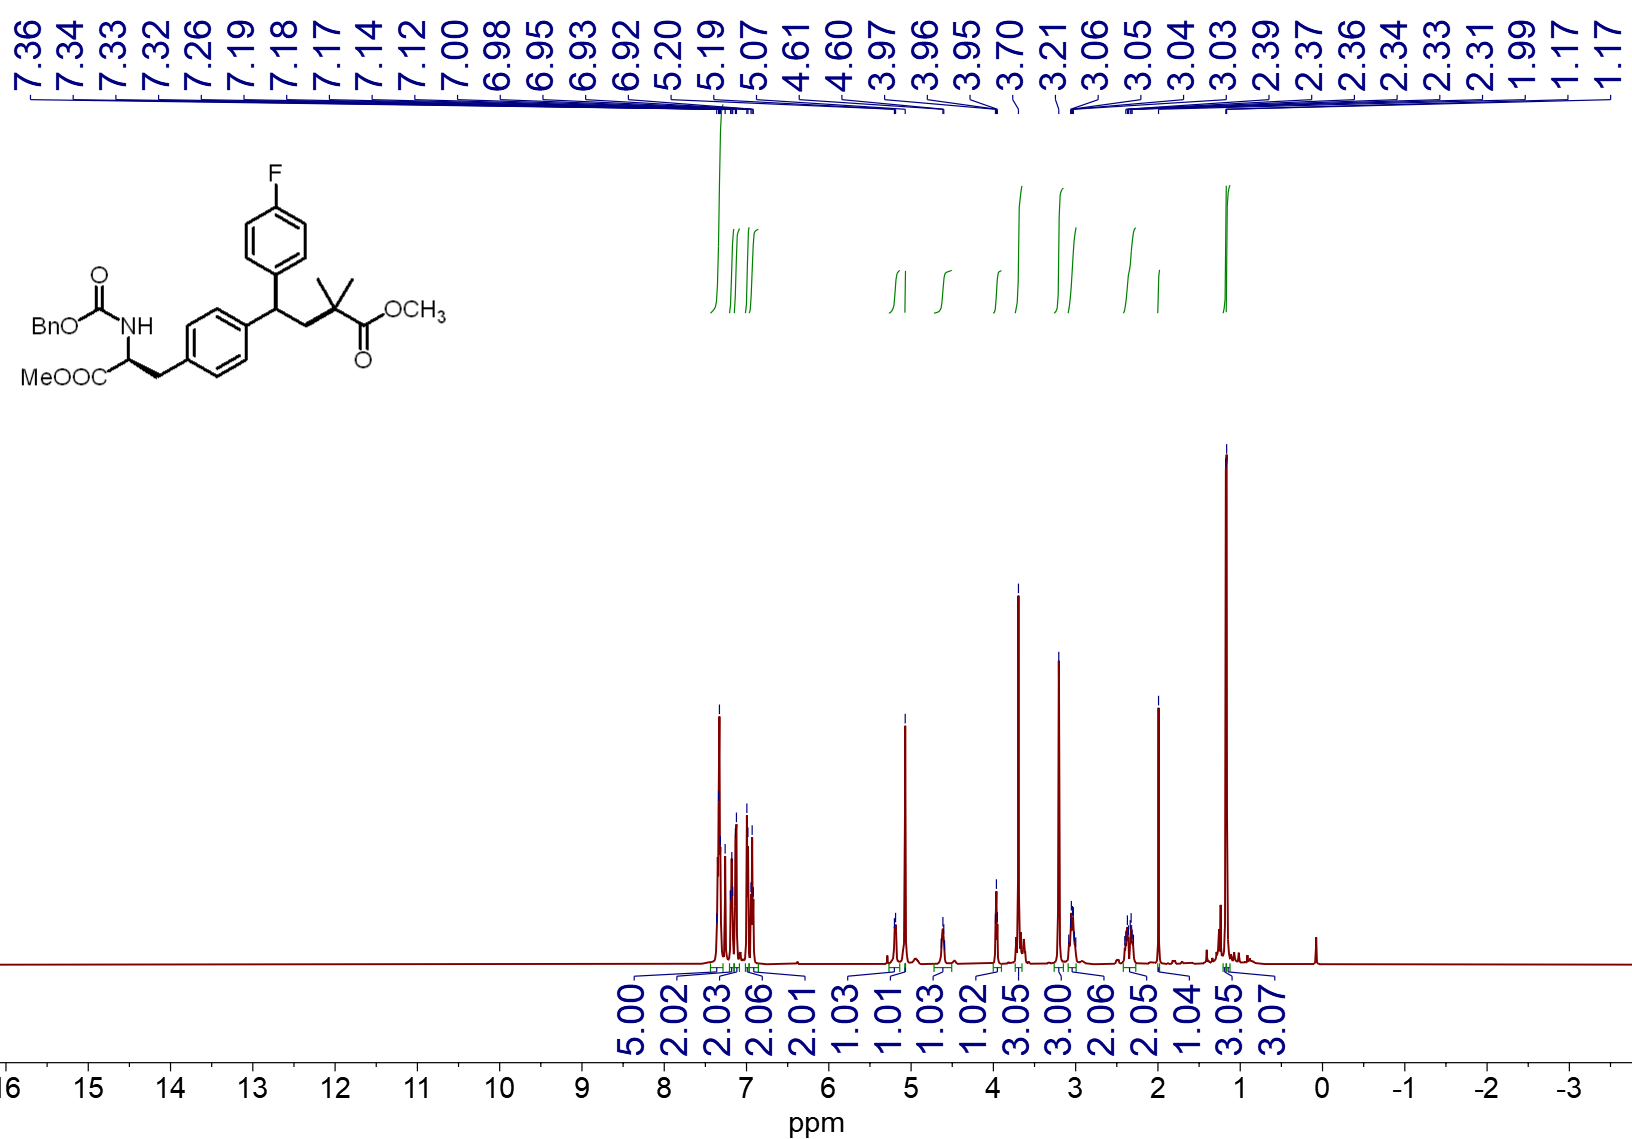


1H NMR spectrum (600 MHz, CDCl3, 23 ºC) of **4w**


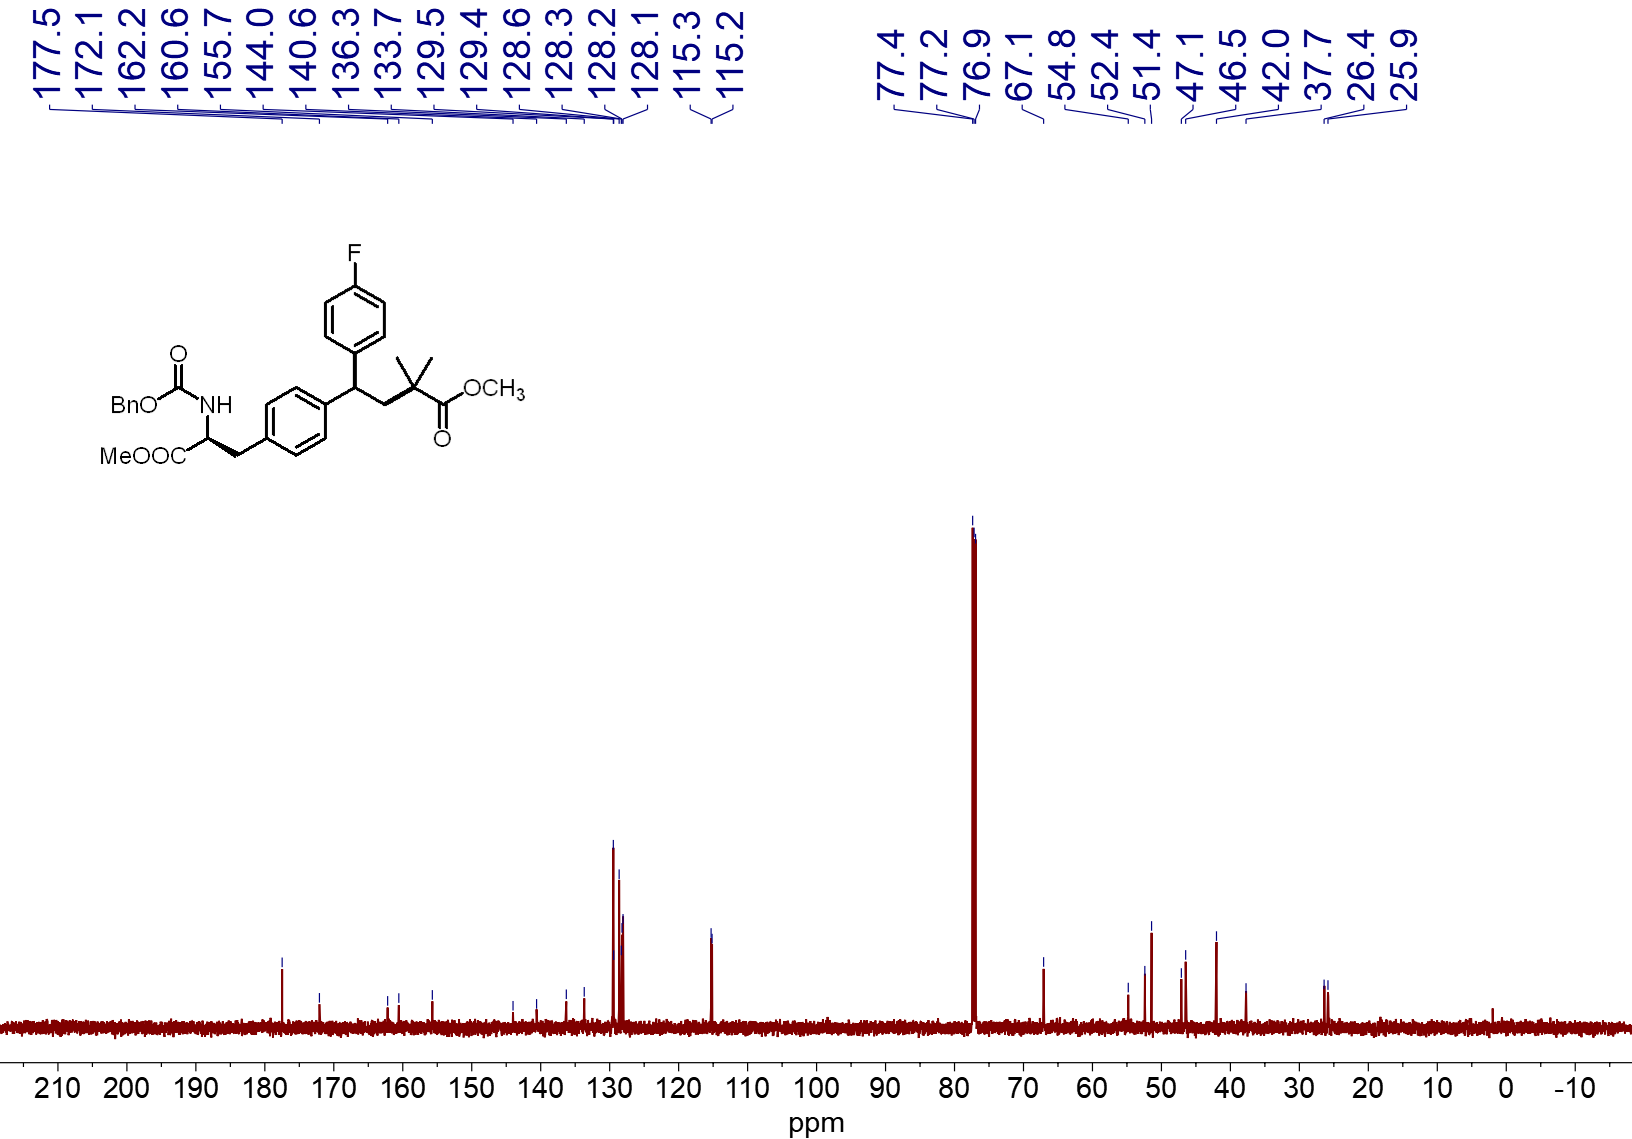


13C NMR spectrum (151 MHz, CDCl3, 23 ºC) of **4w**


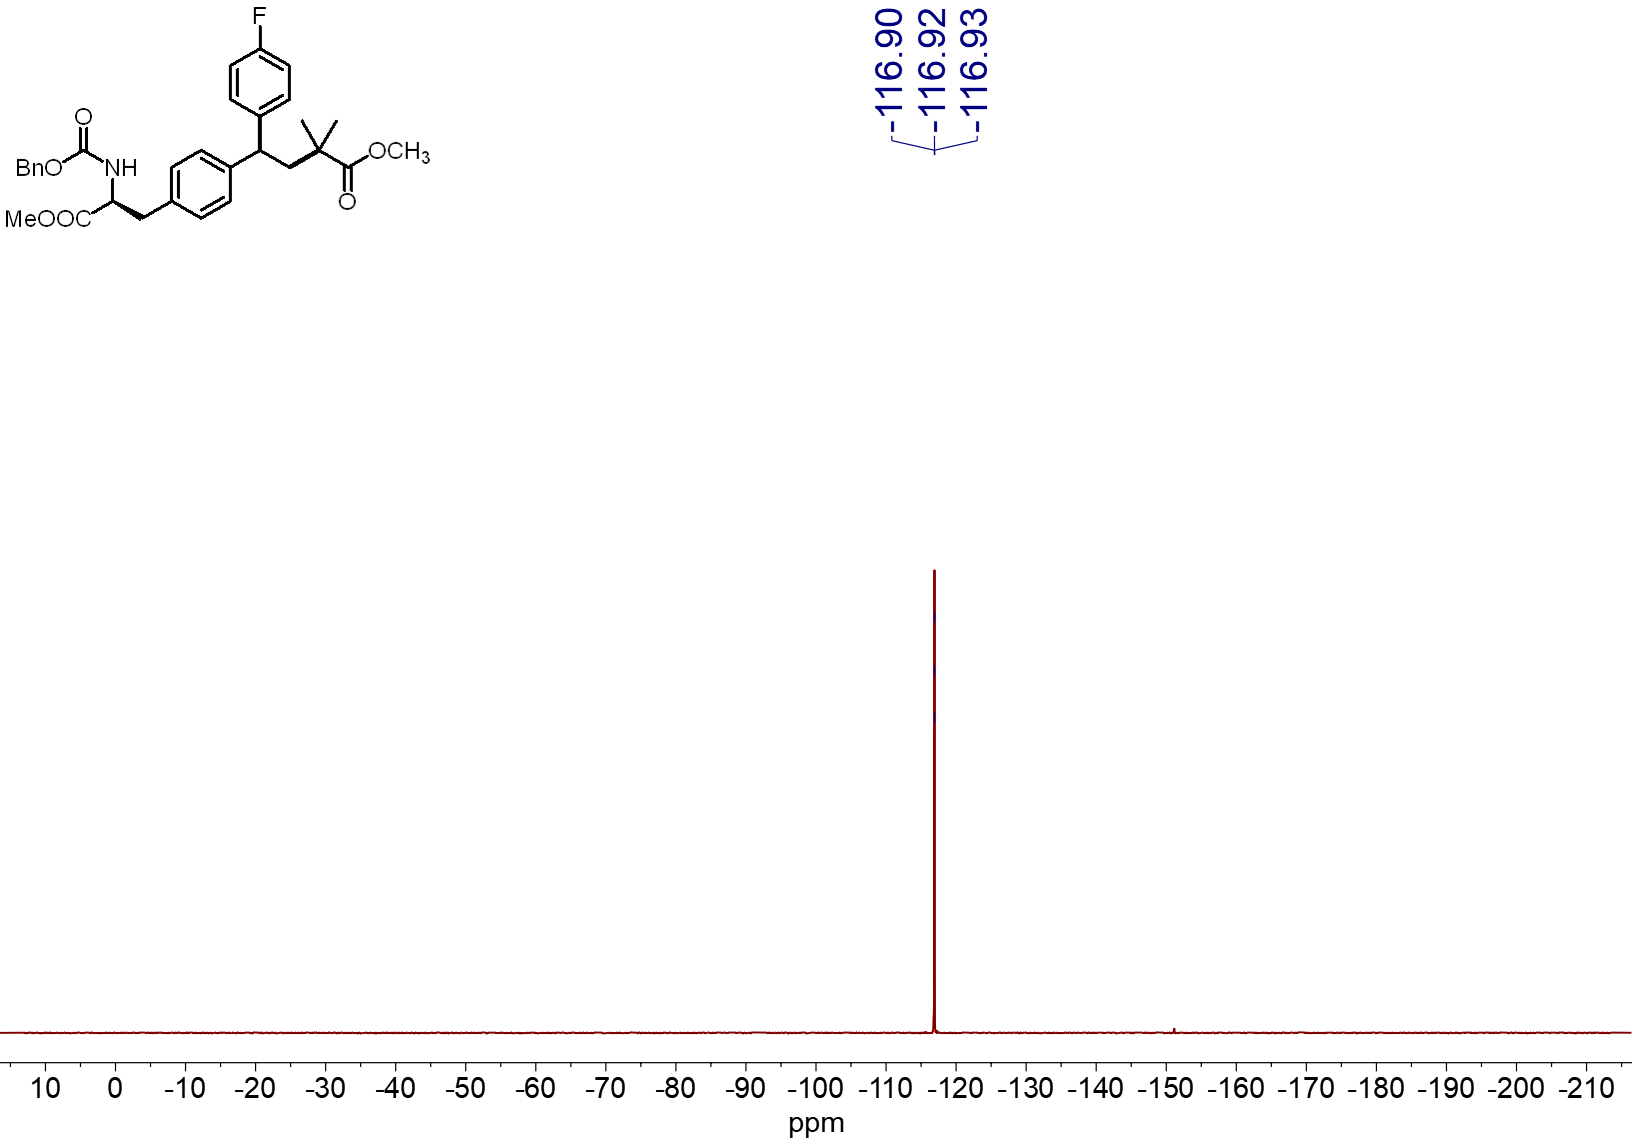


19F NMR spectrum (565 MHz, CDCl3, 23 ºC) of **4w**


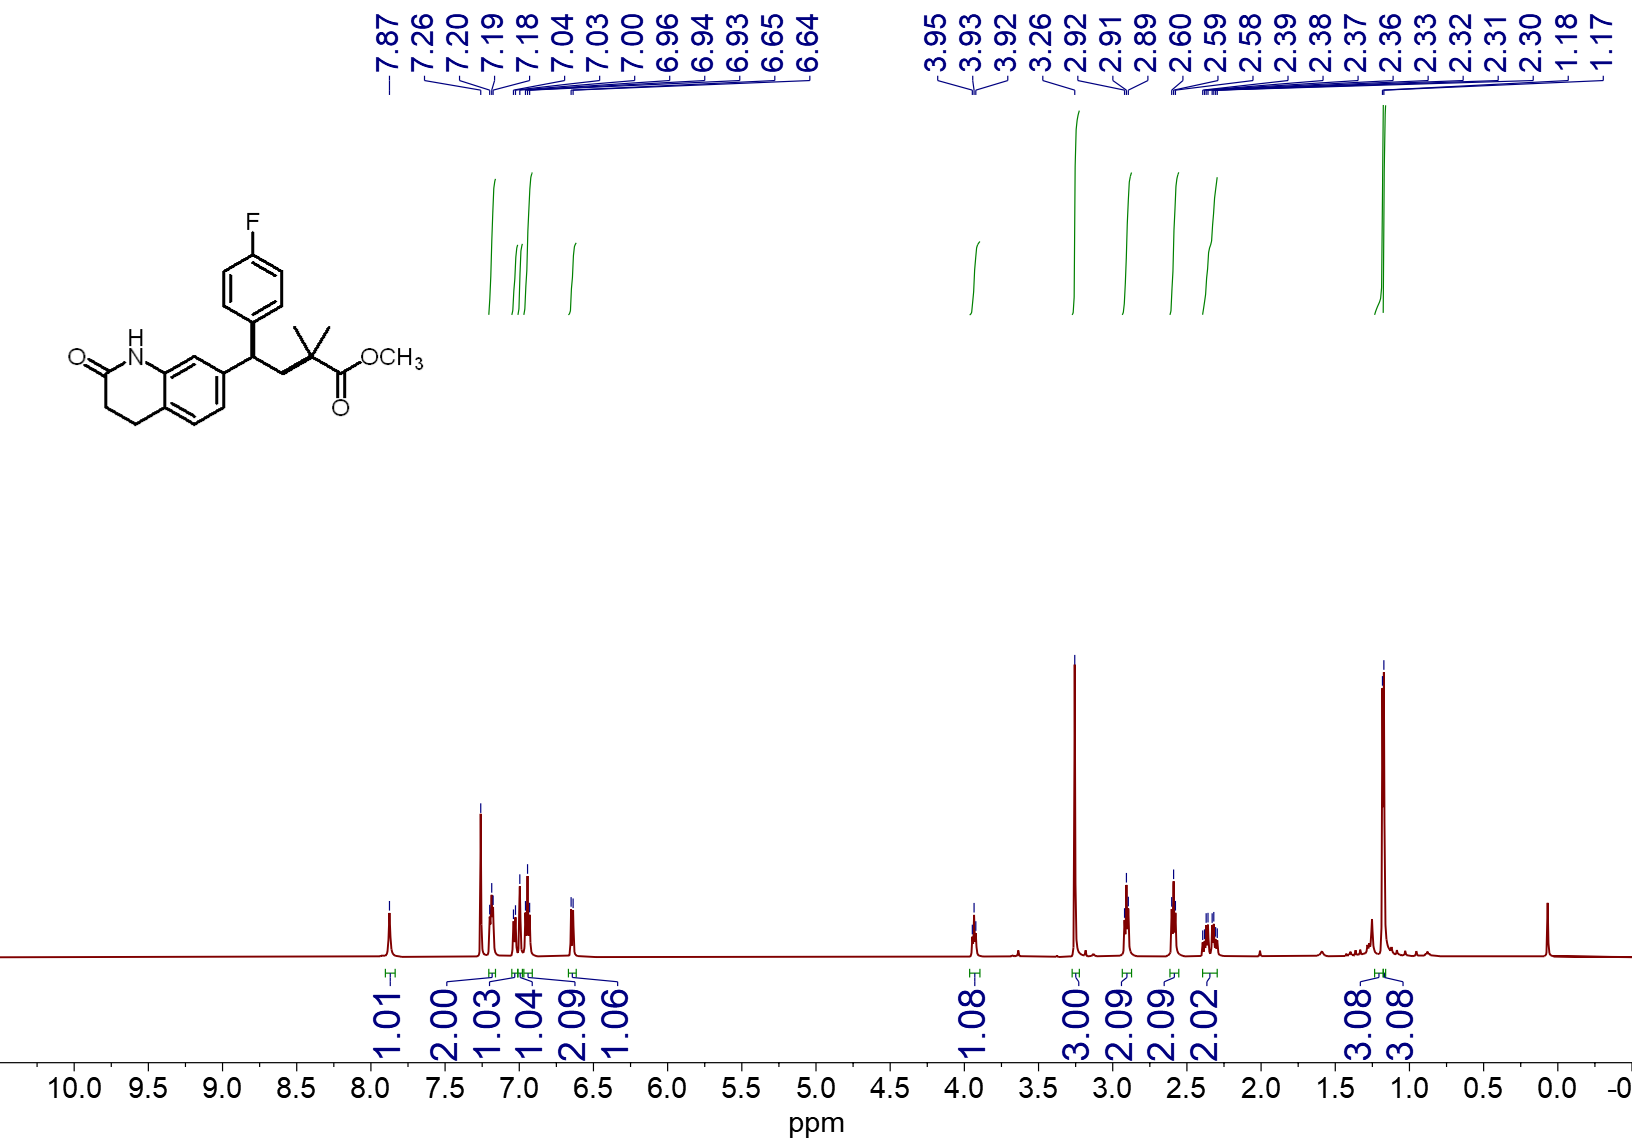
1H NMR spectrum (600 MHz, CDCl3, 23 ºC) of **4x**


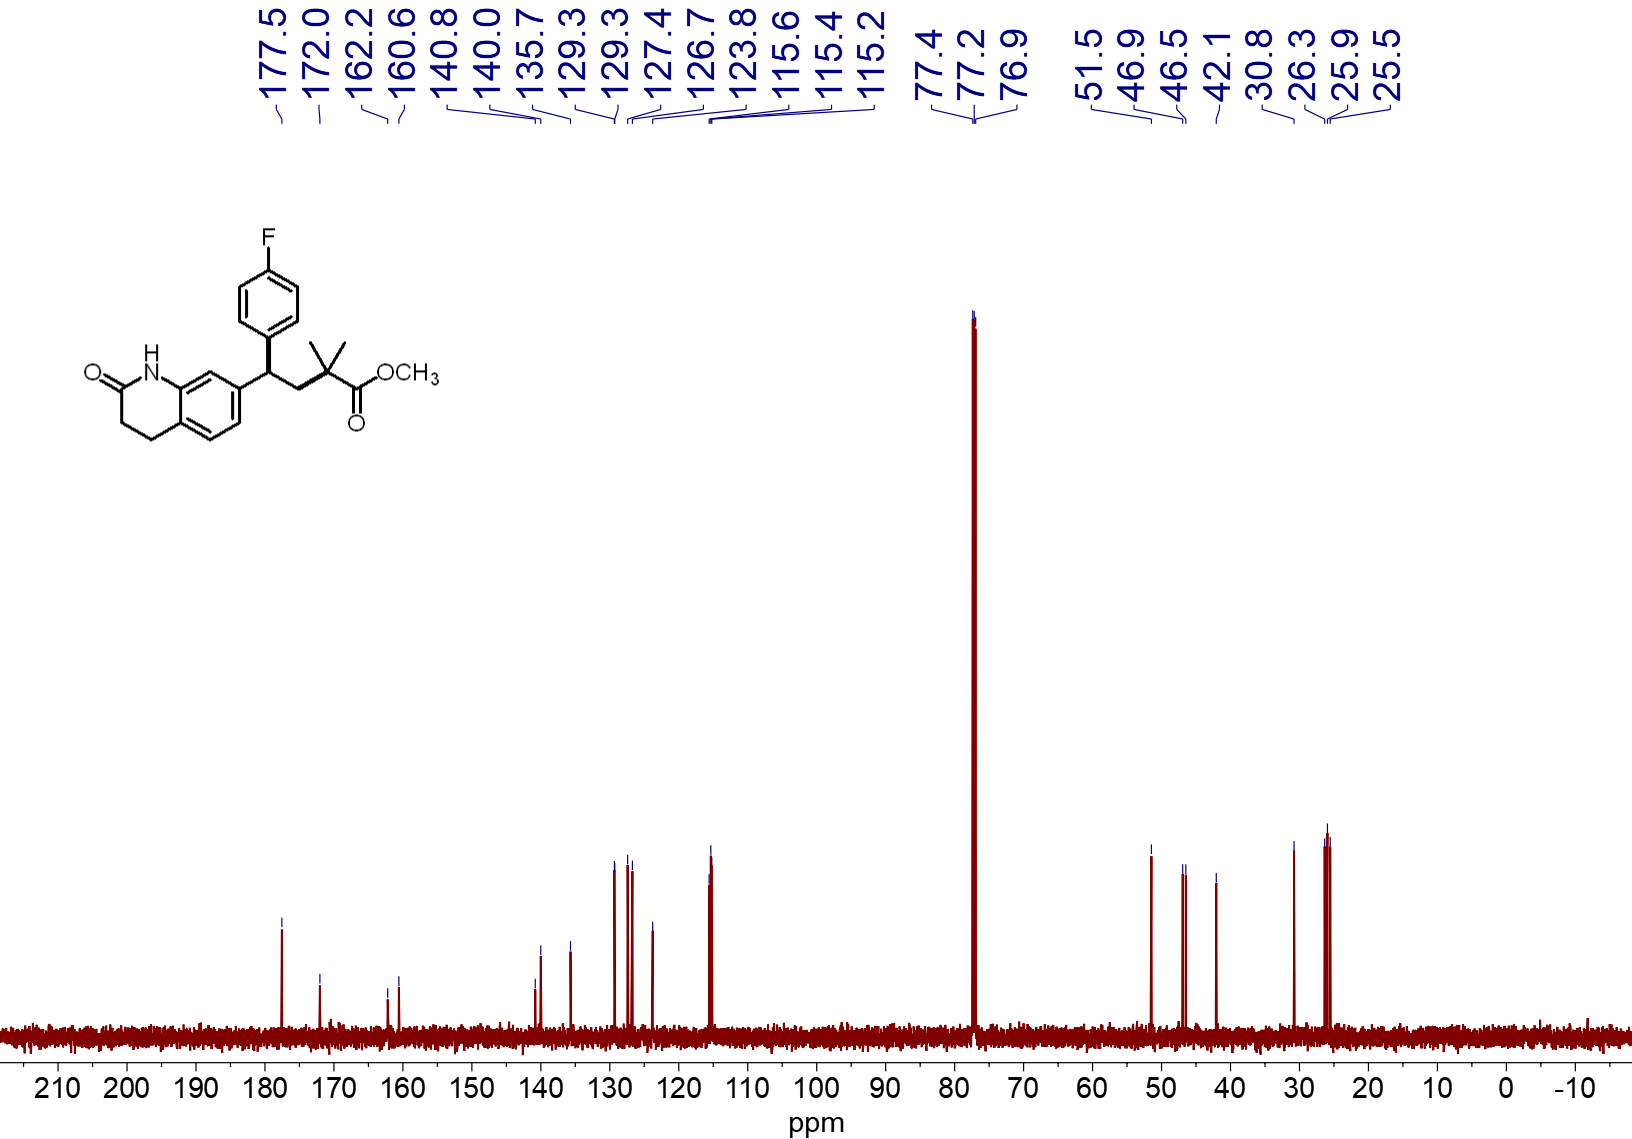
13C NMR spectrum (151 MHz, CDCl3, 23 ºC) of **4x**


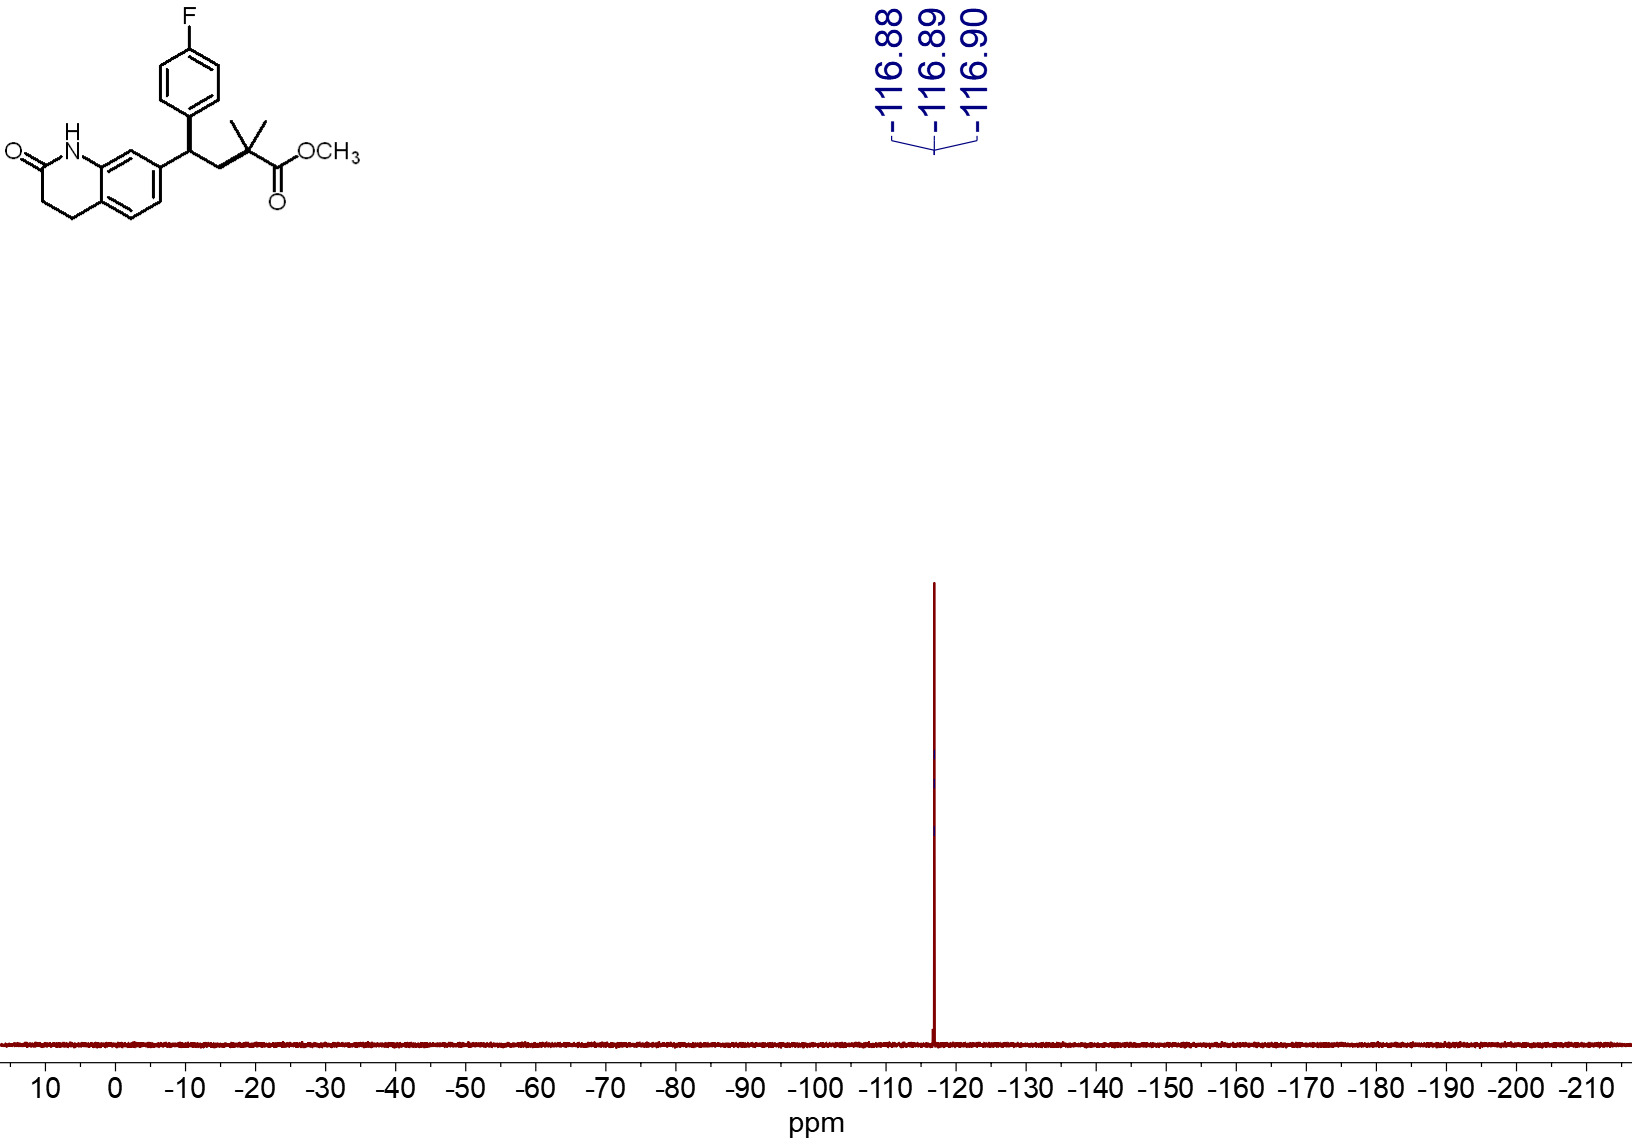


19F NMR spectrum (565 MHz, CDCl3, 23 ºC) of **4x**


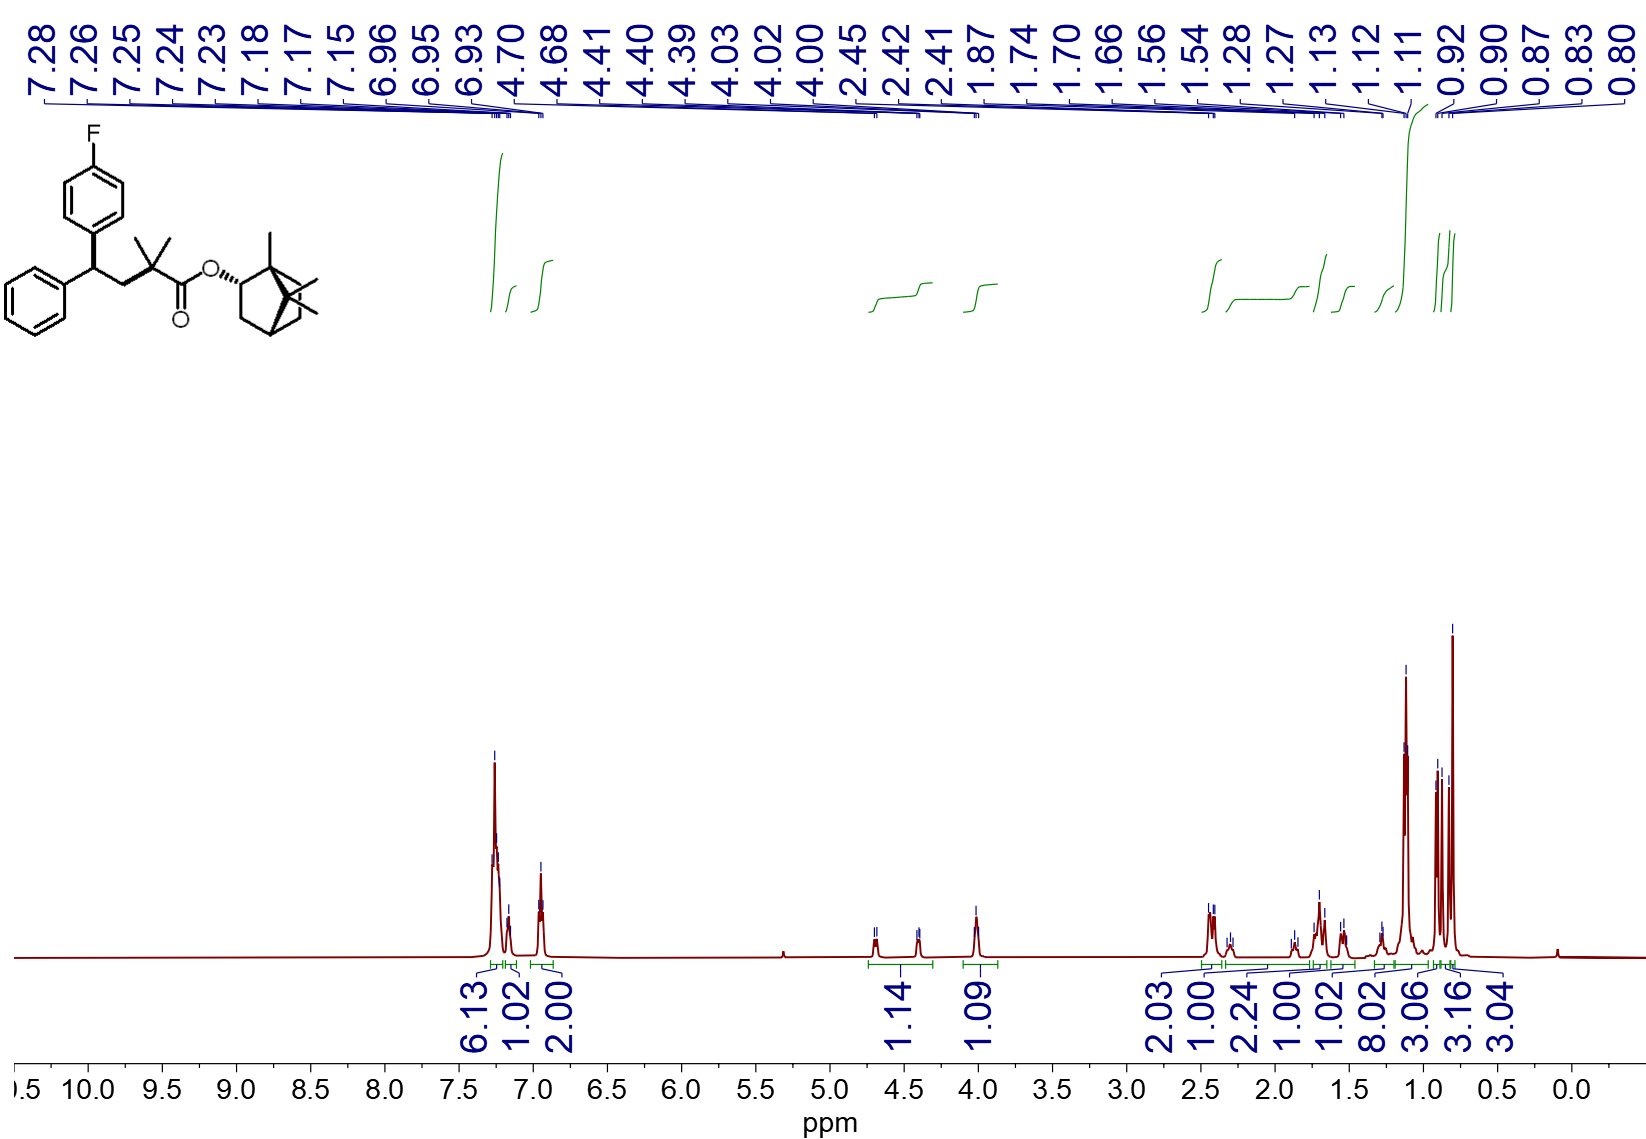


1H NMR spectrum (600 MHz, CDCl3, 23 ºC) of **4y**


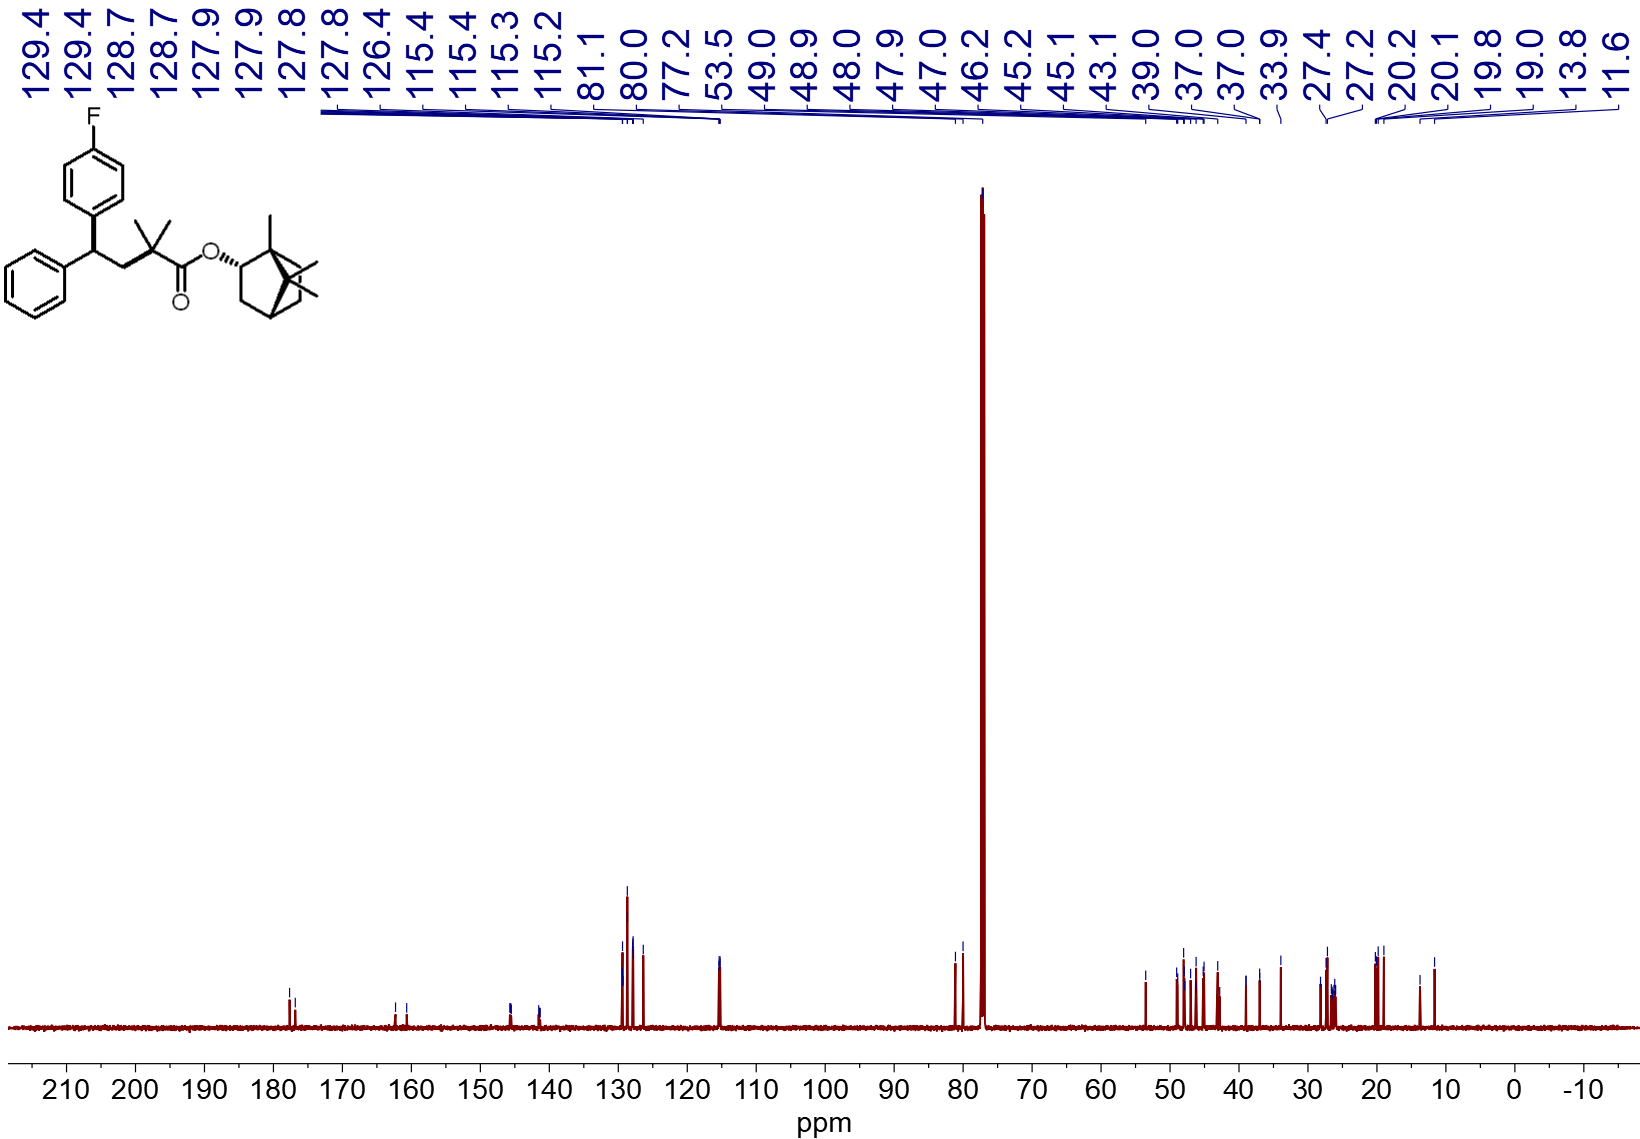


13C NMR spectrum (151 MHz, CDCl3, 23 ºC) of **4y**


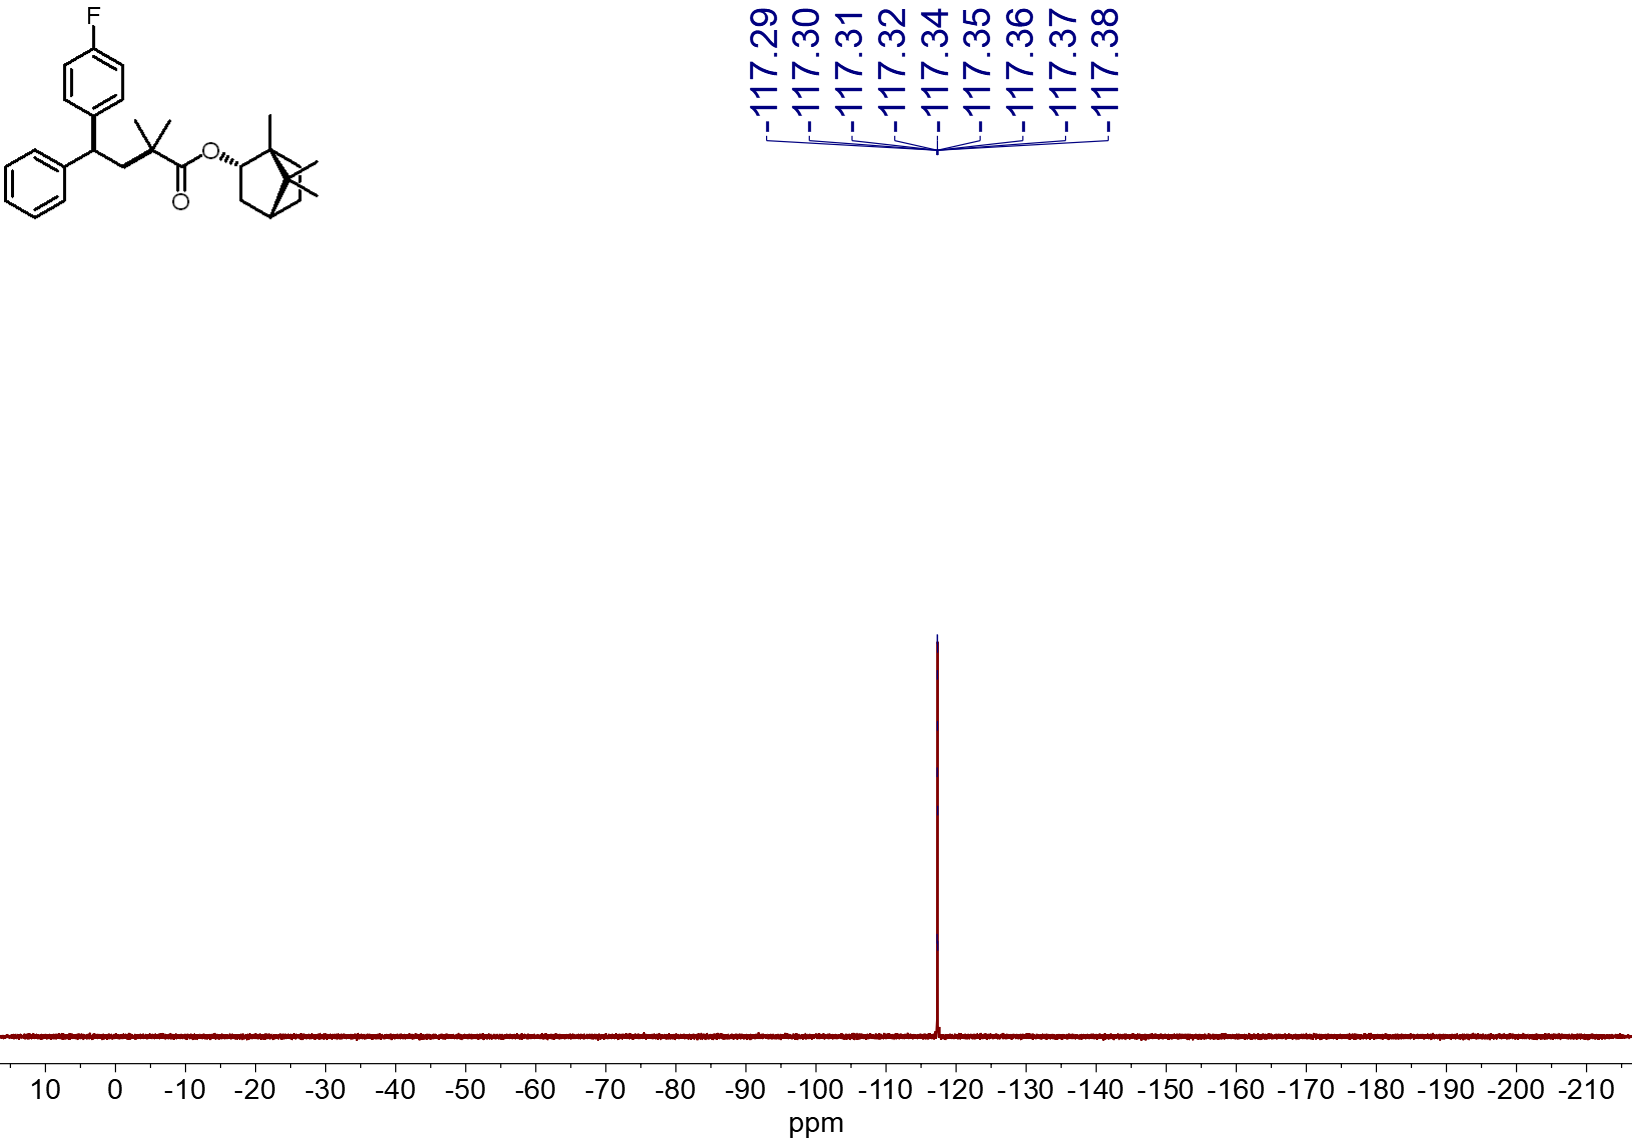


19F NMR spectrum (565 MHz, CDCl3, 23 ºC) of **4y**

1H NMR spectrum (600 MHz, CDCl3, 23 ºC) of **4z**

13C NMR spectrum (151 MHz, CDCl3, 23 ºC) of **4z**

19F NMR spectrum (565 MHz, CDCl3, 23 ºC) of **4z**

1H NMR spectrum (600 MHz, CDCl3, 23 ºC) of **4aa**

13C NMR spectrum (151 MHz, CDCl3, 23 ºC) of **4aa**

19F NMR spectrum (565 MHz, CDCl3, 23 ºC) of **4aa**

1H NMR spectrum (600 MHz, CDCl3, 23 ºC) of **4ab**

13C NMR spectrum (151 MHz, CDCl3, 23 ºC) of **4ab**

19F NMR spectrum (565 MHz, CDCl3, 23 ºC) of **4ab**

1H NMR spectrum (600 MHz, CDCl3, 23 ºC) of **4ac**

13C NMR spectrum (151 MHz, CDCl3, 23 ºC) of **4ac**

19F NMR spectrum (565 MHz, CDCl3, 23 ºC) of **4ac**

1H NMR spectrum (600 MHz, CDCl3, 23 ºC) of **4ad**

13C NMR spectrum (151 MHz, CDCl3, 23 ºC) of **4ad**

19F NMR spectrum (565 MHz, CDCl3, 23 ºC) of **4ad**
